# Supplementary material for: Genome-wide interrogation of gene functions through base editor screens empowered by barcoded sgRNAs
Source: Springer Nature journal article supplement (doi:10.1038/s41587-021-00944-1), 2021-06-21
Supplement: MOESM6 [file 41587_2021_944_MOESM6_ESM%20(1).xlsx]

## Sheet: HeLa_Day 15
Gene	Fitness Score	ZLFC	RRA_depletion	RRA_depletion_FDR	RRA_enrichment	RRA_enrichment_FDR
ZNHIT2	-17.0506	-13.0506	2.22024e-48	3.95935e-44	1	1
YAE1D1	-16.799	-12.799	4.13975e-38	4.34259e-35	1	1
SMC4	-16.4416	-12.4416	6.2552e-47	5.57745e-43	1	1
TRAPPC8	-16.4364	-12.4364	4.69561e-44	2.09342e-40	1	1
EIF2B2	-16.3595	-12.3595	6.62731e-46	3.9395e-42	1	1
RUVBL1	-15.3645	-11.3645	1.74668e-39	2.83168e-36	1	1
CCDC84	-15.0297	-11.0297	7.01875e-32	1.98675e-29	1	1
TRAPPC1	-14.6079	-10.6079	1.7055e-42	6.08282e-39	1	1
CIAO1	-14.5578	-10.5578	5.69086e-41	1.44979e-37	1	1
OIP5	-14.4721	-10.4721	2.77871e-40	6.1941e-37	1	1
EMC3	-14.4185	-10.4185	9.83609e-40	1.7924e-36	1	1
TUBG1	-14.405	-10.405	1.0051e-39	1.7924e-36	1	1
PDCD7	-14.3393	-10.3393	5.28291e-33	1.81173e-30	1	1
ALG1	-14.3102	-10.3102	1.10445e-37	1.03662e-34	1	1
SART3	-14.2071	-10.2071	3.31024e-41	9.8386e-38	1	1
MCM5	-14.2036	-10.2036	2.10043e-39	3.12141e-36	1	1
RNF113A	-14.1792	-10.1792	7.48555e-35	4.02706e-32	1	1
TWISTNB	-14.1738	-10.1738	1.57022e-36	1.21747e-33	1	1
PREB	-14.1508	-10.1508	4.3912e-28	7.18425e-26	1	1
PSMC2	-14.1405	-10.1405	5.8185e-38	5.76451e-35	1	1
NFS1	-14.096	-10.096	1.61793e-32	5.24591e-30	1	1
WDR18	-14.0323	-10.0323	4.11657e-26	5.39785e-24	1	1
GRWD1	-14.0072	-10.0072	1.4251e-35	9.41254e-33	1	1
TRIAP1	-13.9895	-9.98955	1.73077e-26	2.3561e-24	1	1
WDR74	-13.9815	-9.9815	5.337e-29	9.81183e-27	1	1
POLR3D	-13.9018	-9.90184	8.99518e-37	7.63862e-34	1	1
EIF3G	-13.8974	-9.89735	4.78629e-27	6.82832e-25	1	1
SF3B2	-13.8284	-9.82835	7.19258e-34	2.91512e-31	1	1
UHRF1	-13.581	-9.58102	6.04452e-39	7.5229e-36	1	1
ISCA2	-13.5534	-9.55341	2.19995e-32	7.00567e-30	1	1
ZFC3H1	-13.486	-9.48602	7.80295e-36	5.79792e-33	1	1
CDC73	-13.364	-9.36401	7.33271e-37	6.53821e-34	1	1
HSD17B12	-13.3351	-9.33511	1.11496e-38	1.24269e-35	1	1
SETD1B	-13.3261	-9.32609	7.29782e-35	4.02706e-32	1	1
RPS19	-13.1348	-9.13484	3.36399e-28	5.71333e-26	1	1
PSMD14	-13.1227	-9.12268	4.19982e-34	1.79395e-31	1	1
SRSF1	-12.9516	-8.95165	1.37645e-28	2.43033e-26	1	1
PSMB5	-12.8521	-8.8521	3.2778e-34	1.53824e-31	1	1
DDX24	-12.8154	-8.81545	1.20077e-34	5.94816e-32	1	1
SF3B4	-12.7517	-8.75172	2.70591e-34	1.30418e-31	1	1
POLR2I	-12.6795	-8.67948	9.8975e-35	5.04292e-32	1	1
TXNL4A	-12.6538	-8.65379	6.85181e-24	7.06291e-22	1	1
MED11	-12.6447	-8.64467	5.73811e-34	2.37971e-31	1	1
USP39	-12.627	-8.62703	3.82059e-24	4.03151e-22	1	1
CCS	-12.6088	-8.6088	1.15714e-31	3.17466e-29	1	1
PES1	-12.573	-8.57299	1.18188e-21	8.85562e-20	1	1
PHB2	-12.5253	-8.52534	2.19467e-28	3.76322e-26	1	1
MRPL18	-12.5234	-8.52339	5.36539e-25	6.46493e-23	1	1
MRPS18C	-12.5079	-8.50794	1.67986e-35	1.06989e-32	1	1
METTL17	-12.5011	-8.50114	8.11967e-30	1.64543e-27	1	1
NUP133	-12.4965	-8.49649	1.55625e-29	3.0739e-27	1	1
NAA10	-12.4782	-8.47821	4.00324e-25	4.88971e-23	1	1
COPA	-12.4604	-8.46038	6.32779e-39	7.5229e-36	1	1
UTP23	-12.4313	-8.43134	1.56312e-24	1.75315e-22	1	1
ZNF830	-12.4275	-8.42751	2.96733e-39	4.07049e-36	1	1
THAP1	-12.415	-8.41505	1.2279e-23	1.23712e-21	1	1
NOP56	-12.3892	-8.38916	1.19588e-22	1.061e-20	1	1
MCM2	-12.3622	-8.36218	2.58444e-33	9.60173e-31	1	1
WDR12	-12.3171	-8.31712	2.66168e-35	1.63675e-32	1	1
HSPA9	-12.2517	-8.25173	1.18138e-24	1.3592e-22	1	1
NCAPG	-12.2171	-8.21707	5.95833e-30	1.25006e-27	1	1
MRPL33	-12.19	-8.19	1.29929e-23	1.3017e-21	1	1
GTF3C1	-12.1718	-8.17177	2.58389e-22	2.16331e-20	1	1
CLNS1A	-12.1346	-8.13461	2.46389e-27	3.66154e-25	1	1
CDK7	-12.0779	-8.07791	1.50596e-36	1.21747e-33	1	1
RARS2	-12.0672	-8.06716	1.41593e-20	9.74913e-19	1	1
TRMT112	-12.0579	-8.05792	5.40258e-25	6.46605e-23	1	1
RPL7	-12.0401	-8.04008	4.33982e-25	5.26476e-23	1	1
RPS5	-12.0304	-8.03044	1.38541e-24	1.57363e-22	1	1
RPS11	-12.0285	-8.02849	4.86807e-23	4.52147e-21	1	1
AAMP	-12.0201	-8.02015	3.44968e-32	1.07927e-29	1	1
GINS2	-11.9953	-7.9953	1.87441e-20	1.27097e-18	1	1
TUT1	-11.9764	-7.97637	1.00476e-31	2.79967e-29	1	1
RPLP0	-11.9542	-7.9542	1.03667e-22	9.2435e-21	1	1
YARS2	-11.9251	-7.92511	1.56858e-29	3.0739e-27	1	1
SLC7A6OS	-11.9024	-7.90244	5.58257e-20	3.54285e-18	1	1
RPS4X	-11.9011	-7.90115	7.71593e-20	4.77772e-18	1	1
ATP6V0B	-11.8965	-7.89649	3.38324e-29	6.48746e-27	1	1
TYMS	-11.8707	-7.87072	1.55703e-21	1.13333e-19	1	1
TOP1	-11.8237	-7.82368	2.75735e-35	1.63906e-32	1	1
PELO	-11.8152	-7.81522	2.95235e-30	6.42064e-28	1	1
DTYMK	-11.8091	-7.80906	3.10244e-35	1.7847e-32	1	1
RSL24D1	-11.7971	-7.79712	7.65778e-30	1.56967e-27	1	1
MEPCE	-11.7725	-7.77254	2.79153e-20	1.83695e-18	1	1
UBA2	-11.7713	-7.77133	1.35904e-22	1.19388e-20	1	1
HJURP	-11.7664	-7.76638	3.08129e-24	3.27075e-22	1	1
CAD	-11.7634	-7.76344	5.19378e-33	1.81173e-30	1	1
EIF2B5	-11.7506	-7.7506	7.36748e-28	1.17307e-25	1	1
GAR1	-11.7482	-7.74816	4.21455e-22	3.41627e-20	1	1
BUB3	-11.7214	-7.7214	4.85938e-24	5.06768e-22	1	1
RPLP2	-11.7164	-7.71637	9.44184e-23	8.54702e-21	1	1
HYOU1	-11.7126	-7.71264	2.09942e-28	3.63486e-26	1	1
MRPL34	-11.7059	-7.70591	6.51863e-32	1.90568e-29	1	1
DDX10	-11.6974	-7.69738	4.22508e-34	1.79395e-31	1	1
MDN1	-11.6518	-7.65175	6.40965e-30	1.32911e-27	1	1
BNIP1	-11.6443	-7.64428	2.69814e-29	5.23e-27	1	1
EXOSC4	-11.6334	-7.63338	4.45102e-26	5.75181e-24	1	1
RPS2	-11.6303	-7.63031	1.26214e-26	1.73136e-24	1	1
SNAPC2	-11.623	-7.62304	1.96115e-24	2.1456e-22	1	1
DIEXF	-11.6086	-7.60858	2.17723e-33	8.26096e-31	1	1
SNAPC5	-11.6029	-7.60286	2.05471e-22	1.75319e-20	1	1
HARS	-11.5671	-7.56709	2.41563e-20	1.60739e-18	1	1
MRPS26	-11.5257	-7.52567	2.5256e-22	2.12448e-20	1	1
DYNLRB1	-11.5082	-7.50822	1.41426e-19	8.52045e-18	1	1
PFDN6	-11.4974	-7.49736	2.28358e-26	3.06188e-24	1	1
EIF5A	-11.497	-7.49697	7.01195e-22	5.49821e-20	1	1
HAUS3	-11.4875	-7.48752	4.79807e-32	1.45024e-29	1	1
EXOSC7	-11.4822	-7.48219	2.63639e-19	1.53143e-17	1	1
OGT	-11.4709	-7.47093	6.22772e-25	7.40393e-23	1	1
INTS6	-11.4387	-7.43869	2.50709e-21	1.79554e-19	1	1
RPL23	-11.3854	-7.38537	8.35134e-31	2.01256e-28	1	1
RFC3	-11.3339	-7.33388	8.53681e-20	5.21359e-18	1	1
SF3A2	-11.2862	-7.28618	2.38654e-31	5.99424e-29	1	1
ANAPC4	-11.2838	-7.28379	2.15291e-22	1.82823e-20	1	1
DHX35	-11.2791	-7.27911	4.9441e-19	2.79899e-17	1	1
ALDOA	-11.2743	-7.27434	1.72078e-22	1.49691e-20	1	1
SNRPE	-11.2373	-7.23726	8.66449e-22	6.66008e-20	1	1
SRSF3	-11.2286	-7.22858	2.19458e-27	3.28874e-25	1	1
MED20	-11.221	-7.22102	1.83715e-22	1.59038e-20	1	1
CCDC86	-11.2187	-7.21874	4.13082e-23	3.91835e-21	1	1
CENPI	-11.2005	-7.20053	1.12133e-33	4.44369e-31	1	1
MAX	-11.1984	-7.19841	5.20883e-23	4.8129e-21	1	1
PSMB3	-11.1751	-7.17506	1.26501e-20	8.8815e-19	1	1
MED12	-11.1681	-7.1681	1.00741e-21	7.64476e-20	1	1
GPN2	-11.1611	-7.16106	6.29962e-31	1.53892e-28	1	1
EMC7	-11.1589	-7.15894	1.48403e-21	1.08909e-19	1	1
INTS5	-11.1467	-7.14665	1.3768e-35	9.41254e-33	1	1
CACTIN	-11.1447	-7.1447	5.83197e-32	1.73336e-29	1	1
DNAJC17	-11.1346	-7.1346	1.33992e-31	3.62042e-29	1	1
WDR77	-11.1341	-7.13411	3.96236e-17	1.82115e-15	1	1
RPL24	-11.1173	-7.11727	1.42387e-19	8.54943e-18	1	1
ELL	-11.0946	-7.0946	1.05372e-30	2.4404e-28	1	1
DCTN5	-11.0474	-7.04735	9.21917e-36	6.57622e-33	1	1
CHEK1	-11.0401	-7.04014	1.53034e-24	1.72725e-22	1	1
TIMM22	-10.99	-6.98998	3.22249e-20	2.09732e-18	1	1
UQCRC1	-10.9774	-6.97737	6.53482e-23	5.97617e-21	1	1
NAE1	-10.9765	-6.9765	7.67791e-35	4.02706e-32	1	1
RPL18A	-10.97	-6.96997	2.78629e-18	1.48322e-16	1	1
FAU	-10.9652	-6.96521	4.39868e-20	2.83183e-18	1	1
SARS	-10.9503	-6.95027	2.85559e-24	3.0677e-22	1	1
PSMG3	-10.9447	-6.94474	1.07245e-21	8.10378e-20	1	1
NUDCD3	-10.8958	-6.89576	1.30289e-21	9.64086e-20	1	1
TOMM22	-10.8825	-6.88248	2.13295e-31	5.43384e-29	1	1
POLR2B	-10.8772	-6.87723	7.00763e-27	9.76305e-25	1	1
SURF6	-10.8616	-6.86164	1.6038e-23	1.58014e-21	1	1
NKAP	-10.8481	-6.84806	1.32396e-20	9.22271e-19	1	1
PSMA1	-10.8121	-6.81211	1.48744e-30	3.27476e-28	1	1
GNB1L	-10.8116	-6.81158	1.45906e-28	2.55092e-26	1	1
CDC16	-10.8064	-6.80643	6.75199e-33	2.27185e-30	1	1
POLR1C	-10.7998	-6.79979	4.34709e-20	2.80876e-18	1	1
TICRR	-10.7888	-6.78878	4.58432e-32	1.40952e-29	1	1
FCF1	-10.7822	-6.78219	2.302e-22	1.94557e-20	1	1
GOSR2	-10.7745	-6.77453	4.43143e-17	2.0263e-15	1	1
TIMM13	-10.7534	-6.75343	4.45569e-18	2.30983e-16	1	1
GPKOW	-10.7395	-6.73953	3.1514e-20	2.06614e-18	1	1
GEMIN5	-10.7329	-6.73291	4.09899e-22	3.33777e-20	1	1
EIF2B3	-10.7312	-6.73123	4.15908e-26	5.41378e-24	1	1
RPS20	-10.719	-6.71902	8.06029e-20	4.95652e-18	1	1
ENO1	-10.7057	-6.70566	1.84704e-20	1.25719e-18	1	1
YY1	-10.665	-6.66503	2.9756e-18	1.5746e-16	1	1
DDOST	-10.6359	-6.63585	3.29835e-18	1.73509e-16	1	1
NACA	-10.6242	-6.62421	9.56478e-31	2.24432e-28	1	1
EIF3I	-10.6162	-6.61621	4.01629e-22	3.28543e-20	1	1
SRM	-10.6085	-6.60851	8.77843e-31	2.08728e-28	1	1
EIF4G1	-10.5787	-6.57867	4.70446e-20	3.01779e-18	1	1
TUBGCP5	-10.5515	-6.55151	3.87781e-34	1.72883e-31	1	1
RPL10A	-10.5489	-6.54891	2.1881e-21	1.57977e-19	1	1
SRP72	-10.5456	-6.54557	2.68689e-20	1.78124e-18	0.297209	1
XPO1	-10.5369	-6.53693	1.6558e-22	1.44745e-20	1	1
COX11	-10.5367	-6.53669	4.25753e-29	7.99205e-27	1	1
PPP1R12A	-10.5151	-6.51513	1.38438e-33	5.36688e-31	1	1
PSMA4	-10.4998	-6.4998	8.7525e-26	1.09918e-23	1	1
RPS8	-10.4977	-6.49771	5.91644e-17	2.64431e-15	1	1
EXOSC3	-10.4907	-6.49066	2.43282e-17	1.1417e-15	1	1
NDUFAB1	-10.4757	-6.4757	4.3883e-28	7.18425e-26	1	1
HDAC8	-10.4713	-6.47134	1.26496e-21	9.39919e-20	1	1
TMED10	-10.4637	-6.4637	1.4841e-20	1.01792e-18	1	1
PRPF38B	-10.4629	-6.46295	1.57257e-19	9.34789e-18	1	1
AHCY	-10.46	-6.45996	1.09033e-21	8.20416e-20	1	1
MYC	-10.4548	-6.4548	3.82909e-34	1.72883e-31	1	1
CCAR1	-10.4463	-6.44631	1.75844e-20	1.20147e-18	1	1
MPI	-10.4306	-6.43062	9.65726e-33	3.18922e-30	1	1
RBFA	-10.4235	-6.42346	1.94266e-18	1.04663e-16	1	1
RAD1	-10.4195	-6.41953	7.02961e-22	5.49821e-20	1	1
SNRNP40	-10.413	-6.41299	8.96004e-24	9.18301e-22	1	1
RNPC3	-10.4108	-6.41078	1.60214e-27	2.44196e-25	1	1
VPS13D	-10.3997	-6.39973	2.5972e-22	2.1643e-20	1	1
PRMT5	-10.398	-6.39804	6.13878e-20	3.85468e-18	1	1
RPS18	-10.3944	-6.39444	1.34357e-16	5.71833e-15	1	1
ADSS	-10.3872	-6.38717	6.8075e-32	1.95803e-29	1	1
FNTB	-10.3798	-6.37979	7.90492e-20	4.8778e-18	1	1
CCT8	-10.3695	-6.36946	3.37662e-19	1.92998e-17	1	1
NAA30	-10.3635	-6.36348	7.17486e-15	2.52864e-13	1	1
METTL14	-10.3487	-6.34871	1.29298e-19	7.81619e-18	1	1
UNC45A	-10.3394	-6.33935	2.30997e-16	9.55771e-15	1	1
TOE1	-10.3284	-6.32841	9.84066e-23	8.81851e-21	1	1
INTS9	-10.3239	-6.32393	1.136e-30	2.56435e-28	1	1
NOM1	-10.3123	-6.31233	2.85178e-18	1.51357e-16	1	1
RAN	-10.2885	-6.28851	1.48995e-18	8.15037e-17	1	1
UTP15	-10.27	-6.26998	3.9739e-17	1.82176e-15	1	1
PGD	-10.2696	-6.26956	3.47707e-14	1.14615e-12	1	1
TAF1C	-10.2696	-6.26955	1.76036e-27	2.66039e-25	1	1
CENPA	-10.2664	-6.2664	1.5179e-19	9.08347e-18	1	1
RPS23	-10.259	-6.25903	1.13771e-19	6.92452e-18	1	1
DHX30	-10.2577	-6.25765	3.16512e-20	2.06753e-18	1	1
CHAF1A	-10.2245	-6.2245	2.47769e-19	1.45824e-17	1	1
SYS1	-10.2138	-6.21378	9.61316e-18	4.76199e-16	1	1
ATR	-10.2099	-6.2099	7.23567e-17	3.1939e-15	1	1
PUF60	-10.184	-6.18404	6.89577e-19	3.86705e-17	1	1
EIF4A1	-10.183	-6.18296	3.26189e-19	1.87039e-17	1	1
CENPT	-10.1793	-6.17926	1.89991e-31	4.98252e-29	1	1
CPSF3L	-10.1779	-6.17789	2.31969e-15	8.51172e-14	1	1
AFG3L2	-10.1371	-6.13705	1.88082e-18	1.01639e-16	1	1
PPAN	-10.1246	-6.12463	3.51983e-17	1.63036e-15	0.299871	1
FDX1L	-10.1207	-6.12072	3.85544e-15	1.38617e-13	1	1
MED18	-10.1196	-6.11964	9.44274e-28	1.4902e-25	1	1
VPS72	-10.1181	-6.11811	2.77435e-19	1.60633e-17	1	1
GLTSCR2	-10.1134	-6.11338	8.73739e-29	1.57388e-26	1	1
MRPS6	-10.0969	-6.09691	7.89067e-15	2.75911e-13	1	1
GARS	-10.0771	-6.07712	4.65423e-17	2.11732e-15	1	1
TIMELESS	-10.0767	-6.07669	7.1986e-20	4.47291e-18	1	1
WDR1	-10.0644	-6.06438	1.1955e-19	7.25146e-18	1	1
MAD2L2	-10.0484	-6.04842	2.30678e-15	8.48182e-14	1	1
PRPF38A	-10.0465	-6.0465	2.42829e-18	1.30041e-16	1	1
CPSF2	-10.027	-6.02702	1.10068e-17	5.4222e-16	1	1
CYC1	-10.0211	-6.02115	1.20153e-26	1.661e-24	1	1
KTI12	-10.0188	-6.01875	4.18839e-27	6.07248e-25	1	1
SNRPB	-10.016	-6.01604	4.41064e-18	2.29315e-16	1	1
MVK	-10.0149	-6.01488	4.98408e-22	4.00366e-20	1	1
XPO5	-9.99457	-5.99457	1.42527e-14	4.88785e-13	1	1
PLK4	-9.99272	-5.99272	9.85952e-30	1.97556e-27	1	1
DYNC1H1	-9.98701	-5.98701	2.95298e-27	4.35211e-25	1	1
TUBB	-9.98649	-5.98649	3.9898e-24	4.1853e-22	1	1
POLR2A	-9.96754	-5.96754	1.49832e-25	1.86849e-23	1	1
LAMTOR2	-9.96465	-5.96465	4.52845e-30	9.72962e-28	1	1
LAS1L	-9.9508	-5.9508	9.38332e-23	8.53738e-21	1	1
EIF3B	-9.94795	-5.94795	5.23852e-22	4.17047e-20	1	1
RPL3	-9.94289	-5.94289	1.41204e-20	9.74913e-19	1	1
SPATA5	-9.9379	-5.9379	2.84005e-16	1.16429e-14	1	1
EIF3D	-9.93265	-5.93265	4.56827e-16	1.80634e-14	1	1
RABGGTA	-9.92355	-5.92355	4.64461e-17	2.11732e-15	1	1
CCDC115	-9.91329	-5.91329	6.38473e-26	8.0751e-24	1	1
CIAPIN1	-9.91318	-5.91318	2.54462e-18	1.35863e-16	1	1
ATP2A2	-9.90441	-5.90441	3.91539e-26	5.17208e-24	1	1
RBX1	-9.90019	-5.90019	8.11413e-21	5.74204e-19	1	1
ATP6V0C	-9.89804	-5.89804	5.50717e-28	8.92812e-26	1	1
RPS13	-9.88543	-5.88543	4.39707e-33	1.60026e-30	1	1
UPF1	-9.88125	-5.88125	4.86446e-27	6.88476e-25	1	1
SEC61B	-9.87505	-5.87505	6.12115e-18	3.11881e-16	1	1
POLE	-9.87309	-5.87309	5.01956e-22	4.01407e-20	1	1
RIOK2	-9.8221	-5.8221	3.54547e-18	1.85414e-16	1	1
KIF4A	-9.82166	-5.82166	4.80765e-30	1.02065e-27	1	1
RPS3	-9.82095	-5.82095	3.78551e-15	1.36378e-13	1	1
SS18L2	-9.80697	-5.80697	4.83256e-20	3.08765e-18	1	1
TFRC	-9.7856	-5.7856	2.05822e-20	1.37469e-18	1	1
TSEN54	-9.78154	-5.78154	8.05361e-17	3.52875e-15	1	1
NAF1	-9.77895	-5.77895	3.87359e-23	3.694e-21	1	1
PSMG4	-9.777	-5.777	1.05187e-27	1.63768e-25	1	1
TNPO3	-9.77497	-5.77497	1.34079e-20	9.3036e-19	1	1
INTS1	-9.76287	-5.76287	1.73203e-17	8.32542e-16	1	1
MED28	-9.75434	-5.75434	9.04976e-29	1.61384e-26	1	1
CARS	-9.74812	-5.74812	1.35349e-23	1.34842e-21	1	1
RPL13A	-9.74518	-5.74518	4.90907e-24	5.08973e-22	1	1
YKT6	-9.74508	-5.74508	1.97774e-20	1.33091e-18	1	1
CSTF3	-9.73889	-5.73889	5.71014e-28	9.17378e-26	1	1
DONSON	-9.71566	-5.71566	2.78635e-19	1.60806e-17	1	1
RAD21	-9.71168	-5.71168	8.53358e-11	2.06765e-09	1	1
TTC1	-9.70064	-5.70064	4.48448e-29	8.33039e-27	1	1
RPS29	-9.69577	-5.69577	2.3968e-17	1.12776e-15	1	1
RANGAP1	-9.68357	-5.68357	2.22139e-12	6.17041e-11	1	1
PPIL1	-9.67286	-5.67286	2.59315e-19	1.51619e-17	1	1
CCNA2	-9.64643	-5.64643	3.07839e-18	1.62417e-16	1	1
RAE1	-9.6462	-5.6462	1.15588e-13	3.66123e-12	1	1
WDR73	-9.64586	-5.64586	5.66806e-21	4.02703e-19	1	1
TAF8	-9.64486	-5.64486	9.27985e-22	7.07212e-20	1	1
MRPL45	-9.63826	-5.63826	3.06165e-19	1.76124e-17	1	1
KIN	-9.63624	-5.63624	4.20635e-29	7.97997e-27	1	1
BOP1	-9.63479	-5.63479	1.14733e-24	1.32859e-22	1	1
PRPF31	-9.62801	-5.62801	8.18419e-22	6.31812e-20	1	1
PRPF19	-9.62508	-5.62508	7.78405e-18	3.92127e-16	1	1
ISG20L2	-9.62332	-5.62332	2.61666e-19	1.52493e-17	1	1
BCAS2	-9.61025	-5.61025	3.13995e-12	8.62785e-11	1	1
CDCA5	-9.59982	-5.59982	2.97e-24	3.1715e-22	1	1
RPS19BP1	-9.57768	-5.57768	4.79658e-33	1.71075e-30	1	1
MAK16	-9.57649	-5.57649	2.08374e-13	6.45126e-12	1	1
UBE2N	-9.57573	-5.57573	1.33946e-22	1.1825e-20	1	1
CAPZB	-9.56832	-5.56832	1.51994e-15	5.64689e-14	1	1
SFPQ	-9.56734	-5.56734	1.55615e-19	9.28122e-18	1	1
DPAGT1	-9.55855	-5.55855	6.78035e-14	2.17471e-12	1	1
SUPT5H	-9.55071	-5.55071	1.31899e-30	2.94018e-28	1	1
MRPL52	-9.54062	-5.54062	5.6991e-20	3.60398e-18	1	1
AK6	-9.53661	-5.53661	1.02057e-18	5.66971e-17	1	1
RBM22	-9.53415	-5.53415	8.47196e-17	3.70295e-15	1	1
WDR25	-9.53035	-5.53035	1.11211e-30	2.54261e-28	1	1
ABT1	-9.52587	-5.52587	3.82177e-12	1.0453e-10	1	1
DDX3X	-9.51309	-5.51309	2.15054e-12	6.00166e-11	1	1
C18orf21	-9.50777	-5.50777	1.79987e-14	6.14886e-13	1	1
CDC40	-9.50543	-5.50543	2.82659e-14	9.42181e-13	1	1
SKA3	-9.504	-5.504	2.26773e-17	1.07269e-15	1	1
CDS2	-9.4729	-5.4729	1.19473e-15	4.49484e-14	1	1
CINP	-9.47187	-5.47187	1.94173e-17	9.25853e-16	1	1
PSMC1	-9.47167	-5.47167	1.13089e-16	4.85957e-15	1	1
MRPL11	-9.46573	-5.46573	4.752e-13	1.41002e-11	1	1
PPP4C	-9.46338	-5.46338	1.62347e-18	8.83842e-17	1	1
SUPV3L1	-9.43864	-5.43864	2.63607e-16	1.08566e-14	1	1
MRPL38	-9.43518	-5.43518	1.95756e-31	5.0593e-29	1	1
CHAF1B	-9.43199	-5.43199	3.88564e-18	2.0261e-16	1	1
CWC22	-9.42426	-5.42426	8.23025e-20	5.04365e-18	1	1
PLK1	-9.41877	-5.41877	4.37489e-28	7.18425e-26	1	1
AATF	-9.41749	-5.41749	3.89536e-31	9.64805e-29	1	1
DCTN2	-9.40085	-5.40085	1.2379e-18	6.81344e-17	1	1
ROMO1	-9.38542	-5.38542	1.14243e-14	3.9406e-13	1	1
BRF2	-9.36787	-5.36787	1.89145e-17	9.06725e-16	1	1
EXOSC1	-9.36414	-5.36414	2.02649e-18	1.08851e-16	1	1
RPL11	-9.34225	-5.34225	2.49604e-26	3.32179e-24	1	1
MCM3	-9.34112	-5.34112	4.77507e-23	4.45832e-21	1	1
SRP54	-9.34042	-5.34042	1.19405e-14	4.11071e-13	1	1
SF1	-9.33212	-5.33212	6.50894e-22	5.13602e-20	1	1
NMD3	-9.31276	-5.31276	4.66609e-23	4.3795e-21	1	1
SNRPC	-9.3114	-5.3114	3.68488e-20	2.38954e-18	1	1
PCNA	-9.31093	-5.31093	1.55224e-17	7.52205e-16	1	1
TUBG2	-9.31073	-5.31073	3.22108e-14	1.06769e-12	1	1
RRP12	-9.2915	-5.2915	2.30424e-17	1.08707e-15	1	1
NCAPH	-9.28534	-5.28534	6.72723e-19	3.78444e-17	1	1
RPL10	-9.28083	-5.28083	8.48206e-19	4.72689e-17	1	1
SIN3A	-9.27723	-5.27723	9.70865e-17	4.21252e-15	1	1
SSU72	-9.27025	-5.27025	7.47059e-16	2.86501e-14	1	1
MRPS10	-9.26035	-5.26035	7.78906e-11	1.89498e-09	1	1
SNW1	-9.25896	-5.25896	8.40509e-18	4.21034e-16	1	1
SARS2	-9.24735	-5.24735	1.6966e-12	4.77969e-11	1	1
MTHFD1	-9.24698	-5.24698	1.97756e-21	1.43357e-19	1	1
RPL4	-9.22843	-5.22843	3.49801e-15	1.26789e-13	1	1
CAMLG	-9.22744	-5.22744	3.95528e-22	3.25044e-20	1	1
CDC20	-9.22338	-5.22338	2.6794e-17	1.25411e-15	1	1
ARCN1	-9.21729	-5.21729	1.21522e-17	5.93728e-16	1	1
MED9	-9.21415	-5.21415	1.60271e-16	6.76864e-15	1	1
RPN2	-9.20913	-5.20913	6.55929e-25	7.74648e-23	1	1
SRSF7	-9.20337	-5.20337	8.76867e-16	3.34127e-14	1	1
SLC35B1	-9.19892	-5.19892	1.15303e-17	5.66447e-16	1	1
UBA1	-9.19842	-5.19842	5.18413e-16	2.03631e-14	1	1
RNPS1	-9.19333	-5.19333	6.38686e-20	3.99638e-18	1	1
NOC4L	-9.18769	-5.18769	2.01052e-24	2.1862e-22	1	1
PHF5A	-9.18459	-5.18459	2.25819e-17	1.07102e-15	1	1
GTF2H3	-9.18338	-5.18338	4.5263e-19	2.57062e-17	1	1
NOP16	-9.17639	-5.17639	9.99858e-18	4.93919e-16	1	1
SNRNP27	-9.17297	-5.17297	3.6131e-10	8.26057e-09	1	1
NCBP2	-9.16944	-5.16944	2.89725e-16	1.1796e-14	1	1
CUL1	-9.159	-5.159	4.92373e-13	1.45855e-11	1	1
SCO1	-9.15014	-5.15014	3.92934e-19	2.23872e-17	1	1
TAF12	-9.14227	-5.14227	7.50932e-17	3.29837e-15	1	1
SLC20A2	-9.12016	-5.12016	3.36097e-18	1.76283e-16	1	1
DCTN3	-9.11948	-5.11948	7.91047e-22	6.13337e-20	1	1
PSMD6	-9.1101	-5.1101	7.49781e-16	2.86928e-14	1	1
MCM6	-9.10736	-5.10736	7.98044e-15	2.7796e-13	1	1
NUP88	-9.08903	-5.08903	9.09857e-13	2.6086e-11	1	1
ELP4	-9.08649	-5.08649	3.86741e-12	1.05616e-10	1	1
GPI	-9.08504	-5.08504	9.52461e-18	4.73126e-16	1	1
IPO7	-9.08278	-5.08278	1.02667e-18	5.68589e-17	1	1
RNMT	-9.07788	-5.07788	1.05609e-27	1.63768e-25	1	1
INTS4	-9.07653	-5.07653	1.17774e-16	5.04869e-15	1	1
GINS4	-9.0682	-5.0682	7.34922e-13	2.13451e-11	1	1
WBP4	-9.06807	-5.06807	8.58948e-18	4.29065e-16	1	1
ZC3H13	-9.06718	-5.06718	6.61335e-18	3.36e-16	1	1
GTF2F2	-9.04133	-5.04133	6.85155e-12	1.81282e-10	1	1
PI4KA	-9.03635	-5.03635	3.78269e-25	4.65218e-23	1	1
POLR2G	-9.0356	-5.0356	2.88002e-16	1.17797e-14	1	1
MRPL3	-9.0232	-5.0232	1.77735e-16	7.45778e-15	1	1
PMPCB	-9.00999	-5.00999	1.14506e-11	2.98537e-10	1	1
GPN1	-9.00768	-5.00768	5.70561e-17	2.55648e-15	1	1
SACM1L	-8.99228	-4.99228	4.84799e-20	3.08765e-18	1	1
EMG1	-8.99029	-4.99029	1.83532e-11	4.70925e-10	1	1
FNTA	-8.98877	-4.98877	1.60553e-16	6.76864e-15	1	1
ORC1	-8.98078	-4.98078	9.20628e-17	4.01407e-15	1	1
HEXIM1	-8.97091	-4.97091	4.70507e-17	2.12958e-15	1	1
TUBE1	-8.97066	-4.97066	8.90498e-18	4.43582e-16	1	1
XRCC5	-8.96685	-4.96685	3.07036e-17	1.4296e-15	1	1
RBM42	-8.94744	-4.94744	4.36025e-28	7.18425e-26	1	1
CUL3	-8.94632	-4.94632	3.81942e-27	5.58293e-25	1	1
CCT7	-8.94224	-4.94224	5.51062e-18	2.82388e-16	1	1
SLC39A7	-8.94119	-4.94119	1.45756e-17	7.08249e-16	1	1
IK	-8.93885	-4.93885	7.07732e-16	2.72591e-14	1	1
RAD51	-8.92715	-4.92715	7.43838e-22	5.79252e-20	1	1
CHMP4B	-8.9255	-4.9255	6.65097e-11	1.62698e-09	1	1
CDIPT	-8.92409	-4.92409	8.46907e-16	3.23402e-14	1	1
UMPS	-8.91798	-4.91798	2.81649e-12	7.76297e-11	1	1
DDI2	-8.90244	-4.90244	2.11613e-16	8.7965e-15	1	1
HTATSF1	-8.90227	-4.90227	2.94125e-13	8.9355e-12	1	1
GTF2H4	-8.8933	-4.8933	1.7656e-24	1.95565e-22	1	1
LETM1	-8.88183	-4.88183	3.50709e-23	3.37153e-21	1	1
WDR82	-8.85008	-4.85008	1.3106e-20	9.16544e-19	1	1
RNASEH1	-8.84943	-4.84943	4.26785e-27	6.13778e-25	1	1
DHX33	-8.84727	-4.84727	7.03559e-29	1.28026e-26	1	1
PDE12	-8.82502	-4.82502	1.20981e-27	1.85988e-25	1	1
SPDL1	-8.82429	-4.82429	1.6273e-24	1.81372e-22	1	1
INTS8	-8.81897	-4.81897	2.35898e-19	1.39297e-17	1	1
PDCD11	-8.81458	-4.81458	1.39748e-16	5.93362e-15	1	1
RRS1	-8.80804	-4.80804	2.87821e-15	1.04963e-13	1	1
RIOK1	-8.80618	-4.80618	9.64249e-15	3.33892e-13	1	1
SUPT6H	-8.80286	-4.80286	5.63388e-16	2.20811e-14	1	1
VARS2	-8.80009	-4.80009	1.6169e-10	3.8191e-09	1	1
HK2	-8.79822	-4.79822	6.94699e-15	2.45318e-13	1	1
TGS1	-8.79797	-4.79797	5.16795e-11	1.27646e-09	1	1
EEF2	-8.78679	-4.78679	3.65623e-16	1.45865e-14	1	1
ANAPC5	-8.77495	-4.77495	1.62564e-18	8.83842e-17	1	1
KIF20A	-8.76944	-4.76944	2.94474e-16	1.18809e-14	1	1
LUC7L3	-8.76914	-4.76914	7.434e-14	2.37582e-12	1	1
ATP6V1B2	-8.7684	-4.7684	5.59419e-13	1.64895e-11	1	1
SUGP1	-8.76691	-4.76691	2.86401e-15	1.0466e-13	1	1
MRPL10	-8.76685	-4.76685	7.29609e-15	2.56124e-13	1	1
BTAF1	-8.75443	-4.75443	4.61922e-12	1.24621e-10	1	1
IARS	-8.71652	-4.71652	3.50609e-15	1.26824e-13	1	1
WDR43	-8.7126	-4.7126	8.43968e-13	2.43535e-11	1	1
MED6	-8.71108	-4.71108	3.31335e-16	1.3278e-14	1	1
AIFM1	-8.70483	-4.70483	3.51654e-23	3.37153e-21	1	1
NOP14	-8.69484	-4.69484	7.33671e-14	2.34893e-12	1	1
FARSB	-8.69061	-4.69061	2.50235e-11	6.34148e-10	1	1
SNRNP25	-8.68929	-4.68929	1.91649e-19	1.13544e-17	1	1
C16orf59	-8.68684	-4.68684	1.45022e-31	3.85996e-29	1	1
RAD51C	-8.68389	-4.68389	1.17544e-17	5.75869e-16	1	1
MED31	-8.6758	-4.6758	4.57447e-12	1.23601e-10	1	1
TTI2	-8.67062	-4.67063	3.4017e-09	7.08674e-08	1	1
MYH9	-8.66836	-4.66836	2.19604e-16	9.10745e-15	1	1
DCTN6	-8.65676	-4.65678	5.29371e-09	1.08884e-07	1	1
RBMX2	-8.64505	-4.64505	1.4684e-10	3.47295e-09	1	1
BIRC5	-8.64031	-4.64031	3.59784e-17	1.66218e-15	1	1
CTNNBL1	-8.63032	-4.63032	1.9086e-22	1.64425e-20	1	1
GET4	-8.62145	-4.62145	6.68639e-15	2.36584e-13	1	1
MTBP	-8.6195	-4.6195	3.31534e-14	1.09486e-12	1	1
PLRG1	-8.61734	-4.61734	1.50958e-11	3.9015e-10	1	1
RPL31	-8.61659	-4.61659	7.11586e-10	1.5647e-08	1	1
SF3B1	-8.61059	-4.61059	3.44824e-17	1.60137e-15	1	1
TUBGCP6	-8.593	-4.593	1.95671e-16	8.15279e-15	1	1
OST4	-8.59097	-4.59097	1.37326e-13	4.31151e-12	1	1
POLE2	-8.5898	-4.5898	1.16424e-18	6.4278e-17	1	1
TIMM50	-8.58944	-4.58944	9.03895e-22	6.91809e-20	1	1
MED21	-8.57743	-4.57743	7.96798e-13	2.30297e-11	1	1
SRBD1	-8.57393	-4.57393	6.73649e-13	1.97261e-11	1	1
ELP5	-8.55576	-4.55576	6.03296e-16	2.33435e-14	1	1
FASTKD5	-8.55538	-4.55538	7.23567e-17	3.1939e-15	1	1
RPP38	-8.55377	-4.55383	1.50132e-08	2.92602e-07	1	1
C7orf26	-8.5526	-4.5526	5.93661e-22	4.70522e-20	1	1
MAT2A	-8.54996	-4.54996	2.84086e-13	8.68973e-12	1	1
XAB2	-8.54722	-4.54722	2.4494e-14	8.21057e-13	1	1
LSM7	-8.54294	-4.54294	6.72672e-17	2.99146e-15	1	1
POLG	-8.54058	-4.54058	1.84244e-18	9.9867e-17	1	1
TUBGCP4	-8.54018	-4.54018	4.29438e-16	1.70181e-14	1	1
TRAPPC4	-8.53146	-4.53146	1.48328e-15	5.53369e-14	0.0242305	0.624799
PPWD1	-8.52843	-4.52843	5.54671e-18	2.83423e-16	1	1
PISD	-8.52596	-4.52596	2.92789e-16	1.18529e-14	1	1
SCAP	-8.51723	-4.51723	5.66359e-15	2.01193e-13	1	1
RPS9	-8.51264	-4.51264	8.34301e-18	4.19101e-16	1	1
RBMX	-8.50788	-4.50788	9.08936e-12	2.38368e-10	1	1
PRPF8	-8.50341	-4.50341	9.56025e-17	4.15824e-15	1	1
UFD1L	-8.5014	-4.5014	5.9886e-16	2.32668e-14	1	1
HSP90B1	-8.5002	-4.5002	1.41761e-23	1.40446e-21	1	1
CDC123	-8.49008	-4.49008	7.60537e-12	2.00631e-10	1	1
ZNHIT6	-8.48303	-4.48303	1.57627e-13	4.91428e-12	1	1
PFAS	-8.48158	-4.48158	1.86871e-09	3.99098e-08	1	1
NELFB	-8.4782	-4.4782	1.8802e-16	7.87081e-15	1	1
CENPE	-8.47036	-4.47036	7.44428e-16	2.86108e-14	1	1
GINS1	-8.45906	-4.45906	1.0681e-15	4.03547e-14	1	1
NCAPH2	-8.45604	-4.45604	1.23094e-21	9.1847e-20	1	1
UROD	-8.44897	-4.44897	2.30498e-14	7.741e-13	1	1
BOD1L1	-8.44539	-4.44539	1.82599e-12	5.12801e-11	1	1
ARMC7	-8.42499	-4.42499	1.35069e-12	3.82938e-11	1	1
HARS2	-8.42449	-4.42449	4.92893e-16	1.94035e-14	1	1
PNO1	-8.42248	-4.42248	1.18993e-16	5.08872e-15	1	1
XRN1	-8.41495	-4.41495	6.20947e-23	5.70791e-21	1	1
HAUS7	-8.41329	-4.41329	4.67044e-17	2.11929e-15	1	1
MTG2	-8.41255	-4.41255	1.94904e-16	8.13986e-15	1	1
NOL12	-8.39914	-4.39914	4.35872e-14	1.42361e-12	1	1
RPL15	-8.39748	-4.39748	1.76144e-10	4.1277e-09	1	1
TMX2	-8.39677	-4.39677	1.69442e-17	8.16665e-16	1	1
XRCC6	-8.38677	-4.38677	5.58374e-11	1.37725e-09	1	1
FXN	-8.38349	-4.38349	4.07024e-11	1.01517e-09	1	1
RPS28	-8.38085	-4.38085	4.21173e-10	9.55569e-09	1	1
VPS16	-8.38061	-4.38061	4.88605e-26	6.22378e-24	1	1
USP8	-8.37842	-4.37842	5.74334e-13	1.68733e-11	1	1
RPL17	-8.37088	-4.37088	2.61366e-11	6.61126e-10	1	1
MARS2	-8.3708	-4.3708	5.00003e-27	7.02091e-25	1	1
FANCM	-8.36589	-4.36589	5.79933e-19	3.27277e-17	1	1
NUFIP1	-8.3642	-4.3642	3.99725e-10	9.09222e-09	1	1
MRPS11	-8.36375	-4.36383	1.87101e-08	3.61101e-07	1	1
SF3A1	-8.35133	-4.35133	1.05594e-16	4.55948e-15	1	1
SON	-8.34938	-4.34938	1.21713e-23	1.23324e-21	1	1
MED30	-8.34163	-4.34163	1.28942e-11	3.34706e-10	1	1
RUVBL2	-8.33421	-4.33422	4.05956e-09	8.41793e-08	1	1
WDR46	-8.33215	-4.33216	6.71742e-10	1.48625e-08	1	1
TPT1	-8.33123	-4.33125	3.73423e-09	7.77043e-08	1	1
NRDE2	-8.32868	-4.32868	3.11495e-14	1.03636e-12	1	1
CCT3	-8.32788	-4.32792	8.69724e-09	1.7466e-07	1	1
POLR2C	-8.32681	-4.32681	2.16584e-14	7.31505e-13	1	1
SNF8	-8.31793	-4.31793	1.1237e-16	4.84033e-15	1	1
MRPL44	-8.3178	-4.3178	5.32302e-13	1.57422e-11	1	1
GEMIN6	-8.31553	-4.31553	1.39124e-11	3.60087e-10	1	1
MTPAP	-8.30403	-4.30403	2.67425e-11	6.7454e-10	1	1
RPS14	-8.29774	-4.29774	2.5904e-24	2.79967e-22	1	1
RPLP1	-8.29508	-4.29508	2.24017e-10	5.20168e-09	1	1
KCTD10	-8.29181	-4.29181	3.99959e-14	1.31353e-12	1	1
MRPS15	-8.28082	-4.28082	5.23937e-14	1.69264e-12	1	1
RPL23A	-8.27061	-4.27061	8.94873e-13	2.57391e-11	1	1
UBE2I	-8.26565	-4.26565	6.47493e-11	1.58609e-09	1	1
MASTL	-8.25741	-4.25741	1.40246e-21	1.03347e-19	1	1
SRP14	-8.2554	-4.2554	7.53829e-12	1.99156e-10	1	1
DHX15	-8.25421	-4.25421	2.89171e-16	1.1796e-14	1	1
TMA16	-8.24856	-4.24856	1.76273e-16	7.41385e-15	1	1
PAF1	-8.24799	-4.24799	3.0674e-13	9.30288e-12	1	1
KPNB1	-8.24097	-4.24097	4.35563e-23	4.10973e-21	1	1
UBL5	-8.23725	-4.23725	1.98632e-11	5.08207e-10	1	1
DLST	-8.23465	-4.23465	8.9384e-16	3.39869e-14	1	1
POLR2J	-8.23058	-4.23061	7.39507e-09	1.4952e-07	1	1
SDAD1	-8.22869	-4.22869	1.09335e-14	3.77864e-13	1	1
SCD	-8.22309	-4.22309	5.70535e-16	2.23122e-14	1	1
IGF1R	-8.22046	-4.22046	2.7368e-22	2.27002e-20	1	1
DKC1	-8.21366	-4.21366	3.64533e-13	1.09809e-11	1	1
SNIP1	-8.21242	-4.21251	2.12607e-08	4.08118e-07	1	1
MRPL37	-8.20889	-4.20889	4.99772e-11	1.23612e-09	1	1
PSMD11	-8.20842	-4.20851	2.20772e-08	4.23336e-07	1	1
PPP1R15B	-8.20583	-4.20584	1.28308e-09	2.77685e-08	1	1
DDX18	-8.20283	-4.20283	2.04733e-14	6.94109e-13	1	1
AARS2	-8.19658	-4.19658	5.05729e-12	1.35823e-10	1	1
DPY30	-8.19434	-4.19434	1.88008e-15	6.9415e-14	1	1
MMS19	-8.18888	-4.18888	3.50217e-10	8.01723e-09	1	1
NARS2	-8.18774	-4.18774	3.5065e-13	1.05806e-11	1	1
CDK9	-8.17727	-4.17727	6.26967e-12	1.67126e-10	1	1
RCC1	-8.17697	-4.17697	1.74835e-10	4.11324e-09	1	1
MED14	-8.17672	-4.17672	4.77989e-18	2.45673e-16	1	1
POLR1A	-8.16977	-4.16977	7.30033e-17	3.21449e-15	1	1
KIAA0391	-8.16925	-4.16925	2.77639e-20	1.83375e-18	1	1
EXOSC5	-8.16833	-4.16833	5.63958e-10	1.25871e-08	1	1
TBCC	-8.16192	-4.16196	9.11341e-09	1.82197e-07	1	1
SSRP1	-8.15873	-4.15876	7.56868e-09	1.52684e-07	1	1
TERF2	-8.15709	-4.1571	6.15311e-10	1.37161e-08	1	1
MRPS22	-8.1531	-4.1531	1.78468e-24	1.96458e-22	1	1
TEFM	-8.14548	-4.14549	1.60544e-09	3.45353e-08	1	1
CKAP5	-8.1445	-4.1445	2.07314e-26	2.80077e-24	1	1
GTF2F1	-8.13723	-4.13723	3.31813e-12	9.10341e-11	1	1
ALG2	-8.13589	-4.13589	6.18603e-12	1.65143e-10	1	1
ORAOV1	-8.13219	-4.13219	2.53007e-16	1.04441e-14	1	1
ATP6V1A	-8.12839	-4.12839	9.06468e-24	9.23717e-22	1	1
SAE1	-8.12471	-4.12471	1.41867e-13	4.44626e-12	1	1
NOC3L	-8.11902	-4.11902	1.61054e-09	3.46033e-08	1	1
EIF2B4	-8.11786	-4.11786	1.08458e-13	3.44151e-12	1	1
LONP1	-8.11586	-4.11586	5.98799e-16	2.32668e-14	1	1
EXOSC6	-8.10659	-4.10659	2.64679e-10	6.09821e-09	1	1
CSNK1A1	-8.10492	-4.10492	2.44654e-13	7.4964e-12	1	1
TRAPPC11	-8.09291	-4.09291	4.84003e-21	3.45249e-19	1	1
TUBA1B	-8.08468	-4.08469	1.94357e-09	4.1459e-08	1	1
SKIV2L2	-8.07922	-4.07922	4.86567e-26	6.22378e-24	1	1
RRP1	-8.0775	-4.07754	8.32219e-09	1.67316e-07	1	1
WNK1	-8.07706	-4.07735	6.68992e-08	1.2236e-06	1	1
CHMP6	-8.06964	-4.06964	7.93138e-15	2.76791e-13	1	1
IMP4	-8.06922	-4.06922	1.81205e-23	1.77551e-21	1	1
BANP	-8.06838	-4.06838	2.04957e-17	9.74665e-16	1	1
UTP3	-8.06468	-4.06473	1.13195e-08	2.23793e-07	1	1
TRNT1	-8.05915	-4.05915	1.48637e-15	5.53369e-14	1	1
PAFAH1B1	-8.04758	-4.04758	5.27672e-17	2.37027e-15	1	1
GTF2H1	-8.04727	-4.04727	5.05736e-15	1.80016e-13	1	1
TCP1	-8.04703	-4.04704	1.9697e-09	4.19661e-08	1	1
DIDO1	-8.04521	-4.04521	1.98649e-20	1.33177e-18	1	1
TSR2	-8.04512	-4.04512	4.54245e-10	1.02539e-08	1	1
GTF2A2	-8.04179	-4.04179	1.35812e-10	3.23355e-09	1	1
ABCE1	-8.04078	-4.04078	8.98309e-10	1.968e-08	1	1
MRPS5	-8.03894	-4.03907	2.88396e-08	5.4829e-07	1	1
RAD17	-8.03822	-4.03822	2.58353e-23	2.5176e-21	1	1
INTS10	-8.03785	-4.03785	2.02256e-11	5.16738e-10	1	1
NCL	-8.0354	-4.0354	1.27774e-10	3.05441e-09	1	1
MRPS30	-8.02429	-4.02429	8.07155e-10	1.77048e-08	1	1
TAF11	-8.01787	-4.01795	1.84798e-08	3.5743e-07	1	1
ACTR1A	-8.01507	-4.01507	4.7111e-10	1.0581e-08	1	1
SMG7	-8.01077	-4.01077	6.34663e-15	2.25009e-13	1	1
MRPL39	-8.00635	-4.00638	7.73874e-09	1.55938e-07	1	1
PSMA7	-8.00469	-4.0047	3.1934e-09	6.68403e-08	1	1
CCDC51	-7.99363	-3.99363	4.28029e-22	3.45386e-20	1	1
ZC3H18	-7.99008	-3.99008	7.81987e-12	2.05985e-10	1	1
CDAN1	-7.98801	-3.98801	2.47131e-11	6.27791e-10	1	1
SMG6	-7.98664	-3.98665	1.09743e-10	2.63399e-09	1	1
CDK12	-7.94968	-3.94971	6.57976e-09	1.34158e-07	1	1
LENG1	-7.94666	-3.94668	5.64356e-09	1.1568e-07	1	1
COX15	-7.9312	-3.9312	1.38848e-15	5.21278e-14	1	1
DOLK	-7.93052	-3.93052	5.16508e-17	2.32598e-15	1	1
NDC1	-7.92551	-3.92551	1.46456e-16	6.20368e-15	1	1
RPS12	-7.92303	-3.92316	2.81978e-08	5.3666e-07	1	1
CYB5B	-7.91301	-3.91303	2.57111e-09	5.4133e-08	1	1
COG5	-7.91259	-3.91259	5.30925e-10	1.18741e-08	1	1
PFDN5	-7.90653	-3.90653	2.19504e-10	5.10354e-09	1	1
C9orf114	-7.87669	-3.8767	4.27614e-10	9.68951e-09	1	1
DCTN4	-7.86095	-3.86095	3.45082e-16	1.37978e-14	1	1
IMMT	-7.85704	-3.85704	4.04646e-11	1.01065e-09	0.0645625	0.813089
SLBP	-7.85629	-3.85629	7.92643e-12	2.08484e-10	1	1
COA3	-7.85387	-3.85409	4.91354e-08	9.12742e-07	1	1
UTP20	-7.85144	-3.85144	9.46212e-13	2.70848e-11	1	1
BYSL	-7.84928	-3.84928	3.99654e-12	1.08644e-10	1	1
ESCO2	-7.8473	-3.8473	4.13549e-14	1.35567e-12	1	1
ELAVL1	-7.84024	-3.84024	7.55507e-18	3.82755e-16	1	1
UBE3D	-7.83803	-3.83803	2.84847e-13	8.69692e-12	1	1
TOMM40	-7.83338	-3.83338	7.64182e-18	3.86052e-16	1	1
CD2BP2	-7.82343	-3.82343	6.53746e-20	4.07631e-18	1	1
POLG2	-7.81845	-3.81847	4.51384e-09	9.3166e-08	1	1
ADSL	-7.8088	-3.80886	1.26485e-08	2.48688e-07	1	1
PSMD12	-7.79976	-3.79976	1.36704e-13	4.29953e-12	1	1
CDC7	-7.7993	-3.7993	6.80223e-11	1.65943e-09	1	1
WDR3	-7.79871	-3.79873	4.35931e-09	9.00806e-08	0.728574	1
COASY	-7.79354	-3.79359	1.21627e-08	2.39666e-07	1	1
SEC13	-7.79231	-3.79231	1.36011e-24	1.5548e-22	1	1
ZER1	-7.79037	-3.79037	7.31409e-13	2.12777e-11	1	1
MZT1	-7.77544	-3.77544	3.87582e-16	1.53937e-14	1	1
GUK1	-7.77239	-3.77239	2.04948e-15	7.55132e-14	1	1
ARIH1	-7.7664	-3.76644	1.00412e-08	1.99626e-07	1	1
EXOSC2	-7.76481	-3.76481	9.44117e-25	1.10766e-22	1	1
NHP2	-7.76174	-3.76177	7.5237e-09	1.51948e-07	1	1
NUBP2	-7.75146	-3.75146	6.52851e-12	1.73507e-10	1	1
ALG11	-7.74757	-3.74758	3.19874e-09	6.68735e-08	1	1
ARF4	-7.74521	-3.74521	1.19105e-13	3.7593e-12	1	1
NAPG	-7.74119	-3.74119	7.21769e-15	2.53872e-13	1	1
INCENP	-7.72989	-3.72989	1.97265e-20	1.33091e-18	1	1
NRBP1	-7.72271	-3.72271	2.5931e-19	1.51619e-17	1	1
VBP1	-7.72267	-3.72317	1.13384e-07	2.024e-06	1	1
RPS26	-7.72158	-3.72158	3.31842e-22	2.73969e-20	1	1
SLC25A26	-7.71677	-3.71677	3.17601e-13	9.61592e-12	1	1
PPCS	-7.7086	-3.7086	7.40823e-15	2.5955e-13	1	1
POLR3H	-7.7026	-3.7026	1.0305e-09	2.24932e-08	1	1
CCNK	-7.6911	-3.69115	1.08585e-08	2.14916e-07	1	1
NPLOC4	-7.68936	-3.68936	2.93115e-16	1.18529e-14	1	1
TOMM20	-7.68791	-3.68791	5.89187e-16	2.29912e-14	1	1
RFC4	-7.68493	-3.68493	1.68596e-13	5.23793e-12	1	1
MRPL19	-7.68304	-3.68304	1.2004e-14	4.12463e-13	1	1
HINFP	-7.6807	-3.6807	2.66663e-10	6.136e-09	1	1
NUP93	-7.67447	-3.67447	6.44223e-11	1.58025e-09	1	1
WDR36	-7.67091	-3.67091	2.24364e-21	1.61334e-19	1	1
SEC16A	-7.67037	-3.67037	4.78038e-18	2.45673e-16	1	1
HNRNPU	-7.66812	-3.66812	8.79832e-15	3.05254e-13	1	1
KRI1	-7.66745	-3.66745	1.39356e-12	3.94466e-11	1	1
BUB1B	-7.6651	-3.66511	2.79311e-09	5.86684e-08	1	1
CENPU	-7.66131	-3.66131	6.85853e-13	1.9985e-11	1	1
COA5	-7.65676	-3.65703	6.23211e-08	1.14693e-06	1	1
WDR92	-7.65142	-3.65142	3.73354e-16	1.48617e-14	1	1
BUB1	-7.65136	-3.65136	4.98048e-11	1.23357e-09	1	1
ISY1-RAB43	-7.64763	-3.64781	4.06784e-08	7.62794e-07	0.707644	1
TBCD	-7.64552	-3.64552	6.87325e-17	3.04902e-15	1	1
RFT1	-7.63713	-3.63713	3.18679e-10	7.31404e-09	1	1
CDC6	-7.62788	-3.62788	9.51848e-13	2.72024e-11	1	1
MRPS2	-7.62226	-3.62226	1.21599e-12	3.45848e-11	1	1
ATP5L	-7.62071	-3.62071	3.96698e-15	1.42341e-13	1	1
ANAPC11	-7.61764	-3.61776	2.90387e-08	5.50901e-07	1	1
EARS2	-7.61248	-3.61252	8.9423e-09	1.79178e-07	1	1
RRP36	-7.61121	-3.61121	1.24937e-16	5.33017e-15	1	1
COG8	-7.5985	-3.5985	5.53158e-12	1.48338e-10	1	1
WDHD1	-7.59832	-3.59832	2.34874e-15	8.60062e-14	1	1
YARS	-7.59758	-3.59758	1.93369e-17	9.24488e-16	1	1
GATC	-7.58869	-3.58869	4.22679e-14	1.38305e-12	1	1
PSMC4	-7.58771	-3.588	6.63498e-08	1.21605e-06	1	1
WDR83	-7.58172	-3.58172	2.88503e-25	3.57283e-23	1	1
PSMC6	-7.57834	-3.57834	6.02004e-20	3.79348e-18	1	1
NSL1	-7.57417	-3.57417	8.76208e-13	2.5243e-11	1	1
SEC63	-7.57348	-3.57351	6.58266e-09	1.34158e-07	1	1
PSMB7	-7.56872	-3.56872	2.11353e-14	7.15193e-13	1	1
PAXBP1	-7.56838	-3.56838	4.64101e-10	1.04367e-08	1	1
YRDC	-7.56547	-3.56548	2.74375e-09	5.76997e-08	1	1
TBL3	-7.56344	-3.56344	2.85784e-13	8.69692e-12	1	1
SRSF11	-7.55992	-3.55992	8.96621e-13	2.57479e-11	1	1
PHAX	-7.55904	-3.55969	1.49833e-07	2.64028e-06	1	1
RPP40	-7.55683	-3.55683	9.65939e-16	3.66502e-14	1	1
PSMB6	-7.55515	-3.55524	2.03235e-08	3.90549e-07	1	1
GPN3	-7.54024	-3.54024	1.16762e-13	3.69186e-12	1	1
CCT4	-7.53706	-3.53706	4.58933e-15	1.64341e-13	1	1
EIF2S3	-7.537	-3.53776	1.74318e-07	3.05065e-06	1	1
WRB	-7.5325	-3.5325	6.58899e-16	2.54332e-14	1	1
TNPO1	-7.49334	-3.49334	1.69713e-15	6.27903e-14	1	1
RRP9	-7.49133	-3.49133	6.03754e-17	2.69168e-15	1	1
NR2C2AP	-7.48517	-3.48517	2.10426e-13	6.50351e-12	1	1
BRAT1	-7.48498	-3.48498	3.64704e-14	1.19996e-12	1	1
TTC27	-7.48443	-3.48443	4.60762e-14	1.49668e-12	1	1
ANLN	-7.48339	-3.48339	2.44558e-13	7.4964e-12	1	1
RBBP4	-7.48277	-3.48278	6.95863e-10	1.53581e-08	1	1
BRCA1	-7.48099	-3.48124	5.86451e-08	1.08375e-06	1	1
MOB4	-7.46766	-3.46846	1.83634e-07	3.2074e-06	1	1
DDX56	-7.46542	-3.46542	4.78202e-12	1.28624e-10	1	1
TRAPPC3	-7.45316	-3.45316	1.59546e-14	5.46101e-13	1	1
NAPA	-7.44925	-3.44925	2.71834e-16	1.11696e-14	1	1
HSF1	-7.44609	-3.44609	1.51492e-21	1.10719e-19	1	1
PSMB1	-7.44372	-3.44372	6.30542e-14	2.03336e-12	1	1
CIT	-7.44094	-3.44094	3.9811e-12	1.08389e-10	1	1
MVD	-7.44016	-3.44047	7.12245e-08	1.29872e-06	1	1
PGS1	-7.42772	-3.42816	1.02827e-07	1.8485e-06	1	1
EIF1AX	-7.42729	-3.42729	4.86449e-15	1.73497e-13	1	1
NEDD8-MDP1	-7.42266	-3.42273	1.74822e-08	3.39238e-07	1	1
SYF2	-7.4186	-3.41866	1.41693e-08	2.77367e-07	1	1
GTF3C4	-7.41504	-3.41504	8.79609e-14	2.79609e-12	1	1
NXF1	-7.41361	-3.41361	1.03425e-16	4.47664e-15	1	1
SASS6	-7.41109	-3.41172	1.45223e-07	2.56158e-06	1	1
SCAF8	-7.40971	-3.40971	1.24508e-18	6.83185e-17	1	1
PPP1R11	-7.40849	-3.4092	1.63779e-07	2.8775e-06	1	1
TRNAU1AP	-7.40666	-3.40666	1.03054e-24	1.20116e-22	1	1
DBR1	-7.40602	-3.40656	1.24097e-07	2.20421e-06	1	1
CTU2	-7.40485	-3.40485	4.72453e-17	2.13298e-15	1	1
UBTF	-7.39991	-3.39991	1.58141e-17	7.64262e-16	1	1
RPL17-C18orf32	-7.3961	-3.39654	1.00885e-07	1.81726e-06	1	1
PITRM1	-7.39329	-3.39329	3.79158e-13	1.1383e-11	1	1
ASH2L	-7.38985	-3.38985	4.22166e-12	1.14589e-10	1	1
TCEB2	-7.38983	-3.39219	5.44631e-07	8.95698e-06	1	1
ELAC2	-7.38649	-3.38652	6.85236e-09	1.39496e-07	0.90965	1
POLA2	-7.38468	-3.38468	4.51676e-18	2.33471e-16	1	1
USPL1	-7.38207	-3.38255	1.12205e-07	2.00698e-06	1	1
AASDHPPT	-7.38062	-3.38062	2.79694e-12	7.72103e-11	1	1
ATP5O	-7.37935	-3.37935	5.84525e-13	1.71445e-11	1	1
PMF1	-7.378	-3.378	1.68583e-15	6.2502e-14	1	1
DGCR14	-7.36912	-3.37173	6.03559e-07	9.89272e-06	1	1
TARDBP	-7.3579	-3.35791	1.48552e-09	3.20718e-08	1	1
TKT	-7.35466	-3.35468	5.72278e-09	1.17035e-07	1	1
TBCB	-7.34816	-3.34816	6.31923e-14	2.03413e-12	1	1
RPS15A	-7.34803	-3.34846	9.88704e-08	1.78638e-06	1	1
MCMBP	-7.3377	-3.3377	2.53139e-14	8.45362e-13	1	1
SF3B3	-7.33061	-3.332	3.21176e-07	5.4652e-06	1	1
NDC80	-7.32952	-3.32952	3.10836e-15	1.13125e-13	1	1
ERH	-7.32869	-3.3287	2.0539e-09	4.36559e-08	1	1
C14orf80	-7.32779	-3.32779	2.74191e-17	1.28001e-15	1	1
MED26	-7.32696	-3.32702	1.49405e-08	2.91504e-07	1	1
NUP54	-7.31704	-3.31718	3.2813e-08	6.20524e-07	1	1
DHX9	-7.3115	-3.31199	1.1293e-07	2.01792e-06	1	1
FAM32A	-7.31129	-3.31215	1.97661e-07	3.43221e-06	1	1
SNRNP200	-7.31076	-3.31076	3.64188e-15	1.31469e-13	1	1
SMARCB1	-7.30087	-3.30348	6.02368e-07	9.88227e-06	1	1
PABPN1	-7.29931	-3.29993	1.43433e-07	2.54006e-06	1	1
GGPS1	-7.29571	-3.29571	4.44303e-10	1.00549e-08	1	1
ISCU	-7.29116	-3.29116	7.57108e-19	4.23245e-17	1	1
ZMAT2	-7.2897	-3.28974	9.55516e-09	1.90388e-07	1	1
VPS37A	-7.28686	-3.28686	2.96927e-16	1.19528e-14	1	1
ANAPC15	-7.28432	-3.28432	2.85492e-13	8.69692e-12	1	1
AARS	-7.28258	-3.28264	1.4162e-08	2.77367e-07	1	1
SMU1	-7.27455	-3.27455	4.69202e-13	1.39688e-11	1	1
INSIG1	-7.27195	-3.27195	8.79606e-21	6.2e-19	1	1
IRS2	-7.26715	-3.26716	3.92472e-10	8.93865e-09	1	1
MRPL21	-7.26677	-3.26679	4.2205e-09	8.73134e-08	1	1
LARS2	-7.26625	-3.26626	1.81555e-09	3.88209e-08	1	1
STX5	-7.26117	-3.26421	7.02018e-07	1.13706e-05	1	1
DNM1L	-7.25858	-3.2586	5.53081e-09	1.1363e-07	1	1
ATXN7L3	-7.25267	-3.25267	7.59015e-13	2.2009e-11	1	1
ATP1A1	-7.25191	-3.25191	3.26667e-14	1.08079e-12	1	1
ACTL6A	-7.25141	-3.25141	2.02076e-14	6.86404e-13	0.708204	1
QARS	-7.24905	-3.24941	8.16413e-08	1.4826e-06	1	1
CENPK	-7.249	-3.249	1.49898e-13	4.68969e-12	1	1
PSMD4	-7.22936	-3.22936	6.82275e-13	1.99459e-11	1	1
CFDP1	-7.22783	-3.2357	1.82837e-06	2.80114e-05	1	1
MAD2L1BP	-7.22603	-3.22603	4.24474e-13	1.26583e-11	1	1
RPL7L1	-7.21978	-3.21978	8.24905e-15	2.86755e-13	1	1
CHERP	-7.21919	-3.21919	1.52575e-11	3.93758e-10	1	1
ZPR1	-7.21455	-3.21455	1.75867e-10	4.12662e-09	1	1
ZNF407	-7.21191	-3.21373	4.20451e-07	7.02709e-06	1	1
RPL12	-7.20818	-3.20818	3.16468e-15	1.1494e-13	1	1
RPL14	-7.19618	-3.1967	1.18608e-07	2.11091e-06	1	1
NFIC	-7.18641	-3.18641	6.03452e-16	2.33435e-14	1	1
OXSR1	-7.1863	-3.1863	1.04785e-11	2.73992e-10	1	1
METTL3	-7.18534	-3.18715	4.17148e-07	6.97843e-06	1	1
MCUR1	-7.18437	-3.18437	1.85445e-12	5.19975e-11	1	1
MARS	-7.18315	-3.18315	2.40005e-12	6.64599e-11	1	1
RPL32	-7.1826	-3.18281	4.78322e-08	8.90388e-07	1	1
RBBP8	-7.17997	-3.18307	7.1633e-07	1.15919e-05	1	1
DARS2	-7.17896	-3.17896	8.50505e-14	2.7084e-12	1	1
CCDC130	-7.17638	-3.17638	1.45838e-10	3.45382e-09	1	1
DYNC1LI2	-7.17613	-3.17613	3.63982e-17	1.67723e-15	1	1
RPSA	-7.17221	-3.17235	3.16599e-08	5.99354e-07	1	1
NDOR1	-7.16971	-3.17724	1.74849e-06	2.68752e-05	1	1
MRPS9	-7.16375	-3.16375	1.17625e-11	3.06221e-10	0.313174	1
SLC33A1	-7.16255	-3.16255	4.77368e-12	1.28594e-10	1	1
TIMM9	-7.16042	-3.16042	2.29905e-14	7.73566e-13	1	1
RNF168	-7.15626	-3.15626	2.60368e-23	2.52344e-21	1	1
TFDP1	-7.15157	-3.15157	1.81045e-11	4.65884e-10	1	1
NOP2	-7.142	-3.142	4.60503e-10	1.03689e-08	1	1
RPS27A	-7.14006	-3.14006	6.17859e-12	1.65143e-10	1	1
N6AMT1	-7.13323	-3.13323	1.24013e-17	6.04244e-16	1	1
DDX49	-7.1307	-3.1324	3.91869e-07	6.58022e-06	1	1
OTUD5	-7.1277	-3.1277	1.31567e-13	4.14528e-12	1	1
LAGE3	-7.11661	-3.11661	3.35477e-12	9.18979e-11	1	1
MCAT	-7.11424	-3.11424	1.20196e-09	2.60444e-08	1	1
DNAJC8	-7.11157	-3.11157	2.21799e-12	6.17041e-11	1	1
EXOSC9	-7.10964	-3.10964	3.40036e-11	8.52864e-10	1	1
RRM2	-7.10643	-3.10643	6.84105e-12	1.81272e-10	1	1
CCNH	-7.1021	-3.1021	1.41511e-15	5.3016e-14	1	1
DHDDS	-7.09656	-3.0966	9.12669e-09	1.82258e-07	1	1
WDR75	-7.08939	-3.08939	1.46325e-15	5.47046e-14	1	1
FARSA	-7.08847	-3.08847	2.08791e-10	4.86714e-09	1	1
ASNA1	-7.08719	-3.08743	5.65965e-08	1.04698e-06	1	1
RRN3	-7.08605	-3.08605	1.69276e-10	3.98772e-09	1	1
FAM96B	-7.08253	-3.08254	1.13033e-09	2.45519e-08	1	1
NUP43	-7.08089	-3.08089	4.23334e-12	1.14731e-10	1	1
PRCC	-7.07629	-3.0828	1.51109e-06	2.3412e-05	1	1
DMAP1	-7.0702	-3.0702	6.83456e-13	1.99477e-11	1	1
RAD9A	-7.06993	-3.06993	3.72944e-13	1.12154e-11	1	1
E4F1	-7.0685	-3.0685	3.17839e-14	1.0555e-12	1	1
URM1	-7.06821	-3.06828	1.51932e-08	2.95787e-07	1	1
DDX51	-7.06531	-3.06645	2.63247e-07	4.52262e-06	1	1
TP53RK	-7.06086	-3.06113	6.07877e-08	1.12102e-06	1	1
NOL10	-7.05969	-3.05969	2.91519e-16	1.1842e-14	1	1
PPP1R35	-7.04632	-3.05067	1.00581e-06	1.60417e-05	1	1
TAZ	-7.04354	-3.04354	4.61876e-15	1.65063e-13	1	1
CTR9	-7.04266	-3.04853	1.35923e-06	2.11881e-05	1	1
BCS1L	-7.04191	-3.04191	4.53957e-14	1.47727e-12	1	1
MRPS18A	-7.03877	-3.03883	1.33236e-08	2.61385e-07	1	1
DDX54	-7.03591	-3.03601	2.21272e-08	4.2384e-07	1	1
GLRX5	-7.03136	-3.03136	2.12164e-13	6.54589e-12	1	1
ITPK1	-7.03011	-3.03178	3.85162e-07	6.48592e-06	1	1
CCDC174	-7.02911	-3.02911	4.09647e-13	1.22777e-11	1	1
TONSL	-7.02741	-3.0297	5.28408e-07	8.71702e-06	1	1
RFC2	-7.0231	-3.0276	1.04077e-06	1.65714e-05	1	1
NAA25	-7.0177	-3.0242	1.50804e-06	2.3385e-05	1	1
RBM25	-7.01553	-3.01558	1.26214e-08	2.48431e-07	1	1
PARS2	-7.01512	-3.01512	1.24022e-12	3.52179e-11	1	1
KDM8	-7.01375	-3.01375	4.45831e-12	1.20645e-10	1	1
DDX52	-7.00835	-3.0105	4.95665e-07	8.21486e-06	1	1
RPAIN	-6.99534	-2.99534	1.17073e-15	4.41387e-14	1	1
MRPL43	-6.99502	-2.99561	1.36232e-07	2.41493e-06	1	1
RPUSD4	-6.99309	-2.99869	1.29949e-06	2.02923e-05	1	1
EMC4	-6.992	-2.992	8.14654e-14	2.59888e-12	1	1
ELP6	-6.99011	-2.99154	3.30629e-07	5.61533e-06	0.762548	1
GRPEL1	-6.98659	-2.98659	2.4324e-10	5.62608e-09	1	1
SPCS2	-6.98243	-2.98287	1.01046e-07	1.81831e-06	1	1
DNAAF2	-6.98103	-2.98103	1.36183e-10	3.23807e-09	1	1
OXA1L	-6.97977	-2.97977	2.17426e-12	6.05836e-11	1	1
YEATS2	-6.97966	-2.97966	4.69963e-14	1.52379e-12	1	1
SPATA5L1	-6.97477	-2.97477	5.94261e-11	1.46172e-09	1	1
SRCAP	-6.97465	-2.97465	6.44361e-14	2.07043e-12	1	1
MRGBP	-6.97376	-2.97376	2.62575e-11	6.63243e-10	1	1
VPRBP	-6.95886	-2.95886	2.52392e-12	6.97816e-11	1	1
REV3L	-6.95725	-2.95921	4.53233e-07	7.51861e-06	1	1
ZBTB8OS	-6.95661	-2.95662	3.36981e-09	7.02852e-08	1	1
NUDC	-6.95277	-2.95366	2.05344e-07	3.56216e-06	1	1
RNGTT	-6.95263	-2.95388	2.86721e-07	4.89291e-06	1	1
CLSPN	-6.95082	-2.95082	6.553e-12	1.73898e-10	1	1
ACIN1	-6.94785	-2.94785	2.2819e-11	5.805e-10	1	1
NCAPD3	-6.94699	-2.94837	3.18271e-07	5.42093e-06	1	1
VCP	-6.946	-2.946	1.03e-11	2.6972e-10	1	1
CNOT3	-6.93952	-2.93952	3.30231e-13	9.98138e-12	1	1
ZBTB17	-6.9339	-2.93615	5.19941e-07	8.58528e-06	1	1
TRIM33	-6.93323	-2.93323	1.98754e-22	1.70403e-20	1	1
TSG101	-6.93298	-2.93298	9.60996e-23	8.65528e-21	1	1
RPAP2	-6.92655	-2.92683	6.34572e-08	1.16663e-06	1	1
NAA50	-6.92107	-2.92215	2.48187e-07	4.27211e-06	1	1
MRPL53	-6.91839	-2.91852	3.08662e-08	5.8495e-07	1	1
COA6	-6.90342	-2.90407	1.50739e-07	2.65364e-06	1	1
PRPF4	-6.89914	-2.89914	2.06176e-11	5.25248e-10	1	1
KAT8	-6.89905	-2.90395	1.13451e-06	1.7936e-05	1	1
RNASEK	-6.89353	-2.90362	2.35125e-06	3.52945e-05	1	1
TRAIP	-6.888	-2.888	2.18133e-13	6.71841e-12	1	1
ING3	-6.88796	-2.88796	3.89428e-10	8.88064e-09	1	1
ATP6V1D	-6.88598	-2.88921	7.46782e-07	1.20628e-05	1	1
GNL3L	-6.88105	-2.88669	1.30764e-06	2.04017e-05	1	1
EIF2S2	-6.87932	-2.88225	6.76728e-07	1.10077e-05	1	1
ATP5D	-6.87722	-2.87863	3.23517e-07	5.49979e-06	1	1
RAD51D	-6.87676	-2.87739	1.45165e-07	2.56158e-06	1	1
PKMYT1	-6.87494	-2.87651	3.63681e-07	6.1416e-06	1	1
DDX55	-6.87424	-2.87424	1.73947e-11	4.48266e-10	1	1
NEDD1	-6.87299	-2.87906	1.40757e-06	2.19033e-05	1	1
COG4	-6.86917	-2.86917	2.11955e-12	5.92444e-11	1	1
DDX21	-6.86384	-2.86384	1.87898e-11	4.81435e-10	1	1
HUWE1	-6.86261	-2.89468	7.66445e-06	0.000107453	1	1
MCM7	-6.86253	-2.86321	1.56155e-07	2.74626e-06	0.0975169	0.928468
NLE1	-6.86021	-2.86291	6.23989e-07	1.01994e-05	1	1
SPC25	-6.86012	-2.86028	3.68785e-08	6.95931e-07	1	1
ERCC2	-6.85707	-2.85707	2.46812e-14	8.25777e-13	1	1
TELO2	-6.85102	-2.85102	2.50345e-11	6.34148e-10	1	1
SUGT1	-6.84465	-2.84465	7.87565e-13	2.27997e-11	1	1
PSMC5	-6.84431	-2.84594	3.77212e-07	6.35806e-06	1	1
CDC23	-6.84321	-2.84321	9.35967e-11	2.26167e-09	1	1
DNAJA1	-6.84305	-2.85347	2.4289e-06	3.63377e-05	1	1
EEF1G	-6.83299	-2.8342	2.78883e-07	4.76371e-06	1	1
CWC15	-6.8327	-2.83329	1.35677e-07	2.4075e-06	1	1
HAUS5	-6.8296	-2.8352	1.29927e-06	2.02923e-05	1	1
OSGEP	-6.82867	-2.82903	8.24162e-08	1.49515e-06	1	1
MED27	-6.82796	-2.82796	6.63168e-10	1.4691e-08	1	1
ERAL1	-6.82207	-2.82379	3.97054e-07	6.66102e-06	1	1
BORA	-6.81964	-2.81964	4.13108e-13	1.23607e-11	1	1
SMARCD1	-6.81722	-2.82223	1.16047e-06	1.83139e-05	1	1
STT3B	-6.81697	-2.81697	1.85108e-14	6.29968e-13	1	1
MED8	-6.81598	-2.81599	6.75894e-10	1.49358e-08	1	1
TRMT5	-6.8126	-2.81277	4.02051e-08	7.54713e-07	1	1
GCN1	-6.80587	-2.80587	3.05627e-16	1.22753e-14	1	1
PARG	-6.80462	-2.80462	2.1077e-12	5.90057e-11	1	1
UBR4	-6.80304	-2.82068	4.14635e-06	6.03115e-05	1	1
AZIN1	-6.80075	-2.80306	5.33261e-07	8.78083e-06	1	1
CTC1	-6.79189	-2.7995	1.76744e-06	2.71245e-05	1	1
DHX37	-6.79059	-2.8054	3.46785e-06	5.09409e-05	1	1
WDR61	-6.78633	-2.78633	4.61491e-16	1.82074e-14	1	1
IMP3	-6.78278	-2.78278	1.05483e-15	3.99381e-14	1	1
PPP2R1A	-6.78201	-2.78235	7.65944e-08	1.39378e-06	1	1
NUP153	-6.77955	-2.79054	2.56264e-06	3.81784e-05	1	1
ATRIP	-6.77788	-2.77799	2.75232e-08	5.24382e-07	1	1
ESPL1	-6.77317	-2.78053	1.70913e-06	2.63202e-05	1	1
ZNF808	-6.76834	-2.77342	1.17777e-06	1.85376e-05	1	1
TSEN15	-6.76586	-2.76649	1.45076e-07	2.56158e-06	1	1
CUL2	-6.76212	-2.76212	7.14843e-10	1.56993e-08	1	1
NUP62	-6.75138	-2.75138	1.80595e-14	6.15786e-13	1	1
PPP2R3C	-6.74518	-2.7485	7.68596e-07	1.23927e-05	1	1
ALG1L2	-6.74462	-2.75952	3.49025e-06	5.12277e-05	1	1
FH	-6.74296	-2.74296	6.66052e-11	1.62708e-09	1	1
TACC3	-6.72814	-2.7291	2.20671e-07	3.82431e-06	1	1
FURIN	-6.72583	-2.72583	2.23109e-14	7.52118e-13	1	1
GTF3C5	-6.71881	-2.71915	7.93375e-08	1.44223e-06	1	1
QRICH1	-6.71587	-2.71587	4.16886e-13	1.24528e-11	1	1
CXorf56	-6.71207	-2.71237	6.97993e-08	1.27403e-06	1	1
SMNDC1	-6.70942	-2.70942	2.47336e-10	5.71339e-09	1	1
RPL9	-6.70759	-2.74724	9.55964e-06	0.000132564	1	1
PCID2	-6.70694	-2.70694	2.79347e-10	6.41957e-09	1	1
NFE2L1	-6.70681	-2.73481	6.65888e-06	9.43191e-05	1	1
ZNF511	-6.70641	-2.70648	1.71398e-08	3.33319e-07	1	1
POLR3A	-6.70563	-2.70563	1.75304e-10	4.11884e-09	1	1
PMPCA	-6.70408	-2.70408	2.91374e-11	7.32873e-10	1	1
RPL34	-6.69997	-2.7029	6.77143e-07	1.10077e-05	1	1
TADA1	-6.69719	-2.69719	3.28857e-11	8.25987e-10	1	1
ZBTB11	-6.69453	-2.69535	1.89696e-07	3.3068e-06	1	1
C19orf53	-6.69451	-2.69457	1.31542e-08	2.58346e-07	1	1
CNOT11	-6.68992	-2.69064	1.65907e-07	2.91203e-06	1	1
GART	-6.68945	-2.6896	3.53557e-08	6.67901e-07	1	1
TIPIN	-6.68749	-2.68749	5.0511e-14	1.63478e-12	1	1
KANSL1	-6.68725	-2.68726	1.06754e-09	2.32448e-08	1	1
KIF18A	-6.68421	-2.68421	3.45018e-11	8.64144e-10	1	1
ATP6V0D1	-6.67656	-2.67932	6.35882e-07	1.03843e-05	1	1
HAUS4	-6.67455	-2.70112	6.30713e-06	8.96216e-05	1	1
VHL	-6.67423	-2.67423	4.70668e-13	1.3989e-11	1	1
SDE2	-6.67401	-2.6802	1.43511e-06	2.23124e-05	1	1
NFIA	-6.67378	-2.67378	4.20112e-11	1.04635e-09	1	1
SKP2	-6.67261	-2.6958	5.48466e-06	7.84346e-05	1	1
ZMAT5	-6.66872	-2.67151	6.45014e-07	1.05142e-05	1	1
TINF2	-6.66219	-2.66717	1.15288e-06	1.82102e-05	1	1
SHQ1	-6.65711	-2.67649	4.56406e-06	6.59569e-05	1	1
MRPL47	-6.65535	-2.65692	3.6201e-07	6.11917e-06	1	1
SNAPC3	-6.65292	-2.6548	4.33512e-07	7.22507e-06	1	1
LSM4	-6.65282	-2.65558	6.37587e-07	1.04026e-05	1	1
PTCD3	-6.647	-2.6482	2.75473e-07	4.70998e-06	1	1
CEP135	-6.64691	-2.67783	7.37988e-06	0.00010379	1	1
NUP155	-6.64664	-2.64664	2.28041e-13	7.01146e-12	1	1
KIF23	-6.6422	-2.67547	7.96224e-06	0.000111453	1	1
RPL28	-6.63725	-2.63725	5.69366e-12	1.52455e-10	1	1
HUS1	-6.63619	-2.63619	6.38443e-10	1.41962e-08	1	1
DHX16	-6.61749	-2.61749	1.54591e-13	4.82806e-12	1	1
CHMP2A	-6.60472	-2.60472	1.136e-12	3.23615e-11	1	1
SMC2	-6.6046	-2.61458	2.32531e-06	3.49346e-05	1	1
ANAPC2	-6.60431	-2.6146	2.3989e-06	3.59795e-05	1	1
DARS	-6.60311	-2.60478	3.85902e-07	6.49226e-06	1	1
REXO2	-6.60225	-2.60225	4.44848e-14	1.45027e-12	1	1
ATP6V1H	-6.6017	-2.60923	1.74968e-06	2.68752e-05	0.225605	1
NDUFB4	-6.60068	-2.60068	1.31871e-11	3.41811e-10	1	1
SAP18	-6.59557	-2.60838	2.99462e-06	4.42079e-05	1	1
ABCF1	-6.59487	-2.60958	3.44698e-06	5.0676e-05	1	1
SNAPC4	-6.59369	-2.59369	1.23058e-10	2.94563e-09	1	1
VPS28	-6.59196	-2.59196	3.48096e-10	7.97892e-09	1	1
POLR3F	-6.58675	-2.58675	1.36418e-10	3.23933e-09	1	1
NOP10	-6.58177	-2.58969	1.84034e-06	2.81706e-05	1	1
LAMTOR3	-6.58154	-2.60761	6.18619e-06	8.80433e-05	1	1
U2SURP	-6.58064	-2.58858	1.84685e-06	2.8246e-05	1	1
BANF1	-6.57458	-2.58539	2.5191e-06	3.7624e-05	1	1
OSBP	-6.56869	-2.59011	5.05705e-06	7.24939e-05	1	1
CDK11B	-6.56791	-2.57254	1.07345e-06	1.70613e-05	1	1
IKBKAP	-6.56708	-2.56708	1.93983e-10	4.52788e-09	1	1
SAMM50	-6.56586	-2.56586	1.70175e-12	4.78665e-11	1	1
MRPS24	-6.56458	-2.57106	1.50241e-06	2.33181e-05	1	1
SEC61A1	-6.55291	-2.55291	6.41666e-12	1.70789e-10	1	1
SEH1L	-6.55247	-2.55383	3.14527e-07	5.3623e-06	1	1
SNRPD2	-6.55069	-2.55817	1.73835e-06	2.67473e-05	1	1
MRPS25	-6.53796	-2.53796	1.09515e-10	2.63204e-09	1	1
C21orf59	-6.52775	-2.52775	1.81617e-11	4.66683e-10	1	1
GSG2	-6.5077	-2.50779	1.99328e-08	3.83453e-07	1	1
ATP5F1	-6.5011	-2.54622	1.09491e-05	0.000150544	1	1
TPI1	-6.49946	-2.49946	5.3524e-13	1.58029e-11	1	1
MRPL46	-6.49728	-2.49811	1.90775e-07	3.32236e-06	1	1
SMG5	-6.49379	-2.51403	4.77119e-06	6.87275e-05	1	1
EIF3F	-6.49367	-2.51511	5.06131e-06	7.24967e-05	1	1
EIF4B	-6.49362	-2.51723	5.58685e-06	7.98319e-05	1	1
RPL37A	-6.4878	-2.48789	1.94294e-08	3.74174e-07	1	1
ZNF207	-6.48707	-2.48707	4.57043e-10	1.0304e-08	0.32514	1
RBBP6	-6.4817	-2.4817	6.81345e-11	1.65989e-09	1	1
PGAM1	-6.47558	-2.47567	1.91271e-08	3.68751e-07	1	1
TRMT61A	-6.46658	-2.46658	1.66066e-13	5.16834e-12	1	1
MCM3AP	-6.46643	-2.46644	2.30684e-09	4.86839e-08	1	1
MRPL16	-6.44453	-2.45485	2.40459e-06	3.60345e-05	1	1
SRSF6	-6.43899	-2.43899	3.7482e-11	9.37472e-10	1	1
RBM8A	-6.43196	-2.43225	6.5708e-08	1.20553e-06	1	1
PSMD1	-6.42675	-2.47774	1.24583e-05	0.000168821	1	1
SUDS3	-6.42358	-2.45911	8.5234e-06	0.000118841	1	1
PSMD8	-6.41756	-2.42051	6.81604e-07	1.10702e-05	1	1
PPIL4	-6.41726	-2.42768	2.42845e-06	3.63377e-05	1	1
COPB2	-6.41157	-2.41162	1.04169e-08	2.06405e-07	1	1
FDXR	-6.4082	-2.41294	1.09938e-06	1.74424e-05	1	1
POP4	-6.40219	-2.40219	4.52463e-10	1.02266e-08	1	1
RPRD2	-6.40199	-2.41144	2.19929e-06	3.32654e-05	1	1
CDK1	-6.40142	-2.42153	4.73832e-06	6.83645e-05	1	1
WEE1	-6.38962	-2.41898	6.99321e-06	9.8741e-05	1	1
PSMD3	-6.38792	-2.40579	4.20051e-06	6.10495e-05	1	1
MRPS17	-6.38594	-2.38603	2.2494e-08	4.30403e-07	1	1
RPAP1	-6.38369	-2.48138	2.52256e-05	0.000329559	1	1
IDH3A	-6.382	-2.40996	6.65028e-06	9.42722e-05	1	1
YEATS4	-6.38142	-2.38143	2.18031e-09	4.61228e-08	0.7017	1
TTI1	-6.37996	-2.37996	2.35124e-12	6.52095e-11	1	1
TBCE	-6.37932	-2.38367	1.0066e-06	1.60417e-05	0.820863	1
DHX38	-6.37904	-2.37904	9.97879e-13	2.84723e-11	1	1
TFB2M	-6.3732	-2.3732	1.33508e-10	3.18294e-09	1	1
RNH1	-6.37215	-2.37232	3.85497e-08	7.25166e-07	1	1
GLE1	-6.35918	-2.38543	6.23131e-06	8.86147e-05	1	1
RCL1	-6.35657	-2.46539	2.84749e-05	0.000366637	1	1
DNTTIP2	-6.35416	-2.44025	2.19245e-05	0.000289614	1	1
MRPL17	-6.35344	-2.35851	1.17329e-06	1.84875e-05	1	1
GAPDH	-6.35161	-2.35377	4.98645e-07	8.25657e-06	0.675465	1
SEPHS2	-6.34622	-2.34622	3.9502e-12	1.07712e-10	1	1
TRIT1	-6.34071	-2.34074	7.10762e-09	1.44198e-07	1	1
RPL8	-6.34031	-2.34736	1.63682e-06	2.5338e-05	0.54029	1
SUPT16H	-6.33533	-2.33539	1.47345e-08	2.878e-07	1	1
THOC7	-6.33524	-2.33545	4.89637e-08	9.105e-07	0.472949	1
PRKAR1A	-6.33496	-2.33496	4.46558e-11	1.10912e-09	1	1
MRPL41	-6.33248	-2.33249	1.90132e-10	4.44381e-09	1	1
TAF4	-6.33127	-2.33128	2.09699e-09	4.44129e-08	1	1
WDR55	-6.33096	-2.33096	1.65058e-10	3.89349e-09	1	1
PGGT1B	-6.32994	-2.33016	4.97709e-08	9.23585e-07	1	1
NAA20	-6.32923	-2.32929	1.42284e-08	2.78219e-07	1	1
QRSL1	-6.32755	-2.33035	6.4822e-07	1.05568e-05	1	1
PSMB4	-6.3259	-2.3259	1.00014e-09	2.18572e-08	1	1
RPL30	-6.32475	-2.44202	3.10015e-05	0.000396593	1	1
HNRNPH1	-6.32453	-2.32453	2.89586e-12	7.96942e-11	1	1
CARS2	-6.32086	-2.32115	6.70916e-08	1.22586e-06	1	1
CWF19L2	-6.32033	-2.34409	5.6219e-06	8.02685e-05	1	1
MBTPS2	-6.32029	-2.46513	3.9587e-05	0.000498908	1	1
GABPA	-6.32028	-2.32582	1.28344e-06	2.00944e-05	1	1
URB2	-6.31672	-2.31672	2.6852e-11	6.76344e-10	1	1
TUFM	-6.31314	-2.31341	6.07526e-08	1.12102e-06	1	1
TCEB1	-6.31255	-2.32152	2.08653e-06	3.16943e-05	1	1
COPS3	-6.30457	-2.33032	6.10931e-06	8.70187e-05	1	1
CSTF1	-6.29187	-2.29187	1.78308e-10	4.17293e-09	1	1
CDC45	-6.28729	-2.28729	4.19338e-10	9.52619e-09	1	1
MIIP	-6.28092	-2.37291	2.35934e-05	0.000310281	1	1
GTF3C6	-6.27901	-2.29308	3.2937e-06	4.84625e-05	0.179821	1
DPH2	-6.27759	-2.29793	4.79522e-06	6.90179e-05	1	1
ARFRP1	-6.27533	-2.3226	1.14995e-05	0.000157263	1	1
NSMCE4A	-6.27377	-2.32403	1.2268e-05	0.000166622	1	1
PSMD7	-6.27103	-2.27105	3.82073e-09	7.94116e-08	1	1
DDX39B	-6.2616	-2.30735	1.11088e-05	0.00015227	1	1
LIN7C	-6.2616	-2.2616	6.47312e-10	1.43576e-08	1	1
NOL8	-6.25791	-2.25983	4.43658e-07	7.38036e-06	1	1
NUP160	-6.25678	-2.25761	1.91624e-07	3.33388e-06	1	1
RBM28	-6.25663	-2.29956	1.03902e-05	0.000143412	1	1
INTS7	-6.25611	-2.26833	2.85311e-06	4.22237e-05	1	1
CDKN2AIP	-6.2547	-2.2547	2.04712e-11	5.22263e-10	1	1
CPSF6	-6.25086	-2.2826	7.58146e-06	0.000106373	1	1
COX10	-6.249	-2.26834	4.55234e-06	6.58944e-05	1	1
EED	-6.24553	-2.24553	1.28261e-11	3.33424e-10	1	1
HNRNPA1	-6.23911	-2.26796	6.8687e-06	9.72139e-05	1	1
IBA57	-6.23901	-2.23903	5.14927e-09	1.06036e-07	1	1
MIS12	-6.23749	-2.26756	7.16951e-06	0.00010099	1	1
IMPDH2	-6.23609	-2.2361	3.1515e-09	6.60408e-08	1	1
CRLS1	-6.23513	-2.23514	1.29779e-09	2.80526e-08	1	1
C14orf166	-6.23184	-2.23186	4.20103e-09	8.70115e-08	1	1
CLP1	-6.22654	-2.22654	6.34812e-10	1.41331e-08	1	1
UTP14A	-6.22265	-2.22317	1.20532e-07	2.14301e-06	1	1
ZMYND8	-6.22163	-2.22163	5.66588e-13	1.66732e-11	1	1
PSMA2	-6.21998	-2.26369	1.05869e-05	0.000145902	1	1
FBXO5	-6.21964	-2.24945	7.10592e-06	0.000100174	1	1
DDX5	-6.21925	-2.21925	2.5335e-10	5.84475e-09	1	1
SCFD1	-6.21338	-2.31073	2.51255e-05	0.000328492	1	1
TPX2	-6.20348	-2.20359	2.44071e-08	4.66008e-07	1	1
AKIRIN2	-6.20131	-2.20131	1.13249e-10	2.71447e-09	1	1
UPF2	-6.20108	-2.22604	5.91412e-06	8.43057e-05	1	1
ATPAF2	-6.19855	-2.19859	9.08034e-09	1.81739e-07	1	1
UBA52	-6.18967	-2.20582	3.78924e-06	5.52975e-05	1	1
RRAGC	-6.18568	-2.19544	2.27259e-06	3.4316e-05	1	1
MRPL9	-6.18358	-2.18918	1.29697e-06	2.02885e-05	1	1
HCFC1	-6.17837	-2.17837	7.88396e-11	1.91285e-09	1	1
GMPPB	-6.17355	-2.17355	1.45645e-12	4.11613e-11	1	1
CKS1B	-6.16199	-2.20996	1.16795e-05	0.000159358	1	1
PDCL3	-6.16198	-2.16243	1.04315e-07	1.87147e-06	1	1
PPP2CA	-6.15698	-2.16052	8.18173e-07	1.31564e-05	1	1
VWA9	-6.14828	-2.16357	3.58289e-06	5.24578e-05	1	1
DCTN1	-6.14696	-2.28067	3.60522e-05	0.000458246	1	1
RECQL4	-6.14391	-2.14393	4.96806e-09	1.02422e-07	1	1
TAF6	-6.13817	-2.14306	1.13278e-06	1.7936e-05	1	1
TAF10	-6.13752	-2.13834	1.89245e-07	3.30216e-06	1	1
SRPRB	-6.12691	-2.22968	2.66987e-05	0.00034652	1	1
HNRNPK	-6.12647	-2.18887	1.54507e-05	0.000207792	1	1
DCAF13	-6.11336	-2.11451	2.65493e-07	4.55682e-06	1	1
FAM58A	-6.11267	-2.11299	7.26635e-08	1.3236e-06	1	1
DNAAF5	-6.11219	-2.11219	9.46077e-10	2.07011e-08	1	1
MRPS14	-6.10703	-2.17306	1.64199e-05	0.00022066	1	1
GRB2	-6.09855	-2.10211	8.24756e-07	1.32384e-05	1	1
TMEM258	-6.09465	-2.10855	3.25336e-06	4.79085e-05	1	1
BRD8	-6.09348	-2.1027	2.14416e-06	3.25143e-05	1	1
TIMM44	-6.08669	-2.08669	2.18855e-10	5.09509e-09	1	1
JUNB	-6.08273	-2.08277	8.72171e-09	1.74954e-07	1	1
COA7	-6.07985	-2.08532	1.26778e-06	1.98843e-05	1	1
SMARCA5	-6.07335	-2.10312	7.09655e-06	0.000100121	1	1
KAT5	-6.06922	-2.09847	6.96774e-06	9.84593e-05	1	1
AP2S1	-6.0647	-2.16641	2.63884e-05	0.000343493	1	1
TANGO6	-6.06433	-2.15517	2.3264e-05	0.000306242	1	1
TADA3	-6.06344	-2.07479	2.64772e-06	3.93802e-05	1	1
RARS	-6.06314	-2.06314	6.29144e-11	1.54539e-09	1	1
TSFM	-6.0611	-2.19505	3.61289e-05	0.000458567	1	1
MED19	-6.06052	-2.10496	1.07758e-05	0.000148275	1	1
PTDSS1	-6.05832	-2.05837	1.19061e-08	2.35129e-07	1	1
TAF5	-6.05688	-2.05688	5.08802e-10	1.13988e-08	1	1
PTP4A1	-6.04974	-2.04974	1.09053e-10	2.62448e-09	1	1
UBR5	-6.04878	-2.05399	1.20777e-06	1.89596e-05	1	1
RBM48	-6.048	-2.07714	6.93873e-06	9.81271e-05	1	1
SPC24	-6.04589	-2.06674	4.91694e-06	7.06558e-05	1	1
POLR2D	-6.04342	-2.08886	1.10275e-05	0.000151388	1	1
RPL35	-6.04281	-2.15347	2.90215e-05	0.000372868	1	1
DRAP1	-6.03226	-2.03581	8.20458e-07	1.31813e-05	1	1
ZC3H4	-6.03029	-2.03634	1.40245e-06	2.18427e-05	1	1
POLR1E	-6.02953	-2.09027	1.50117e-05	0.000202193	1	1
UBE2C	-6.02867	-2.02867	8.78856e-12	2.30819e-10	1	1
PSMA5	-6.02508	-2.02832	7.49813e-07	1.21008e-05	1	1
VARS	-6.02476	-2.02478	5.72279e-09	1.17035e-07	1	1
SMARCE1	-6.02358	-2.03084	1.68509e-06	2.60175e-05	1	1
EIF3H	-6.02211	-2.02211	1.17921e-09	2.55826e-08	1	1
FTSJ3	-6.01933	-2.02029	2.21778e-07	3.83978e-06	1	1
C11orf57	-6.01846	-2.01846	5.70156e-11	1.40436e-09	1	1
LSM11	-6.01778	-2.01782	1.03477e-08	2.05261e-07	1	1
POLR3B	-6.01772	-2.10121	2.11961e-05	0.000280824	1	1
DUT	-6.0161	-2.03423	4.26268e-06	6.19026e-05	0.601426	1
GTF2E2	-6.01512	-2.01755	5.61741e-07	9.22424e-06	1	1
XRN2	-6.00796	-2.00808	2.89012e-08	5.48877e-07	1	1
VCL	-6.0072	-2.0072	1.45277e-10	3.4451e-09	1	1
NFYB	-6.00613	-2.01457	1.96341e-06	2.99005e-05	1	1
NOL7	-5.99899	-2.00013	2.618e-07	4.50211e-06	0.109032	0.966167
KCMF1	-5.99831	-1.99832	2.34181e-09	4.93635e-08	1	1
COPS4	-5.99201	-2.06542	1.84152e-05	0.000246175	1	1
VPS35	-5.99006	-1.99006	1.96826e-13	6.10433e-12	1	1
SRRT	-5.9885	-1.98851	2.03993e-09	4.34106e-08	1	1
NARFL	-5.9838	-2.01996	8.68267e-06	0.000120873	1	1
ATXN10	-5.9817	-1.9817	4.91886e-11	1.22e-09	1	1
CDC5L	-5.97899	-2.00378	5.87457e-06	8.3809e-05	1	1
GSPT1	-5.97616	-1.9784	5.18217e-07	8.56475e-06	1	1
MED17	-5.9753	-1.98877	3.15052e-06	4.64707e-05	1	1
SRP19	-5.97447	-1.97451	9.70735e-09	1.93204e-07	1	1
SOD1	-5.97342	-1.9735	1.72283e-08	3.34676e-07	1	1
MRPS34	-5.96647	-1.98342	3.98005e-06	5.79871e-05	1	1
CLASP1	-5.96577	-2.06757	2.64145e-05	0.000343581	1	1
CCT2	-5.96205	-1.96435	5.30213e-07	8.73871e-06	1	1
COX5A	-5.95964	-1.96004	9.33659e-08	1.68864e-06	1	1
HIRA	-5.95911	-1.95929	4.27325e-08	7.98793e-07	1	1
HAUS6	-5.95676	-1.95684	1.85625e-08	3.5864e-07	1	1
SPOP	-5.95366	-1.95369	5.6394e-09	1.1568e-07	1	1
POP5	-5.95355	-2.02152	1.69412e-05	0.000226981	1	1
GTPBP4	-5.95328	-1.95329	5.31347e-10	1.18741e-08	1	1
PCBP1	-5.94862	-2.01573	1.67109e-05	0.000224064	1	1
CRKL	-5.94857	-1.94857	1.07906e-09	2.34669e-08	1	1
VDAC2	-5.94329	-1.94565	5.44963e-07	8.95698e-06	1	1
CMTR1	-5.94246	-1.94247	1.71401e-09	3.67379e-08	1	1
MRPL51	-5.9395	-1.9395	7.04422e-10	1.55278e-08	1	1
AHCYL1	-5.93897	-1.93898	4.9724e-10	1.11538e-08	1	1
CCNB1	-5.93636	-1.9378	3.31411e-07	5.62327e-06	0.441842	1
ASNS	-5.93141	-1.93142	3.86233e-10	8.81906e-09	1	1
U2AF2	-5.92662	-2.01147	2.15782e-05	0.000285251	1	1
POLR1B	-5.92472	-1.92488	3.78305e-08	7.12388e-07	1	1
DIS3	-5.92445	-1.92448	5.99657e-09	1.22494e-07	1	1
EP400	-5.92381	-1.92399	4.30049e-08	8.03043e-07	1	1
TUBB4B	-5.92284	-1.92284	1.07558e-11	2.80833e-10	1	1
LARS	-5.9205	-1.92051	2.05698e-09	4.36691e-08	1	1
SF3A3	-5.91608	-1.91656	1.10742e-07	1.98279e-06	1	1
NDUFB9	-5.91258	-1.91258	7.8495e-11	1.90709e-09	1	1
C15orf39	-5.90905	-1.90906	3.25198e-09	6.7907e-08	1	1
SMC3	-5.9087	-1.99218	2.11917e-05	0.000280824	0.356992	1
KANSL3	-5.90641	-1.95599	1.20935e-05	0.000164378	1	1
INO80B	-5.90307	-1.95599	1.29594e-05	0.000175478	1	1
HNRNPA2B1	-5.90182	-1.91254	2.49955e-06	3.73634e-05	1	1
TPRKB	-5.90031	-1.90932	2.09611e-06	3.18126e-05	0.97003	1
PSMB2	-5.90025	-1.91009	2.29164e-06	3.45451e-05	0.732497	1
ATP5A1	-5.89911	-1.89984	1.68376e-07	2.95246e-06	1	1
RANBP2	-5.89605	-1.89628	5.24261e-08	9.71845e-07	1	1
PDRG1	-5.89507	-1.90719	2.82827e-06	4.18908e-05	1	1
MRPL13	-5.88548	-1.8865	2.35548e-07	4.07028e-06	1	1
ELOF1	-5.88407	-1.98712	2.67817e-05	0.000347344	1	1
PPP1R7	-5.88154	-1.88182	6.51815e-08	1.1971e-06	1	1
H2AFX	-5.88011	-1.88012	2.06285e-09	4.37418e-08	1	1
CABIN1	-5.87518	-1.89233	4.0294e-06	5.86582e-05	1	1
EMC1	-5.87459	-1.88682	2.85762e-06	4.22554e-05	1	1
PTPN23	-5.87449	-1.8764	4.41457e-07	7.35061e-06	1	1
KARS	-5.87297	-1.93298	1.48165e-05	0.000199715	1	1
CDK13	-5.87116	-1.87116	8.55922e-11	2.07105e-09	1	1
GOLT1B	-5.8705	-1.91637	1.11404e-05	0.000152469	1	1
RPS16	-5.86356	-1.86625	6.22691e-07	1.01876e-05	1	1
ATP5J2	-5.86091	-1.90833	1.15379e-05	0.000157546	1	1
C19orf52	-5.85449	-1.8545	2.28329e-09	4.82439e-08	0.343743	1
AMD1	-5.84554	-1.84572	4.20118e-08	7.86145e-07	1	1
FBL	-5.84075	-1.84375	6.94346e-07	1.12566e-05	1	1
IPO9	-5.83578	-1.84559	2.28444e-06	3.44656e-05	1	1
SART1	-5.83531	-1.83575	1.00666e-07	1.81514e-06	1	1
COG3	-5.83389	-2.11384	9.05253e-05	0.00109819	1	1
DDX41	-5.82631	-1.82824	4.45492e-07	7.40397e-06	1	1
RPL36A	-5.82131	-1.90565	2.14347e-05	0.000283565	1	1
TTF1	-5.81725	-1.93955	3.25254e-05	0.000415194	1	1
PSMC3	-5.81631	-1.81642	2.53111e-08	4.82752e-07	1	1
CDK2	-5.815	-1.81504	7.8925e-09	1.58857e-07	1	1
NGLY1	-5.8143	-1.8145	4.67584e-08	8.71309e-07	1	1
MSL1	-5.80927	-1.81328	9.2805e-07	1.48493e-05	1	1
DDX27	-5.80608	-1.90959	2.69139e-05	0.000348805	1	1
MCRS1	-5.80605	-1.8094	7.74958e-07	1.2484e-05	1	1
CHMP3	-5.80466	-1.83687	7.70057e-06	0.000107875	1	1
DDB1	-5.7962	-1.80248	1.45465e-06	2.25965e-05	1	1
MFAP1	-5.79539	-1.79641	2.36022e-07	4.07096e-06	1	1
NAA15	-5.79236	-1.79237	1.68545e-09	3.61692e-08	0.543503	1
PPIH	-5.78879	-1.80481	3.75849e-06	5.48937e-05	1	1
RAD50	-5.78709	-1.78868	3.65747e-07	6.17063e-06	1	1
ERCC3	-5.78045	-1.78149	2.40498e-07	4.14376e-06	1	1
TOP3A	-5.77953	-1.77953	4.30981e-11	1.07192e-09	1	1
CHMP7	-5.77929	-1.90793	3.44745e-05	0.000439445	1	1
STX18	-5.77819	-1.77842	5.25886e-08	9.73846e-07	1	1
EIF1AD	-5.77624	-1.77624	2.27853e-10	5.27702e-09	1	1
RPS15	-5.77442	-1.77442	2.26877e-10	5.26125e-09	1	1
TIMMDC1	-5.77051	-1.80181	7.47508e-06	0.000105046	1	1
DENR	-5.76878	-1.76929	1.15942e-07	2.06553e-06	1	1
NUP35	-5.76874	-1.7808	2.81722e-06	4.17966e-05	1	1
THG1L	-5.76658	-1.76658	6.44659e-10	1.43166e-08	1	1
LTV1	-5.7658	-1.87719	2.92391e-05	0.000375123	1	1
RHNO1	-5.75946	-1.75954	1.81979e-08	3.52359e-07	1	1
HSPA5	-5.75899	-1.79783	9.35632e-06	0.000129946	1	1
CPSF1	-5.75343	-1.75347	1.0336e-08	2.05258e-07	1	1
ATAD3A	-5.75324	-1.75324	7.06534e-10	1.55551e-08	1	1
CSNK2B	-5.75111	-1.79933	1.17428e-05	0.000160099	1	1
DNAJC11	-5.74814	-1.74999	4.2636e-07	7.11252e-06	1	1
MED24	-5.74609	-1.76564	4.60427e-06	6.64841e-05	1	1
DOHH	-5.74494	-1.7458	1.97145e-07	3.42659e-06	1	1
NFYC	-5.74376	-1.80569	1.53257e-05	0.000206267	1	1
MCPH1	-5.74101	-1.74164	1.44917e-07	2.56158e-06	1	1
GEMIN4	-5.74076	-1.83355	2.38192e-05	0.00031302	1	1
USO1	-5.73926	-1.73943	3.94422e-08	7.41172e-07	1	1
RBM39	-5.73844	-1.73852	1.81082e-08	3.51004e-07	1	1
PWP1	-5.73691	-1.74661	2.25771e-06	3.41201e-05	1	1
EIF3A	-5.73688	-1.73834	3.36672e-07	5.70711e-06	1	1
SENP6	-5.73667	-1.73786	2.73846e-07	4.68665e-06	1	1
CNOT10	-5.73412	-1.79288	1.44897e-05	0.000195606	1	1
CAND1	-5.73338	-1.73339	1.78041e-09	3.81154e-08	1	1
PCF11	-5.7327	-1.73747	1.10473e-06	1.75116e-05	1	1
CLASRP	-5.72914	-2.00833	9.01925e-05	0.0010949	1	1
PSME3	-5.72712	-1.77242	1.09924e-05	0.000151023	1	1
PRRC2A	-5.726	-1.72755	3.57747e-07	6.05285e-06	1	1
ANKRD17	-5.72429	-1.72429	1.60016e-12	4.51514e-11	1	1
SCO2	-5.71654	-1.71704	1.14622e-07	2.04406e-06	1	1
HSPD1	-5.71491	-1.71494	7.22369e-09	1.4622e-07	1	1
MRPL20	-5.7132	-1.72054	1.70477e-06	2.62986e-05	1	1
NFIB	-5.7124	-1.71283	1.0006e-07	1.80604e-06	1	1
SYVN1	-5.71087	-1.71103	3.7435e-08	7.05685e-07	1	1
AURKC	-5.70889	-1.71291	9.28448e-07	1.48493e-05	1	1
DDX20	-5.70873	-1.78988	2.05467e-05	0.000272828	1	1
PTPMT1	-5.70705	-1.72786	4.90772e-06	7.05802e-05	1	1
PGP	-5.70308	-1.71894	3.71952e-06	5.43691e-05	1	1
C10orf2	-5.70204	-1.85152	4.10855e-05	0.000515607	1	1
ATAD5	-5.69926	-1.85686	4.37466e-05	0.000547462	1	1
FANCF	-5.69478	-1.6948	3.98636e-09	8.27575e-08	1	1
NSF	-5.69416	-1.70239	1.91276e-06	2.91541e-05	1	1
GTF3A	-5.68956	-1.70824	4.39476e-06	6.37169e-05	1	1
MUS81	-5.6884	-1.6884	1.57427e-09	3.39058e-08	1	1
MPHOSPH10	-5.68775	-1.78486	2.5058e-05	0.000328091	1	1
NDUFB2	-5.68628	-1.68638	2.259e-08	4.31776e-07	1	1
FANCG	-5.67858	-1.68008	3.44811e-07	5.83952e-06	1	1
MRPL42	-5.6761	-1.73384	1.42193e-05	0.0001921	1	1
PRC1	-5.67206	-1.67209	6.87925e-09	1.39883e-07	1	1
ATP6V1G1	-5.67044	-1.78545	3.03185e-05	0.000388691	1	1
SYMPK	-5.66822	-1.67275	1.05049e-06	1.67114e-05	1	1
NDUFV2	-5.66614	-1.66784	3.91762e-07	6.58022e-06	1	1
CEBPZ	-5.66597	-1.66615	4.12594e-08	7.72878e-07	1	1
CENPN	-5.66538	-1.66834	6.84589e-07	1.11085e-05	1	1
NDUFAF3	-5.66173	-1.66173	9.49968e-11	2.29239e-09	1	1
THOC1	-5.66172	-1.73463	1.82806e-05	0.000244559	1	1
DDX6	-5.65869	-1.70205	1.0498e-05	0.000144788	1	1
UBE3A	-5.65861	-1.66671	1.88311e-06	2.87513e-05	1	1
PPIL2	-5.65779	-1.76413	2.77427e-05	0.000357726	1	1
COPS8	-5.65745	-1.66955	2.82561e-06	4.18862e-05	1	1
UBIAD1	-5.65268	-1.66195	2.15779e-06	3.26932e-05	1	1
EXOC4	-5.64416	-1.88368	7.35889e-05	0.000901931	1	1
HDAC3	-5.64062	-1.6449	9.91682e-07	1.58323e-05	1	1
CHORDC1	-5.64045	-1.64752	1.64133e-06	2.53858e-05	1	1
TRUB2	-5.63716	-1.6372	9.43167e-09	1.88138e-07	1	1
CBX8	-5.63585	-1.63588	7.19951e-09	1.45897e-07	1	1
NELFA	-5.6308	-2.09421	0.000190677	0.0022312	1	1
PRPF6	-5.628	-1.72701	2.56075e-05	0.000333815	1	1
HAUS8	-5.62671	-1.70767	2.04931e-05	0.000272321	1	1
TAF1	-5.62467	-1.79413	4.77264e-05	0.000595179	1	1
BRAF	-5.61956	-1.62057	2.33052e-07	4.03105e-06	1	1
FLCN	-5.61736	-1.62248	1.18655e-06	1.86594e-05	1	1
ZFX	-5.61639	-1.75324	3.70414e-05	0.00046815	1	1
DNAJA3	-5.616	-1.68232	1.65008e-05	0.00022158	1	1
TLK2	-5.61396	-1.61398	2.97629e-09	6.24425e-08	1	1
TFB1M	-5.60949	-1.71423	2.72736e-05	0.000352698	1	1
RRP7A	-5.60719	-1.61832	2.59626e-06	3.86469e-05	1	1
ZNF598	-5.60175	-1.60359	4.25025e-07	7.09689e-06	1	1
COX6B1	-5.59943	-1.60161	5.01564e-07	8.2972e-06	1	1
NDUFS1	-5.59594	-1.5962	6.12151e-08	1.12774e-06	1	1
TRIM37	-5.59231	-1.60126	2.08267e-06	3.16626e-05	1	1
MEAF6	-5.58882	-1.59309	9.86496e-07	1.57636e-05	1	1
URB1	-5.5857	-1.72944	3.92298e-05	0.000495106	1	1
NOP9	-5.58148	-1.58148	1.03962e-09	2.26645e-08	1	1
SETDB1	-5.58012	-1.58279	6.1844e-07	1.01273e-05	1	1
DSCC1	-5.57974	-1.57974	1.07646e-10	2.59412e-09	1	1
ANAPC1	-5.57739	-1.84147	8.36865e-05	0.001018	1	1
KRR1	-5.57288	-1.70596	3.5857e-05	0.00045609	1	1
ANAPC10	-5.57147	-1.66871	2.50952e-05	0.000328337	1	1
TRMT6	-5.5632	-1.59102	6.61693e-06	9.38741e-05	1	1
WBP11	-5.56286	-1.65197	2.27774e-05	0.000300214	1	1
ALG8	-5.56114	-1.56588	1.09551e-06	1.73964e-05	1	1
ADRM1	-5.56042	-1.56043	1.49909e-09	3.23256e-08	1	1
ELP3	-5.55915	-1.69461	3.66022e-05	0.000463584	1	1
ATP5H	-5.55849	-1.70454	3.99758e-05	0.000503096	1	1
EIF6	-5.55516	-1.56702	2.76825e-06	4.11042e-05	1	1
SKA1	-5.55069	-1.65575	2.73701e-05	0.000353689	1	1
TSEN2	-5.55036	-1.60933	1.45447e-05	0.000196199	1	1
PSMA6	-5.54951	-2.01391	0.000191335	0.00223743	1	1
MRPL2	-5.54801	-1.78437	7.23298e-05	0.000887109	1	1
NOL6	-5.54584	-1.62275	1.93745e-05	0.000258418	1	1
MTOR	-5.54425	-1.54444	4.5823e-08	8.54771e-07	1	1
XRCC1	-5.54078	-1.54081	6.95304e-09	1.41223e-07	1	1
MNAT1	-5.53652	-1.84959	0.000105621	0.0012718	1	1
RAC1	-5.53478	-1.57056	8.58672e-06	0.00011963	1	1
IRF2BP1	-5.53433	-1.63586	2.63363e-05	0.000343065	1	1
NDUFS8	-5.53347	-1.53376	6.64184e-08	1.21606e-06	1	1
CPSF3	-5.52786	-1.53125	7.82333e-07	1.25915e-05	1	1
EXOC2	-5.52574	-1.661	3.654e-05	0.000463455	1	1
WDR33	-5.51136	-1.7364	6.78984e-05	0.000835239	1	1
ZW10	-5.50521	-1.50715	4.47673e-07	7.43329e-06	1	1
SRRM2	-5.50112	-1.8248	0.00011071	0.00133038	1	1
GTF2E1	-5.49401	-1.49918	1.19692e-06	1.88059e-05	1	1
CXXC1	-5.48909	-2.2061	0.000421201	0.00472408	1	1
UBE2M	-5.48854	-1.63691	4.07253e-05	0.00051163	1	1
ALKBH8	-5.48155	-1.48271	2.69624e-07	4.62327e-06	1	1
AURKB	-5.47975	-1.56834	2.26285e-05	0.000298472	1	1
EIF5	-5.47959	-1.54664	1.66939e-05	0.000224005	1	1
PRMT1	-5.47874	-1.6146	3.67298e-05	0.000464759	0.401263	1
MRPL28	-5.47442	-1.63525	4.48198e-05	0.000560106	1	1
SSB	-5.46952	-1.56661	2.50513e-05	0.000328091	1	1
SETD1A	-5.46804	-1.47889	2.52922e-06	3.77437e-05	1	1
NDUFB10	-5.46298	-1.46304	1.21621e-08	2.39666e-07	1	1
GMNN	-5.45692	-1.4678	2.53788e-06	3.78411e-05	1	1
EIF4ENIF1	-5.4485	-1.44897	1.07245e-07	1.92212e-06	1	1
C20orf24	-5.44849	-1.45615	1.77877e-06	2.72749e-05	1	1
MEN1	-5.448	-1.44845	1.03456e-07	1.85793e-06	1	1
ACTR5	-5.44755	-1.49493	1.1526e-05	0.000157505	1	1
API5	-5.44714	-1.45431	1.66355e-06	2.57072e-05	1	1
NDUFV1	-5.44601	-1.44674	1.68592e-07	2.95334e-06	1	1
MCM10	-5.44162	-1.80089	0.0001287	0.00153519	1	1
CIR1	-5.43575	-1.48145	1.10968e-05	0.000152223	1	1
CASC3	-5.4327	-1.43348	1.79561e-07	3.13933e-06	1	1
VPS45	-5.43051	-1.43153	2.36044e-07	4.07096e-06	1	1
DDX28	-5.4294	-1.43338	9.20619e-07	1.47506e-05	1	1
CD3EAP	-5.42129	-1.52732	2.7651e-05	0.000356802	1	1
FANCI	-5.42006	-1.49648	1.92372e-05	0.000256779	1	1
COG7	-5.41964	-1.42082	2.7262e-07	4.67015e-06	1	1
CARNMT1	-5.41915	-1.42907	2.31054e-06	3.47711e-05	1	1
ZNF131	-5.41788	-1.67158	7.9347e-05	0.000967187	1	1
PPIE	-5.41761	-1.52686	2.86002e-05	0.000367986	1	1
RIC1	-5.41255	-1.42612	3.17343e-06	4.67701e-05	1	1
NDUFB11	-5.4004	-1.40214	4.00865e-07	6.71864e-06	1	1
EPRS	-5.39999	-1.42663	6.32704e-06	8.98329e-05	1	1
TSEN34	-5.39953	-1.53488	3.65692e-05	0.000463496	1	1
BUD31	-5.39083	-1.4321	9.96914e-06	0.000137707	1	1
RPS17	-5.3896	-1.6511	8.25996e-05	0.00100546	1	1
ATP6V1C1	-5.38816	-1.53971	4.17607e-05	0.000523343	1	1
RPL13	-5.38738	-1.89486	0.000221716	0.00257079	1	1
DHODH	-5.38367	-1.46546	2.07244e-05	0.000274983	1	1
MCM4	-5.38366	-1.66428	9.08184e-05	0.001101	1	1
USP22	-5.38215	-1.88846	0.000220855	0.00256247	1	1
MIOS	-5.38104	-1.38143	9.01936e-08	1.63292e-06	1	1
NXT1	-5.37434	-1.48555	2.91847e-05	0.000374694	1	1
RAB3GAP2	-5.37262	-1.41848	1.11394e-05	0.000152469	1	1
MIS18A	-5.37099	-1.37099	1.28819e-10	3.07528e-09	1	1
PDAP1	-5.36941	-1.50532	3.67471e-05	0.000464759	0.617175	1
SLC25A28	-5.36716	-1.53276	4.64172e-05	0.000579257	1	1
LIPT2	-5.3637	-1.38243	4.40783e-06	6.38545e-05	1	1
FASN	-5.36256	-1.37115	1.99624e-06	3.03745e-05	1	1
JMJD6	-5.36128	-1.39519	8.12073e-06	0.000113493	1	1
OPA1	-5.35976	-1.36966	2.30622e-06	3.47354e-05	1	1
TAF1D	-5.35959	-1.45582	2.48026e-05	0.000325224	1	1
SRSF10	-5.35659	-1.93007	0.000274517	0.00313812	1	1
CCNL1	-5.34989	-1.37013	4.76985e-06	6.87275e-05	1	1
DGCR8	-5.3481	-1.50496	4.35041e-05	0.000544809	1	1
NDUFB6	-5.34806	-1.34986	4.15298e-07	6.95401e-06	1	1
WAC	-5.34714	-1.61904	8.70276e-05	0.0010572	1	1
EIF2AK4	-5.33885	-1.3872	1.17758e-05	0.000160426	1	1
EFTUD2	-5.3388	-1.35383	3.52257e-06	5.1617e-05	1	1
LEO1	-5.33578	-1.38932	1.31203e-05	0.000177522	1	1
GATB	-5.33548	-1.37632	9.86128e-06	0.000136323	1	1
WARS2	-5.3294	-1.64756	0.000108044	0.00129922	1	1
GRSF1	-5.32933	-1.40917	2.01818e-05	0.000268785	1	1
NBAS	-5.32431	-1.32468	8.49919e-08	1.54031e-06	1	1
ZNF622	-5.32158	-1.37016	1.18356e-05	0.000161117	1	1
PFDN2	-5.3098	-1.42528	3.0459e-05	0.000390212	1	1
SPRTN	-5.30962	-1.66488	0.000126601	0.00151218	1	1
ELP2	-5.30467	-1.38503	2.03265e-05	0.000270307	1	1
CENPJ	-5.30347	-1.43225	3.45202e-05	0.000439679	1	1
ATP6AP2	-5.30213	-1.76058	0.000187376	0.00219545	1	1
ATP5B	-5.29974	-1.39337	2.40584e-05	0.00031593	1	1
BAP1	-5.29439	-1.33508	9.82412e-06	0.000135914	1	1
CHCHD1	-5.28881	-1.41767	3.45422e-05	0.000439679	1	1
STT3A	-5.28345	-1.31789	8.25391e-06	0.000115264	1	1
RRM1	-5.28193	-1.2933	2.65215e-06	3.94132e-05	0.187842	1
FIP1L1	-5.2815	-1.5309	7.75823e-05	0.000946972	1	1
CCNE1	-5.27878	-1.28673	1.84901e-06	2.82549e-05	1	1
POLRMT	-5.26966	-1.71233	0.00017712	0.00207938	1	1
CRTC3	-5.26268	-1.2781	3.61567e-06	5.28944e-05	1	1
NUP37	-5.26138	-1.29215	7.34364e-06	0.000103362	1	1
ARL2	-5.25783	-1.47552	6.50805e-05	0.000803726	1	1
CDT1	-5.25592	-1.57047	0.000106328	0.00127945	1	1
NCAPD2	-5.25121	-1.50006	7.7356e-05	0.000945504	1	1
COPB1	-5.24672	-1.6362	0.000145177	0.00172251	1	1
MRTO4	-5.24501	-1.29581	1.24093e-05	0.000168285	1	1
RRAGA	-5.24491	-1.24862	8.56993e-07	1.37435e-05	1	1
THOC2	-5.24323	-1.47175	6.92477e-05	0.000851064	1	1
DPH1	-5.23952	-1.27286	7.9789e-06	0.000111598	1	1
CASC5	-5.23656	-1.45131	6.39645e-05	0.000791039	1	1
NUP85	-5.22895	-1.72334	0.000212176	0.00246497	1	1
ZC3H15	-5.22612	-1.23425	1.88851e-06	2.8809e-05	1	1
CTDP1	-5.22448	-1.90894	0.000383569	0.00433197	1	1
STOML2	-5.22441	-1.30812	2.12572e-05	0.000281425	1	1
ERCC1	-5.22009	-1.51349	9.65189e-05	0.00116772	1	1
GBF1	-5.21894	-1.46791	7.74094e-05	0.000945508	1	1
PIK3C3	-5.21346	-1.69013	0.000199687	0.00232899	1	1
CHTF18	-5.20402	-1.61055	0.00015499	0.00183284	1	1
TMEM147	-5.20301	-1.30742	2.71789e-05	0.000351728	1	1
GEMIN2	-5.20231	-1.39607	5.62281e-05	0.000696814	1	1
DAP3	-5.20172	-1.56067	0.000128536	0.00153425	1	1
E2F3	-5.20106	-1.24123	9.69194e-06	0.000134294	1	1
ARMC5	-5.20074	-1.50563	0.000101788	0.0012298	1	1
SLC20A1	-5.19603	-1.21241	3.84306e-06	5.6037e-05	1	1
MPP6	-5.19411	-1.72988	0.000243376	0.00280732	1	1
BCL2L1	-5.1874	-1.37189	5.29283e-05	0.000657749	1	1
UXT	-5.18376	-1.7434	0.000262774	0.00301548	1	1
RGP1	-5.18185	-1.18674	1.13399e-06	1.7936e-05	0.458428	1
NDUFB8	-5.17632	-1.19783	5.07793e-06	7.26763e-05	1	1
ZNHIT1	-5.17519	-1.61166	0.000173199	0.00203737	1	1
UBA3	-5.17204	-1.20893	8.86495e-06	0.000123218	1	1
WDR59	-5.16619	-1.1755	2.16713e-06	3.28068e-05	1	1
FAM50A	-5.1647	-1.27136	2.78362e-05	0.000358672	1	1
AKAP8L	-5.1499	-1.17097	4.96999e-06	7.13606e-05	1	1
PELP1	-5.14196	-1.32503	5.24287e-05	0.000651995	1	1
NRF1	-5.13892	-1.24489	2.76344e-05	0.000356802	1	1
KDM1A	-5.13249	-1.17161	9.42715e-06	0.000130828	1	1
MTX2	-5.13132	-1.3772	7.61468e-05	0.000932002	1	1
EEF1A2	-5.12915	-1.27434	3.96977e-05	0.00049995	1	1
MBD2	-5.12866	-1.23106	2.65882e-05	0.000345588	1	1
ATP5C1	-5.11958	-1.5403	0.000163468	0.00192926	1	1
KIF14	-5.11899	-1.12452	1.28148e-06	2.00814e-05	1	1
MIS18BP1	-5.11878	-1.38409	8.42054e-05	0.00102361	1	1
UFC1	-5.11773	-1.14941	7.56677e-06	0.000106251	1	1
MTMR6	-5.11099	-1.12595	3.50559e-06	5.14105e-05	1	1
C1orf109	-5.10167	-1.31713	6.42344e-05	0.000793826	1	1
MSL2	-5.10095	-1.11092	2.32229e-06	3.49186e-05	1	1
EMC2	-5.0995	-1.26026	4.47993e-05	0.000560106	1	1
EXOSC10	-5.0978	-1.215	3.09787e-05	0.000396586	1	1
TLN1	-5.09358	-1.23666	3.90182e-05	0.000492785	1	1
LARP7	-5.09242	-1.3108	6.53387e-05	0.000806356	1	1
EXOC1	-5.08935	-1.33002	7.40483e-05	0.00090694	0.836189	1
YLPM1	-5.08651	-1.10586	4.55775e-06	6.59192e-05	1	1
CEP55	-5.08627	-1.41796	0.00011463	0.00137471	1	1
COPZ1	-5.08433	-1.33899	7.97487e-05	0.000971419	1	1
GFM2	-5.08347	-1.08662	7.28598e-07	1.17798e-05	1	1
LAMTOR1	-5.08134	-1.69789	0.000313577	0.00357318	1	1
CSE1L	-5.07902	-1.65639	0.000277897	0.00317472	1	1
ARF1	-5.07893	-1.44329	0.000131395	0.00156316	1	1
ICMT	-5.07111	-1.17376	2.66632e-05	0.000346311	1	1
B3GNT2	-5.06463	-1.39221	0.000112607	0.00135227	1	1
YAP1	-5.06196	-1.15281	2.32691e-05	0.000306242	1	1
MAEA	-5.06082	-1.14038	2.01049e-05	0.000267961	1	1
TM2D2	-5.06061	-1.14795	2.22765e-05	0.000294046	0.815723	1
RACGAP1	-5.05399	-1.28475	7.01217e-05	0.00086062	1	1
ALYREF	-5.05257	-1.26388	6.26699e-05	0.000775567	1	1
PDSS2	-5.0508	-1.10148	1.23784e-05	0.000167993	1	1
ARPC2	-5.04826	-1.09704	1.1888e-05	0.000161707	1	1
SYNCRIP	-5.04449	-1.12481	2.03161e-05	0.000270307	1	1
C12orf45	-5.03106	-1.17868	4.04804e-05	0.000509088	1	1
STIL	-5.02904	-1.28147	7.8823e-05	0.000961458	1	1
AUP1	-5.02534	-1.04657	5.0101e-06	7.18787e-05	1	1
PPAT	-5.01441	-1.37814	0.000131065	0.00156131	1	1
TAF2	-5.00912	-1.406	0.000149388	0.00176895	1	1
ALG5	-5.00891	-1.15325	3.94246e-05	0.000497213	1	1
FAM120A	-5.00542	-1.17923	4.9215e-05	0.000613313	1	1
TUBGCP3	-5.00407	-1.11446	2.89409e-05	0.000372101	1	1
RTTN	-5.00215	-1.04617	1.06669e-05	0.000146891	1	1
ALDH18A1	-4.99823	-1.28691	9.43908e-05	0.00114275	1	1
PPM1D	-4.98455	-1.21505	7.00205e-05	0.00085997	1	1
NOL9	-4.98314	-1.20689	6.73954e-05	0.000830589	1	1
MALSU1	-4.97709	-1.16658	5.47011e-05	0.000678362	1	1
GNB2	-4.97694	-1.07503	2.53395e-05	0.000330651	1	1
EIF3M	-4.97584	-0.980904	1.17355e-06	1.84875e-05	1	1
ACLY	-4.97222	-1.31401	0.000119678	0.00143333	1	1
ITGB5	-4.97201	-1.0125	9.77072e-06	0.000135281	1	1
ITGAV	-4.95854	-1.09234	3.60835e-05	0.000458317	1	1
NPM1	-4.95724	-1.26796	0.000104515	0.00126019	1	1
PYGO2	-4.95212	-1.00668	1.33843e-05	0.000180957	1	1
GMEB2	-4.95035	-0.969006	4.38874e-06	6.36814e-05	1	1
FAF2	-4.94775	-1.36795	0.000163151	0.0019268	1	1
VPS18	-4.94537	-1.28665	0.000119419	0.00143118	1	1
ANKRD52	-4.9272	-0.999967	1.82403e-05	0.000244203	1	1
ACTR3	-4.92641	-1.07598	4.11149e-05	0.000515613	1	1
MRPS12	-4.92214	-1.4773	0.00025905	0.00298041	1	1
EIF3L	-4.91981	-1.14102	6.64218e-05	0.000819156	1	1
DHX36	-4.91889	-1.2219	0.000100912	0.00122004	1	1
EIF2B1	-4.91582	-1.06424	4.07399e-05	0.00051163	0.982219	1
UBQLN1	-4.91565	-0.950316	8.30892e-06	0.000115941	1	1
CHCHD4	-4.91332	-1.38427	0.000195768	0.00228477	1	1
ZC3H8	-4.9089	-1.11128	5.93614e-05	0.000735133	0.296929	1
DNLZ	-4.90583	-1.02623	3.1946e-05	0.000408382	1	1
TPR	-4.90229	-1.47503	0.000273893	0.00313299	1	1
RTF1	-4.89521	-1.33127	0.000172934	0.0020356	1	1
NFU1	-4.89387	-0.991979	2.53462e-05	0.000330651	1	1
FOXC1	-4.89333	-1.07817	5.30498e-05	0.0006588	1	1
COQ4	-4.89122	-1.1163	6.79132e-05	0.000835239	1	1
DCAF7	-4.88312	-1.07061	5.3988e-05	0.000669985	1	1
POLD2	-4.8819	-1.39478	0.000225747	0.00261242	1	1
ABHD11	-4.88144	-1.41852	0.000244416	0.0028175	1	1
ATP13A1	-4.87955	-0.975496	2.4722e-05	0.000324406	1	1
SFSWAP	-4.87869	-1.26456	0.000143146	0.00169955	1	1
UQCRC2	-4.87553	-1.09975	6.75774e-05	0.000832257	1	1
FBXL17	-4.87537	-0.949782	1.86898e-05	0.00024966	1	1
TSC22D2	-4.87441	-1.24716	0.000135915	0.00161477	1	1
UQCRFS1	-4.86754	-1.30428	0.000173361	0.00203793	1	1
CCP110	-4.85067	-1.03289	5.21305e-05	0.000648739	1	1
CDCA3	-4.84505	-1.21231	0.00013295	0.00158059	1	1
PSMF1	-4.83963	-0.851993	2.88811e-06	4.26709e-05	1	1
CDC37	-4.83674	-1.00157	4.61601e-05	0.000576451	1	1
RABGGTB	-4.83221	-0.9573	3.33814e-05	0.000425815	1	1
TTC7A	-4.82991	-1.14027	0.000104343	0.00125896	1	1
SLC35B2	-4.81487	-1.16526	0.000124075	0.001483	1	1
SLIRP	-4.80809	-0.985378	5.0414e-05	0.000627816	1	1
MRPS35	-4.80612	-1.47592	0.000367517	0.00415858	1	1
PTGES3	-4.8032	-1.44263	0.000335949	0.00382321	1	1
SLC25A1	-4.79781	-1.19724	0.000150857	0.00178516	1	1
PRMT7	-4.79732	-0.804684	1.7091e-06	2.63202e-05	1	1
MAU2	-4.78739	-1.35292	0.00026773	0.0030684	1	1
CEP85	-4.77057	-1.2409	0.000195342	0.00228129	1	1
PFDN4	-4.76508	-1.32906	0.000266425	0.0030554	1	1
PSMG1	-4.76437	-1.22335	0.000187722	0.00219806	1	1
FOXM1	-4.76232	-0.798828	8.76954e-06	0.000121987	1	1
PRPF4B	-4.74426	-1.52801	0.00050778	0.00564894	1	1
CALM2	-4.73749	-0.841307	2.70036e-05	0.000349713	1	1
TADA2B	-4.73174	-1.04376	0.000105129	0.00126673	1	1
NUP107	-4.72925	-1.11899	0.000145326	0.00172272	1	1
ATAD3C	-4.7282	-1.50339	0.000495922	0.00552736	1	1
DNAJC9	-4.7216	-1.16025	0.000174569	0.00205078	1	1
NELFCD	-4.71923	-0.966448	7.6694e-05	0.000938055	1	1
EEFSEC	-4.71681	-1.0233	0.00010253	0.00123793	1	1
METTL16	-4.71038	-1.29845	0.000287327	0.00327615	1	1
ZC3H7A	-4.7068	-0.828576	3.23662e-05	0.000413458	1	1
PGK1	-4.6969	-1.18282	0.000206144	0.00239958	1	1
NAMPT	-4.69266	-1.17897	0.00020642	0.00240123	1	1
AAGAB	-4.6919	-1.19379	0.000217609	0.00252644	1	1
VPS41	-4.68819	-1.57884	0.00067742	0.00746627	1	1
RNF8	-4.66976	-1.09684	0.000167353	0.00197382	1	1
PDSS1	-4.6568	-1.02112	0.000131377	0.00156316	1	1
RPS21	-4.64933	-1.45572	0.000540302	0.00599951	1	1
WRAP53	-4.6477	-1.52836	0.000659728	0.0072893	1	1
BECN1	-4.64045	-0.971849	0.000114488	0.00137393	0.538114	1
ICT1	-4.62693	-1.09232	0.000192002	0.00224375	0.757324	1
SSBP3	-4.62646	-1.08472	0.000187246	0.00219538	1	1
PCYT1A	-4.61346	-1.52592	0.000717449	0.0078734	1	1
C2orf49	-4.60971	-1.4996	0.000676052	0.0074558	1	1
FTO	-4.60807	-0.896693	9.4367e-05	0.00114275	1	1
SLX4	-4.6044	-0.967561	0.000130761	0.00155873	1	1
ATP6V1E1	-4.60353	-1.16194	0.000261745	0.00300754	1	1
ATP6AP1	-4.59792	-1.51148	0.000719529	0.00789136	1	1
SLC9A7	-4.59441	-1.16298	0.000270318	0.00309408	1	1
ILK	-4.59213	-1.02134	0.000168662	0.00198794	1	1
SOD2	-4.58848	-1.23521	0.000343333	0.00390227	1	1
PPP6C	-4.58634	-1.41213	0.000569553	0.00631645	1	1
DIMT1	-4.57071	-1.15077	0.000280242	0.00319742	1	1
PDCL	-4.56556	-0.955415	0.000145388	0.00172272	1	1
EXOSC8	-4.55898	-1.5717	0.000929729	0.0100667	1	1
SRRM1	-4.55858	-1.07466	0.000228158	0.0026369	1	1
NSFL1C	-4.54108	-1.25286	0.000414968	0.00465709	1	1
ETF1	-4.53836	-1.09706	0.00026199	0.00300842	1	1
SLC29A4	-4.53581	-1.54695	0.000925973	0.0100321	1	1
PYROXD1	-4.5306	-1.45139	0.000733289	0.00803733	1	1
ADAR	-4.52115	-1.07852	0.000260884	0.00299958	1	1
CELF1	-4.51603	-0.949255	0.000171161	0.00201607	1	1
SLC38A2	-4.51567	-0.863176	0.000122592	0.00146633	1	1
NDUFS5	-4.5127	-1.02463	0.00022503	0.00260582	1	1
CD320	-4.50275	-1.03408	0.000239891	0.00277071	1	1
HEATR1	-4.49834	-1.3935	0.000685531	0.00753704	1	1
VPS51	-4.4978	-0.84532	0.000122599	0.00146633	1	1
RBM5	-4.49754	-1.19756	0.000401218	0.00451984	1	1
ATP6V0E1	-4.49683	-1.20679	0.000412816	0.00463877	1	1
RPIA	-4.48438	-1.1315	0.000343734	0.00390434	1	1
TARS2	-4.48242	-1.52415	0.00100085	0.0107909	1	1
PINX1	-4.4735	-1.17322	0.000400861	0.00451868	1	1
PKN2	-4.4696	-1.12062	0.000347735	0.00394726	1	1
PRDM10	-4.46561	-1.37358	0.000709053	0.00778604	1	1
BRD4	-4.46092	-0.871822	0.000157577	0.0018622	1	1
TRAPPC12	-4.4602	-1.28798	0.000572634	0.00634666	1	1
AMDHD2	-4.45748	-0.990986	0.000241588	0.0027885	1	1
CRNKL1	-4.44706	-1.13633	0.00038896	0.00439008	1	1
KCNK5	-4.44573	-0.894591	0.0001811	0.00212471	1	1
CNPY2	-4.43611	-0.920609	0.000205139	0.00238945	1	1
EAF1	-4.41834	-1.12502	0.000408952	0.00460116	1	1
RAB6A	-4.4107	-1.22258	0.000548465	0.00608636	1	1
PRELID1	-4.40995	-1.04819	0.000334744	0.00381193	1	1
TRRAP	-4.40506	-1.16791	0.000479223	0.00535463	1	1
SKA2	-4.39811	-1.05535	0.000354199	0.00401553	1	1
DDRGK1	-4.39075	-1.0355	0.000341318	0.00388184	1	1
NDUFA11	-4.38722	-0.898828	0.000224792	0.00260475	1	1
GALE	-4.38695	-0.868161	0.000202839	0.0023642	1	1
GTPBP8	-4.36971	-0.917296	0.000252845	0.00291278	1	1
PRPF18	-4.36386	-1.13286	0.000487487	0.00543675	1	1
ATP5L2	-4.36131	-1.54539	0.00142784	0.0152016	1	1
GTF3C3	-4.35768	-0.923699	0.000268146	0.0030712	1	1
RNF41	-4.35394	-1.06318	0.00041197	0.0046322	1	1
GPAT4	-4.34943	-0.840336	0.000209673	0.00243748	1	1
COQ3	-4.33742	-0.989826	0.000349164	0.00396097	1	1
STAG1	-4.3335	-1.0323	0.000399803	0.00450961	1	1
NSMCE1	-4.31443	-1.25221	0.000766526	0.00838103	1	1
LSM2	-4.3045	-1.32871	0.000957332	0.010342	1	1
MRPL4	-4.30246	-1.27326	0.000834973	0.0090904	1	1
SNRPD3	-4.2934	-1.37607	0.00110968	0.0119211	1	1
UTP6	-4.28931	-0.837471	0.000253313	0.00291629	1	1
RAD23B	-4.2739	-1.03047	0.000470919	0.00526514	1	1
MYBL2	-4.26558	-1.02926	0.000480338	0.00536372	1	1
MAPK1	-4.25429	-1.04445	0.000516813	0.00574584	1	1
IER2	-4.24905	-0.910498	0.000358615	0.00406043	1	1
MRPL35	-4.23016	-1.19965	0.000832156	0.00906526	1	1
BARD1	-4.22438	-1.22314	0.000897138	0.00973154	1	1
TBP	-4.21708	-0.732761	0.000227853	0.00263508	1	1
REXO1	-4.21616	-1.2395	0.000955217	0.0103301	1	1
COPG1	-4.20793	-0.886341	0.000376886	0.00426189	1	1
NDUFC1	-4.20737	-1.19549	0.000873012	0.00947561	1	1
OLA1	-4.20611	-0.929109	0.000428448	0.00480233	1	1
DYNC1LI1	-4.20043	-1.10639	0.000705303	0.00774964	1	1
NVL	-4.19856	-1.44751	0.001674	0.017685	1	1
SURF4	-4.19491	-0.853422	0.000355521	0.00402795	1	1
UBE2Q1	-4.19202	-0.871516	0.000378075	0.00427263	0.769075	1
WDR62	-4.18992	-0.953955	0.000480818	0.00536572	1	1
SLC25A22	-4.1817	-1.06653	0.000667054	0.00736568	1	1
CLPB	-4.15955	-1.05074	0.00067838	0.00747038	1	1
DLD	-4.15873	-1.04623	0.000671793	0.00741342	1	1
MRPS28	-4.14858	-0.726592	0.000278455	0.00317906	1	1
SEL1L	-4.14653	-1.00389	0.000620044	0.00686359	1	1
VPS54	-4.13675	-1.23381	0.00115041	0.0123512	1	1
RNF40	-4.13104	-1.02237	0.00067863	0.00747038	1	1
MOCS3	-4.12621	-1.05466	0.000748111	0.00818973	1	1
BCCIP	-4.12532	-1.06731	0.000774966	0.00846812	1	1
TTF2	-4.11207	-0.989529	0.000654151	0.00723217	1	1
TMED2	-4.10094	-0.807331	0.000408619	0.00460032	1	1
RMND1	-4.10035	-0.823792	0.00042898	0.00480528	1	1
SAMD1	-4.0863	-0.83775	0.000464217	0.00519346	1	1
LEMD2	-4.07063	-0.869099	0.000528741	0.0058748	1	1
RFK	-4.05456	-1.06053	0.000913853	0.00990683	1	1
IWS1	-4.0538	-1.31734	0.00173461	0.0182929	1	1
CTPS1	-4.04864	-1.35017	0.00190233	0.0199907	1	1
TIMM10	-4.04011	-1.07654	0.000987508	0.0106599	1	1
GGNBP2	-4.03545	-0.779732	0.000454987	0.0050934	1	1
DAD1	-4.02356	-0.917951	0.000684136	0.00752634	1	1
FOXK1	-4.01939	-0.991434	0.000837656	0.00911404	1	1
YY1AP1	-4.01363	-1.37838	0.00221604	0.0230161	1	1
ZNF592	-4.01257	-1.0347	0.000952267	0.0103045	1	1
KDM2A	-4.0112	-0.793908	0.000506326	0.00563627	1	1
ZFP91	-4.00491	-1.02918	0.000957472	0.010342	1	1
KLF5	-3.99735	-1.07963	0.0011086	0.0119166	1	1
DDX42	-3.99322	-1.41084	0.00251588	0.0259639	1	1
MBD3	-3.97975	-0.930127	0.000792021	0.00864389	1	1
BIRC2	-3.97849	-1.04763	0.00107258	0.0115433	1	1
UFL1	-3.97483	-1.09417	0.00121626	0.0130425	1	1
MAGT1	-3.97212	-0.818188	0.000601558	0.00666309	1	1
KAT2A	-3.96981	-0.828211	0.000621776	0.00687849	1	1
TEX10	-3.96642	-0.889816	0.000738299	0.00808728	1	1
TAF6L	-3.96569	-1.33816	0.00225764	0.0234073	1	1
PHB	-3.96456	-0.67474	0.000413075	0.00463877	1	1
PRPF3	-3.95037	-1.21575	0.00174239	0.0183641	1	1
PGLS	-3.94426	-1.13064	0.00143595	0.0152788	1	1
NOP58	-3.92275	-1.36571	0.00267302	0.0274901	1	1
SLC31A1	-3.92121	-1.02961	0.0011835	0.0126988	1	1
LDB1	-3.91546	-0.871736	0.000804219	0.00876628	1	1
DPM2	-3.91447	-0.851099	0.00076423	0.00836105	1	1
PRIM1	-3.91381	-0.95388	0.000996651	0.0107521	1	1
G6PD	-3.91209	-0.693228	0.000504139	0.00561543	1	1
DCP1A	-3.90741	-1.1578	0.00167987	0.0177366	1	1
TXN2	-3.90519	-0.885775	0.000856279	0.009311	1	1
NGDN	-3.89858	-1.10076	0.00149289	0.0158563	1	1
POLA1	-3.88918	-1.10962	0.00156129	0.0165237	1	1
RBM17	-3.88495	-1.30452	0.00252764	0.0260702	1	1
ATF7IP	-3.88423	-1.15172	0.00175135	0.0184476	1	1
TFAP4	-3.86514	-1.0828	0.00155068	0.0164407	1	1
B3GALT6	-3.86263	-0.817696	0.000801713	0.00874431	1	1
NMT1	-3.85148	-1.36398	0.00315466	0.032276	1	1
SLC39A10	-3.84918	-1.2064	0.00217624	0.0226423	1	1
PMVK	-3.84816	-0.832698	0.000865027	0.00940038	1	1
PHF23	-3.84662	-1.28204	0.00262532	0.0270152	1	1
RTCB	-3.84243	-1.29658	0.00274543	0.0282024	1	1
FANCA	-3.83987	-1.01426	0.00139414	0.0148517	1	1
SHOC2	-3.83567	-0.969775	0.00126177	0.0134898	1	1
HNRNPM	-3.82431	-1.45988	0.00422079	0.0425973	1	1
SLF2	-3.82272	-0.944556	0.00122384	0.0131124	1	1
RBM33	-3.80238	-0.924355	0.00122425	0.0131124	1	1
FGFR1OP	-3.78269	-1.09274	0.001942	0.0203835	1	1
SIN3B	-3.77167	-0.936917	0.00136302	0.0145289	1	1
METAP1	-3.76324	-1.25445	0.00299893	0.0307179	1	1
PTBP1	-3.75479	-0.880129	0.00123458	0.013215	1	1
AXIN1	-3.74751	-0.697613	0.000791461	0.00864307	1	1
AP3D1	-3.74592	-0.933366	0.00143973	0.0153099	1	1
MRPL54	-3.73967	-0.725682	0.000868311	0.00943032	1	1
ZNF236	-3.73256	-0.883088	0.00131426	0.0140258	1	1
GATAD2B	-3.73227	-0.970946	0.00163252	0.0172571	1	1
TOX4	-3.7097	-0.856148	0.00130102	0.0138929	1	1
GPATCH1	-3.69248	-0.853917	0.00135024	0.0144012	1	1
FAM98B	-3.6792	-1.03217	0.0021541	0.0224381	1	1
NDST1	-3.67362	-0.724617	0.00102459	0.0110402	1	1
TAF3	-3.66833	-0.902642	0.0016152	0.0170841	1	1
DSN1	-3.65549	-0.707657	0.00102763	0.0110662	1	1
ILF3	-3.65268	-0.971202	0.00198218	0.0207565	1	1
PDCD5	-3.65245	-0.947894	0.00187446	0.019721	0.364987	1
GATAD1	-3.64979	-0.988698	0.00208228	0.0217535	1	1
ACTR2	-3.6461	-0.993013	0.00212288	0.0221517	1	1
ALG13	-3.63304	-1.00622	0.00226144	0.023433	0.587777	1
TAF1A	-3.63161	-0.838752	0.00151118	0.0160314	1	1
SPICE1	-3.62899	-1.18473	0.00349539	0.0356191	1	1
EIF2S1	-3.62171	-1.00491	0.0023166	0.023935	1	1
COQ5	-3.61825	-1.01085	0.00236943	0.0244668	1	1
ABCD4	-3.61707	-0.961047	0.00210786	0.0220079	1	1
NSMCE2	-3.61077	-0.992994	0.00231113	0.0238965	1	1
EML2	-3.60531	-0.675076	0.00107427	0.0115546	1	1
KLF9	-3.60116	-0.819753	0.00155423	0.0164686	1	1
RPA1	-3.59334	-0.907582	0.0019618	0.0205793	1	1
NUPL2	-3.58338	-0.91609	0.00205135	0.0214556	1	1
VPS29	-3.57703	-0.950628	0.00226372	0.023443	1	1
UBE2D3	-3.56606	-0.757797	0.00145501	0.0154632	1	1
GMPS	-3.56591	-0.931464	0.00222038	0.0230477	1	1
WDR24	-3.56279	-0.923326	0.00219371	0.0228108	1	1
GATA2	-3.56188	-0.835079	0.00177586	0.0186948	1	1
DICER1	-3.55557	-1.08195	0.00326029	0.0332994	1	1
GNL3	-3.55216	-1.23905	0.00476281	0.0476896	1	1
CCDC124	-3.54156	-0.856596	0.00196555	0.0206065	1	1
TUBGCP2	-3.53799	-0.958263	0.00253195	0.0260995	1	1
MLST8	-3.52728	-0.835913	0.00193533	0.0203255	1	1
SBNO1	-3.51918	-0.837394	0.0019807	0.0207531	1	1
NGRN	-3.51084	-1.18156	0.00458505	0.0459872	1	1
UBE2H	-3.49972	-0.875638	0.00227638	0.0235605	1	1
CUX1	-3.4984	-0.837072	0.00208106	0.0217535	1	1
INTS2	-3.49252	-0.864909	0.00225718	0.0234073	1	1
PAM16	-3.49159	-1.26131	0.00578462	0.0572141	1	1
RPN1	-3.48838	-0.923398	0.00262279	0.0270048	1	1
SPEN	-3.48198	-0.833765	0.00214795	0.0223871	1	1
ZNF148	-3.46795	-0.961654	0.00301678	0.030883	1	1
ADAT2	-3.46285	-0.589151	0.00123753	0.0132387	0.152634	1
DDA1	-3.46137	-0.713826	0.00168836	0.0178157	1	1
WDR48	-3.45453	-0.979485	0.00324927	0.0332059	1	1
RAD51B	-3.45237	-0.77932	0.00202301	0.0211716	1	1
RBSN	-3.44134	-1.13813	0.00487505	0.0487803	1	1
EPB41L2	-3.42611	-0.788238	0.00220211	0.0228847	1	1
NUMA1	-3.4233	-0.890543	0.00283254	0.0290804	1	1
E2F1	-3.41238	-0.89512	0.00293908	0.0301222	1	1
ZBTB21	-3.40844	-0.836949	0.00258228	0.026603	1	1
PAK1IP1	-3.39767	-1.05004	0.00439127	0.044118	1	1
IDH3B	-3.39718	-0.697581	0.0018971	0.0199475	1	1
HBS1L	-3.37348	-1.14804	0.0058506	0.0577386	1	1
BLM	-3.37083	-1.14184	0.00580221	0.0573564	1	1
IPO13	-3.36756	-0.921831	0.00348317	0.0355351	1	1
COG6	-3.35719	-0.561034	0.001499	0.0159117	1	1
RAPGEF1	-3.35546	-0.827848	0.0028675	0.0294055	1	1
FOXRED1	-3.34622	-0.697356	0.0021446	0.0223653	1	1
ZNHIT3	-3.323	-1.17503	0.0070126	0.0685612	1	1
FUBP1	-3.31292	-1.12391	0.00637132	0.0626694	1	1
ANKLE2	-3.3088	-1.15798	0.00696605	0.0681809	1	1
PPP2CB	-3.29998	-1.01749	0.00511797	0.0510452	1	1
CCSAP	-3.29567	-0.815443	0.00320957	0.032819	1	1
TUBA1C	-3.29273	-0.675022	0.00231153	0.0238965	1	1
HECTD1	-3.26838	-1.00828	0.00539415	0.0535005	0.392841	1
BRCA2	-3.26151	-0.968013	0.00498752	0.0497998	0.638183	1
CDC42BPB	-3.25812	-0.477343	0.00155662	0.0164841	1	1
NUP205	-3.25182	-0.815217	0.00355932	0.036229	1	1
DCP2	-3.25028	-0.827023	0.00367348	0.0372635	1	1
NDUFA2	-3.24152	-0.961628	0.0051494	0.0513299	1	1
ABCF2	-3.24076	-0.767531	0.00326337	0.0333118	1	1
ZC3H3	-3.23746	-0.706888	0.00284733	0.0292155	1	1
SRP68	-3.2217	-0.906841	0.00474331	0.0475259	1	1
TRMT10C	-3.21933	-0.791825	0.00363674	0.0369749	1	1
MRPL15	-3.19697	-0.839441	0.00429009	0.0431989	1	1
NPEPPS	-3.195	-0.799891	0.00392614	0.0397812	1	1
ORC5	-3.19475	-0.853703	0.00445987	0.0447569	1	1
PPP2R4	-3.18715	-0.890909	0.00495541	0.0495069	1	1
CAB39	-3.18354	-0.831571	0.00434667	0.0437439	1	1
NUDT5	-3.17824	-0.815756	0.00424021	0.0427691	1	1
RAB7A	-3.16755	-0.787615	0.00406931	0.0411383	1	1
HSP90AB1	-3.15836	-0.743971	0.00375136	0.0380318	1	1
COQ6	-3.1377	-0.975316	0.00678035	0.066546	1	1
CLASP2	-3.12872	-0.891994	0.00569801	0.0563888	1	1
HSPA8	-3.12608	-0.899466	0.00583453	0.0576119	1	1
SLU7	-3.11955	-0.924603	0.00628337	0.0618385	1	1
TMEM242	-3.10266	-0.812571	0.00502754	0.0501714	1	1
C20orf196	-3.08971	-0.699996	0.00397653	0.0402688	1	1
SNRPB2	-3.07719	-0.697245	0.00406918	0.0411383	1	1
NFE2L3	-3.05988	-0.205564	0.00129858	0.0138751	0.652149	1
SFXN4	-3.05628	-0.629276	0.00364105	0.0369976	1	1
DHPS	-3.05566	-0.784128	0.00525144	0.0522991	1	1
FARS2	-3.05522	-0.613765	0.0035186	0.0358351	1	1
CHD1	-3.05478	-0.680432	0.00412325	0.0416365	1	1
SRP9	-3.04825	-1.11015	0.0114319	0.109018	1	1
CTAGE5	-3.04424	-0.693126	0.0043554	0.0437823	1	1
NSUN4	-3.03264	-0.603005	0.00361844	0.0368099	1	1
UBE2E2	-3.02777	-0.383581	0.00216889	0.022579	1	1
SUPT7L	-3.02151	-0.848584	0.00661543	0.0649988	1	1
MRE11A	-3.02136	-1.0449	0.0104568	0.100148	1	1
GIGYF2	-3.02072	-0.575512	0.00348751	0.0355591	1	1
NARS	-3.00408	-0.739478	0.00533752	0.0529978	1	1
PITX1	-3.00097	-0.450419	0.00271482	0.027904	1	1
VMA21	-3.00062	-0.780005	0.00591703	0.058362	1	1
TFG	-2.98998	-0.638336	0.00434993	0.043752	1	1
LARP1	-2.9841	-0.883118	0.00782531	0.0760898	1	1
NEMF	-2.98399	-0.558736	0.00365621	0.0371306	1	1
MED10	-2.97647	-0.715766	0.00538655	0.0534548	1	1
SOS1	-2.96643	-0.58716	0.00407573	0.0411799	1	1
TUBD1	-2.96422	-1.05034	0.0120932	0.11475	1	1
PRKDC	-2.95689	-0.882209	0.0083202	0.0806381	1	1
EIF3E	-2.95663	-1.00368	0.0110444	0.105436	1	1
ORC2	-2.95335	-1.02906	0.0118047	0.112154	1	1
XRCC2	-2.94003	-1.01188	0.0116994	0.111272	1	1
FAM193A	-2.93115	-0.548878	0.00404697	0.040959	1	1
TOPBP1	-2.91927	-0.723245	0.00626753	0.0617167	1	1
ZFP36L2	-2.91713	-0.55859	0.00427991	0.043145	1	1
MRPL48	-2.91496	-0.792041	0.00743498	0.0724921	1	1
CRCP	-2.91309	-0.642237	0.00525976	0.0523423	1	1
SETD2	-2.91309	-0.899696	0.00959629	0.0923035	1	1
SCAI	-2.90051	-0.829885	0.00839916	0.0812709	1	1
FUT3	-2.89939	-0.584576	0.00474379	0.0475259	1	1
SLC4A1AP	-2.89883	-0.652036	0.00556508	0.0551651	1	1
RBBP5	-2.89584	-1.00077	0.012633	0.119388	1	1
SDHB	-2.89442	-0.805355	0.00804576	0.0781056	1	1
ZSWIM8	-2.88195	-0.612768	0.00528046	0.0524896	1	1
SWI5	-2.87352	-0.781886	0.00799769	0.0777236	1	1
SDHD	-2.8723	-0.746943	0.00739279	0.0721201	1	1
ABHD13	-2.85819	-0.70204	0.00687985	0.0674111	1	1
MRPL49	-2.85185	-0.71939	0.00727128	0.0709736	1	1
ACTR8	-2.84223	-0.917681	0.0117973	0.112144	1	1
WDR20	-2.83768	-0.763475	0.00832936	0.080683	1	1
ILF2	-2.83749	-0.56605	0.00525249	0.0522991	1	1
MRFAP1	-2.83209	-0.488716	0.0044355	0.0445373	1	1
CRIPT	-2.81475	-0.865078	0.0111288	0.106185	1	1
RFC5	-2.80673	-0.579043	0.00581986	0.0574989	1	1
B4GALT7	-2.80513	-0.649412	0.0068869	0.0674432	1	1
TAF1B	-2.80002	-0.864797	0.0115085	0.10969	1	1
SMS	-2.79959	-0.690196	0.00767337	0.0746939	1	1
LOC101927572	-2.79889	-0.500131	0.00492621	0.0492427	1	1
RPL36	-2.77635	-0.725254	0.00878997	0.0849602	1	1
GMEB1	-2.77224	-0.656997	0.00756926	0.0737207	1	1
SLC12A7	-2.77131	-0.574531	0.00625657	0.0616428	1	1
GOLGA2	-2.77076	-0.612031	0.00683852	0.067043	1	1
VPS11	-2.76961	-0.532625	0.00569452	0.0563855	1	1
ACTG1	-2.7664	-0.755163	0.00964468	0.092669	1	1
COX18	-2.76088	-0.736242	0.00934851	0.0902121	1	1
COPS2	-2.7527	-0.818099	0.0115252	0.109791	1	1
FPGS	-2.75142	-0.662042	0.00804002	0.0780924	1	1
UBA6	-2.73545	-0.59613	0.00715564	0.0699214	1	1
C1QBP	-2.72932	-0.542816	0.0064087	0.0630024	1	1
PRMT3	-2.7282	-0.370031	0.00428356	0.0431575	1	1
FUS	-2.71718	-0.867645	0.0140404	0.131988	1	1
NUF2	-2.71321	-0.738756	0.0105058	0.100564	1	1
POLD1	-2.71003	-0.97446	0.0182835	0.168588	1	1
DNAJB11	-2.70395	-0.719351	0.010261	0.0983788	1	1
METAP2	-2.70279	-0.465003	0.00568376	0.0563102	1	1
GFPT1	-2.70044	-0.685605	0.00956428	0.0920452	1	1
RFWD3	-2.69633	-1.00258	0.0201418	0.184199	1	1
TNNI3	-2.68829	-0.540136	0.0070096	0.0685612	1	1
negConGene159	-2.6791	-0.603461	0.00830153	0.0805009	1	1
SAMHD1	-2.67566	-0.513553	0.00678477	0.0665527	1	1
CYFIP1	-2.6705	-0.701273	0.0106342	0.101738	1	1
WDR26	-2.66862	-0.771539	0.0125743	0.119022	1	1
EGLN1	-2.66817	-0.588286	0.00821978	0.0797515	1	1
NKTR	-2.66593	-0.63314	0.00917278	0.0886122	1	1
RHOT2	-2.66453	-0.860175	0.0155909	0.145349	1	1
FAAP24	-2.66147	-0.643063	0.00948511	0.091382	1	1
ZCCHC2	-2.66145	-0.544186	0.00753368	0.0734142	1	1
ZBTB14	-2.65977	-0.826606	0.0145839	0.136772	1	1
RTEL1	-2.65933	-0.637479	0.00940931	0.0907498	1	1
AP1M1	-2.65857	-0.631522	0.00929618	0.0897557	1	1
PKM	-2.64761	-0.752379	0.0126281	0.119388	1	1
FAM210A	-2.63285	-0.560715	0.00836965	0.0810293	1	1
TMCO6	-2.63082	-0.852616	0.0165647	0.153853	1	1
EPC1	-2.62888	-0.671384	0.0109281	0.104382	1	1
AKT2	-2.62652	-0.562796	0.00853527	0.0825431	1	1
RABIF	-2.62632	-0.610301	0.00953788	0.0918407	1	1
PCDHA6	-2.62623	-0.323218	0.0048772	0.0487803	1	1
MAD1L1	-2.62545	-0.831098	0.0159563	0.148667	1	1
CENPP	-2.62182	-0.773381	0.0140764	0.132187	1	1
PGAM5	-2.61073	-0.612661	0.00994456	0.0954988	1	1
MIB1	-2.59191	-0.321404	0.00526405	0.0523557	0.733804	1
TCF12	-2.58665	-0.672918	0.0120973	0.11475	1	1
CSPG5	-2.58042	-0.416156	0.00675074	0.0662918	1	1
BASP1	-2.57814	-0.737407	0.01433	0.134498	1	1
MICU3	-2.5709	-0.372376	0.00623112	0.0614259	1	1
INTS12	-2.55539	-0.703274	0.0139566	0.13127	1	1
CCDC137	-2.55417	-0.662026	0.0127191	0.120138	1	1
HIPK1	-2.54552	-0.765472	0.0164939	0.153355	1	1
RSL1D1	-2.52467	-0.503602	0.00942638	0.0908652	1	1
PIM2	-2.51583	-0.250225	0.00532494	0.0529023	1	1
DPM1	-2.51571	-0.37969	0.00721105	0.0704242	1	1
ELFN2	-2.51341	-0.406521	0.00771826	0.0750898	1	1
AVEN	-2.50214	-0.722461	0.0165082	0.153409	1	1
GABRG2	-2.49885	-0.0748774	0.00366731	0.037222	0.730088	1
SURF1	-2.49489	-0.662712	0.014617	0.136976	1	1
MTF1	-2.49161	-0.642524	0.0140551	0.132057	1	1
MMD	-2.47665	-0.493327	0.0102916	0.0986189	1	1
KIF4B	-2.46511	-0.696414	0.0169336	0.157034	1	1
MRPL30	-2.46469	-0.5791	0.0129139	0.121784	0.295878	1
PEX11B	-2.46446	-0.566282	0.0125421	0.11878	1	1
SPIN1	-2.46404	-0.716477	0.0177828	0.164229	1	1
YTHDC2	-2.46209	-0.657771	0.015592	0.145349	1	1
FANCD2	-2.4614	-0.44915	0.00962177	0.0924987	0.661796	1
ALG14	-2.45292	-1.02953	0.0376238	0.329056	1	1
COX5B	-2.44658	-0.713181	0.0183757	0.169263	1	1
CALR	-2.43921	-0.606162	0.0145876	0.136772	1	1
NUP214	-2.43545	-0.773209	0.0216649	0.197017	1	1
DDX19A	-2.42221	-0.661984	0.0172689	0.159977	1	1
SHC1	-2.42201	-0.590956	0.0146552	0.137262	1	1
PEBP4	-2.42011	-0.535466	0.0129425	0.121989	1	1
SRF	-2.40618	-0.65875	0.0177883	0.164229	1	1
CTDSPL2	-2.40264	-0.744119	0.0218523	0.198316	1	1
IRF2BP2	-2.39885	-0.828689	0.0268052	0.239968	1	1
ATAD3B	-2.39807	-0.650735	0.0177924	0.164229	1	1
RANBP1	-2.38877	-0.568398	0.0150228	0.140483	1	1
AP3B1	-2.38621	-0.503684	0.013006	0.122475	1	1
BRPF1	-2.38244	-0.45292	0.0116618	0.111033	1	1
XYLT2	-2.37019	-0.616245	0.0175219	0.162153	1	1
APEX1	-2.36746	-0.702548	0.0215314	0.196003	1	1
USP7	-2.35804	-0.840011	0.0302366	0.269335	1	1
FERMT2	-2.3554	-0.594705	0.0172502	0.159887	1	1
EHMT1	-2.35469	-0.757671	0.0251917	0.226091	1	1
VPS25	-2.35456	-0.392346	0.0108089	0.103354	1	1
HIST1H4B	-2.34468	-0.35653	0.0101765	0.0976212	1	1
ANKRD13C	-2.33564	-0.616367	0.0189864	0.174438	1	1
C1orf168	-2.32855	-0.428943	0.0125005	0.11845	1	1
POLE4	-2.31456	-0.353282	0.0108326	0.103525	1	1
MORF4L2	-2.30358	-0.661111	0.0226788	0.205087	1	1
ATP5I	-2.30178	-0.580498	0.0188986	0.173811	1	1
CNOT4	-2.30173	-0.475406	0.0148169	0.138704	1	1
PIM1	-2.29577	-0.51351	0.0164097	0.152731	1	1
EIF4A3	-2.29429	-0.61876	0.0210091	0.191705	1	1
PPP1R10	-2.28752	-0.576448	0.0193505	0.177418	1	1
FAM189B	-2.28531	-0.356288	0.0116755	0.111104	1	1
RNF31	-2.28305	-0.392825	0.0127759	0.120546	1	1
ABCB7	-2.28007	-0.550769	0.0185507	0.170787	1	1
PIGL	-2.27842	-0.64589	0.0232059	0.209535	1	1
TFAM	-2.27824	-0.76664	0.0306893	0.272788	1	1
KATNB1	-2.27667	-0.567498	0.0194355	0.178105	1	1
MRPL27	-2.27017	-0.879174	0.0405448	0.352185	1	1
ATL2	-2.26755	-0.680672	0.0257896	0.231341	1	1
FAM204A	-2.26607	-0.482171	0.0163474	0.152232	1	1
TBC1D20	-2.26476	-0.796019	0.033883	0.299423	1	1
INO80C	-2.2589	-0.583513	0.0210163	0.191705	1	1
GCNT2	-2.25569	-0.373218	0.0130078	0.122475	1	1
GEMIN8	-2.25465	-0.784626	0.0337822	0.298681	1	1
FNDC3B	-2.25435	-0.890737	0.0431896	0.372617	1	1
C1orf27	-2.25347	-0.525175	0.0185939	0.171097	1	1
KDM3B	-2.25277	-0.518031	0.0183187	0.168826	1	1
aavs1Gene100	-2.2454	-0.349148	0.0125984	0.119187	1	1
CLPP	-2.24159	-0.549506	0.0202197	0.184817	1	1
YBEY	-2.23458	-0.572575	0.0216766	0.197023	1	1
PIK3CA	-2.22802	-0.452497	0.016668	0.154652	1	1
SNRNP70	-2.21161	-0.602037	0.0244712	0.22029	1	1
CLPSL2	-2.20772	-0.398394	0.0154122	0.143898	1	1
MGEA5	-2.20609	-0.643892	0.0273032	0.244059	1	1
NUP98	-2.20288	-0.444899	0.0173589	0.160727	1	1
TMEM41B	-2.20095	-0.453007	0.0177673	0.164229	1	1
TGIF1	-2.18991	-0.813284	0.0419124	0.363003	1	1
E2F2	-2.18546	-0.476849	0.019461	0.178248	1	1
C22orf46	-2.18512	-0.464992	0.0189491	0.174186	1	1
KMT2B	-2.18006	-0.617483	0.0272796	0.243971	1	1
RBFOX2	-2.17877	-0.355227	0.0149126	0.139526	1	1
RPS7	-2.17754	-0.48569	0.0202306	0.184822	1	1
MRPS31	-2.17496	-0.503217	0.0211942	0.193229	1	1
NCAPG2	-2.17419	-0.474898	0.0198851	0.182038	1	1
HLCS	-2.16563	-0.564449	0.0249507	0.224267	0.368968	1
ATMIN	-2.16398	-0.519605	0.0225789	0.204391	1	1
RPS6KB1	-2.16004	-0.446594	0.0192444	0.176536	1	1
POT1	-2.15974	-0.513712	0.0224928	0.203715	1	1
CCNE2	-2.15924	-0.797027	0.0433293	0.373642	1	1
PARN	-2.15415	-0.489542	0.0215468	0.196043	1	1
RPP30	-2.14756	-0.584567	0.0272528	0.243853	1	1
LIG1	-2.14305	-0.90218	0.0573289	0.48133	1	1
AXL	-2.13784	-0.481974	0.0219868	0.199436	1	1
NDUFS3	-2.13712	-0.778285	0.0436691	0.376023	1	1
SP2	-2.13705	-0.465658	0.0212112	0.193285	1	1
XPNPEP3	-2.1363	-0.24507	0.012746	0.120328	1	1
HS6ST1	-2.13124	-0.482943	0.0223753	0.202753	1	1
ZFP36L1	-2.12513	-0.269389	0.0138399	0.130241	1	1
WBSCR22	-2.12264	-0.702817	0.0379344	0.331448	1	1
BOLA3	-2.12239	-0.632025	0.0322322	0.286111	1	1
FECH	-2.12114	-0.493996	0.0234968	0.212054	1	1
PABPC1	-2.10982	-0.538824	0.0267537	0.239627	1	1
EWSR1	-2.10849	-0.63736	0.0336961	0.298067	1	1
SLC16A3	-2.1068	-0.583962	0.029903	0.26663	1	1
KIAA0556	-2.10596	-0.196926	0.0122302	0.11595	0.568524	1
WRAP73	-2.10273	-0.462222	0.022782	0.205915	1	1
SMG1	-2.09886	-0.911562	0.0648684	0.535059	1	1
USP15	-2.09658	-0.574383	0.0299471	0.26689	1	1
GTPBP3	-2.09175	-0.743748	0.0447743	0.384244	1	1
SENP3	-2.0908	-0.613742	0.0332381	0.294454	1	1
SMAD3	-2.08914	-0.40642	0.0206626	0.188672	1	1
SCAF11	-2.07158	-0.411522	0.0217746	0.197813	1	1
USP36	-2.07052	-0.355541	0.0191761	0.176	1	1
HIF3A	-2.07	-0.61302	0.0348158	0.306958	1	1
LGSN	-2.06874	-0.287711	0.0164568	0.15309	1	1
RPAP3	-2.06611	-0.552555	0.0305508	0.271863	1	1
RRBP1	-2.06529	-0.535743	0.0294428	0.262658	1	1
DRG2	-2.06472	-0.607821	0.0348218	0.306958	1	1
TRAM2	-2.06228	-0.501186	0.0273728	0.244559	1	1
SYT10	-2.05655	-0.307219	0.0177101	0.163809	1	1
ATF7	-2.05604	-0.435756	0.0238725	0.215336	1	1
REST	-2.05514	-0.250636	0.0155855	0.145349	1	1
CWC27	-2.05399	-0.569378	0.0326633	0.289505	1	1
DPM3	-2.05095	-0.64569	0.0392313	0.341108	1	1
[truncated: 15,834 more rows]

## Sheet: HeLa_Day 21
Gene	Fitness Score	ZLFC	RRA_depletion	RRA_depletion_FDR	RRA_enrichment	RRA_enrichment_FDR
ZNHIT2	-16.9944	-12.9944	1.42031e-44	2.53283e-40	1	1
YAE1D1	-16.8198	-12.8198	6.13917e-39	1.08088e-35	1	1
EIF2B2	-16.5779	-12.5779	5.96929e-44	5.32252e-40	1	1
TRAPPC8	-16.3357	-12.3357	4.82404e-41	1.43378e-37	1	1
RUVBL1	-16.3146	-12.3146	1.37322e-41	4.89773e-38	1	1
SMC4	-16.0979	-12.0979	1.4661e-43	8.715e-40	1	1
TRAPPC1	-15.3175	-11.3175	3.1976e-40	8.14612e-37	1	1
ZFC3H1	-15.2324	-11.2324	2.98283e-34	1.47758e-31	1	1
EIF3G	-15.1105	-11.1105	4.68182e-31	1.00592e-28	1	1
OIP5	-14.9624	-10.9624	7.83799e-42	3.49437e-38	1	1
CCDC84	-14.8169	-10.8169	1.21582e-30	2.40908e-28	1	1
CIAO1	-14.6605	-10.6605	4.41326e-36	4.1422e-33	1	1
WDR18	-14.6503	-10.6503	2.71358e-29	4.13601e-27	1	1
MCM5	-14.6441	-10.6441	4.09479e-36	4.0568e-33	1	1
SART3	-14.5007	-10.5007	5.26682e-40	1.17404e-36	1	1
SF3B2	-14.4962	-10.4962	1.31056e-35	1.16856e-32	1	1
PDCD7	-14.4769	-10.4769	5.7134e-29	8.28351e-27	1	1
EMC3	-14.4266	-10.4266	1.02682e-39	2.03458e-36	1	1
WDR74	-14.397	-10.397	4.59216e-30	8.02862e-28	1	1
ALG1	-14.3369	-10.3369	1.18177e-36	1.40496e-33	1	1
TUBG1	-14.3202	-10.3202	1.30424e-36	1.45366e-33	1	1
ISCA2	-14.2908	-10.2908	4.80942e-34	2.19914e-31	1	1
GRWD1	-14.2637	-10.2637	1.13539e-29	1.87476e-27	1	1
NFS1	-14.2088	-10.2088	2.18482e-32	6.71756e-30	1	1
TWISTNB	-14.1963	-10.1963	2.01018e-36	2.10868e-33	1	1
UHRF1	-14.172	-10.172	8.39119e-37	1.06886e-33	1	1
TRIAP1	-14.1702	-10.1702	1.9445e-29	3.04178e-27	1	1
RNF113A	-14.1054	-10.1054	9.20943e-33	3.04133e-30	1	1
POLR3D	-14.0615	-10.0615	2.85274e-37	3.9133e-34	1	1
PREB	-13.9854	-9.98537	1.01404e-28	1.42389e-26	1	1
METTL17	-13.909	-9.90896	7.63556e-34	3.3211e-31	1	1
PSMC2	-13.7796	-9.77957	6.66722e-39	1.08088e-35	1	1
HSD17B12	-13.6682	-9.66821	2.8975e-38	4.30592e-35	1	1
PSMD14	-13.6433	-9.6433	3.14482e-33	1.09964e-30	1	1
CDC73	-13.5703	-9.57035	5.07205e-35	4.11136e-32	1	1
DDX24	-13.5697	-9.56966	8.62351e-35	5.68007e-32	1	1
POLR2I	-13.5374	-9.53738	4.29757e-35	3.64945e-32	1	1
SF3B4	-13.5354	-9.53538	1.16775e-33	4.52704e-31	1	1
MRPS18C	-13.5271	-9.5271	4.58847e-34	2.15332e-31	1	1
WDR12	-13.4569	-9.45693	8.76978e-35	5.68007e-32	1	1
CCS	-13.4554	-9.45545	1.76513e-31	4.08798e-29	1	1
SETD1B	-13.3318	-9.33183	6.19243e-32	1.69892e-29	1	1
PSMB5	-13.3084	-9.30835	9.96076e-34	4.03705e-31	1	1
YARS2	-13.2787	-9.27869	1.01207e-31	2.6157e-29	1	1
PHB2	-13.2614	-9.26137	2.05443e-32	6.42749e-30	1	1
RPS19	-13.2052	-9.20519	1.54995e-28	2.07821e-26	1	1
MCM2	-13.1503	-9.15031	1.91925e-33	6.98491e-31	1	1
CAD	-13.0868	-9.08677	1.31048e-34	7.78991e-32	1	1
COPA	-13.0627	-9.06272	8.30058e-35	5.68007e-32	1	1
MRPL33	-13.0361	-9.03613	1.44085e-25	1.29771e-23	1	1
UBA2	-13.0319	-9.03194	3.59815e-26	3.56477e-24	1	1
MED11	-13.0166	-9.01663	3.97854e-31	8.75918e-29	1	1
OGT	-12.9093	-8.90932	3.07442e-28	3.91616e-26	1	1
PES1	-12.9025	-8.90247	2.54583e-26	2.56496e-24	1	1
NAA10	-12.8867	-8.88672	9.33735e-26	8.85707e-24	1	1
ZNF830	-12.8828	-8.88276	8.91841e-35	5.68007e-32	1	1
CLNS1A	-12.8611	-8.86112	4.05763e-33	1.39153e-30	1	1
MRPL34	-12.8206	-8.8206	1.2692e-32	4.11521e-30	1	1
NOP56	-12.7967	-8.79665	3.64015e-24	2.93387e-22	1	1
RPL23	-12.6683	-8.66828	6.0626e-31	1.25714e-28	1	1
SRSF1	-12.6493	-8.64931	2.70082e-28	3.51561e-26	1	1
EIF2B5	-12.6311	-8.63111	9.21871e-29	1.31518e-26	1	1
NUP133	-12.6139	-8.61393	1.61789e-31	3.8469e-29	1	1
MED12	-12.6088	-8.60878	3.4689e-24	2.81186e-22	1	1
ATP6V0B	-12.5684	-8.56843	6.53039e-31	1.33858e-28	1	1
MPI	-12.5665	-8.56647	1.90832e-32	6.07697e-30	1	1
NCAPG	-12.5559	-8.55588	6.06397e-30	1.0398e-27	1	1
MRPL18	-12.5461	-8.54609	1.2414e-21	8.13894e-20	1	1
RPLP0	-12.5275	-8.52747	3.65232e-24	2.93387e-22	1	1
TOP1	-12.5149	-8.51486	3.69141e-34	1.77916e-31	1	1
EXOSC4	-12.467	-8.46699	3.4636e-30	6.30269e-28	1	1
RPS2	-12.4651	-8.46513	1.39413e-28	1.89783e-26	1	1
PELO	-12.392	-8.39202	2.5355e-31	5.79687e-29	1	1
RPS11	-12.3821	-8.38213	1.81989e-23	1.33556e-21	1	1
HSPA9	-12.3747	-8.3747	7.69478e-29	1.10662e-26	1	1
NAE1	-12.3619	-8.36194	2.44868e-34	1.34907e-31	1	1
BUB3	-12.3497	-8.34968	5.49355e-29	8.0964e-27	1	1
ELL	-12.3415	-8.34154	3.47159e-32	9.82679e-30	1	1
TUT1	-12.3322	-8.33224	2.7756e-34	1.41421e-31	1	1
THAP1	-12.3138	-8.31382	1.36885e-23	1.02566e-21	1	1
CDK7	-12.3025	-8.30245	2.27354e-34	1.30787e-31	1	1
TXNL4A	-12.2761	-8.27609	1.2627e-23	9.58342e-22	1	1
DIEXF	-12.257	-8.25702	2.58637e-34	1.35655e-31	1	1
EIF5A	-12.254	-8.25397	2.53731e-21	1.59886e-19	1	1
USP39	-12.2457	-8.24571	3.3853e-21	2.09618e-19	1	1
DTYMK	-12.2322	-8.2322	1.06677e-34	6.55988e-32	1	1
TIMM22	-12.2046	-8.20457	1.3018e-23	9.83689e-22	1	1
RSL24D1	-12.2007	-8.20071	1.16336e-30	2.33103e-28	1	1
EMC7	-12.1657	-8.16567	4.30087e-24	3.40877e-22	1	1
DHX35	-12.1526	-8.15265	7.67154e-18	3.24956e-16	1	1
GTF3C1	-12.1502	-8.1502	6.88283e-26	6.63468e-24	1	1
TRMT112	-12.1475	-8.14748	2.47837e-22	1.71305e-20	1	1
RARS2	-12.1337	-8.13369	3.83467e-20	2.13033e-18	1	1
BNIP1	-12.0799	-8.07987	2.88958e-32	8.31127e-30	1	1
AAMP	-12.0748	-8.07484	1.73272e-30	3.32253e-28	1	1
MRPS26	-12.0737	-8.07367	1.84806e-26	1.905e-24	1	1
DDX10	-12.0677	-8.06771	1.20351e-33	4.56643e-31	1	1
TYMS	-12.0485	-8.04851	4.10858e-23	2.95437e-21	1	1
RPLP2	-12.0197	-8.01975	1.15396e-20	6.81408e-19	1	1
SF3A2	-12.0174	-8.01736	3.89653e-31	8.68586e-29	1	1
UTP23	-12.0046	-8.00456	1.23654e-22	8.64754e-21	1	1
PPP1R12A	-11.9793	-7.97933	6.8873e-35	5.11755e-32	1	1
RPS5	-11.9745	-7.97453	2.35703e-25	2.10165e-23	1	1
UQCRC1	-11.9652	-7.96525	2.08937e-27	2.34338e-25	1	1
SLC7A6OS	-11.9616	-7.9616	6.97635e-22	4.62488e-20	1	1
DYNLRB1	-11.9539	-7.95386	4.41512e-21	2.70567e-19	1	1
MDN1	-11.9156	-7.9156	1.11431e-33	4.41591e-31	1	1
INTS6	-11.8916	-7.89162	2.53412e-19	1.2588e-17	1	1
CDC16	-11.8579	-7.85789	8.96733e-34	3.80501e-31	1	1
GAR1	-11.8516	-7.85161	2.37328e-21	1.50081e-19	1	1
PSMA1	-11.8486	-7.84858	2.59069e-32	7.69997e-30	1	1
PSMB3	-11.8454	-7.84537	3.37974e-20	1.88347e-18	1	1
EXOSC7	-11.8355	-7.83554	6.41924e-18	2.74519e-16	1	1
TOMM22	-11.8194	-7.81941	1.69516e-31	3.97761e-29	1	1
GINS2	-11.8002	-7.8002	1.12186e-18	5.27866e-17	1	1
WDR77	-11.7867	-7.78669	2.964e-17	1.16169e-15	1	1
HYOU1	-11.785	-7.78497	1.41194e-21	9.18945e-20	1	1
HAUS3	-11.7716	-7.77159	3.29888e-30	6.12801e-28	1	1
DNAJC17	-11.7625	-7.76253	2.49646e-34	1.34907e-31	1	1
PFDN6	-11.7618	-7.76181	3.28973e-27	3.57718e-25	1	1
GNB1L	-11.7583	-7.75826	5.4637e-30	9.45963e-28	1	1
INTS5	-11.7477	-7.74773	5.48896e-35	4.25585e-32	1	1
SNAPC5	-11.7457	-7.7457	1.56331e-21	1.00644e-19	1	1
MEPCE	-11.7285	-7.72851	7.9696e-20	4.30672e-18	1	1
MED20	-11.7048	-7.70482	1.9767e-29	3.06527e-27	1	1
RPL7	-11.6891	-7.68913	2.57188e-22	1.77083e-20	1	1
FAU	-11.6792	-7.67924	1.7789e-20	1.01029e-18	1	1
CACTIN	-11.6612	-7.66121	1.10558e-31	2.77687e-29	1	1
RPL24	-11.6504	-7.65045	3.11935e-19	1.52404e-17	1	1
SCO1	-11.6238	-7.6238	1.18929e-25	1.08532e-23	1	1
RPS4X	-11.6206	-7.62062	9.94128e-21	5.8898e-19	1	1
ANAPC4	-11.6195	-7.61951	5.72357e-25	4.93085e-23	1	1
HJURP	-11.6185	-7.61852	2.00473e-20	1.13134e-18	1	1
AHCY	-11.6109	-7.61085	5.30697e-22	3.55787e-20	1	1
SRSF3	-11.6015	-7.60151	5.58967e-29	8.17054e-27	1	1
CENPI	-11.6005	-7.60048	1.5459e-31	3.77644e-29	1	1
EIF2B3	-11.5949	-7.59492	5.06491e-31	1.07527e-28	1	1
COX11	-11.5901	-7.59012	6.50089e-25	5.54691e-23	1	1
HARS	-11.5874	-7.58745	1.06667e-19	5.6445e-18	1	1
SNAPC2	-11.5824	-7.58237	3.7507e-24	2.99938e-22	1	1
DCTN5	-11.5803	-7.58029	9.17486e-34	3.80501e-31	1	1
RBFA	-11.5658	-7.56583	2.14448e-19	1.07423e-17	1	1
YY1	-11.5433	-7.54332	5.2668e-19	2.53161e-17	1	1
INTS9	-11.523	-7.52304	2.57718e-32	7.69997e-30	1	1
UNC45A	-11.5178	-7.51781	6.44186e-21	3.88101e-19	1	1
TUBGCP5	-11.4667	-7.46667	5.3989e-34	2.40696e-31	1	1
CHEK1	-11.4541	-7.4541	1.57083e-31	3.7855e-29	1	1
GPN2	-11.4513	-7.45125	2.46218e-33	8.78163e-31	1	1
NUDCD3	-11.4302	-7.43019	1.50594e-23	1.12365e-21	1	1
SNRPE	-11.427	-7.42702	4.51534e-22	3.05008e-20	1	1
KIF4A	-11.4032	-7.40317	1.34568e-30	2.63709e-28	1	1
RPS20	-11.3938	-7.39381	1.31394e-18	6.13391e-17	1	1
VPS13D	-11.3795	-7.37947	8.47064e-27	9.04532e-25	1	1
PSMG3	-11.3774	-7.37737	1.13493e-25	1.04326e-23	1	1
EIF3B	-11.3716	-7.37155	2.04986e-26	2.10087e-24	1	1
MAX	-11.3535	-7.35355	5.66492e-20	3.08937e-18	1	1
NDUFAB1	-11.3519	-7.35186	6.43945e-26	6.24101e-24	1	1
POLR2B	-11.3179	-7.31795	3.92237e-29	5.87795e-27	1	1
CCAR1	-11.3139	-7.31391	4.49502e-22	3.04789e-20	1	1
MRPS6	-11.3139	-7.31389	4.36379e-25	3.81468e-23	1	1
LAMTOR2	-11.3049	-7.30487	7.82677e-32	2.08321e-29	1	1
UTP15	-11.2937	-7.29369	1.42811e-19	7.38189e-18	1	1
SRP72	-11.2874	-7.28739	2.26489e-21	1.43736e-19	1	1
RPL18A	-11.27	-7.26998	1.35185e-18	6.26169e-17	1	1
EIF3I	-11.2612	-7.26119	1.05583e-25	9.80656e-24	1	1
GPKOW	-11.2551	-7.25506	2.82578e-19	1.3959e-17	1	1
EIF4G1	-11.2484	-7.24837	1.52096e-18	6.99052e-17	1	1
PSMA4	-11.2146	-7.2146	4.34388e-28	5.37947e-26	1	1
SURF6	-11.21	-7.20997	3.64405e-30	6.56407e-28	1	1
CYC1	-11.1954	-7.19542	3.18891e-31	7.19846e-29	1	1
NAF1	-11.187	-7.18702	6.74243e-25	5.72561e-23	1	1
SRM	-11.1763	-7.17629	1.52994e-33	5.68405e-31	1	1
TMED10	-11.1355	-7.13548	4.4652e-20	2.46526e-18	1	1
ADSS	-11.1311	-7.13111	6.76789e-30	1.14228e-27	1	1
ALDOA	-11.1305	-7.13046	2.68632e-19	1.3307e-17	1	1
SARS	-11.1238	-7.12379	6.23538e-24	4.8711e-22	1	1
FNTB	-11.119	-7.11898	1.07413e-24	8.90928e-23	1	1
GLTSCR2	-11.0689	-7.06885	4.53245e-29	6.7356e-27	1	1
CCDC86	-11.0396	-7.03962	1.47111e-19	7.56031e-18	1	1
RNPC3	-11.0312	-7.03116	1.03256e-31	2.63053e-29	1	1
MRPL3	-11.027	-7.02701	2.53309e-28	3.34612e-26	1	1
MYC	-10.9972	-6.99718	2.82727e-32	8.26537e-30	1	1
RFC3	-10.9919	-6.99189	4.66616e-18	2.0395e-16	1	1
AFG3L2	-10.9773	-6.9773	2.88773e-23	2.09337e-21	1	1
EIF4A1	-10.9683	-6.96826	1.56319e-19	7.96468e-18	1	1
POLR1C	-10.9353	-6.9353	4.90519e-20	2.68326e-18	1	1
GEMIN5	-10.9164	-6.91635	1.24817e-24	1.02574e-22	1	1
METTL14	-10.9096	-6.90959	2.73946e-18	1.22438e-16	1	1
TIMM13	-10.9042	-6.90418	1.37118e-19	7.1082e-18	1	1
DHX30	-10.8863	-6.88629	1.20174e-20	7.07282e-19	1	1
RAD1	-10.8789	-6.87887	1.5579e-20	8.93315e-19	1	1
RPS8	-10.8778	-6.8778	2.05811e-19	1.03679e-17	1	1
MVK	-10.8768	-6.87682	1.49164e-28	2.01518e-26	1	1
XPO1	-10.8734	-6.8734	3.29953e-26	3.28718e-24	1	1
ENO1	-10.8718	-6.87184	4.71187e-20	2.58544e-18	1	1
RPS13	-10.8513	-6.85127	6.60929e-32	1.78581e-29	1	1
MED18	-10.8503	-6.85032	1.05213e-26	1.11682e-24	1	1
RAN	-10.8452	-6.84522	1.13606e-18	5.33142e-17	1	1
MRPL38	-10.84	-6.84001	1.61184e-30	3.12433e-28	1	1
CIAPIN1	-10.8354	-6.83542	4.48625e-20	2.46924e-18	1	1
PDE12	-10.8275	-6.82747	5.33603e-32	1.48683e-29	1	1
WDR25	-10.8253	-6.82527	1.00228e-28	1.41854e-26	1	1
AK6	-10.8236	-6.8236	2.31521e-19	1.1565e-17	1	1
RPL10A	-10.8206	-6.82057	1.4106e-20	8.19388e-19	1	1
DDOST	-10.8203	-6.82032	3.35387e-17	1.30304e-15	1	1
NKAP	-10.8103	-6.81029	1.4919e-19	7.64511e-18	1	1
DYNC1H1	-10.8074	-6.80735	1.37485e-31	3.40522e-29	1	1
RBX1	-10.7858	-6.78577	1.48656e-20	8.60709e-19	1	1
CPSF3L	-10.7643	-6.76434	3.47792e-18	1.53519e-16	1	1
PRPF38B	-10.7421	-6.74213	5.06458e-18	2.19748e-16	1	1
PRPF31	-10.7278	-6.7278	1.50238e-27	1.71743e-25	1	1
SNRNP40	-10.7146	-6.71457	4.7731e-22	3.21202e-20	0.94984	1
EXOSC3	-10.7081	-6.70812	1.84639e-18	8.35702e-17	1	1
HDAC8	-10.7075	-6.70753	1.32467e-19	6.90725e-18	1	1
TAF1C	-10.7015	-6.70146	1.11322e-28	1.55094e-26	1	1
TOE1	-10.6846	-6.68462	1.23968e-20	7.25171e-19	1	1
MED28	-10.6788	-6.67881	1.68739e-29	2.68402e-27	1	1
TIMELESS	-10.6781	-6.67808	1.52478e-19	7.79123e-18	1	1
RAD51	-10.6649	-6.66487	3.02515e-28	3.88111e-26	1	1
CENPT	-10.6628	-6.66285	7.79357e-28	9.1436e-26	1	1
PRMT5	-10.6626	-6.66259	1.50004e-20	8.65702e-19	1	1
RPS3	-10.6425	-6.64249	5.08905e-21	3.09737e-19	1	1
FCF1	-10.6399	-6.63987	8.88676e-20	4.77342e-18	1	1
MRPL45	-10.6379	-6.6379	1.14976e-21	7.56591e-20	1	1
POLE	-10.635	-6.63504	7.94092e-21	4.75203e-19	1	1
GOSR2	-10.6328	-6.63277	3.62325e-16	1.24978e-14	1	1
CCT8	-10.6151	-6.6151	3.16992e-17	1.23696e-15	1	1
KTI12	-10.6026	-6.60262	1.71784e-22	1.19665e-20	1	1
PUF60	-10.6	-6.60005	3.41276e-17	1.32304e-15	1	1
ATP2A2	-10.5965	-6.59653	5.67118e-27	6.09242e-25	1	1
TAF12	-10.5742	-6.57419	3.19371e-21	1.99138e-19	1	1
CHAF1A	-10.5534	-6.55345	9.82203e-23	6.92317e-21	1	1
RPS18	-10.5426	-6.54262	1.34614e-17	5.46826e-16	1	1
INTS1	-10.5401	-6.54006	1.98321e-20	1.12275e-18	1	1
TICRR	-10.5388	-6.53882	1.01751e-30	2.06196e-28	1	1
PPIL1	-10.5304	-6.53037	1.7538e-18	7.97846e-17	1	1
UBE2N	-10.5241	-6.52407	8.12128e-26	7.78638e-24	1	1
KIN	-10.5191	-6.5191	5.73301e-31	1.20279e-28	1	1
PSMG4	-10.505	-6.50501	5.05519e-28	6.1326e-26	1	1
GARS	-10.4988	-6.49884	1.66052e-18	7.59285e-17	1	1
PRPF38A	-10.4834	-6.48338	2.11595e-20	1.19034e-18	1	1
RPS23	-10.4783	-6.47834	3.26762e-24	2.6608e-22	1	1
HSP90B1	-10.4651	-6.46507	1.07736e-27	1.25573e-25	1	1
CINP	-10.4631	-6.46305	7.97211e-19	3.81144e-17	1	1
NACA	-10.461	-6.46097	3.35475e-30	6.16755e-28	1	1
BOP1	-10.4608	-6.46079	5.94623e-25	5.09804e-23	1	1
TUBB	-10.4577	-6.45767	4.54822e-28	5.59368e-26	1	1
RPS29	-10.4549	-6.45493	2.21667e-17	8.82368e-16	1	1
ATR	-10.4363	-6.43626	4.36634e-15	1.31086e-13	1	1
SYS1	-10.4323	-6.43228	1.82736e-19	9.23153e-18	0.376001	1
PCNA	-10.4142	-6.41417	4.15833e-17	1.6051e-15	1	1
TNPO3	-10.4076	-6.40759	1.35577e-27	1.56996e-25	1	1
RABGGTA	-10.4044	-6.40438	2.12837e-15	6.63552e-14	1	1
XPO5	-10.4001	-6.40011	4.99409e-14	1.32925e-12	1	1
PLK1	-10.3921	-6.3921	2.26253e-30	4.24713e-28	1	1
PPAN	-10.3797	-6.3797	1.51553e-16	5.48204e-15	1	1
PLK4	-10.3757	-6.3757	4.25865e-28	5.31081e-26	1	1
CSTF3	-10.3709	-6.37091	2.49343e-25	2.2122e-23	1	1
WDR73	-10.3618	-6.36178	1.28367e-19	6.71312e-18	1	1
SUPV3L1	-10.3604	-6.3604	2.92957e-18	1.30282e-16	1	1
CDS2	-10.3581	-6.35808	3.24131e-22	2.22317e-20	1	1
AIFM1	-10.3434	-6.34338	1.18796e-28	1.6296e-26	1	1
CARS	-10.3318	-6.33177	5.11055e-25	4.44568e-23	1	1
RAD21	-10.3154	-6.31537	6.72215e-11	1.3424e-09	1	1
DHX33	-10.2794	-6.27943	1.16601e-28	1.61189e-26	1	1
EIF3D	-10.2777	-6.27772	3.50053e-19	1.7056e-17	1	1
MCM3	-10.2774	-6.2774	5.5802e-25	4.83066e-23	1	1
HEXIM1	-10.2715	-6.27152	1.35918e-18	6.27936e-17	1	1
SNRPC	-10.2714	-6.27139	5.64252e-17	2.13185e-15	1	1
CPSF2	-10.2631	-6.26313	2.25013e-15	6.9907e-14	1	1
FDX1L	-10.2618	-6.2618	5.0421e-14	1.34003e-12	1	1
PGD	-10.2333	-6.23327	5.17112e-14	1.37023e-12	1	1
ATP6V0C	-10.232	-6.23205	2.69596e-28	3.51561e-26	1	1
MRPL52	-10.2314	-6.23145	1.57538e-19	8.00391e-18	1	1
MAK16	-10.2227	-6.22268	4.27337e-13	1.02843e-11	1	1
TTC1	-10.2195	-6.2195	1.54922e-29	2.51157e-27	1	1
ZC3H13	-10.2174	-6.21737	4.03363e-19	1.94937e-17	1	1
SF1	-10.2099	-6.20995	7.09572e-21	4.26054e-19	1	1
POLR2A	-10.201	-6.20096	4.24088e-23	3.0251e-21	1	1
FNTA	-10.1866	-6.18659	4.18067e-24	3.3283e-22	1	1
VPS72	-10.1821	-6.18213	1.25371e-19	6.5951e-18	1	1
TSEN54	-10.1708	-6.17077	4.71914e-17	1.80982e-15	1	1
YKT6	-10.1692	-6.1692	7.70731e-23	5.45414e-21	1	1
NAA30	-10.1687	-6.16871	5.84395e-15	1.72257e-13	1	1
RBM22	-10.1378	-6.13785	1.49418e-21	9.68936e-20	1	1
SLC20A2	-10.1304	-6.13041	3.51472e-18	1.54761e-16	1	1
MTHFD1	-10.1176	-6.1176	2.3169e-26	2.34758e-24	1	1
RPN2	-10.1141	-6.11405	1.43544e-27	1.6515e-25	1	1
DCTN2	-10.1119	-6.11191	2.13938e-19	1.07423e-17	1	1
GPI	-10.1102	-6.11021	3.2264e-17	1.25625e-15	1	1
WDR1	-10.1068	-6.10685	3.8391e-19	1.8604e-17	1	1
IPO7	-10.1051	-6.10507	2.4506e-24	2.00466e-22	1	1
HK2	-10.1002	-6.10017	1.55704e-21	1.00604e-19	1	1
XRCC5	-10.0966	-6.09656	2.96049e-19	1.45439e-17	1	1
SACM1L	-10.0947	-6.0947	4.49365e-30	7.93419e-28	1	1
SNRPB	-10.0797	-6.07973	3.48696e-16	1.2051e-14	1	1
CAPZB	-10.0749	-6.07494	9.11722e-16	2.96692e-14	1	1
RIOK2	-10.0605	-6.06053	1.78809e-17	7.19795e-16	1	1
SPATA5	-10.0504	-6.05043	3.01262e-15	9.24682e-14	0.511857	1
CENPA	-10.05	-6.04999	6.92493e-18	2.95436e-16	1	1
MAD2L2	-10.0459	-6.04591	6.91341e-14	1.81038e-12	1	1
EXOSC1	-10.0452	-6.04524	9.36387e-17	3.45514e-15	1	1
CCDC115	-10.0303	-6.03031	4.50807e-18	1.97525e-16	1	1
RPL11	-10.0218	-6.02178	1.26289e-23	9.58342e-22	1	1
PPP4C	-10.0216	-6.02164	7.86571e-18	3.31606e-16	1	1
ELP4	-10.0188	-6.01878	1.36399e-20	7.94905e-19	1	1
RPS19BP1	-10.0186	-6.01857	8.22037e-33	2.76592e-30	1	1
FASTKD5	-10.0014	-6.00142	8.18656e-17	3.06061e-15	1	1
NUP88	-9.99752	-5.99752	7.25551e-15	2.11417e-13	1	1
INTS4	-9.99496	-5.99496	2.65708e-17	1.04831e-15	1	1
RNMT	-9.99297	-5.99297	1.70075e-29	2.68402e-27	1	1
CWC22	-9.99295	-5.99295	1.14126e-22	8.01264e-21	1	1
NOM1	-9.98149	-5.98149	7.14235e-19	3.42391e-17	1	1
ISG20L2	-9.97685	-5.97685	8.66971e-18	3.61231e-16	1	1
RPL3	-9.942	-5.942	8.54766e-20	4.60515e-18	1	1
DONSON	-9.93791	-5.93791	8.77277e-21	5.21483e-19	1	1
NMD3	-9.93193	-5.93193	5.61068e-26	5.4675e-24	1	1
SKA3	-9.92594	-5.92594	1.27161e-19	6.66958e-18	1	1
CCNA2	-9.92426	-5.92426	3.1602e-18	1.39841e-16	1	1
LAS1L	-9.92269	-5.92269	1.51718e-23	1.12733e-21	1	1
UPF1	-9.91672	-5.91672	3.31175e-28	4.18854e-26	1	1
PHF5A	-9.91295	-5.91295	1.03379e-17	4.23807e-16	1	1
SRP54	-9.90359	-5.90359	2.30763e-14	6.40001e-13	1	1
SNW1	-9.89317	-5.89317	4.48599e-17	1.72411e-15	1	1
RPL13A	-9.89109	-5.89109	5.69757e-24	4.49579e-22	1	1
RRP12	-9.88182	-5.88182	1.34561e-18	6.24905e-17	1	1
TFRC	-9.88115	-5.88115	2.78228e-18	1.24041e-16	1	1
CHAF1B	-9.8802	-5.8802	3.09736e-17	1.2113e-15	1	1
CUL3	-9.87238	-5.87238	3.46325e-29	5.23392e-27	1	1
ANAPC5	-9.86585	-5.86585	8.22986e-19	3.92415e-17	1	1
TAF8	-9.86397	-5.86397	1.9925e-27	2.24887e-25	1	1
MRPL11	-9.85474	-5.85474	2.45347e-20	1.37587e-18	1	1
NOP16	-9.85368	-5.85368	1.34298e-18	6.24905e-17	1	1
FANCM	-9.84794	-5.84794	3.67002e-22	2.50757e-20	1	1
WDR82	-9.84501	-5.84501	6.66778e-22	4.43681e-20	1	1
NCBP2	-9.84164	-5.84164	9.66168e-15	2.78347e-13	1	1
RAE1	-9.83364	-5.83364	7.18197e-14	1.87795e-12	1	1
NCAPH	-9.82642	-5.82642	9.8906e-18	4.06403e-16	1	1
SS18L2	-9.81424	-5.81424	1.81306e-18	8.22706e-17	1	1
SUPT5H	-9.81376	-5.81376	8.72545e-32	2.28825e-29	1	1
MCM6	-9.81333	-5.81333	3.2018e-16	1.11085e-14	1	1
PRPF19	-9.81312	-5.81312	2.0937e-16	7.4674e-15	1	1
C7orf26	-9.81044	-5.81044	3.01701e-28	3.88111e-26	1	1
SEC61B	-9.80081	-5.80081	2.97542e-16	1.03837e-14	1	1
MARS2	-9.79323	-5.79323	1.50842e-26	1.56393e-24	1	1
IARS	-9.78404	-5.78404	2.90087e-17	1.13946e-15	1	1
OST4	-9.7749	-5.7749	5.3336e-15	1.57735e-13	1	1
CAMLG	-9.76446	-5.76446	4.23985e-23	3.0251e-21	1	1
BCAS2	-9.75896	-5.75896	8.85726e-12	1.91922e-10	1	1
ZNHIT6	-9.75713	-5.75713	3.20658e-15	9.8084e-14	1	1
VARS2	-9.74627	-5.74627	3.92347e-12	8.69159e-11	1	1
PSMC1	-9.73941	-5.73941	9.45529e-17	3.47662e-15	1	1
LUC7L3	-9.73918	-5.73918	1.96722e-15	6.1856e-14	1	1
NOC4L	-9.73523	-5.73523	3.52139e-25	3.10382e-23	1	1
SPDL1	-9.70405	-5.70405	1.59553e-29	2.56334e-27	1	1
RANGAP1	-9.69741	-5.69741	1.30074e-14	3.69549e-13	1	1
SIN3A	-9.69666	-5.69666	2.14677e-16	7.64138e-15	1	1
ABT1	-9.695	-5.695	4.10872e-11	8.36425e-10	1	1
SSU72	-9.69447	-5.69447	2.0868e-15	6.51732e-14	1	1
ARCN1	-9.68346	-5.68346	1.04481e-19	5.5618e-18	1	1
DPAGT1	-9.68257	-5.68257	6.80898e-13	1.60614e-11	1	1
AATF	-9.66311	-5.66311	4.10267e-31	8.92231e-29	1	1
TIMM50	-9.65871	-5.65871	7.66013e-28	9.04656e-26	1	1
PI4KA	-9.65716	-5.65716	2.42488e-29	3.72783e-27	1	1
NOP14	-9.65295	-5.65295	1.03872e-18	4.9004e-17	1	1
RAD51C	-9.63809	-5.63809	5.748e-18	2.46998e-16	1	1
DCTN3	-9.63699	-5.63699	9.88064e-26	9.22521e-24	1	1
RNASEH1	-9.63584	-5.63584	6.85384e-30	1.14228e-27	1	1
MRPS10	-9.6356	-5.6356	4.82876e-11	9.77427e-10	1	1
SNRNP25	-9.61297	-5.61297	4.44185e-21	2.71272e-19	1	1
LETM1	-9.61176	-5.61176	2.33264e-27	2.59987e-25	1	1
MRPS15	-9.60816	-5.60816	1.74107e-15	5.51484e-14	1	1
SFPQ	-9.60506	-5.60506	3.94202e-17	1.5249e-15	1	1
ORC1	-9.59631	-5.59631	9.69719e-20	5.19309e-18	1	1
MTBP	-9.59578	-5.59578	1.064e-15	3.42497e-14	1	1
PMPCB	-9.59101	-5.59101	2.56924e-11	5.3966e-10	1	1
SLC39A7	-9.58999	-5.58999	1.53417e-17	6.18979e-16	1	1
MRPL10	-9.58096	-5.58096	2.45359e-15	7.58317e-14	1	1
CDIPT	-9.58051	-5.58051	1.62731e-16	5.85076e-15	1	1
BTAF1	-9.57851	-5.57851	4.75633e-15	1.42076e-13	1	1
CDC40	-9.57541	-5.57541	3.94075e-13	9.50952e-12	1	1
SUPT6H	-9.55528	-5.55528	9.73517e-16	3.14506e-14	1	1
NRDE2	-9.54856	-5.54856	8.59064e-18	3.59617e-16	1	1
USP8	-9.54779	-5.54779	4.72256e-15	1.41304e-13	1	1
EMG1	-9.54577	-5.54577	2.5747e-14	7.06379e-13	1	1
CCT7	-9.54114	-5.54114	2.27056e-17	8.99799e-16	1	1
XRN1	-9.53677	-5.53677	1.45705e-26	1.51951e-24	1	1
RAD17	-9.53105	-5.53105	6.25516e-24	4.8711e-22	1	1
PPWD1	-9.52864	-5.52864	3.95816e-18	1.73857e-16	1	1
MED9	-9.51009	-5.51009	1.41099e-15	4.49324e-14	1	1
WBP4	-9.50328	-5.50328	8.40785e-18	3.52793e-16	1	1
INTS8	-9.49051	-5.49051	9.5123e-26	8.97528e-24	1	1
MTG2	-9.48091	-5.48091	1.90863e-17	7.66592e-16	1	1
GTF2H4	-9.47979	-5.47979	7.5833e-25	6.40914e-23	1	1
PDCD11	-9.47011	-5.47011	3.52281e-15	1.07205e-13	1	1
SON	-9.46928	-5.46928	2.22152e-28	2.95645e-26	1	1
SRSF7	-9.46403	-5.46403	9.88438e-16	3.18749e-14	1	1
BRF2	-9.45467	-5.45467	8.86622e-17	3.28714e-15	1	1
SKIV2L2	-9.45123	-5.45123	6.82507e-30	1.14228e-27	1	1
ZC3H18	-9.44672	-5.44672	1.33533e-23	1.00477e-21	1	1
RBM42	-9.44222	-5.44222	1.98754e-27	2.24887e-25	1	1
GINS4	-9.43557	-5.43557	2.05516e-13	5.13302e-12	1	1
IGF1R	-9.41956	-5.41956	4.05687e-27	4.38462e-25	1	1
CSNK1A1	-9.41608	-5.41608	1.4362e-14	4.05892e-13	1	1
ROMO1	-9.41172	-5.41172	9.82619e-15	2.8263e-13	1	1
TRAPPC4	-9.40636	-5.40636	1.63281e-16	5.85874e-15	1	1
HTATSF1	-9.4018	-5.4018	2.46131e-16	8.67442e-15	1	1
SARS2	-9.39945	-5.39945	3.56817e-11	7.36471e-10	1	1
SNRNP27	-9.39742	-5.39742	1.23904e-13	3.17012e-12	1	1
TRNAU1AP	-9.38405	-5.38405	7.36148e-28	8.75182e-26	1	1
C18orf21	-9.3802	-5.3802	1.03428e-11	2.22488e-10	1	1
TUBGCP6	-9.37917	-5.37917	2.85309e-16	9.9763e-15	1	1
POLR2G	-9.37456	-5.37456	1.10089e-16	4.03124e-15	1	1
GPN1	-9.37278	-5.37278	3.49368e-21	2.1558e-19	1	1
NUFIP1	-9.37088	-5.37088	2.09602e-12	4.72545e-11	1	1
RNPS1	-9.36578	-5.36578	3.11595e-18	1.38226e-16	1	1
CTNNBL1	-9.36503	-5.36503	2.30629e-26	2.34758e-24	1	1
C16orf59	-9.36055	-5.36055	1.19142e-29	1.94922e-27	1	1
DDX18	-9.36014	-5.36014	4.33815e-17	1.67089e-15	1	1
TTI2	-9.35379	-5.35379	1.69471e-14	4.75186e-13	1	1
SRBD1	-9.34309	-5.34309	8.43506e-17	3.14034e-15	1	1
RPS14	-9.34255	-5.34255	2.36069e-27	2.61479e-25	1	1
GET4	-9.33523	-5.33523	3.78198e-22	2.5742e-20	1	1
ATP6V1B2	-9.33125	-5.33125	8.66821e-13	2.02861e-11	1	1
NDC1	-9.32803	-5.32803	1.19286e-25	1.08532e-23	1	1
PPP1R15B	-9.32297	-5.32297	2.01561e-11	4.2588e-10	1	1
RIOK1	-9.30987	-5.30987	5.06505e-15	1.50291e-13	1	1
NARS2	-9.30557	-5.30557	2.99877e-21	1.88299e-19	1	1
CENPE	-9.30535	-5.30535	8.3103e-24	6.41548e-22	1	1
CUL1	-9.30372	-5.30372	7.8137e-14	2.03419e-12	1	1
CDCA5	-9.29303	-5.29303	5.37946e-26	5.27099e-24	1	1
TGS1	-9.29211	-5.29211	8.69657e-13	2.03258e-11	1	1
SLC35B1	-9.29149	-5.29149	3.89714e-16	1.32883e-14	1	1
ATP6V1A	-9.2899	-5.2899	6.13975e-28	7.34834e-26	1	1
PSMD6	-9.28889	-5.28889	1.68069e-16	6.01844e-15	1	1
DCTN6	-9.28702	-5.28702	2.7057e-14	7.41179e-13	1	1
RPL15	-9.28028	-5.28028	2.15583e-13	5.36191e-12	1	1
KIF20A	-9.27946	-5.27946	2.57708e-16	9.0645e-15	1	1
CKAP5	-9.27544	-5.27544	4.33763e-30	7.7353e-28	1	1
VPS16	-9.26771	-5.26771	6.09681e-28	7.34625e-26	1	1
SLC25A26	-9.26029	-5.26029	5.9768e-16	1.98481e-14	1	1
WDR43	-9.25953	-5.25953	2.09258e-11	4.41621e-10	1	1
DDX3X	-9.25696	-5.25696	5.26195e-12	1.15137e-10	1	1
GINS1	-9.24569	-5.24569	5.75767e-17	2.17075e-15	1	1
PPCS	-9.24528	-5.24528	5.19916e-16	1.73627e-14	1	1
MRPS22	-9.23834	-5.23834	8.60757e-25	7.24051e-23	1	1
POLR2C	-9.23496	-5.23496	1.3075e-21	8.54091e-20	1	1
MRPS11	-9.23416	-5.23416	1.69927e-11	3.60751e-10	1	1
KPNB1	-9.23307	-5.23307	7.26235e-24	5.63085e-22	1	1
MTPAP	-9.2271	-5.2271	2.84909e-19	1.40353e-17	1	1
RPL4	-9.21303	-5.21303	2.29334e-16	8.13066e-15	1	1
KCTD10	-9.21194	-5.21194	2.49673e-14	6.871e-13	1	1
ELAVL1	-9.21133	-5.21133	1.20582e-24	9.95525e-23	1	1
TUBG2	-9.20345	-5.20345	8.29208e-13	1.94314e-11	1	1
GEMIN6	-9.19237	-5.19237	9.1682e-16	2.97808e-14	1	1
PRPF8	-9.17867	-5.17867	2.27281e-16	8.0739e-15	1	1
IMP4	-9.1635	-5.1635	4.91059e-28	5.99798e-26	1	1
GTF2H3	-9.16306	-5.16306	5.47098e-18	2.36806e-16	1	1
NELFB	-9.15654	-5.15654	4.48764e-16	1.50996e-14	1	1
HSF1	-9.15001	-5.15001	3.62105e-28	4.54747e-26	1	1
CDC20	-9.14757	-5.14757	9.32895e-16	3.02478e-14	1	1
CHMP4B	-9.14711	-5.14711	2.47627e-10	4.65324e-09	0.206547	0.989702
SCAP	-9.14638	-5.14638	1.67996e-14	4.7179e-13	1	1
RBMX	-9.14312	-5.14312	1.4741e-14	4.15943e-13	1	1
NR2C2AP	-9.14273	-5.14273	1.2697e-14	3.62281e-13	1	1
HARS2	-9.14257	-5.14257	1.88172e-14	5.24324e-13	1	1
DLST	-9.14219	-5.14219	8.64057e-18	3.6086e-16	1	1
UMPS	-9.13273	-5.13273	1.62318e-12	3.71104e-11	1	1
DDI2	-9.12122	-5.12122	5.03479e-18	2.18989e-16	1	1
LONP1	-9.11934	-5.11934	8.40131e-17	3.13432e-15	1	1
UBE3D	-9.11213	-5.11213	1.25723e-13	3.21205e-12	1	1
NRBP1	-9.1083	-5.1083	9.60719e-26	9.0171e-24	1	1
DIDO1	-9.10519	-5.10519	9.03219e-24	6.94272e-22	1	1
RRS1	-9.10461	-5.10461	3.81027e-16	1.30419e-14	1	1
RPS9	-9.10118	-5.10118	2.35913e-19	1.17515e-17	1	1
MRPL44	-9.09938	-5.09938	2.89511e-14	7.91847e-13	1	1
COX15	-9.09229	-5.09229	1.97018e-15	6.1856e-14	1	1
UBA1	-9.09164	-5.09164	4.34368e-16	1.46429e-14	1	1
MASTL	-9.08581	-5.08581	1.05455e-24	8.78778e-23	1	1
CD2BP2	-9.08222	-5.08222	1.13219e-25	1.04326e-23	1	1
INTS10	-9.07679	-5.07679	1.65153e-12	3.77102e-11	1	1
RPL23A	-9.07401	-5.07401	9.35847e-17	3.45514e-15	1	1
TUBE1	-9.06541	-5.06541	4.20813e-16	1.42128e-14	1	1
BIRC5	-9.06014	-5.06014	3.72171e-16	1.27879e-14	1	1
TRAPPC11	-9.05627	-5.05627	1.29353e-25	1.17094e-23	1	1
POLG	-9.04224	-5.04224	6.62643e-16	2.18427e-14	1	1
BYSL	-9.03791	-5.03791	1.4642e-16	5.31794e-15	1	1
MED6	-9.02413	-5.02413	1.06717e-17	4.36485e-16	1	1
SF3B1	-9.01735	-5.01735	3.06222e-16	1.06657e-14	1	1
MED21	-9.01702	-5.01702	1.61085e-15	5.11144e-14	1	1
TMA16	-9.00947	-5.00947	4.97959e-17	1.89824e-15	1	1
EIF2B4	-9.00666	-5.00666	2.73362e-13	6.74256e-12	1	1
EEF2	-9.00479	-5.00479	8.27347e-16	2.71215e-14	1	1
PFAS	-9.0007	-5.0007	3.88149e-10	7.18035e-09	1	1
MCAT	-8.99865	-4.99865	8.49764e-17	3.15705e-15	1	1
BUB1	-8.98807	-4.98807	3.84763e-14	1.03805e-12	1	1
TRNT1	-8.98702	-4.98702	1.18208e-16	4.31084e-15	1	1
UFD1L	-8.98359	-4.98359	1.99297e-17	7.98667e-16	1	1
COG5	-8.96091	-4.96091	7.29649e-18	3.09805e-16	1	1
TOMM20	-8.95958	-4.95958	2.84242e-15	8.73947e-14	1	1
CCT3	-8.95918	-4.95918	4.27261e-10	7.88752e-09	1	1
MRPS5	-8.93987	-4.93987	1.37598e-13	3.49543e-12	1	1
SMG7	-8.93981	-4.93981	2.23981e-17	8.8959e-16	1	1
IK	-8.93319	-4.93319	2.33216e-16	8.25187e-15	1	1
COA3	-8.92783	-4.92783	4.72084e-10	8.66118e-09	1	1
SF3A1	-8.91965	-4.91965	1.87361e-16	6.6958e-15	1	1
RPL10	-8.91379	-4.91379	4.89083e-15	1.45606e-13	1	1
NCAPH2	-8.90481	-4.90481	1.57853e-23	1.16805e-21	1	1
TMX2	-8.89692	-4.89692	3.08821e-16	1.07353e-14	1	1
DHX15	-8.89568	-4.89568	5.12028e-17	1.94691e-15	1	1
KIAA0391	-8.8904	-4.8904	1.78913e-22	1.24146e-20	1	1
ARF4	-8.88601	-4.88601	4.16984e-19	2.00975e-17	1	1
SAE1	-8.88122	-4.88122	5.13766e-14	1.36339e-12	1	1
XRCC6	-8.88027	-4.88027	2.05254e-10	3.88979e-09	1	1
MED14	-8.87721	-4.87721	1.41588e-16	5.15294e-15	1	1
GTF2F2	-8.8682	-4.8682	7.35826e-11	1.46287e-09	1	1
MED31	-8.8586	-4.8586	9.38024e-15	2.71115e-13	1	1
RPL31	-8.85641	-4.85642	2.3419e-09	4.05467e-08	1	1
TOMM40	-8.85007	-4.85007	1.32834e-15	4.23761e-14	1	1
SSRP1	-8.84369	-4.8437	3.69211e-09	6.25868e-08	1	1
SCD	-8.8424	-4.8424	7.82778e-18	3.30789e-16	1	1
WDR83	-8.83586	-4.83586	2.09718e-30	3.97862e-28	1	1
MED30	-8.83396	-4.83396	1.20247e-12	2.78128e-11	1	1
MYH9	-8.83352	-4.83352	4.73592e-16	1.58453e-14	1	1
RPLP1	-8.83181	-4.83181	6.82589e-12	1.48809e-10	1	1
LSM7	-8.83091	-4.83091	1.00527e-14	2.88679e-13	1	1
CTC1	-8.82802	-4.82802	1.95509e-09	3.41815e-08	1	1
RPP38	-8.82474	-4.82481	1.57723e-08	2.51582e-07	1	1
RUVBL2	-8.81597	-4.81599	2.77538e-09	4.75441e-08	1	1
GTF2F1	-8.80549	-4.80549	1.7045e-13	4.30543e-12	1	1
CIT	-8.80529	-4.80529	1.80899e-15	5.70968e-14	1	1
WDR61	-8.79695	-4.79695	6.68467e-20	3.62334e-18	1	1
ELP5	-8.79628	-4.79628	1.76215e-13	4.44475e-12	1	1
GTF3C4	-8.79604	-4.79604	5.46742e-21	3.31635e-19	1	1
TNPO1	-8.79355	-4.79355	4.12262e-20	2.28319e-18	1	1
FXN	-8.79185	-4.79185	2.7202e-12	6.07887e-11	1	1
ANAPC15	-8.79105	-4.79105	1.11623e-17	4.5551e-16	1	1
SNF8	-8.78932	-4.78932	4.70714e-18	2.05238e-16	1	1
DARS2	-8.78321	-4.78321	6.8687e-17	2.58417e-15	1	1
WRB	-8.77856	-4.77856	5.48682e-15	1.61998e-13	1	1
SCAF8	-8.77822	-4.77822	2.67056e-23	1.94384e-21	1	1
NUBP2	-8.7746	-4.7746	1.17713e-15	3.77551e-14	1	1
SRP14	-8.76975	-4.76975	8.48201e-16	2.77541e-14	1	1
SEC13	-8.76366	-4.76366	2.76176e-27	3.0215e-25	1	1
CCDC51	-8.76323	-4.76323	2.9865e-26	2.99204e-24	1	1
WDHD1	-8.75754	-4.75754	2.12376e-18	9.53979e-17	1	1
NAPG	-8.75484	-4.75484	1.43517e-19	7.39692e-18	1	1
CHMP6	-8.75387	-4.75387	3.0962e-15	9.48703e-14	1	1
HAUS7	-8.75373	-4.75373	6.04425e-18	2.59103e-16	1	1
UBE2I	-8.75008	-4.75008	3.60756e-12	8.01443e-11	1	1
POLE2	-8.74549	-4.74549	4.59739e-16	1.54108e-14	1	1
PLRG1	-8.74048	-4.7405	4.73419e-09	7.93467e-08	1	1
CTU2	-8.73673	-4.73673	1.71931e-20	9.79565e-19	1	1
TBCD	-8.73438	-4.73438	1.48692e-17	6.01275e-16	1	1
ACTR1A	-8.73337	-4.73338	1.64981e-09	2.90148e-08	1	1
SUGP1	-8.72366	-4.72366	5.67721e-13	1.34989e-11	1	1
PITRM1	-8.71589	-4.71589	2.80454e-13	6.90793e-12	1	1
ATP5L	-8.70783	-4.70783	8.6691e-19	4.12256e-17	1	1
XAB2	-8.70515	-4.70515	5.27633e-16	1.75874e-14	1	1
MRPL39	-8.70223	-4.70223	2.78423e-11	5.80037e-10	1	1
WDR36	-8.69302	-4.69302	4.56538e-26	4.49804e-24	1	1
FARSB	-8.69182	-4.69182	1.66096e-10	3.19179e-09	1	1
DPY30	-8.68342	-4.68342	1.25864e-15	4.02969e-14	1	1
SEC16A	-8.6712	-4.6712	1.26733e-26	1.32943e-24	1	1
SMG6	-8.64477	-4.64477	2.54533e-12	5.71673e-11	1	1
RPL17	-8.64337	-4.64337	1.43711e-10	2.77961e-09	1	1
SDAD1	-8.63283	-4.63283	6.3972e-16	2.11654e-14	0.113914	0.789748
RNF168	-8.63014	-4.63014	1.25002e-26	1.31903e-24	1	1
NCL	-8.62841	-4.62841	7.134e-16	2.34292e-14	1	1
ACTL6A	-8.62814	-4.62814	1.61527e-16	5.81922e-15	1	1
PAF1	-8.62242	-4.62242	3.11249e-11	6.45432e-10	1	1
SEC63	-8.6171	-4.6171	2.21371e-12	4.98447e-11	1	1
ABCE1	-8.61499	-4.61499	2.92512e-13	7.1752e-12	1	1
DNAJC8	-8.60327	-4.60327	5.58496e-18	2.41154e-16	1	1
CCNK	-8.59451	-4.59451	1.81939e-13	4.57619e-12	1	1
ALG2	-8.59412	-4.59412	6.1699e-11	1.23905e-09	1	1
SRSF11	-8.58597	-4.58597	1.0429e-14	2.99004e-13	1	1
MAT2A	-8.58063	-4.58063	4.45278e-14	1.18946e-12	1	1
GTF2H1	-8.57821	-4.57821	7.62376e-14	1.99055e-12	1	1
DCTN4	-8.57444	-4.57444	4.31534e-21	2.65363e-19	1	1
TAF11	-8.57273	-4.57277	9.6293e-09	1.56535e-07	1	1
CARS2	-8.56604	-4.56604	8.61111e-14	2.232e-12	1	1
BOD1L1	-8.56557	-4.56557	2.77142e-11	5.78721e-10	1	1
TEFM	-8.55781	-4.55781	8.84935e-11	1.74184e-09	1	1
PAFAH1B1	-8.55765	-4.55765	3.86435e-16	1.32017e-14	1	1
TUBGCP4	-8.55389	-4.55389	6.15482e-15	1.8112e-13	1	1
UROD	-8.54858	-4.54858	1.84489e-14	5.15674e-13	1	1
POLR1A	-8.53122	-4.53122	2.19968e-17	8.79527e-16	1	1
BUB1B	-8.52181	-4.52181	1.67994e-12	3.8261e-11	1	1
VPS37A	-8.51392	-4.51392	9.95551e-25	8.33505e-23	1	1
RBMX2	-8.50115	-4.50118	5.61929e-09	9.36532e-08	1	1
GATC	-8.50017	-4.50017	3.26338e-16	1.13002e-14	1	1
TBL3	-8.49831	-4.49831	2.83101e-16	9.91853e-15	1	1
MZT1	-8.49399	-4.49399	3.81971e-14	1.03207e-12	1	1
TKT	-8.4921	-4.4921	1.27598e-11	2.72184e-10	1	1
PNO1	-8.49093	-4.49093	3.80082e-16	1.30346e-14	1	1
HNRNPU	-8.49043	-4.49043	3.12764e-14	8.52833e-13	1	1
PSMD11	-8.48005	-4.48006	9.96563e-10	1.78252e-08	1	1
TPT1	-8.47896	-4.47896	1.12784e-10	2.20776e-09	1	1
MMS19	-8.47515	-4.47516	9.91241e-10	1.77656e-08	1	1
SNIP1	-8.46722	-4.4673	1.80091e-08	2.86236e-07	1	1
ATXN7L3	-8.46339	-4.46339	7.0414e-15	2.05514e-13	1	1
RPS12	-8.45414	-4.45415	2.23235e-09	3.87251e-08	1	1
RCC1	-8.45102	-4.45109	1.56325e-08	2.49574e-07	1	1
NOL12	-8.44991	-4.44991	3.9216e-16	1.33208e-14	1	1
DNAAF2	-8.44244	-4.44244	8.43607e-15	2.44619e-13	1	1
C14orf80	-8.43514	-4.43514	8.4782e-21	5.05658e-19	1	1
PISD	-8.42154	-4.42154	4.56671e-15	1.36871e-13	1	1
RRP36	-8.41847	-4.41847	3.29837e-21	2.04947e-19	1	1
AARS2	-8.40906	-4.40906	2.41055e-12	5.42085e-11	1	1
PSMD12	-8.40882	-4.40882	5.58279e-17	2.11376e-15	1	1
PSMD4	-8.40478	-4.40478	6.56503e-22	4.3848e-20	1	1
ESCO2	-8.40153	-4.40153	5.36441e-16	1.78477e-14	1	1
INCENP	-8.39756	-4.39756	5.97731e-24	4.69575e-22	1	1
TCP1	-8.39182	-4.39182	5.39316e-11	1.0892e-09	1	1
WDR92	-8.38937	-4.38937	8.56852e-16	2.79858e-14	1	1
MRPL19	-8.36693	-4.36693	3.58029e-15	1.08584e-13	1	1
BANP	-8.3653	-4.3653	3.79778e-15	1.14789e-13	1	1
CHERP	-8.36269	-4.36269	6.24278e-16	2.06928e-14	1	1
CDC123	-8.3622	-4.3622	4.60895e-12	1.01221e-10	1	1
UBL5	-8.362	-4.362	1.91633e-10	3.65887e-09	1	1
POLG2	-8.35631	-4.35631	1.9708e-10	3.75485e-09	1	1
EIF1AX	-8.35413	-4.35413	6.46383e-15	1.899e-13	1	1
EXOSC2	-8.34811	-4.34811	2.38219e-27	2.62232e-25	1	1
ZER1	-8.34768	-4.34768	2.40811e-15	7.45553e-14	1	1
UBTF	-8.34398	-4.34398	1.90509e-21	1.21769e-19	1	1
MRPS2	-8.33647	-4.33647	4.16741e-14	1.12093e-12	1	1
AASDHPPT	-8.33612	-4.33612	1.30139e-14	3.69549e-13	1	1
TBCC	-8.33573	-4.33573	4.81247e-10	8.82022e-09	1	1
DOLK	-8.32476	-4.32476	2.58644e-17	1.02271e-15	1	1
WNK1	-8.31308	-4.31325	3.84387e-08	5.88393e-07	1	1
NSL1	-8.30711	-4.30711	3.22741e-14	8.77353e-13	1	1
WDR75	-8.27729	-4.27729	1.5502e-20	8.91768e-19	1	1
MRPL37	-8.27412	-4.27412	2.00554e-10	3.81695e-09	1	1
CNOT3	-8.27381	-4.27381	3.5542e-15	1.07976e-13	1	1
EXOSC5	-8.26244	-4.26244	2.04892e-10	3.88706e-09	1	1
KDM8	-8.25976	-4.25976	1.20399e-19	6.35227e-18	1	1
GLRX5	-8.25896	-4.25896	3.9118e-16	1.33128e-14	1	1
MAD2L1BP	-8.25211	-4.25211	2.48374e-14	6.84582e-13	1	1
RPS26	-8.24786	-4.24786	1.00902e-19	5.3874e-18	1	1
COA6	-8.2419	-4.24194	1.0486e-08	1.69381e-07	1	1
NFIC	-8.23798	-4.23798	2.34123e-16	8.26756e-15	1	1
LENG1	-8.23795	-4.23796	2.88446e-09	4.93652e-08	1	1
ASH2L	-8.23783	-4.23783	8.12071e-17	3.04237e-15	1	1
VBP1	-8.22718	-4.2273	2.94568e-08	4.57581e-07	1	1
PFDN5	-8.22645	-4.22654	2.13953e-08	3.3735e-07	1	1
ING3	-8.22543	-4.22543	5.65116e-14	1.49078e-12	1	1
RAD51D	-8.22329	-4.22329	6.54141e-16	2.16024e-14	1	1
NAPA	-8.21917	-4.21917	1.24027e-20	7.25171e-19	1	1
ORAOV1	-8.2183	-4.2183	9.63237e-16	3.1175e-14	1	1
OXSR1	-8.21753	-4.21753	9.12324e-18	3.77482e-16	1	1
MRPS30	-8.21237	-4.21244	1.48799e-08	2.38412e-07	1	1
POLR2J	-8.2095	-4.20954	9.96457e-09	1.61544e-07	1	1
RFT1	-8.2049	-4.2049	4.32203e-12	9.52717e-11	1	1
RRP9	-8.2014	-4.2014	2.21668e-17	8.82368e-16	1	1
MRPL43	-8.20113	-4.20134	4.73572e-08	7.19967e-07	1	1
ERAL1	-8.20081	-4.20081	3.79135e-13	9.17383e-12	1	1
DKC1	-8.19963	-4.19963	4.04665e-11	8.25675e-10	1	1
PSMB6	-8.19869	-4.19869	4.52713e-10	8.32292e-09	1	1
DNM1L	-8.19562	-4.19563	2.69027e-09	4.62192e-08	1	1
ATP5O	-8.17964	-4.17964	1.7249e-14	4.82889e-13	1	1
IMMT	-8.17917	-4.17918	4.06932e-09	6.859e-08	1	1
YEATS2	-8.17103	-4.17103	6.81593e-15	1.99587e-13	1	1
IRS2	-8.16147	-4.16147	2.70117e-13	6.67175e-12	1	1
GUK1	-8.15966	-4.15966	1.33616e-17	5.4401e-16	1	1
RBBP4	-8.15956	-4.15956	3.30457e-10	6.15782e-09	1	1
PSMB7	-8.15448	-4.15448	2.44554e-14	6.76145e-13	1	1
NOC3L	-8.15356	-4.15359	7.32853e-09	1.20674e-07	1	1
SMU1	-8.15333	-4.15333	8.71277e-16	2.84049e-14	1	1
C19orf53	-8.14371	-4.14371	1.98917e-15	6.23426e-14	1	1
UTP3	-8.13788	-4.13803	3.27299e-08	5.05782e-07	0.10617	0.772785
RPP40	-8.13334	-4.13334	3.10575e-13	7.59738e-12	1	1
MRPS9	-8.13235	-4.13235	9.82294e-14	2.53506e-12	1	1
PSMC6	-8.13118	-4.13118	1.22008e-23	9.33808e-22	1	1
NXF1	-8.12419	-4.12419	7.04363e-18	2.99783e-16	1	1
WDR46	-8.12283	-4.12284	3.65427e-10	6.79526e-09	1	1
PGS1	-8.111	-4.1118	1.83166e-07	2.6173e-06	1	1
SMARCB1	-8.10037	-4.10155	2.70708e-07	3.8072e-06	1	1
ADSL	-8.09978	-4.09978	3.69768e-10	6.86169e-09	1	1
BRAT1	-8.09585	-4.09585	1.37058e-14	3.87962e-13	1	1
ZPR1	-8.09351	-4.09351	1.18771e-12	2.75072e-11	1	1
RAD9A	-8.07861	-4.07861	1.18202e-18	5.53255e-17	1	1
SRCAP	-8.07782	-4.07782	1.27255e-14	3.62515e-13	1	1
PPP1R35	-8.0724	-4.07319	1.81389e-07	2.59399e-06	1	1
REXO2	-8.06685	-4.06685	2.31414e-25	2.07377e-23	1	1
COG8	-8.06552	-4.06552	3.60881e-12	8.01443e-11	1	1
ZNF511	-8.04723	-4.04723	1.92546e-18	8.67091e-17	1	1
UTP20	-8.03621	-4.03621	3.27539e-14	8.89041e-13	1	1
EXOSC6	-8.03338	-4.03338	4.37632e-10	8.06228e-09	1	1
NDOR1	-8.02795	-4.02836	9.58552e-08	1.4174e-06	1	1
GTF2A2	-8.02588	-4.02588	1.13939e-13	2.92355e-12	1	1
MRPS18A	-8.02208	-4.02208	9.26205e-12	2.00206e-10	1	1
COASY	-8.01889	-4.01899	2.25596e-08	3.54454e-07	1	1
LARS2	-8.01817	-4.01817	7.36752e-12	1.60226e-10	1	1
BCS1L	-8.0159	-4.0159	9.00336e-14	2.32691e-12	1	1
PSMA7	-8.01508	-4.01508	5.08579e-11	1.02829e-09	1	1
MED26	-8.01205	-4.01205	6.87025e-11	1.36891e-09	1	1
WDR3	-8.01065	-4.01068	5.0915e-09	8.52551e-08	1	1
MOB4	-8.01011	-4.01012	2.64358e-09	4.55488e-08	1	1
SLBP	-8.00581	-4.00589	1.84297e-08	2.9214e-07	1	1
TARDBP	-8.00256	-4.00256	9.18057e-13	2.14289e-11	0.455064	1
RFC4	-7.99984	-3.99984	3.85115e-15	1.16085e-13	1	1
CENPU	-7.99293	-3.99293	7.68914e-15	2.23688e-13	1	1
RBM25	-7.98759	-3.98759	1.08192e-12	2.51551e-11	1	1
PMF1	-7.98265	-3.98265	1.02499e-18	4.84844e-17	1	1
DDX56	-7.97828	-3.97828	2.04255e-14	5.67365e-13	1	1
N6AMT1	-7.97588	-3.97588	4.40596e-23	3.13034e-21	1	1
YEATS4	-7.96645	-3.96645	1.29918e-11	2.76802e-10	1	1
POLR3H	-7.95918	-3.9592	3.05713e-09	5.21702e-08	1	1
COA7	-7.95479	-3.95479	3.4595e-15	1.05459e-13	1	1
RPS27A	-7.9446	-3.9446	3.41429e-13	8.30655e-12	1	1
TTC27	-7.9445	-3.9445	3.2177e-15	9.82556e-14	1	1
ATPAF2	-7.94244	-3.94244	2.6966e-17	1.06155e-15	1	1
MCUR1	-7.93747	-3.93747	4.34467e-14	1.16334e-12	1	1
CYB5B	-7.93483	-3.93491	1.81219e-08	2.87772e-07	1	1
CDC7	-7.93263	-3.93264	2.39296e-09	4.13906e-08	1	1
RPS28	-7.92818	-3.92826	2.03035e-08	3.20987e-07	1	1
SUGT1	-7.9224	-3.9224	8.86042e-18	3.6746e-16	1	1
FH	-7.92151	-3.92151	1.56016e-13	3.95203e-12	1	1
TUBA1B	-7.92081	-3.92081	1.92105e-09	3.36193e-08	1	1
OXA1L	-7.919	-3.919	8.87147e-14	2.29615e-12	1	1
C9orf114	-7.91289	-3.9129	8.75184e-10	1.57967e-08	1	1
GGPS1	-7.91058	-3.91058	2.06541e-13	5.1514e-12	1	1
ISCU	-7.91055	-3.91055	1.73487e-21	1.11288e-19	1	1
ATP1A1	-7.91022	-3.91022	2.37619e-15	7.3695e-14	1	1
ERH	-7.90744	-3.90744	2.01213e-13	5.03258e-12	1	1
TBCB	-7.90736	-3.90736	1.3657e-14	3.87195e-13	1	1
DYNC1LI2	-7.90456	-3.90456	2.06298e-23	1.50775e-21	1	1
MCM7	-7.90421	-3.90421	6.63754e-11	1.32699e-09	1	1
TIMM9	-7.89901	-3.89901	7.93022e-15	2.30325e-13	1	1
ARMC7	-7.89432	-3.89432	1.04244e-09	1.85713e-08	1	1
SYF2	-7.8904	-3.89102	1.43131e-07	2.07349e-06	1	1
GCN1	-7.88978	-3.88978	6.09995e-21	3.68747e-19	1	1
YARS	-7.88744	-3.88744	7.39586e-17	2.77664e-15	1	1
METTL3	-7.88155	-3.88184	6.73452e-08	1.01433e-06	1	1
POLA2	-7.8812	-3.8812	3.66366e-16	1.26128e-14	1	1
RNGTT	-7.87975	-3.88178	4.69345e-07	6.41367e-06	1	1
NUP43	-7.87041	-3.87041	6.80753e-15	1.99587e-13	1	1
ISY1-RAB43	-7.86299	-3.86306	1.60932e-08	2.56471e-07	1	1
ELAC2	-7.86175	-3.86178	7.52315e-09	1.2365e-07	1	1
PKMYT1	-7.85768	-3.85923	3.57231e-07	4.98474e-06	1	1
RPL12	-7.85745	-3.85745	9.21587e-18	3.80432e-16	1	1
SNRNP200	-7.85475	-3.85475	1.67726e-19	8.49732e-18	1	1
PRKAR1A	-7.85235	-3.85235	3.66293e-19	1.77987e-17	1	1
DBR1	-7.85066	-3.85067	1.72059e-09	3.02001e-08	1	1
BRCA1	-7.85065	-3.851	8.15755e-08	1.21633e-06	1	1
SF3B3	-7.84176	-3.84176	1.4821e-10	2.86351e-09	1	1
SASS6	-7.8374	-3.83742	3.23174e-09	5.50446e-08	1	1
EARS2	-7.83457	-3.83461	8.11537e-09	1.32772e-07	1	1
CDC23	-7.83157	-3.83157	6.68826e-14	1.754e-12	1	1
MRPL51	-7.82785	-3.82785	1.72847e-18	7.88332e-17	1	1
TADA1	-7.82586	-3.82586	1.59456e-20	9.11401e-19	1	1
RRN3	-7.82315	-3.82315	4.66077e-11	9.45569e-10	1	1
PSMB1	-7.81856	-3.81856	3.1136e-14	8.50305e-13	1	1
FAM58A	-7.81719	-3.81719	2.76128e-16	9.69329e-15	1	1
NOL10	-7.81198	-3.81198	3.25597e-23	2.35075e-21	1	1
NOP2	-7.80418	-3.80418	4.06677e-13	9.80037e-12	1	1
ARIH1	-7.79515	-3.79524	2.10315e-08	3.31907e-07	1	1
MRPL21	-7.78131	-3.78131	6.11456e-13	1.44617e-11	0.567203	1
CDK9	-7.77682	-3.7769	1.85746e-08	2.94175e-07	1	1
NPLOC4	-7.77589	-3.77589	1.41955e-13	3.60098e-12	1	1
RPSA	-7.77342	-3.77343	9.20354e-10	1.65952e-08	1	1
RRP1	-7.77216	-3.77218	4.007e-09	6.77498e-08	1	1
EMC4	-7.76916	-3.76916	5.3936e-14	1.42495e-12	1	1
DNAJA1	-7.7663	-3.76712	1.8727e-07	2.66953e-06	1	1
EIF2S3	-7.75625	-3.75627	4.26741e-09	7.18609e-08	1	1
TRAPPC3	-7.75445	-3.75445	1.92039e-15	6.05058e-14	1	1
CCDC130	-7.75354	-3.75354	1.0747e-11	2.30627e-10	1	1
PPP2R1A	-7.75141	-3.75141	3.20265e-14	8.71952e-13	1	1
MRGBP	-7.74793	-3.74793	9.3775e-17	3.45514e-15	1	1
TAZ	-7.74302	-3.74302	9.49556e-15	2.74004e-13	1	1
INSIG1	-7.73812	-3.73812	2.08683e-21	1.32909e-19	1	1
RPS15A	-7.73748	-3.73771	5.21922e-08	7.92121e-07	1	1
CFDP1	-7.73745	-3.73774	6.69019e-08	1.00851e-06	1	1
MARS	-7.73498	-3.73498	1.53456e-12	3.51746e-11	1	1
MED27	-7.73159	-3.73159	5.48695e-17	2.08189e-15	1	1
TP53RK	-7.72957	-3.72986	6.75367e-08	1.01636e-06	1	1
URM1	-7.72833	-3.72846	3.04264e-08	4.71821e-07	1	1
STT3B	-7.72642	-3.72642	2.5573e-14	7.02686e-13	1	1
NUP93	-7.72253	-3.72263	2.21612e-08	3.48809e-07	1	1
COG4	-7.72161	-3.72161	4.74064e-17	1.81416e-15	1	1
RPL7L1	-7.71732	-3.71732	7.96048e-13	1.86788e-11	1	1
MVD	-7.71455	-3.71927	1.09172e-06	1.43152e-05	1	1
ZMAT2	-7.70715	-3.7072	1.19152e-08	1.91772e-07	1	1
OTUD5	-7.70581	-3.70581	7.62997e-13	1.79743e-11	1	1
CDAN1	-7.70161	-3.70163	3.27402e-09	5.57114e-08	1	1
NDC80	-7.70105	-3.70105	5.68908e-18	2.45057e-16	1	1
CDC6	-7.69889	-3.69889	7.83306e-14	2.03625e-12	1	1
ANLN	-7.69604	-3.69604	3.60924e-13	8.75695e-12	1	1
NAA25	-7.69588	-3.71388	4.23255e-06	5.1592e-05	1	1
QRICH1	-7.69101	-3.69101	5.07713e-15	1.50399e-13	1	1
MCMBP	-7.68952	-3.68952	1.07197e-13	2.76249e-12	1	1
CDK12	-7.68244	-3.68246	3.6597e-09	6.20964e-08	1	1
TRIM33	-7.67455	-3.67455	3.53319e-25	3.10382e-23	1	1
TSG101	-7.66968	-3.66968	8.75062e-26	8.34491e-24	1	1
GRPEL1	-7.6509	-3.6509	5.05571e-15	1.50264e-13	1	1
CWC15	-7.64952	-3.64963	2.47465e-08	3.87789e-07	1	1
NAA50	-7.6489	-3.64967	1.76031e-07	2.52547e-06	1	1
PGGT1B	-7.64004	-3.64004	1.06316e-19	5.64266e-18	1	1
ANAPC11	-7.63135	-3.63178	9.84435e-08	1.45206e-06	1	1
LAGE3	-7.62603	-3.62603	3.81548e-11	7.82986e-10	1	1
ATRIP	-7.62252	-3.62252	4.13172e-12	9.13023e-11	1	1
SMNDC1	-7.62046	-3.62046	3.49735e-13	8.49703e-12	1	1
TSR2	-7.61453	-3.61458	9.60149e-09	1.56226e-07	1	1
RNH1	-7.61343	-3.61343	2.34785e-13	5.81516e-12	1	1
USPL1	-7.60822	-3.61014	4.42638e-07	6.07665e-06	1	1
VCP	-7.60628	-3.60628	6.30398e-14	1.65565e-12	1	1
STX5	-7.60569	-3.60579	2.42831e-08	3.80863e-07	1	1
PHAX	-7.60124	-3.60603	1.10863e-06	1.4505e-05	1	1
RPUSD4	-7.59096	-3.59608	1.18578e-06	1.54463e-05	1	1
PSMB4	-7.58892	-3.58892	1.08971e-13	2.80416e-12	1	1
E4F1	-7.5881	-3.5881	6.09543e-13	1.44356e-11	1	1
EXOSC9	-7.58178	-3.58178	1.15206e-12	2.67161e-11	0.048437	0.589203
HAUS4	-7.58068	-3.58068	8.34125e-10	1.50862e-08	1	1
TERF2	-7.57897	-3.57901	1.00116e-08	1.62012e-07	1	1
NEDD8-MDP1	-7.57637	-3.57653	3.61757e-08	5.55182e-07	1	1
SLC33A1	-7.56516	-3.56516	4.19638e-14	1.12702e-12	1	1
FARSA	-7.56443	-3.56443	3.73138e-10	6.91702e-09	1	1
RPL17-C18orf32	-7.56434	-3.56759	7.52191e-07	1.00629e-05	1	1
DDX49	-7.56403	-3.56441	8.83455e-08	1.31289e-06	1	1
SEC61A1	-7.55898	-3.55898	3.94011e-16	1.33582e-14	1	1
ZMYND8	-7.5513	-3.5513	1.0226e-21	6.75408e-20	1	1
QRSL1	-7.54792	-3.54815	5.27383e-08	7.99729e-07	1	1
NAA20	-7.54321	-3.54321	2.42504e-11	5.10575e-10	1	1
CCT4	-7.54057	-3.54057	2.58533e-12	5.79198e-11	1	1
CENPK	-7.54029	-3.54029	1.50645e-14	4.23731e-13	1	1
SMARCD1	-7.53395	-3.53411	3.84851e-08	5.88597e-07	1	1
KRI1	-7.5329	-3.5329	7.80315e-13	1.8358e-11	1	1
QARS	-7.53076	-3.5308	8.59631e-09	1.40511e-07	1	1
TFDP1	-7.53034	-3.53034	2.59685e-11	5.4418e-10	1	1
CCDC174	-7.52937	-3.52937	2.73728e-12	6.10937e-11	1	1
DHX9	-7.52351	-3.52364	3.07655e-08	4.76665e-07	1	1
HINFP	-7.52233	-3.52235	5.96917e-09	9.90215e-08	1	1
IMP3	-7.51463	-3.51463	1.02393e-16	3.75715e-15	1	1
PABPN1	-7.51459	-3.52107	1.50337e-06	1.93711e-05	1	1
REV3L	-7.51294	-3.51294	1.18461e-10	2.31381e-09	1	1
VPRBP	-7.50786	-3.50786	3.72838e-15	1.12883e-13	1	1
DDX51	-7.50236	-3.504	3.77952e-07	5.24515e-06	1	1
TPI1	-7.5005	-3.5005	5.79963e-14	1.52769e-12	1	1
RPL34	-7.49913	-3.49945	7.20229e-08	1.07931e-06	1	1
NUP54	-7.49715	-3.49733	4.14057e-08	6.31101e-07	1	1
TACC3	-7.49107	-3.49146	9.16004e-08	1.35786e-06	1	1
TSEN15	-7.49074	-3.49952	2.0427e-06	2.60196e-05	1	1
NHP2	-7.48789	-3.48891	2.33176e-07	3.29234e-06	1	1
TELO2	-7.48619	-3.48619	8.66254e-12	1.87931e-10	1	1
NDUFB9	-7.48258	-3.48258	9.54863e-19	4.52874e-17	1	1
VHL	-7.48202	-3.48202	6.11738e-14	1.60902e-12	1	1
YRDC	-7.47887	-3.47918	7.04968e-08	1.05822e-06	1	1
DDX54	-7.47244	-3.47244	6.80219e-11	1.35686e-09	1	1
HUWE1	-7.47133	-3.47551	9.66275e-07	1.27453e-05	1	1
CDKN2AIP	-7.46859	-3.46859	1.34175e-19	6.97592e-18	1	1
NFE2L1	-7.46589	-3.46821	5.35442e-07	7.28896e-06	1	1
RFC2	-7.46422	-3.46499	1.77383e-07	2.54282e-06	1	1
NFIA	-7.46165	-3.46165	2.68205e-15	8.26061e-14	1	1
GPN3	-7.4573	-3.4573	4.45554e-14	1.18946e-12	1	1
AARS	-7.45462	-3.45462	1.93964e-10	3.69942e-09	1	1
PGAM1	-7.44944	-3.44944	1.81092e-13	4.56131e-12	1	1
CNOT11	-7.44307	-3.44412	2.42623e-07	3.42031e-06	1	1
LAMTOR3	-7.43593	-3.43744	3.46478e-07	4.84227e-06	1	1
PPP2R3C	-7.43432	-3.43433	1.60078e-09	2.82082e-08	1	1
MED8	-7.4287	-3.4287	3.43373e-12	7.64465e-11	1	1
PARS2	-7.42805	-3.42805	1.10094e-13	2.82898e-12	1	1
ATP5D	-7.42617	-3.42702	1.96834e-07	2.79692e-06	1	1
PRCC	-7.42543	-3.42841	6.89988e-07	9.2585e-06	1	1
ZBTB17	-7.42511	-3.42541	6.89678e-08	1.03633e-06	1	1
DHDDS	-7.42391	-3.426	4.82203e-07	6.58432e-06	1	1
ATP5F1	-7.42249	-3.42524	6.33821e-07	8.53052e-06	1	1
NCAPD3	-7.41977	-3.42444	1.08168e-06	1.42044e-05	1	1
SETDB1	-7.4187	-3.4187	8.8477e-18	3.6746e-16	1	1
MRPL53	-7.41093	-3.41138	1.03255e-07	1.52052e-06	1	1
SPC25	-7.40977	-3.40977	8.20613e-10	1.48569e-08	1	1
PPP1R11	-7.40674	-3.4115	1.10246e-06	1.44453e-05	1	1
CRLS1	-7.40484	-3.40484	3.46178e-14	9.38205e-13	1	1
KIF18A	-7.40307	-3.40307	4.79827e-15	1.43089e-13	1	1
MRPL47	-7.40202	-3.40204	5.159e-09	8.63044e-08	1	1
PRPF4	-7.39822	-3.39822	1.70786e-12	3.88472e-11	1	1
ALG1L2	-7.39818	-3.40038	5.08508e-07	6.9329e-06	1	1
ZNF207	-7.39629	-3.39629	2.50629e-15	7.73263e-14	1	1
RPL14	-7.3905	-3.39061	2.61852e-08	4.08898e-07	1	1
ATP6V1D	-7.38688	-3.3878	2.12027e-07	3.00563e-06	1	1
BORA	-7.38155	-3.38155	4.78016e-14	1.27421e-12	1	1
IBA57	-7.38065	-3.38065	2.00648e-12	4.53506e-11	1	1
SMG5	-7.37128	-3.37142	3.29144e-08	5.08193e-07	1	1
GABPA	-7.36333	-3.36333	2.5659e-12	5.75568e-11	1	1
SMC2	-7.36266	-3.36876	1.41442e-06	1.8291e-05	1	1
CLP1	-7.36174	-3.36174	2.15433e-15	6.70473e-14	1	1
ATP6V1H	-7.35967	-3.3597	5.54492e-09	9.25e-08	1	1
RBM28	-7.35934	-3.35934	9.9141e-12	2.13783e-10	1	1
ZNF407	-7.35735	-3.36829	2.55187e-06	3.22977e-05	1	1
SRSF6	-7.34707	-3.34707	1.50183e-14	4.23098e-13	1	1
NEDD1	-7.34627	-3.35292	1.54259e-06	1.98335e-05	1	1
RBBP8	-7.34436	-3.34439	5.72609e-09	9.5344e-08	1	1
HNRNPH1	-7.34142	-3.34142	1.44631e-18	6.66461e-17	1	1
DPH2	-7.33929	-3.34634	1.63638e-06	2.09788e-05	1	1
SPATA5L1	-7.32304	-3.32304	7.86361e-13	1.84759e-11	1	1
ZBTB8OS	-7.31979	-3.3198	9.51269e-10	1.71008e-08	1	1
DMAP1	-7.30783	-3.30783	1.94912e-11	4.1232e-10	1	1
PAXBP1	-7.30374	-3.30386	2.87293e-08	4.4706e-07	1	1
HAUS5	-7.30258	-3.30262	9.44165e-09	1.53765e-07	1	1
RRM2	-7.30225	-3.30225	3.88843e-13	9.39598e-12	1	1
TRMT61A	-7.30092	-3.30092	3.10966e-21	1.94578e-19	1	1
EIF2S2	-7.29762	-3.29769	1.51715e-08	2.42648e-07	1	1
MRPL46	-7.29713	-3.29749	8.21422e-08	1.22376e-06	1	1
EIF4B	-7.29497	-3.29539	9.62118e-08	1.4215e-06	1	1
TIPIN	-7.29332	-3.29332	3.85366e-15	1.16085e-13	1	1
TCEB2	-7.28906	-3.29075	3.87702e-07	5.37209e-06	1	1
CKS1B	-7.28858	-3.28915	1.32083e-07	1.92123e-06	1	1
TAF4	-7.28845	-3.28845	3.88277e-12	8.61212e-11	1	1
CUL2	-7.28659	-3.28659	2.27817e-11	4.80219e-10	1	1
RPL9	-7.2839	-3.285	2.53824e-07	3.5751e-06	1	1
OSGEP	-7.28373	-3.28437	1.48337e-07	2.14367e-06	1	1
UBR4	-7.28297	-3.28297	6.57613e-10	1.19665e-08	1	1
IKBKAP	-7.2788	-3.2788	1.42162e-12	3.26277e-11	1	1
NOP10	-7.27853	-3.27916	1.46538e-07	2.12111e-06	1	1
MRPL16	-7.27635	-3.27641	1.41287e-08	2.26989e-07	1	1
ACIN1	-7.27625	-3.27625	2.14449e-13	5.34117e-12	1	1
AZIN1	-7.27376	-3.27377	2.5229e-09	4.35114e-08	1	1
RPL32	-7.26693	-3.27028	7.75016e-07	1.03372e-05	1	1
ALG11	-7.24575	-3.24598	5.33509e-08	8.08331e-07	1	1
MSL1	-7.24291	-3.24291	1.39198e-17	5.64165e-16	1	1
CABIN1	-7.23425	-3.23434	2.06342e-08	3.25925e-07	1	1
ZBTB11	-7.22974	-3.23471	1.14872e-06	1.49854e-05	1	1
CEP135	-7.22724	-3.22724	1.31087e-09	2.32373e-08	1	1
FAM96B	-7.22147	-3.22147	4.09838e-11	8.35273e-10	1	1
CCNH	-7.22021	-3.22021	6.06227e-13	1.43761e-11	1	1
VPS35	-7.21991	-3.21991	4.09627e-16	1.38613e-14	1	1
C19orf52	-7.21749	-3.21749	1.85754e-13	4.65245e-12	1	1
CTR9	-7.21463	-3.21467	9.17315e-09	1.49666e-07	1	1
POP4	-7.21116	-3.21116	1.70398e-13	4.30543e-12	1	1
ERCC2	-7.20931	-3.20931	2.4753e-14	6.83313e-13	1	1
AHCYL1	-7.20743	-3.20743	1.62733e-23	1.19918e-21	1	1
NUDC	-7.20741	-3.20751	2.24432e-08	3.52936e-07	1	1
COA5	-7.2054	-3.20641	2.34284e-07	3.30536e-06	1	1
DGCR14	-7.2018	-3.2027	2.07118e-07	2.94072e-06	1	1
SCO2	-7.20101	-3.20101	1.20659e-11	2.58308e-10	1	1
COX10	-7.19774	-3.21946	5.12961e-06	6.19339e-05	1	1
TRAIP	-7.19581	-3.19581	1.18212e-13	3.02885e-12	1	1
MRPS24	-7.19433	-3.20649	2.83947e-06	3.56844e-05	1	1
DHX16	-7.19373	-3.19373	1.79678e-12	4.08179e-11	1	1
PSMC4	-7.18823	-3.20417	3.73767e-06	4.59999e-05	1	1
TRMT5	-7.18679	-3.1882	3.23183e-07	4.52735e-06	1	1
PSMA2	-7.18303	-3.20096	4.21371e-06	5.14326e-05	1	1
POLR3A	-7.18131	-3.18131	9.33676e-11	1.83575e-09	1	1
DNTTIP2	-7.17689	-3.17753	1.46686e-07	2.12153e-06	1	1
DDX5	-7.17683	-3.17683	5.00606e-13	1.19509e-11	1	1
NUP62	-7.17626	-3.17626	9.26683e-18	3.81652e-16	1	1
EED	-7.16762	-3.16762	5.86478e-13	1.39263e-11	1	1
FURIN	-7.16148	-3.16148	1.58893e-16	5.73591e-15	1	1
PTCD3	-7.15953	-3.15954	2.19083e-09	3.81162e-08	1	1
ABCF1	-7.15867	-3.15896	6.66356e-08	1.00534e-06	1	1
DDX52	-7.15392	-3.15581	4.36135e-07	5.9966e-06	1	1
COPB2	-7.15116	-3.15116	3.77921e-11	7.76435e-10	1	1
CXorf56	-7.15083	-3.15283	4.61855e-07	6.32099e-06	1	1
C21orf59	-7.14632	-3.14632	3.06278e-12	6.82732e-11	1	1
RBM8A	-7.14601	-3.14601	1.06785e-10	2.09493e-09	1	1
PARG	-7.14145	-3.14145	1.26595e-10	2.4619e-09	1	1
TCEB1	-7.13207	-3.13287	1.85426e-07	2.64537e-06	1	1
TRIT1	-7.12357	-3.12357	4.57112e-12	1.00638e-10	1	1
INTS7	-7.12315	-3.15034	6.46071e-06	7.75851e-05	1	1
SEPHS2	-7.12176	-3.12176	2.34062e-13	5.80532e-12	1	1
SAP18	-7.1198	-3.12247	6.16727e-07	8.30672e-06	1	1
GSG2	-7.11916	-3.11916	9.40525e-10	1.69247e-08	1	1
MIIP	-7.1176	-3.15205	8.25493e-06	9.82056e-05	1	1
PPIL4	-7.11736	-3.11738	4.55816e-09	7.65401e-08	1	1
EIF3F	-7.11733	-3.1198	5.69511e-07	7.72058e-06	1	1
CNOT10	-7.11558	-3.11559	1.3599e-09	2.40586e-08	1	1
RPAIN	-7.10947	-3.10947	2.76752e-20	1.54712e-18	1	1
SHQ1	-7.10613	-3.11274	1.53243e-06	1.9717e-05	1	1
MRPS25	-7.10138	-3.10138	1.84825e-13	4.63571e-12	1	1
MRPS17	-7.10054	-3.10054	3.97609e-11	8.14072e-10	1	1
ITPK1	-7.09843	-3.11558	4.02874e-06	4.93776e-05	1	1
DDX55	-7.09565	-3.09565	1.33993e-13	3.40869e-12	1	1
KANSL1	-7.09385	-3.09388	5.76333e-09	9.58746e-08	1	1
MIS12	-7.08711	-3.10111	3.27627e-06	4.07431e-05	1	1
NUP153	-7.08564	-3.09576	2.35761e-06	2.99453e-05	1	1
RPL28	-7.08436	-3.08436	1.12018e-12	2.60106e-11	1	1
RPL30	-7.08272	-3.0997	3.98732e-06	4.89036e-05	1	1
HUS1	-7.08075	-3.08075	3.32433e-11	6.88535e-10	1	1
RAC1	-7.08063	-3.08063	2.52905e-18	1.13318e-16	1	1
ESPL1	-7.07883	-3.08571	1.59661e-06	2.05132e-05	1	1
FAM32A	-7.07633	-3.07636	7.40046e-09	1.21746e-07	0.0806514	0.698865
GSPT1	-7.0742	-3.0742	9.44857e-12	2.03991e-10	1	1
PCID2	-7.07213	-3.07213	3.22824e-13	7.8754e-12	1	1
GNL3L	-7.07045	-3.07305	5.995e-07	8.09916e-06	1	1
DHX37	-7.06825	-3.07192	8.48842e-07	1.12629e-05	1	1
LIN7C	-7.06641	-3.06641	1.56166e-18	7.15914e-17	1	1
TSFM	-7.05886	-3.10184	1.04023e-05	0.000122042	1	1
SUDS3	-7.05838	-3.06017	4.12025e-07	5.68703e-06	1	1
RBBP6	-7.05835	-3.05835	1.51269e-10	2.9163e-09	1	1
UBE2C	-7.05031	-3.05031	6.09386e-20	3.31316e-18	1	1
SKP2	-7.04744	-3.14944	2.64724e-05	0.000298975	1	1
SPOP	-7.04471	-3.04471	1.37929e-12	3.17379e-11	1	1
ELP6	-7.04066	-3.05145	2.51664e-06	3.18971e-05	1	1
MRPL9	-7.03955	-3.03958	7.9063e-09	1.29589e-07	1	1
U2SURP	-7.03838	-3.03839	3.3501e-10	6.23615e-09	1	1
MBTPS2	-7.0344	-3.03447	1.46182e-08	2.3443e-07	1	1
ATP5A1	-7.03253	-3.03253	5.65762e-11	1.13874e-09	1	1
TFB2M	-7.03156	-3.03156	3.1433e-13	7.6787e-12	0.484138	1
MCM3AP	-7.02751	-3.02751	7.46392e-11	1.47894e-09	1	1
SCFD1	-7.02393	-3.06245	9.27571e-06	0.000109618	1	1
DENR	-7.02075	-3.02075	2.80967e-13	6.91102e-12	1	1
DCAF13	-7.01988	-3.01992	9.83509e-09	1.59735e-07	1	1
PSMC5	-7.01988	-3.02176	4.34617e-07	5.98034e-06	1	1
NSMCE4A	-7.01782	-3.01786	1.08273e-08	1.74736e-07	1	1
NDUFB4	-7.01433	-3.01433	1.7601e-15	5.56524e-14	1	1
DNAAF5	-7.00405	-3.00405	1.06376e-14	3.04496e-13	1	1
ATXN10	-7.00359	-3.00359	3.40404e-13	8.29292e-12	1	1
DDX28	-7.00319	-3.00319	1.10593e-10	2.16725e-09	1	1
GLE1	-7.00154	-3.0237	5.23643e-06	6.31381e-05	1	1
AP2S1	-6.99739	-2.99804	1.52032e-07	2.19113e-06	1	1
ASNA1	-6.99506	-2.99559	1.20237e-07	1.75753e-06	1	1
PMPCA	-6.99197	-2.99197	6.52477e-11	1.30591e-09	1	1
DNAJC11	-6.99036	-2.99036	3.8984e-10	7.20417e-09	1	1
RPRD2	-6.98891	-3.05563	1.66044e-05	0.000192027	1	1
PSMD3	-6.98485	-2.9864	3.57529e-07	4.985e-06	1	1
MCPH1	-6.97756	-2.97756	4.12949e-11	8.39694e-10	1	1
RANBP2	-6.97385	-2.97385	2.91238e-13	7.15378e-12	1	1
POLR1E	-6.97374	-2.98552	2.74874e-06	3.46419e-05	1	1
PTP4A1	-6.97076	-2.97076	5.27587e-14	1.39591e-12	1	1
CHTF18	-6.96861	-2.96876	3.3885e-08	5.21353e-07	1	1
COG3	-6.96726	-2.9675	5.42713e-08	8.21579e-07	1	1
TMEM258	-6.96695	-2.9674	1.04824e-07	1.54107e-06	1	1
NUP155	-6.94068	-2.94068	1.86447e-14	5.2033e-13	1	1
DHX38	-6.93807	-2.93807	1.27622e-13	3.25592e-12	1	1
SRPRB	-6.93547	-2.94172	1.44997e-06	1.871e-05	1	1
CDK13	-6.9352	-2.9352	1.10893e-16	4.05238e-15	1	1
TONSL	-6.93317	-2.94863	3.62263e-06	4.46767e-05	1	1
GTF3C5	-6.93036	-2.94166	2.63659e-06	3.32756e-05	1	1
WDR55	-6.93011	-2.93011	5.26885e-12	1.15146e-10	1	1
POLR3F	-6.9298	-2.9298	1.50365e-10	2.902e-09	1	1
ALG8	-6.92862	-2.92862	2.45128e-10	4.61115e-09	1	1
KAT8	-6.92683	-2.95835	7.52751e-06	9.00323e-05	1	1
RPAP2	-6.92539	-2.93159	1.4382e-06	1.85716e-05	1	1
GART	-6.92476	-2.92484	1.88921e-08	2.98937e-07	1	1
ATP6V0D1	-6.92426	-2.92755	7.59079e-07	1.01397e-05	1	1
CLASP1	-6.91661	-2.91662	1.88374e-09	3.30312e-08	1	1
TIMM44	-6.91439	-2.91439	3.01586e-19	1.47752e-17	1	1
CLSPN	-6.91298	-2.91298	1.93377e-12	4.38183e-11	1	1
CSTF1	-6.91287	-2.91287	2.55638e-10	4.79369e-09	1	1
RECQL4	-6.91166	-2.91166	1.54155e-12	3.52894e-11	1	1
VWA9	-6.91113	-2.91545	9.99496e-07	1.3164e-05	1	1
WARS2	-6.9064	-2.91337	1.61809e-06	2.07592e-05	1	1
RNASEK	-6.90399	-2.91495	2.55545e-06	3.232e-05	1	1
TINF2	-6.90264	-2.92046	4.18842e-06	5.1159e-05	1	1
RAD50	-6.90163	-2.90163	3.55855e-14	9.62969e-13	1	1
THOC7	-6.8944	-2.89651	4.88876e-07	6.67034e-06	1	1
NDUFS1	-6.88692	-2.88692	1.52904e-15	4.8605e-14	1	1
SAMM50	-6.88686	-2.88686	4.5887e-12	1.00901e-10	1	1
IMPDH2	-6.88301	-2.88301	4.83705e-13	1.15701e-11	1	1
DDX21	-6.88271	-2.88271	7.89259e-12	1.71436e-10	1	1
CCNB1	-6.88253	-2.88254	2.20099e-09	3.82556e-08	1	1
TSEN2	-6.87581	-2.87581	1.26265e-11	2.69662e-10	1	1
PDCL3	-6.87024	-2.87029	1.01891e-08	1.64734e-07	1	1
HIRA	-6.86826	-2.86826	5.49171e-12	1.1987e-10	1	1
TFAM	-6.8668	-2.8668	7.55333e-11	1.49429e-09	1	1
WEE1	-6.86417	-2.87913	3.50347e-06	4.33871e-05	1	1
CHMP2A	-6.85717	-2.85717	3.74731e-11	7.72553e-10	1	1
PSMD7	-6.85681	-2.85681	5.49117e-11	1.10774e-09	1	1
EIF3H	-6.85243	-2.85243	2.61587e-11	5.47521e-10	1	1
SRP19	-6.84148	-2.84148	6.32771e-11	1.26931e-09	1	1
JUNB	-6.84064	-2.84064	2.75692e-11	5.76368e-10	1	1
NGLY1	-6.8388	-2.8388	3.88454e-14	1.04642e-12	1	1
TAF5	-6.83638	-2.83638	2.01915e-14	5.6174e-13	1	1
TUFM	-6.82203	-2.82203	8.90651e-12	1.92755e-10	1	1
RPL37A	-6.82077	-2.82077	3.82021e-10	7.07433e-09	1	1
SNRPD2	-6.81334	-2.91509	2.63996e-05	0.000298342	1	1
SMARCA5	-6.81284	-2.81285	2.67669e-09	4.60303e-08	1	1
TTI1	-6.8093	-2.8093	4.75677e-12	1.04339e-10	1	1
ANAPC2	-6.80754	-2.83772	7.1957e-06	8.62372e-05	1	1
PSMD1	-6.80714	-2.80753	8.99289e-08	1.33419e-06	1	1
UTP14A	-6.80354	-2.80354	5.64966e-11	1.13842e-09	1	1
MRPL17	-6.80306	-2.80474	3.88045e-07	5.37268e-06	1	1
MRPL41	-6.80274	-2.80274	2.31806e-10	4.37902e-09	1	1
VDAC2	-6.80255	-2.80267	2.81788e-08	4.39258e-07	1	1
HNRNPA2B1	-6.80038	-2.8004	4.49556e-09	7.55601e-08	1	1
DCTN1	-6.79585	-2.80325	1.7176e-06	2.19884e-05	1	1
TRUB2	-6.79474	-2.79474	1.54006e-11	3.27732e-10	1	1
TFB1M	-6.79274	-2.8034	2.48626e-06	3.15569e-05	1	1
HNRNPA1	-6.79026	-2.80936	4.49619e-06	5.45446e-05	1	1
SPCS2	-6.78887	-2.79045	3.6398e-07	5.05913e-06	1	1
VPS45	-6.78529	-2.78529	1.27366e-15	4.07045e-14	1	1
ZC3H4	-6.78425	-2.78908	1.11803e-06	1.46172e-05	1	1
SUPT16H	-6.77948	-2.77954	1.4074e-08	2.26314e-07	1	1
SEH1L	-6.77504	-2.77877	8.61393e-07	1.1421e-05	1	1
GMPPB	-6.77134	-2.77137	6.92749e-09	1.14387e-07	1	1
RPL8	-6.77038	-2.78835	4.22329e-06	5.15143e-05	1	1
IPO9	-6.76787	-2.76798	2.4847e-08	3.89023e-07	1	1
BRD8	-6.76706	-2.76757	1.19106e-07	1.74243e-06	1	1
SNAPC4	-6.76251	-2.76251	2.60701e-13	6.4481e-12	1	1
MPHOSPH10	-6.75987	-2.7634	8.16062e-07	1.08522e-05	1	1
NOL8	-6.75131	-2.75131	7.70309e-14	2.00832e-12	1	1
NUP160	-6.74835	-2.74835	3.19355e-10	5.96341e-09	1	1
PPIH	-6.74438	-2.74438	1.39687e-12	3.2101e-11	1	1
TADA3	-6.73845	-2.73852	1.50606e-08	2.41092e-07	1	1
DARS	-6.73753	-2.73773	4.7138e-08	7.17245e-07	1	1
PIK3C3	-6.73607	-2.73841	5.41285e-07	7.36288e-06	1	1
MED19	-6.73548	-2.73718	3.92497e-07	5.4301e-06	1	1
SDE2	-6.73228	-2.73539	7.1963e-07	9.64174e-06	1	1
UBR5	-6.72857	-2.72861	7.84697e-09	1.28735e-07	1	1
MUS81	-6.72617	-2.72617	1.47415e-16	5.3432e-15	1	1
TPRKB	-6.72408	-2.74332	4.53048e-06	5.49232e-05	1	1
TRIM37	-6.71582	-2.71582	1.23455e-12	2.84808e-11	1	1
SF3A3	-6.70833	-2.70833	4.09256e-12	9.05492e-11	1	1
PPP1R7	-6.70788	-2.70844	1.29509e-07	1.88688e-06	1	1
DAP3	-6.70683	-2.70683	7.88125e-10	1.42977e-08	1	1
ZNF808	-6.70483	-2.70537	1.24859e-07	1.8221e-06	1	1
EEF1G	-6.70478	-2.71122	1.49265e-06	1.92469e-05	1	1
TBCE	-6.69454	-2.69759	7.04818e-07	9.45039e-06	1	1
KCMF1	-6.68418	-2.68418	6.42471e-11	1.28732e-09	1	1
ARFRP1	-6.68361	-2.69712	3.15869e-06	3.95085e-05	1	1
LTV1	-6.68171	-2.68587	9.62634e-07	1.27066e-05	1	1
RRAGC	-6.68064	-2.68638	1.33196e-06	1.72874e-05	1	1
USO1	-6.67922	-2.67922	2.08048e-15	6.50897e-14	1	1
CDK11B	-6.67115	-2.67304	4.37657e-07	6.0129e-06	1	1
ATAD5	-6.66687	-2.68943	5.33401e-06	6.42713e-05	1	1
TAF1	-6.66246	-2.67704	3.41261e-06	4.23501e-05	1	1
USP22	-6.65954	-2.66471	1.19843e-06	1.55884e-05	1	1
GRB2	-6.65895	-2.66121	5.23405e-07	7.13054e-06	1	1
HCFC1	-6.65358	-2.65358	5.21513e-13	1.24167e-11	1	1
NDUFB6	-6.6532	-2.6532	7.45492e-11	1.47879e-09	1	1
NLE1	-6.65265	-2.65614	8.05516e-07	1.0736e-05	1	1
NAA15	-6.65097	-2.65097	3.01836e-13	7.39373e-12	1	1
C11orf57	-6.64626	-2.64626	2.04324e-12	4.61229e-11	1	1
GFM2	-6.64512	-2.64512	4.52097e-16	1.51831e-14	1	1
COX6B1	-6.64474	-2.64474	1.31557e-10	2.55284e-09	1	1
COPS3	-6.64387	-2.64457	1.61901e-07	2.32837e-06	1	1
TOP3A	-6.6411	-2.6411	8.29881e-18	3.49039e-16	1	1
CRKL	-6.64072	-2.64072	1.07554e-15	3.45587e-14	1	1
FANCF	-6.63958	-2.63958	6.96452e-16	2.29148e-14	1	1
NOL7	-6.63793	-2.6553	4.08084e-06	4.99657e-05	1	1
POLR3B	-6.63606	-2.69743	1.51795e-05	0.000175891	1	1
SRRT	-6.63529	-2.63529	2.99504e-10	5.60446e-09	1	1
NDUFV2	-6.63409	-2.63409	4.20731e-12	9.28576e-11	1	1
CDC5L	-6.62888	-2.63449	1.30086e-06	1.69083e-05	1	1
POP5	-6.6277	-2.6432	3.63257e-06	4.47682e-05	1	1
DDX20	-6.62559	-2.66454	9.38244e-06	0.000110806	1	1
INO80B	-6.62535	-2.63923	3.248e-06	4.04198e-05	1	1
URB2	-6.62518	-2.62519	2.07906e-09	3.62778e-08	1	1
POLR1B	-6.62153	-2.62153	8.83652e-11	1.74123e-09	1	1
CDK2	-6.62109	-2.62109	8.00958e-14	2.07911e-12	1	1
CBX8	-6.61969	-2.61969	7.14951e-11	1.42296e-09	1	1
CDK1	-6.61709	-2.62401	1.60823e-06	2.06476e-05	1	1
TUBB4B	-6.61659	-2.61659	1.89272e-18	8.54503e-17	1	1
TARS2	-6.61363	-2.66614	1.28527e-05	0.000149512	1	1
CDC45	-6.61335	-2.61335	1.78892e-10	3.4303e-09	1	1
RARS	-6.6121	-2.6121	2.65025e-12	5.92997e-11	1	1
ANKRD17	-6.61119	-2.61119	4.29725e-13	1.03279e-11	1	1
DSCC1	-6.60693	-2.60693	4.98166e-17	1.89824e-15	1	1
NDUFB11	-6.60584	-2.60584	3.99661e-11	8.16398e-10	1	1
FANCG	-6.60496	-2.60496	4.16993e-15	1.254e-13	1	1
PSME3	-6.60253	-2.60254	2.09343e-09	3.64928e-08	1	1
EIF3A	-6.60155	-2.60155	3.50032e-11	7.23304e-10	1	1
ZW10	-6.59372	-2.59372	1.95745e-12	4.42984e-11	1	1
MRPS14	-6.59122	-2.61417	5.42708e-06	6.53485e-05	1	1
GTF3C6	-6.59022	-2.62396	8.07883e-06	9.6239e-05	1	1
TPX2	-6.58553	-2.58553	2.43132e-10	4.57842e-09	1	1
ZMAT5	-6.58102	-2.59635	3.59436e-06	4.44201e-05	1	1
ASNS	-6.57995	-2.57995	3.3843e-11	7.00141e-10	1	1
UBIAD1	-6.57941	-2.57941	5.69156e-11	1.14428e-09	1	1
RHNO1	-6.57897	-2.57897	4.90946e-12	1.07556e-10	1	1
PTPN23	-6.57855	-2.57855	1.03262e-09	1.84331e-08	1	1
MED24	-6.57519	-2.5752	2.48184e-09	4.28448e-08	1	1
MPP6	-6.57205	-2.57227	5.04323e-08	7.66065e-07	1	1
ZNF622	-6.5688	-2.56882	6.53912e-09	1.08074e-07	1	1
CARNMT1	-6.56748	-2.56748	7.55817e-11	1.49429e-09	1	1
TLN1	-6.56582	-2.56582	2.16342e-13	5.3733e-12	1	1
CHORDC1	-6.56253	-2.56253	1.89377e-12	4.29665e-11	1	1
RIC1	-6.55823	-2.55823	2.04016e-10	3.87457e-09	1	1
JMJD6	-6.55536	-2.55536	1.67135e-10	3.2083e-09	1	1
FDXR	-6.55472	-2.6147	1.48111e-05	0.000171733	1	1
ELOF1	-6.55435	-2.56911	3.45808e-06	4.28845e-05	1	1
C15orf39	-6.55329	-2.55329	1.83534e-13	4.60982e-12	1	1
OSBP	-6.54845	-2.7689	6.61302e-05	0.000698223	1	1
DRAP1	-6.54588	-2.54588	1.03712e-09	1.84949e-08	0.988749	1
ZFX	-6.54261	-2.54263	6.2716e-09	1.03845e-07	1	1
CMTR1	-6.54041	-2.54041	1.7646e-11	3.74176e-10	1	1
SART1	-6.5377	-2.5377	2.40115e-14	6.64903e-13	1	1
CXXC1	-6.53685	-2.65673	3.17904e-05	0.000353881	1	1
RPL35	-6.53554	-2.57736	1.01079e-05	0.000119059	1	1
CLASRP	-6.5297	-2.53004	7.8794e-08	1.17683e-06	1	1
PGLS	-6.52612	-2.52612	1.05723e-11	2.27152e-10	1	1
CCT2	-6.51586	-2.51634	1.10588e-07	1.6218e-06	1	1
ALKBH8	-6.51458	-2.51458	3.7678e-11	7.74985e-10	1	1
PDRG1	-6.50958	-2.50992	7.79142e-08	1.16466e-06	1	1
STX18	-6.50568	-2.50569	1.24053e-10	2.41511e-09	1	1
ATP6V1G1	-6.50528	-2.5056	7.37702e-08	1.10457e-06	1	1
SYMPK	-6.50312	-2.51835	3.5682e-06	4.41274e-05	1	1
CWF19L2	-6.5	-2.51338	3.12935e-06	3.91894e-05	1	1
ATP6V1C1	-6.49829	-2.5137	3.61214e-06	4.45781e-05	1	1
NDUFAF3	-6.49453	-2.49453	7.03211e-15	2.05514e-13	1	1
TIMMDC1	-6.48484	-2.48484	1.34099e-10	2.59651e-09	1	1
COX5A	-6.48279	-2.48332	1.22256e-07	1.78558e-06	1	1
ERCC3	-6.48203	-2.48203	9.30461e-10	1.67605e-08	1	1
UPF2	-6.47772	-2.53328	1.36459e-05	0.000158636	1	1
CHMP7	-6.4768	-2.60923	3.56517e-05	0.000391971	1	1
SOD1	-6.46963	-2.46963	1.65838e-12	3.78183e-11	1	1
BAP1	-6.46517	-2.46517	1.15634e-14	3.30466e-13	1	1
PTDSS1	-6.46469	-2.4647	9.61463e-10	1.72666e-08	1	1
RPAP1	-6.46309	-2.5573	2.42261e-05	0.000274301	1	1
ATAD3A	-6.46175	-2.46175	1.21507e-11	2.59812e-10	1	1
NUP85	-6.45794	-2.45796	4.02409e-09	6.7956e-08	1	1
AKIRIN2	-6.45682	-2.45698	3.89382e-08	5.95016e-07	1	1
ERCC1	-6.45555	-2.45555	7.51465e-10	1.36465e-08	1	1
FTSJ3	-6.45022	-2.4609	2.48962e-06	3.15771e-05	1	1
IDH3A	-6.4461	-2.53465	2.26155e-05	0.000257537	1	1
XRN2	-6.44351	-2.44351	9.94792e-10	1.78114e-08	1	1
PSMB2	-6.44346	-2.65092	6.12328e-05	0.000649978	1	1
GOLT1B	-6.44098	-2.44099	3.30524e-09	5.61891e-08	1	1
PSMA5	-6.43656	-2.45395	4.08347e-06	4.99657e-05	1	1
PRPF4B	-6.436	-2.43605	1.17112e-08	1.88659e-07	1	1
PGP	-6.43531	-2.43533	3.02631e-09	5.16936e-08	1	1
AURKB	-6.43258	-2.4361	8.12356e-07	1.08191e-05	1	1
GTPBP4	-6.4315	-2.4315	1.79748e-10	3.44301e-09	1	1
ATP5J2	-6.43069	-2.43197	2.95826e-07	4.15064e-06	1	1
DDX27	-6.42773	-2.46351	8.58719e-06	0.000101819	1	1
TTF1	-6.42519	-2.55261	3.40972e-05	0.000377151	1	1
DIS3	-6.4226	-2.4226	2.02982e-10	3.85905e-09	1	1
AMD1	-6.42259	-2.42259	8.46536e-15	2.4507e-13	1	1
TAF6	-6.41737	-2.43089	3.16289e-06	3.95085e-05	1	1
PCF11	-6.41	-2.41	2.99856e-11	6.23232e-10	1	1
MIOS	-6.40802	-2.40802	1.86356e-11	3.9469e-10	1	1
LSM4	-6.40311	-2.40798	1.12578e-06	1.47077e-05	1	1
MEAF6	-6.40305	-2.40305	1.23057e-10	2.39833e-09	1	1
HNRNPK	-6.3965	-2.42149	5.92272e-06	7.12204e-05	1	1
KIF23	-6.39566	-2.55544	4.44694e-05	0.00048414	1	1
SMARCE1	-6.39413	-2.40565	2.68783e-06	3.38982e-05	1	1
ELP2	-6.39144	-2.39144	2.77584e-11	5.78965e-10	1	1
RPL13	-6.38805	-2.45897	1.77395e-05	0.000204096	1	1
C20orf24	-6.37889	-2.37889	1.66367e-11	3.53615e-10	1	1
H2AFX	-6.3787	-2.3787	1.61436e-09	2.84195e-08	1	1
MRPS12	-6.37462	-2.48091	2.77306e-05	0.000311803	1	1
GTF2E2	-6.37199	-2.37199	2.07336e-09	3.62137e-08	1	1
TAF10	-6.36797	-2.36799	4.03613e-09	6.80948e-08	1	1
U2AF2	-6.36307	-2.37816	3.53374e-06	4.37316e-05	1	1
SKA1	-6.35099	-2.35103	8.95233e-09	1.46197e-07	1	1
SLC25A28	-6.34979	-2.34979	7.89399e-10	1.43062e-08	1	1
MRPL2	-6.34532	-2.55511	6.21018e-05	0.000658811	1	1
PRPF6	-6.34499	-2.34503	7.96157e-09	1.30375e-07	1	1
PTPMT1	-6.34232	-2.35557	3.09826e-06	3.88273e-05	1	1
FLCN	-6.3395	-2.34212	6.04593e-07	8.16178e-06	1	1
ARPC2	-6.3311	-2.3311	6.86331e-12	1.49442e-10	1	1
C14orf166	-6.33058	-2.33062	9.22151e-09	1.50317e-07	1	1
PWP1	-6.33016	-2.33017	1.91433e-09	3.35347e-08	1	1
POLRMT	-6.32658	-2.45537	3.45213e-05	0.000381188	0.209229	0.994425
THG1L	-6.32621	-2.32621	4.59426e-11	9.33137e-10	1	1
RBM48	-6.32608	-2.40091	1.88038e-05	0.000215923	1	1
GEMIN4	-6.32222	-2.44969	3.41135e-05	0.000377151	1	1
COQ4	-6.32044	-2.32044	4.32553e-14	1.15996e-12	1	1
WBP11	-6.31674	-2.36033	1.05574e-05	0.000123699	1	1
RGP1	-6.315	-2.315	4.87875e-10	8.93252e-09	1	1
API5	-6.31091	-2.31092	1.29332e-09	2.2949e-08	1	1
XRCC1	-6.30926	-2.30926	1.30349e-13	3.32072e-12	1	1
DDX41	-6.30668	-2.30674	1.53805e-08	2.45771e-07	1	1
TTF2	-6.30383	-2.30392	2.19242e-08	3.45383e-07	1	1
CPSF1	-6.30355	-2.30355	3.75683e-11	7.73622e-10	1	1
RPS17	-6.30343	-2.30403	1.38775e-07	2.01529e-06	1	1
UBA52	-6.29916	-2.49376	5.65313e-05	0.000604752	1	1
DUT	-6.29225	-2.33922	1.14223e-05	0.000133482	0.116939	0.799995
RBM39	-6.28601	-2.28601	2.08355e-10	3.94436e-09	1	1
LARS	-6.28559	-2.28559	3.2758e-10	6.1106e-09	1	1
PRRC2A	-6.28293	-2.28298	9.97803e-09	1.61615e-07	1	1
GATB	-6.28248	-2.29784	3.5994e-06	4.44516e-05	1	1
PCBP1	-6.28049	-2.29236	2.77058e-06	3.48678e-05	1	1
CEBPZ	-6.27837	-2.27838	1.91494e-10	3.65887e-09	1	1
NFYB	-6.27818	-2.29312	3.50147e-06	4.33871e-05	1	1
EMC1	-6.27795	-2.28189	9.11708e-07	1.20702e-05	1	1
NHEJ1	-6.27697	-2.27698	1.25737e-09	2.23333e-08	1	1
VPS28	-6.27572	-2.27623	1.16513e-07	1.70729e-06	1	1
TLK2	-6.26438	-2.26439	1.57884e-09	2.78491e-08	1	1
EIF1AD	-6.26373	-2.26373	1.00819e-11	2.17138e-10	1	1
ATP5H	-6.25742	-2.37951	3.24609e-05	0.000360221	1	1
PCYT1A	-6.25732	-2.26829	2.56019e-06	3.2357e-05	1	1
DHX36	-6.25165	-2.25166	2.23837e-09	3.87919e-08	1	1
GTF2E1	-6.25141	-2.25141	4.74948e-13	1.13994e-11	1	1
ELP3	-6.24246	-2.24263	3.83709e-08	5.87859e-07	1	1
LSM11	-6.23504	-2.23504	1.55097e-10	2.98364e-09	1	1
SPC24	-6.23331	-2.51975	9.33911e-05	0.000972806	1	1
SSB	-6.2332	-2.23374	1.25878e-07	1.83547e-06	1	1
MRPL13	-6.23241	-2.28055	1.17245e-05	0.000136924	1	1
FGFR1OP	-6.23041	-2.23055	3.35543e-08	5.17177e-07	1	1
CAND1	-6.22885	-2.22885	5.11961e-13	1.22056e-11	1	1
SOD2	-6.22863	-2.30344	1.8799e-05	0.000215923	1	1
HAUS6	-6.22324	-2.22389	1.51514e-07	2.18605e-06	1	1
NDUFB2	-6.22166	-2.22166	2.6557e-10	4.97469e-09	1	1
LEO1	-6.21219	-2.21473	5.85446e-07	7.92129e-06	1	1
TANGO6	-6.20696	-2.24218	8.44901e-06	0.000100314	1	1
NDUFS8	-6.2045	-2.2045	1.13792e-11	2.43902e-10	1	1
FIP1L1	-6.19018	-2.31029	3.18591e-05	0.000354425	1	1
KARS	-6.18916	-2.20099	2.76142e-06	3.47772e-05	1	1
RACGAP1	-6.18914	-2.23744	1.17631e-05	0.000137285	1	1
RNF8	-6.18612	-2.18612	4.84006e-13	1.15701e-11	1	1
THOC1	-6.18602	-2.27538	2.28448e-05	0.000259816	1	1
DOHH	-6.17715	-2.17719	7.20693e-09	1.18781e-07	1	1
DNAJA3	-6.17552	-2.28771	2.94747e-05	0.000329958	1	1
ICMT	-6.17431	-2.17792	8.35069e-07	1.10885e-05	1	1
MCRS1	-6.16998	-2.17035	8.66456e-08	1.28977e-06	1	1
NDUFV1	-6.16833	-2.16833	4.38561e-10	8.07106e-09	1	1
WAC	-6.16669	-2.20862	1.01366e-05	0.000119317	1	1
OPA1	-6.16409	-2.16409	4.80202e-11	9.73119e-10	1	1
NVL	-6.16225	-2.18083	4.37241e-06	5.31152e-05	1	1
BARD1	-6.16191	-2.16192	3.20406e-09	5.46252e-08	1	1
RPS16	-6.16007	-2.16523	1.19466e-06	1.55506e-05	1	1
DPH1	-6.15876	-2.15876	2.98115e-11	6.20338e-10	1	1
GAPDH	-6.15866	-2.26176	2.6793e-05	0.000302023	1	1
BRAF	-6.15807	-2.15807	1.28411e-10	2.49451e-09	1	1
TAF2	-6.15657	-2.37627	6.58448e-05	0.000696035	1	1
ITGB5	-6.15137	-2.15137	2.53905e-11	5.33949e-10	1	1
GRSF1	-6.14546	-2.17239	6.39779e-06	7.68813e-05	1	1
COG7	-6.13965	-2.13966	1.01123e-09	1.80695e-08	1	1
EXOC4	-6.1368	-2.31821	5.18493e-05	0.000557677	1	1
SLF2	-6.13646	-2.13665	4.35882e-08	6.63799e-07	1	1
DDX6	-6.13441	-2.26988	3.66064e-05	0.000401971	1	1
LIPT2	-6.13408	-2.13408	6.7131e-13	1.58563e-11	1	1
DDX39B	-6.12832	-2.43595	0.000103064	0.00106671	1	1
MTOR	-6.12768	-2.12768	5.30872e-10	9.70979e-09	1	1
MRPS34	-6.12382	-2.20596	2.08196e-05	0.000237693	1	1
FANCI	-6.12255	-2.127	1.03058e-06	1.35634e-05	1	1
SYNCRIP	-6.12248	-2.12248	1.22954e-12	2.84021e-11	1	1
TXN2	-6.12176	-2.12206	6.89803e-08	1.03633e-06	1	1
NSUN4	-6.12163	-2.12163	6.49773e-10	1.1836e-08	1	1
SNAPC3	-6.12069	-2.31904	5.78873e-05	0.000617776	1	1
ADRM1	-6.11639	-2.11639	1.32132e-10	2.56122e-09	1	1
CSNK2B	-6.11509	-2.27695	4.51663e-05	0.000491429	1	1
RBM5	-6.11105	-2.11108	5.7752e-09	9.59824e-08	1	1
CHMP3	-6.1085	-2.16786	1.46452e-05	0.00016992	1	1
EXOC1	-6.10806	-2.17789	1.74451e-05	0.000201098	1	1
CPSF6	-6.10002	-2.22262	3.26167e-05	0.0003615	1	1
SPICE1	-6.09915	-2.09917	5.92653e-09	9.84059e-08	1	1
KAT5	-6.09687	-2.13951	1.03156e-05	0.000121125	0.323645	1
CENPN	-6.09599	-2.09599	5.93459e-10	1.08212e-08	1	1
BUD31	-6.09335	-2.09335	4.29429e-10	7.91935e-09	1	1
GMNN	-6.09082	-2.09148	1.50849e-07	2.17821e-06	1	1
ACTR5	-6.08961	-2.08961	2.48729e-10	4.66904e-09	1	1
EP400	-6.08739	-2.08742	5.50281e-09	9.18835e-08	1	1
TPR	-6.08488	-2.08549	1.41522e-07	2.0535e-06	1	1
BCL2L1	-6.08353	-2.08353	3.11261e-11	6.45432e-10	1	1
GPATCH1	-6.07999	-2.07999	7.70562e-11	1.52175e-09	1	1
UFC1	-6.07436	-2.07436	2.3272e-10	4.39163e-09	1	1
NAMPT	-6.07373	-2.07385	2.85894e-08	4.4527e-07	1	1
DGCR8	-6.07191	-2.14181	1.74604e-05	0.000201144	1	1
SRSF10	-6.07005	-2.43917	0.00013395	0.0013689	1	1
HNRNPM	-6.06995	-2.10813	9.18907e-06	0.000108666	1	1
BANF1	-6.06337	-2.14046	1.94234e-05	0.00022275	1	1
HAUS8	-6.06233	-2.07089	1.99069e-06	2.53752e-05	1	1
NOP58	-6.06183	-2.08381	5.19063e-06	6.26282e-05	1	1
ZNHIT1	-6.06032	-2.10296	1.03174e-05	0.000121125	1	1
ZNF131	-6.05962	-2.16922	2.87066e-05	0.000322168	1	1
TTC7A	-6.0579	-2.05792	4.38913e-09	7.38409e-08	1	1
DHODH	-6.05396	-2.05567	3.95975e-07	5.47397e-06	1	1
MNAT1	-6.05252	-2.15739	2.73119e-05	0.00030729	0.496819	1
MRE11A	-6.04643	-2.12786	2.06223e-05	0.000235742	1	1
PRMT1	-6.04318	-2.34924	0.000102333	0.00106038	1	1
PELP1	-6.04315	-2.04777	1.07075e-06	1.40712e-05	1	1
SENP6	-6.04169	-2.04183	3.1707e-08	4.90825e-07	1	1
NFU1	-6.04116	-2.04128	2.98336e-08	4.63032e-07	1	1
FAM50A	-6.03811	-2.04004	4.43613e-07	6.08534e-06	1	1
EEFSEC	-6.03679	-2.03691	2.56567e-08	4.00995e-07	1	1
NUP35	-6.03366	-2.03366	8.37814e-11	1.65274e-09	1	1
NPM1	-6.03353	-2.03355	4.67467e-09	7.84227e-08	1	1
RAB3GAP2	-6.02831	-2.02876	1.04796e-07	1.54107e-06	1	1
PPIL2	-6.02688	-2.02689	1.33118e-09	2.35739e-08	1	1
NSF	-6.02579	-2.02579	3.87915e-11	7.95136e-10	1	1
PTGES3	-6.02572	-2.08715	1.51932e-05	0.000175935	1	1
EPRS	-6.02536	-2.02536	8.72083e-10	1.57567e-08	1	1
EIF6	-6.02245	-2.02599	8.1824e-07	1.08731e-05	1	1
HSPA5	-6.01803	-2.12235	2.71514e-05	0.000305869	1	1
MLST8	-6.0172	-2.14535	3.4325e-05	0.000379255	1	1
POLR2D	-6.01598	-2.0867	1.7684e-05	0.000203589	1	1
UFSP2	-6.01538	-2.01556	4.06515e-08	6.20135e-07	1	1
MRPL20	-6.01372	-2.01423	1.18696e-07	1.73786e-06	1	1
DNAJC9	-6.01309	-2.01309	9.57837e-13	2.23282e-11	1	1
ANAPC1	-6.01184	-2.2185	6.09389e-05	0.000647245	1	1
NELFA	-6.01042	-2.01132	2.07781e-07	2.94778e-06	0.538228	1
GTF3A	-6.00476	-2.07268	1.69291e-05	0.000195529	1	1
FBXO5	-6.00345	-2.22615	6.69925e-05	0.00070691	1	1
SYVN1	-6.0014	-2.00181	9.49873e-08	1.4069e-06	1	1
CD3EAP	-6.00117	-2.07027	1.72451e-05	0.000198921	1	1
RTTN	-5.99921	-1.99921	5.5309e-10	1.01058e-08	1	1
EIF4ENIF1	-5.99866	-1.99866	1.3453e-12	3.09957e-11	1	1
UBA3	-5.98975	-1.98975	1.17629e-10	2.30008e-09	1	1
MCM4	-5.98285	-2.05904	1.91747e-05	0.00022004	1	1
NELFCD	-5.97954	-1.97955	1.54105e-09	2.72094e-08	1	1
RPS15	-5.97896	-1.97896	1.90606e-10	3.64708e-09	1	1
THOC2	-5.9788	-2.0609	2.0809e-05	0.000237693	1	1
UBE2M	-5.97566	-2.03204	1.3862e-05	0.000160938	1	1
ACTR3	-5.97307	-1.97307	7.44567e-11	1.4786e-09	1	1
MAEA	-5.96978	-1.97158	4.15649e-07	5.73261e-06	1	1
B3GNT2	-5.96807	-1.96845	8.74392e-08	1.3005e-06	1	1
CIR1	-5.96721	-1.96732	2.40127e-08	3.76953e-07	1	1
COPS8	-5.96451	-1.96585	3.1002e-07	4.34638e-06	1	1
MRPL4	-5.96081	-1.96082	3.63677e-09	6.17662e-08	1	1
ABHD11	-5.9591	-2.12639	4.69925e-05	0.000509743	1	1
MED17	-5.94602	-2.22596	9.05202e-05	0.000944557	1	1
VPS54	-5.94528	-2.03399	2.2661e-05	0.00025789	1	1
ARMC5	-5.94297	-2.02545	2.09159e-05	0.000238639	1	1
BLM	-5.93953	-1.99124	1.26443e-05	0.000147184	1	1
COQ3	-5.93906	-1.93907	2.13339e-09	3.71531e-08	1	1
SLC20A1	-5.93839	-1.93839	1.01364e-12	2.35983e-11	1	1
ATP5C1	-5.93688	-2.03185	2.44419e-05	0.000276394	1	1
NARFL	-5.93542	-2.06501	3.4768e-05	0.0003832	1	1
SLX4	-5.93375	-1.9339	3.38384e-08	5.21106e-07	1	1
YLPM1	-5.93257	-1.93284	6.14757e-08	9.29064e-07	1	1
CEP55	-5.93108	-1.93191	1.90714e-07	2.71428e-06	1	1
RCL1	-5.9293	-2.39685	0.00019346	0.00194584	1	1
SLC38A2	-5.92095	-1.92096	3.98172e-09	6.74321e-08	1	1
NFIB	-5.91999	-1.92	2.22529e-09	3.86403e-08	1	1
UFL1	-5.91738	-1.91753	3.47e-08	5.32993e-07	1	1
MRTO4	-5.91512	-1.91519	1.7846e-08	2.83896e-07	1	1
TMEM242	-5.91098	-1.911	5.25533e-09	8.78335e-08	1	1
HEATR1	-5.91097	-1.91207	2.54004e-07	3.5751e-06	1	1
NDUFB10	-5.91044	-1.91044	1.49864e-09	2.64868e-08	1	1
ZC3H15	-5.90948	-1.90948	2.31104e-10	4.37039e-09	1	1
ATAD3C	-5.90732	-1.90916	4.25672e-07	5.86631e-06	1	1
EIF2AK4	-5.90592	-1.90603	2.55207e-08	3.9922e-07	1	1
PKN2	-5.90317	-1.90392	1.73342e-07	2.4909e-06	1	1
STT3A	-5.90142	-1.9201	4.39648e-06	5.33713e-05	1	1
CCNL1	-5.90136	-1.90144	1.82787e-08	2.90004e-07	1	1
DDB1	-5.90016	-1.95117	1.24632e-05	0.00014517	1	1
FAF2	-5.89708	-1.89709	2.7522e-09	4.72365e-08	1	1
CENPP	-5.89678	-1.89681	6.97589e-09	1.1508e-07	1	1
TMEM147	-5.89615	-1.89615	1.52576e-10	2.93832e-09	1	1
TUBD1	-5.8959	-1.89844	5.86162e-07	7.92496e-06	1	1
SFSWAP	-5.89213	-1.8937	3.62548e-07	5.04709e-06	1	1
PDSS2	-5.89137	-1.89138	1.67734e-09	2.947e-08	1	1
SMC3	-5.89119	-2.09406	5.95399e-05	0.000633518	1	1
PFDN2	-5.89115	-1.93315	1.01527e-05	0.000119428	1	1
PPP2CA	-5.88766	-2.11204	6.7643e-05	0.00071293	1	1
NOP9	-5.88543	-1.88546	6.37852e-09	1.05518e-07	1	1
PYROXD1	-5.88169	-2.18988	0.000103329	0.00106883	1	1
ATF7IP	-5.8815	-1.89503	3.16591e-06	3.95085e-05	1	1
TSC22D2	-5.87965	-1.89274	3.05976e-06	3.83988e-05	1	1
MIS18A	-5.8792	-1.8792	3.66355e-13	8.87663e-12	1	1
EXOC2	-5.87821	-1.99878	3.19971e-05	0.000355738	1	1
MTMR6	-5.87061	-1.87078	3.95823e-08	6.04342e-07	1	1
CSE1L	-5.87004	-2.05756	5.39982e-05	0.000578696	1	1
NOL6	-5.86838	-1.99756	3.46414e-05	0.000382277	1	1
YBEY	-5.86682	-1.86682	1.20517e-09	2.14276e-08	1	1
MAU2	-5.86294	-1.89508	7.68195e-06	9.16949e-05	1	1
RRAGA	-5.84836	-1.85639	1.86678e-06	2.38469e-05	1	1
NUP37	-5.84177	-1.84177	4.76416e-13	1.14193e-11	1	1
FUBP1	-5.84149	-1.85584	3.35902e-06	4.17431e-05	1	1
RPL36A	-5.83962	-2.16256	0.000110348	0.00113813	1	1
COQ5	-5.83952	-1.83954	2.99317e-09	5.11767e-08	1	1
AURKC	-5.83828	-2.17148	0.000115376	0.00118725	1	1
RAD51B	-5.83428	-1.83428	3.99353e-11	8.16398e-10	1	1
CASC3	-5.83179	-1.83179	1.19661e-10	2.33469e-09	1	1
LAMTOR1	-5.8304	-2.00306	4.88203e-05	0.000527644	1	1
BIRC2	-5.83	-1.94253	2.95751e-05	0.000330874	1	1
GMEB2	-5.8241	-1.8241	2.57658e-11	5.40566e-10	1	1
CRTC3	-5.8216	-1.82161	3.68908e-10	6.85284e-09	1	1
URB1	-5.82147	-1.82185	8.85198e-08	1.31438e-06	1	1
KANSL3	-5.82088	-2.14054	0.000108765	0.0011231	1	1
MRPL28	-5.81921	-2.05195	7.09008e-05	0.000746383	1	1
IPO13	-5.8186	-1.82149	6.67265e-07	8.96035e-06	1	1
ALDH18A1	-5.81801	-1.95039	3.56371e-05	0.000391971	1	1
MRPL15	-5.81644	-1.81656	2.62541e-08	4.09615e-07	1	1
MEN1	-5.811	-1.811	5.89854e-10	1.07665e-08	1	1
VCL	-5.80931	-1.81085	3.55181e-07	4.96001e-06	1	1
TIMM10	-5.80505	-1.85198	1.14101e-05	0.000133427	1	1
ACTR2	-5.80203	-1.97186	4.78531e-05	0.000517818	1	1
FBL	-5.79934	-1.9762	5.02669e-05	0.000542292	1	1
WDR48	-5.79711	-1.81855	5.06089e-06	6.11455e-05	1	1
CCNE1	-5.79502	-1.79502	4.61379e-10	8.4735e-09	1	1
PUS7	-5.79442	-1.79627	4.27052e-07	5.88078e-06	1	1
SETD1A	-5.79084	-1.79323	5.51174e-07	7.48027e-06	1	1
MCM10	-5.78999	-1.88031	2.31181e-05	0.000262705	1	1
RRP7A	-5.78943	-1.7902	1.7864e-07	2.55879e-06	1	1
PSMD8	-5.78632	-2.01128	6.78641e-05	0.000714838	1	1
PIK3R4	-5.78301	-1.78305	9.9437e-09	1.61352e-07	1	1
NUDT5	-5.78155	-1.79725	3.68156e-06	4.53406e-05	1	1
TRMT6	-5.78147	-1.78161	3.23581e-08	5.0047e-07	1	1
FBXL17	-5.78079	-1.7808	2.45773e-09	4.24697e-08	1	1
COX18	-5.78032	-1.78032	2.38571e-10	4.49729e-09	1	1
SPRTN	-5.77578	-1.95965	5.27133e-05	0.000566287	1	1
ORC5	-5.77215	-1.77257	9.78249e-08	1.44413e-06	1	1
NOL9	-5.76397	-1.76476	1.80234e-07	2.57955e-06	1	1
IWS1	-5.76321	-2.09045	0.000112444	0.00115841	1	1
CRNKL1	-5.76167	-1.76181	3.39129e-08	5.21353e-07	1	1
PSMC3	-5.75951	-1.76422	1.08929e-06	1.42938e-05	1	1
RFWD3	-5.7591	-1.77522	3.78294e-06	4.65249e-05	1	1
BCCIP	-5.75902	-1.76164	6.05887e-07	8.16894e-06	1	1
MRPL42	-5.75726	-1.87353	3.06989e-05	0.000342587	1	1
PSMA6	-5.75671	-1.96093	6.00383e-05	0.000638059	1	1
MFAP1	-5.75652	-1.94262	5.34972e-05	0.000574363	1	1
TAF1B	-5.75464	-1.82349	1.71782e-05	0.000198277	1	1
PYGO2	-5.75369	-1.75369	1.03968e-10	2.04192e-09	1	1
GNL3	-5.7534	-1.78986	8.75742e-06	0.000103699	1	1
NCAPD2	-5.74967	-1.85236	2.66735e-05	0.000300866	1	1
LCMT1	-5.74703	-1.74979	6.38371e-07	8.58527e-06	1	1
PFDN4	-5.74696	-1.92349	5.01539e-05	0.000541401	1	1
MBD2	-5.74156	-1.74311	3.57819e-07	4.98515e-06	1	1
SLC25A22	-5.74031	-1.74031	7.30962e-10	1.32877e-08	1	1
EXOSC10	-5.73603	-1.73686	1.90022e-07	2.7066e-06	1	1
SLC35B2	-5.73568	-1.74919	3.16011e-06	3.95085e-05	1	1
POLD1	-5.73522	-1.76614	7.38039e-06	8.83912e-05	1	1
NXT1	-5.7337	-1.89674	4.55599e-05	0.000495408	1	1
EFTUD2	-5.73329	-1.73387	1.33316e-07	1.93758e-06	1	1
NBAS	-5.72256	-1.72356	2.30264e-07	3.25387e-06	1	1
RRM1	-5.71774	-1.7178	1.45443e-08	2.33455e-07	0.910792	1
HDAC3	-5.71173	-1.72533	3.17998e-06	3.96563e-05	1	1
CASC5	-5.71128	-1.84081	3.47515e-05	0.0003832	1	1
CPSF3	-5.70736	-1.70739	7.7691e-09	1.27575e-07	1	1
COPS4	-5.70678	-2.24956	0.000248961	0.00246651	1	1
VPS41	-5.70073	-2.07642	0.000137516	0.00140293	1	1
UXT	-5.70068	-2.00563	0.000101814	0.00105561	1	1
USP7	-5.6965	-1.6975	2.30269e-07	3.25387e-06	1	1
GABPB1	-5.69535	-1.6966	2.89153e-07	4.06341e-06	1	1
DYNC1LI1	-5.69446	-1.69446	3.02437e-10	5.65342e-09	1	1
YAP1	-5.69442	-1.69442	9.68735e-10	1.73797e-08	1	1
PMVK	-5.69041	-1.69043	5.97533e-09	9.90317e-08	1	1
ATP6AP1	-5.68836	-1.8773	5.45051e-05	0.000583778	1	1
NRF1	-5.68482	-1.68509	6.11273e-08	9.24583e-07	1	1
NUP205	-5.68427	-1.68432	1.10541e-08	1.78235e-07	1	1
HSPD1	-5.68424	-1.68566	3.28678e-07	4.60072e-06	1	1
NDUFB8	-5.68342	-1.68384	9.57523e-08	1.41706e-06	1	1
ATP6AP2	-5.67754	-1.99063	0.000105635	0.00109205	1	1
TRRAP	-5.67576	-1.79411	3.13271e-05	0.000349161	1	1
DDRGK1	-5.67548	-1.67576	6.50355e-08	9.82031e-07	1	1
CD320	-5.6705	-1.67052	2.75478e-09	4.72365e-08	1	1
FECH	-5.65242	-1.65388	3.35784e-07	4.69649e-06	1	1
LARP7	-5.64652	-1.67862	7.67043e-06	9.16187e-05	1	1
PRPF3	-5.63973	-1.89571	8.02911e-05	0.000841264	1	1
FOXC1	-5.63804	-1.64131	7.56169e-07	1.01085e-05	1	1
SSBP3	-5.63665	-1.64405	1.71899e-06	2.19905e-05	1	1
GALE	-5.63238	-1.74939	3.09213e-05	0.000344853	1	1
COPB1	-5.62814	-1.86648	7.31153e-05	0.000768788	1	1
SNAPIN	-5.62711	-1.62879	3.87369e-07	5.37166e-06	1	1
C10orf2	-5.62627	-1.73726	2.91186e-05	0.000326586	0.12996	0.831855
GEMIN2	-5.6245	-1.71545	2.32975e-05	0.00026429	1	1
PRC1	-5.62327	-1.63435	2.58219e-06	3.26121e-05	1	1
FANCA	-5.61754	-1.70802	2.31642e-05	0.000262945	1	1
RNF41	-5.61602	-1.61603	2.65871e-09	4.57652e-08	1	1
MTX2	-5.6135	-1.61726	8.69042e-07	1.15138e-05	1	1
ADAT2	-5.61287	-1.89415	9.11123e-05	0.000949624	1	1
ICT1	-5.61257	-1.88153	8.57646e-05	0.000896506	1	1
TM2D2	-5.61013	-1.61057	1.00229e-07	1.47717e-06	1	1
ITGAV	-5.6088	-1.61232	8.13706e-07	1.0829e-05	1	1
NDUFAF5	-5.60455	-1.61655	2.80007e-06	3.52142e-05	1	1
TSEN34	-5.60375	-1.63719	8.00499e-06	9.54232e-05	1	1
EIF3L	-5.60338	-1.60588	5.77274e-07	7.81666e-06	1	1
NMT1	-5.60196	-1.83812	7.22476e-05	0.000760113	1	1
CAB39	-5.60183	-1.60446	6.06039e-07	8.16894e-06	1	1
CHCHD1	-5.59863	-1.60653	1.83508e-06	2.34587e-05	1	1
ATP13A1	-5.5972	-1.59736	3.65777e-08	5.60869e-07	1	1
PSMG1	-5.59584	-1.60566	2.28595e-06	2.90559e-05	1	1
E2F3	-5.59099	-1.60868	4.15806e-06	5.0823e-05	1	1
MAGT1	-5.58798	-1.594	1.39603e-06	1.80664e-05	1	1
NFYC	-5.5878	-1.83721	7.75883e-05	0.00081438	1	1
PRPF18	-5.58618	-1.59095	1.10431e-06	1.4459e-05	1	1
STIL	-5.58468	-1.58894	9.85356e-07	1.29873e-05	1	1
UBE3A	-5.57878	-1.5988	4.71771e-06	5.71542e-05	1	1
UBE2D3	-5.57744	-1.57941	4.54732e-07	6.2283e-06	1	1
RPS21	-5.57503	-1.65226	1.94623e-05	0.000223054	1	1
DDX42	-5.57333	-1.95933	0.000143222	0.00145864	1	1
FTO	-5.57232	-1.57308	1.74071e-07	2.49936e-06	1	1
HLCS	-5.56622	-1.57217	1.3793e-06	1.78628e-05	1	1
WDR59	-5.5545	-1.55452	4.00808e-09	6.77498e-08	1	1
EPB41L2	-5.55409	-1.57224	4.26865e-06	5.19965e-05	1	1
SHOC2	-5.55114	-1.56358	2.90599e-06	3.64948e-05	1	1
NGDN	-5.54932	-1.55339	9.41486e-07	1.24551e-05	1	1
PPAT	-5.54633	-1.73257	5.35447e-05	0.000574526	1	1
MPDU1	-5.5441	-1.54441	7.1326e-08	1.06977e-06	1	1
HECTD1	-5.54398	-1.54405	1.77898e-08	2.83256e-07	1	1
EAF1	-5.54261	-1.63659	2.41574e-05	0.000273697	1	1
ZFP91	-5.54097	-1.54256	3.68968e-07	5.12446e-06	1	1
EEF1A2	-5.54006	-1.72061	5.15469e-05	0.00055543	1	1
CEP85	-5.53665	-1.55688	4.76695e-06	5.76723e-05	1	1
SLC31A1	-5.53436	-1.73574	5.89936e-05	0.000628454	1	1
RABGGTB	-5.53205	-1.5338	4.03317e-07	5.57115e-06	1	1
NPEPPS	-5.52881	-1.53074	4.46546e-07	6.12087e-06	1	1
STAG1	-5.52413	-1.52539	2.91042e-07	4.08674e-06	1	1
TAF1D	-5.51355	-1.90153	0.00014433	0.00146825	1	1
FUS	-5.51271	-1.51333	1.42352e-07	2.06387e-06	1	1
GBF1	-5.51261	-1.81091	9.87498e-05	0.00102683	1	1
EIF2B1	-5.51175	-1.51259	1.92434e-07	2.73658e-06	1	1
STOML2	-5.50841	-1.52906	4.86963e-06	5.88747e-05	1	1
MOCS3	-5.50828	-1.8458	0.00011753	0.00120872	1	1
AUP1	-5.50807	-1.54089	7.85015e-06	9.364e-05	1	1
BOLA3	-5.50584	-1.71778	6.29071e-05	0.000666957	1	1
KCNK5	-5.50048	-1.50061	2.93389e-08	4.56148e-07	1	1
NSMCE1	-5.4999	-1.72287	6.70991e-05	0.000707616	1	1
VMA21	-5.49512	-1.53095	8.5988e-06	0.000101889	1	1
SNRPD3	-5.49291	-1.76936	8.89916e-05	0.00092915	1	1
PRKDC	-5.48996	-1.49929	2.17226e-06	2.76305e-05	1	1
VPS18	-5.48625	-1.70432	6.52208e-05	0.000689847	0.567579	1
EMC2	-5.48349	-1.80505	0.000109686	0.00113196	1	1
WDR20	-5.48147	-1.48563	9.61201e-07	1.26971e-05	1	1
ZNF598	-5.47612	-1.48228	1.42765e-06	1.84487e-05	1	1
CTPS1	-5.46978	-1.76846	9.89182e-05	0.00102738	1	1
DPM2	-5.46832	-1.46833	1.11398e-09	1.9826e-08	1	1
SLC25A1	-5.46574	-1.47303	1.6918e-06	2.16738e-05	1	1
EHMT1	-5.4626	-1.50584	1.04679e-05	0.000122731	1	1
WRAP53	-5.45244	-1.86873	0.000160789	0.00162825	1	1
ACLY	-5.44909	-1.81864	0.000134179	0.00137045	1	1
RBSN	-5.44661	-1.63358	5.38052e-05	0.000576975	1	1
C1orf109	-5.4452	-1.79446	0.000123492	0.00126638	1	1
UBE2H	-5.44461	-1.45289	1.9238e-06	2.45401e-05	1	1
RAB6A	-5.44249	-1.69836	8.02476e-05	0.000841264	1	1
IRF2BP1	-5.43574	-2.02046	0.00028435	0.00280001	1	1
WDR33	-5.42656	-1.94128	0.000227127	0.00226025	1	1
SIN3B	-5.4259	-1.42909	7.37805e-07	9.87784e-06	1	1
SLC39A10	-5.42512	-1.94164	0.000228494	0.00227258	1	1
DCP1A	-5.42409	-1.62468	5.8706e-05	0.000625765	1	1
ZBTB21	-5.42107	-1.42142	7.88765e-08	1.17707e-06	1	1
NSFL1C	-5.41707	-1.44805	7.39198e-06	8.84706e-05	1	1
PTBP1	-5.40724	-1.41131	9.42184e-07	1.24551e-05	1	1
NMNAT1	-5.40548	-1.4075	4.66574e-07	6.38068e-06	1	1
IRF2BP2	-5.40523	-1.4491	1.06287e-05	0.000124453	1	1
RAB1A	-5.40402	-1.40416	3.31515e-08	5.1141e-07	1	1
SRRM2	-5.39986	-1.59639	5.72272e-05	0.000611463	1	1
TAF6L	-5.39255	-1.84579	0.000183953	0.0018544	1	1
RFK	-5.39176	-1.79485	0.00015298	0.00155359	1	1
EIF3M	-5.38982	-1.52071	3.51732e-05	0.000387426	1	1
HSP90AB1	-5.38312	-1.38345	7.53842e-08	1.12779e-06	1	1
DSN1	-5.38044	-1.45901	1.98308e-05	0.000226985	1	1
PRPF39	-5.38036	-1.40414	5.62837e-06	6.77266e-05	1	1
TSSC1	-5.38031	-1.38359	7.59635e-07	1.01397e-05	1	1
TMCO6	-5.37413	-1.75392	0.00013977	0.00142511	1	1
YY1AP1	-5.37293	-1.93217	0.000262443	0.00259001	1	1
RNF40	-5.37102	-1.38724	3.80595e-06	4.67756e-05	1	1
KIF14	-5.36861	-1.38172	3.06498e-06	3.84373e-05	1	1
CCSAP	-5.36799	-1.36845	1.07381e-07	1.57606e-06	1	1
TCOF1	-5.36753	-1.372	1.03527e-06	1.3615e-05	1	1
EIF5	-5.36432	-1.77281	0.000156145	0.00158392	1	1
SCAF11	-5.3536	-1.35429	1.57966e-07	2.27361e-06	1	1
PABPC1	-5.35139	-1.65896	0.000103034	0.00106671	1	1
ZC3H7A	-5.34323	-1.43671	2.40185e-05	0.000272296	1	1
ABCD4	-5.33783	-1.48074	3.89659e-05	0.000426306	1	1
CLASP2	-5.33779	-1.84055	0.000218242	0.00217912	1	1
KLF5	-5.32683	-1.33261	1.33942e-06	1.73715e-05	1	1
PRDM10	-5.32357	-1.71056	0.000143775	0.00146344	1	1
DCAF7	-5.32318	-1.32823	1.17081e-06	1.52625e-05	1	1
NDST1	-5.32001	-1.32098	2.2372e-07	3.16886e-06	1	1
INO80	-5.31993	-1.46783	4.05736e-05	0.000443351	1	1
MRPS35	-5.31824	-1.74745	0.000168668	0.00170416	1	1
MIPEP	-5.31283	-1.53288	6.59765e-05	0.000697014	1	1
PGK1	-5.31067	-1.77205	0.000189319	0.00190526	1	1
ZCCHC7	-5.30761	-1.30997	5.45029e-07	7.40816e-06	1	1
FASN	-5.30478	-1.36064	1.37266e-05	0.00015947	1	1
ANAPC10	-5.30404	-1.78516	0.000202772	0.00203376	1	1
RTCB	-5.30241	-1.74625	0.000177869	0.0017951	1	1
FAM120A	-5.29888	-1.30134	5.69746e-07	7.72058e-06	1	1
ISL1	-5.29477	-1.33026	8.51368e-06	0.000101014	1	1
CCP110	-5.29126	-1.30966	4.32641e-06	5.26282e-05	1	1
MRPL49	-5.27197	-1.28936	4.08512e-06	4.99657e-05	1	1
METAP1	-5.2653	-1.67118	0.000154612	0.00156927	1	1
C20orf196	-5.2651	-1.28162	3.87716e-06	4.75852e-05	1	1
TFAP2A	-5.26483	-1.40465	3.79839e-05	0.000416073	1	1
ZFAT	-5.26372	-1.26419	1.07365e-07	1.57606e-06	1	1
HNRNPA0	-5.26088	-1.30062	9.58258e-06	0.000113095	1	1
WDR62	-5.26006	-1.2763	3.80961e-06	4.67884e-05	1	1
TBC1D20	-5.25773	-1.3082	1.23225e-05	0.000143626	1	1
ARF1	-5.25659	-1.63809	0.000140717	0.00143395	1	1
G6PD	-5.25576	-1.28487	6.93233e-06	8.31366e-05	1	1
ATMIN	-5.25566	-1.25804	5.50261e-07	7.47357e-06	1	1
NUP50	-5.25474	-1.2685	3.21939e-06	4.01198e-05	1	1
CCNE2	-5.25468	-1.29585	9.94269e-06	0.00011719	1	1
BRD7	-5.25272	-1.28729	8.28532e-06	9.85014e-05	1	1
SLC9A7	-5.25178	-1.66295	0.000157735	0.00159914	1	1
MRPL48	-5.24164	-1.39891	4.36372e-05	0.000475371	1	1
MBTPS1	-5.23792	-1.31796	2.02356e-05	0.00023147	1	1
COQ6	-5.23302	-1.63124	0.000150157	0.00152665	1	1
RNF31	-5.2272	-1.2766	1.20471e-05	0.000140507	1	1
PDSS1	-5.22517	-1.26209	8.87305e-06	0.000104999	1	1
UTP6	-5.22503	-1.23416	2.12524e-06	2.70516e-05	1	1
PPCDC	-5.21683	-1.30261	2.18371e-05	0.000248991	1	1
RMND1	-5.21411	-1.33921	3.33832e-05	0.000369766	1	1
METTL16	-5.20851	-1.67686	0.000194005	0.00195022	1	1
MALSU1	-5.20405	-1.34312	3.77427e-05	0.000413685	1	1
RAB7A	-5.20331	-1.20488	3.63487e-07	5.05621e-06	1	1
ILK	-5.20281	-1.30729	2.71981e-05	0.000306202	1	1
AKT2	-5.20255	-1.20821	1.30998e-06	1.70145e-05	1	1
GATAD1	-5.19561	-1.75351	0.000261327	0.00258185	1	1
RPIA	-5.19556	-1.34292	4.03971e-05	0.000441693	1	1
MRPL30	-5.19532	-1.40883	6.34963e-05	0.000672804	1	1
FAM98B	-5.19266	-1.80356	0.000308217	0.00302002	1	1
CLPB	-5.18984	-1.31164	3.2374e-05	0.000359481	1	1
RER1	-5.18763	-1.20218	3.40758e-06	4.23171e-05	1	1
ATP6V1E1	-5.18302	-1.55023	0.000132924	0.00135998	1	1
DCTD	-5.18047	-1.19882	4.31656e-06	5.25441e-05	1	1
NOL11	-5.17691	-1.1777	1.83332e-07	2.61759e-06	1	1
KIAA1551	-5.17515	-1.34643	4.83497e-05	0.000522875	1	1
MBD3	-5.17115	-1.26151	2.31283e-05	0.000262705	1	1
CDT1	-5.16593	-1.67832	0.000225381	0.00224538	1	1
ZNF148	-5.16136	-1.16192	1.29964e-07	1.89195e-06	1	1
BECN1	-5.15934	-1.55916	0.000151079	0.00153516	0.0347202	0.526054
SURF4	-5.15324	-1.15981	1.52376e-06	1.96196e-05	1	1
GNL2	-5.14783	-1.26634	3.13728e-05	0.000349451	1	1
DNLZ	-5.14763	-1.3625	6.40127e-05	0.000677873	1	1
TUBA1C	-5.14668	-1.34817	5.9035e-05	0.00062852	1	1
GLRX3	-5.14666	-1.31157	4.61892e-05	0.000501335	1	1
PPP6C	-5.14331	-1.96081	0.000556904	0.00530233	1	1
RAPGEF1	-5.14163	-1.31061	4.75631e-05	0.000514993	1	1
XRCC2	-5.14101	-1.55775	0.000161063	0.0016301	1	1
MGEA5	-5.1382	-1.14103	6.54361e-07	8.79368e-06	1	1
SRP68	-5.13517	-1.29978	4.60867e-05	0.000500831	1	1
SDHB	-5.13438	-1.5024	0.000133357	0.00136362	1	1
NDUFC1	-5.12782	-1.80753	0.000378316	0.00366458	1	1
GPAT4	-5.12766	-1.1335	1.35476e-06	1.75577e-05	1	1
VARS	-5.12597	-1.32647	5.86736e-05	0.000625765	1	1
SP2	-5.12167	-1.2301	2.83578e-05	0.000318654	1	1
MMD	-5.11747	-1.13757	4.73791e-06	5.73599e-05	1	1
FBXO42	-5.11342	-1.41186	9.88094e-05	0.00102685	1	1
VPS39	-5.11189	-1.15436	1.02713e-05	0.000120744	0.167782	0.91775
CAPRIN1	-5.10781	-1.60367	0.000213223	0.00213258	1	1
REXO1	-5.10753	-1.74785	0.000336839	0.00328962	1	1
FOXM1	-5.10662	-1.15273	1.12028e-05	0.000131089	1	1
FOXRED1	-5.10495	-1.2697	4.61335e-05	0.000501034	1	1
AMDHD2	-5.10479	-1.10545	1.52112e-07	2.19113e-06	1	1
EWSR1	-5.10387	-1.45408	0.000123979	0.00127064	1	1
COG6	-5.10152	-1.1025	2.25489e-07	3.19138e-06	1	1
PPM1D	-5.10057	-1.10882	1.91642e-06	2.44636e-05	1	1
ANKRD49	-5.09377	-1.28364	5.48355e-05	0.000586964	1	1
ZC3H8	-5.08825	-1.90476	0.000555405	0.00529089	1	1
PRMT7	-5.0852	-1.09007	1.12712e-06	1.47145e-05	1	1
SLC35A2	-5.0846	-1.19585	2.91966e-05	0.00032705	1	1
SLC30A1	-5.08347	-1.15479	1.78469e-05	0.000205199	1	1
GATA2	-5.08005	-1.12115	9.92626e-06	0.000117073	1	1
ANKRD52	-5.07977	-1.1909	2.91623e-05	0.000326871	1	1
SNRPB2	-5.07626	-1.19714	3.20933e-05	0.000356586	1	1
CNPY2	-5.07034	-1.3349	8.38918e-05	0.000877444	1	1
ABCF2	-5.07001	-1.08354	3.16396e-06	3.95085e-05	1	1
FNDC3B	-5.06356	-1.17684	2.97991e-05	0.000332962	1	1
AXIN1	-5.06293	-1.09097	6.66751e-06	8.00146e-05	1	1
THAP11	-5.05624	-1.33195	8.86746e-05	0.000926383	1	1
ADAR	-5.05059	-1.74092	0.000390152	0.003769	1	1
DIMT1	-5.0489	-1.69702	0.000344753	0.00335638	1	1
MIS18BP1	-5.04857	-1.84568	0.000526779	0.00502894	1	1
ATP5B	-5.04497	-1.68658	0.00033813	0.00330042	1	1
ZNF592	-5.0349	-1.14867	2.99499e-05	0.000334438	1	1
RTEL1	-5.03363	-1.21446	5.1645e-05	0.000556151	1	1
UNC50	-5.03137	-1.31181	9.07389e-05	0.000946285	1	1
MSL2	-5.03071	-1.06514	8.25058e-06	9.82056e-05	1	1
WRAP73	-5.02979	-1.0406	2.5188e-06	3.19018e-05	1	1
TUBGCP3	-5.02496	-1.44347	0.000162125	0.00163992	1	1
FANCD2	-5.01586	-1.19686	5.17041e-05	0.000556451	1	1
TEX10	-5.01299	-1.23056	6.50305e-05	0.000688243	1	1
LSM2	-5.01243	-1.37207	0.000128898	0.0013203	1	1
GOLGA2	-4.99463	-1.08235	2.23834e-05	0.000255056	1	1
PBRM1	-4.99124	-1.02644	8.44448e-06	0.000100314	1	1
SLC30A9	-4.98757	-1.18343	5.69843e-05	0.000609233	1	1
SLC12A7	-4.98442	-1.00283	4.33118e-06	5.26503e-05	1	1
C1orf27	-4.98085	-1.12202	3.84108e-05	0.000420491	1	1
SGK1	-4.97903	-1.13171	4.2129e-05	0.000459221	1	1
AP1M1	-4.97775	-1.04467	1.66611e-05	0.000192559	1	1
C1QBP	-4.97191	-1.44601	0.00019792	0.00198846	1	1
APEX1	-4.96975	-1.04776	1.96762e-05	0.00022536	1	1
CDCA3	-4.96951	-1.57162	0.000300044	0.00294317	1	1
MORF4L2	-4.96922	-1.03564	1.65254e-05	0.000191237	1	1
PDS5B	-4.9656	-1.06798	2.6584e-05	0.000300046	1	1
EPC1	-4.9647	-1.09134	3.38561e-05	0.000374771	1	1
VKORC1L1	-4.95959	-1.09424	3.63477e-05	0.000399376	1	1
EXOSC8	-4.95526	-1.99489	0.000995556	0.00922273	1	1
NUF2	-4.95413	-1.10511	4.15756e-05	0.000453908	1	1
PRIM1	-4.94958	-1.40377	0.000184569	0.00185956	1	1
COPG1	-4.93991	-1.53801	0.000296364	0.00291027	1	1
ALYREF	-4.93769	-1.88004	0.000775692	0.00726519	1	1
RBM17	-4.93595	-1.52152	0.000285099	0.00280583	1	1
RMI2	-4.93454	-1.51201	0.000277975	0.00274026	1	1
APEX2	-4.9293	-1.11169	5.21915e-05	0.000561019	1	1
TADA2B	-4.92466	-1.42929	0.000219622	0.00219167	1	1
KAT2A	-4.91933	-1.0711	4.18314e-05	0.000456256	1	1
NGRN	-4.91665	-1.64422	0.000434041	0.00418392	1	1
SRF	-4.91244	-1.2754	0.000130653	0.00133751	1	1
OLA1	-4.90072	-1.03656	3.67237e-05	0.000403011	1	1
LRR1	-4.90048	-1.16399	8.34454e-05	0.000873288	1	1
PINX1	-4.89905	-1.23811	0.000118303	0.00121527	1	1
B4GALT7	-4.88976	-1.13746	7.68876e-05	0.000807501	1	1
ATP1B3	-4.87952	-0.893297	3.22386e-06	4.01474e-05	1	1
ALG5	-4.87601	-1.4915	0.000312557	0.00306086	1	1
SPIN1	-4.8758	-1.04463	4.75145e-05	0.000514779	1	1
RPN1	-4.87274	-1.46183	0.00028823	0.00283352	1	1
ATM	-4.87043	-1.00691	3.69215e-05	0.000404933	1	1
TMEM30A	-4.86508	-1.06186	5.73199e-05	0.000612087	1	1
HIPK1	-4.85694	-1.15674	9.94326e-05	0.00103152	1	1
ZNF236	-4.8494	-1.40804	0.00026194	0.00258648	1	1
C12orf45	-4.8489	-1.29963	0.000182318	0.00183896	1	1
SFXN4	-4.84054	-1.009	4.73869e-05	0.000513708	1	1
COPZ1	-4.8372	-1.58806	0.000463465	0.00445311	1	1
USF2	-4.83107	-0.962993	3.54957e-05	0.000390738	1	1
PDAP1	-4.82604	-1.68857	0.000628669	0.00593806	1	1
UQCRC2	-4.82564	-1.38775	0.000264848	0.0026123	1	1
ATP5L2	-4.8237	-1.63715	0.000550811	0.00525273	1	1
RABIF	-4.82256	-1.07681	7.9578e-05	0.000834773	1	1
TTC37	-4.81853	-1.16548	0.000122306	0.00125493	1	1
MGA	-4.81099	-0.962027	4.15907e-05	0.000453908	1	1
RBM33	-4.81041	-1.54098	0.000437737	0.00421727	1	1
TRAPPC12	-4.80555	-1.60101	0.000524396	0.00500887	1	1
MIA3	-4.80371	-0.91277	2.85468e-05	0.000320576	1	1
NSMCE2	-4.79791	-1.32676	0.000237945	0.00236262	1	1
GTF3C3	-4.79777	-1.34381	0.000251595	0.00249122	1	1
LEMD2	-4.79612	-1.14	0.000120739	0.00123957	1	1
SBNO1	-4.79472	-1.61262	0.000557503	0.0053052	1	1
SRP9	-4.78779	-1.32287	0.000242837	0.00240851	1	1
PPA2	-4.78545	-1.60069	0.000553489	0.00527545	1	1
LDLR	-4.78147	-0.903828	3.25418e-05	0.000360894	1	1
NDUFS5	-4.78094	-1.44747	0.000364011	0.0035337	1	1
NDUFB3	-4.77844	-0.982005	5.97943e-05	0.000635845	1	1
SEL1L	-4.77737	-1.1892	0.000158129	0.00160223	1	1
MTA2	-4.7754	-1.1477	0.000135669	0.00138488	1	1
WDR24	-4.77253	-1.43859	0.000363518	0.00353084	1	1
ZNRD1	-4.76909	-1.25398	0.000205417	0.00205798	1	1
CENPJ	-4.76173	-1.4602	0.000399432	0.00385656	1	1
PRKRIP1	-4.75305	-1.38203	0.000325575	0.00318485	1	1
TMEM161B	-4.745	-0.990679	7.60655e-05	0.000799338	1	1
HSPA8	-4.74168	-1.28339	0.000248108	0.00245943	1	1
BRCA2	-4.73855	-1.62085	0.000662608	0.0062388	1	1
B3GALT6	-4.73767	-0.914747	5.03392e-05	0.000542744	1	1
DUS2	-4.73763	-0.850289	2.96175e-05	0.00033114	1	1
PFN1	-4.73729	-1.4262	0.000388547	0.00375553	1	1
MTF1	-4.72882	-1.05206	0.00011049	0.00113894	1	1
PAM16	-4.71784	-1.40189	0.000383112	0.00370701	1	1
TOMM7	-4.71661	-0.889946	4.90524e-05	0.000529831	1	1
RPS25	-4.70783	-0.739916	7.66684e-06	9.16187e-05	1	1
SURF1	-4.70734	-1.03907	0.000114647	0.00118043	1	1
MRPS28	-4.70232	-1.0407	0.000117964	0.00121248	1	1
POLA1	-4.6917	-1.53138	0.000591333	0.00560321	1	1
UVRAG	-4.68038	-0.980139	9.94153e-05	0.00103152	1	1
HSD17B10	-4.66088	-1.27109	0.000307582	0.00301545	1	1
WDR4	-4.64868	-0.743557	2.44153e-05	0.000276268	1	1
RBBP5	-4.64579	-1.62414	0.000851365	0.00793643	1	1
DDX11	-4.62526	-1.21811	0.000291609	0.00286516	1	1
PPIE	-4.62394	-1.48604	0.000627943	0.00593749	1	1
MTG1	-4.61133	-1.31543	0.000405947	0.00391734	1	1
DDA1	-4.61043	-0.899467	9.45514e-05	0.000984317	1	1
PRELID1	-4.59293	-0.85501	8.2844e-05	0.000867502	1	1
ACTG1	-4.58332	-1.07664	0.000211403	0.00211557	1	1
EIF2S1	-4.58279	-1.31716	0.000442467	0.00426054	1	1
UQCRFS1	-4.56018	-1.42067	0.000625242	0.00591508	1	1
PSMA3	-4.55953	-1.01639	0.000186327	0.00187621	1	1
RWDD1	-4.55814	-0.850847	9.62017e-05	0.00100091	1	1
EIF3E	-4.55353	-1.42178	0.000638324	0.00602287	1	1
COPS2	-4.54675	-1.26418	0.000421719	0.00406734	1	1
FAM210A	-4.54574	-1.03812	0.000210725	0.00210997	1	1
ESF1	-4.54559	-1.0245	0.000201239	0.00201953	1	1
INTS12	-4.54077	-1.13996	0.000297369	0.00291854	1	1
CELF1	-4.53982	-1.16836	0.000325142	0.00318236	1	1
RTF1	-4.52449	-1.46394	0.000769868	0.00721443	1	1
NDUFAF6	-4.51124	-1.04557	0.000242237	0.00240391	1	1
UBQLN1	-4.50615	-0.825437	0.000108585	0.0011219	1	1
MRPL27	-4.49978	-1.2637	0.000480652	0.00461079	1	1
POLD2	-4.49908	-1.59561	0.00114892	0.010583	1	1
AKAP8L	-4.49399	-0.925656	0.000170191	0.00171858	1	1
KMT2B	-4.48289	-1.00145	0.000230032	0.0022866	1	1
POT1	-4.47289	-1.38878	0.000723935	0.00679828	1	1
ECD	-4.46753	-1.1096	0.000338604	0.00330324	1	1
NUP107	-4.4654	-1.56624	0.00116135	0.0106754	1	1
METAP2	-4.4653	-1.12503	0.000356803	0.0034675	1	1
DRG1	-4.46243	-1.26968	0.000541568	0.00516735	1	1
DLD	-4.44066	-1.08883	0.000344804	0.00335638	1	1
RAF1	-4.40773	-0.890123	0.000203663	0.00204155	1	1
INTS2	-4.40324	-1.22773	0.000567557	0.005398	1	1
SMG8	-4.40067	-1.17985	0.00050142	0.00479969	1	1
PIGB	-4.39132	-0.816371	0.000166106	0.00167924	1	1
TFAP4	-4.38869	-1.03539	0.000343309	0.00334548	0.405578	1
DICER1	-4.38675	-1.31713	0.000751884	0.00704961	1	1
ACTR8	-4.38155	-1.39396	0.000928987	0.00862845	1	1
UBE2Q1	-4.36244	-0.838928	0.000199562	0.00200382	1	1
ATP5I	-4.35332	-1.24595	0.000680959	0.0064082	1	1
KDM1A	-4.35231	-1.13395	0.000504833	0.00482977	1	1
BAZ1B	-4.3493	-1.12329	0.000494275	0.00473639	1	1
ERO1A	-4.3398	-0.863739	0.000234145	0.00232619	1	1
NCBP1	-4.33422	-0.888368	0.00025822	0.00255257	1	1
GTPBP8	-4.33041	-1.37305	0.00100318	0.0092885	1	1
DCP2	-4.32865	-1.0757	0.000458543	0.00440819	1	1
MRPS27	-4.32689	-1.29024	0.000819068	0.00764735	1	1
SCAF1	-4.32495	-0.873667	0.000253767	0.00250994	1	1
ILF3	-4.32442	-1.01177	0.000386799	0.00374066	1	1
ANKLE2	-4.31675	-1.07889	0.000478281	0.00459299	0.31583	1
CHCHD4	-4.31625	-1.30176	0.000867191	0.00807552	1	1
TECR	-4.30618	-0.816523	0.000223852	0.00223139	1	1
NARS	-4.30248	-0.979636	0.000375501	0.0036393	1	1
NDUFS3	-4.30216	-1.14133	0.00059051	0.00560014	1	1
LIG1	-4.29273	-1.52135	0.00159287	0.0144779	1	1
RPL36	-4.28909	-1.57882	0.00184861	0.0166749	0.723337	1
PSMF1	-4.27908	-1.14148	0.00062845	0.00593806	1	1
ETF1	-4.26563	-1.10492	0.000590695	0.00560014	1	1
SCAF4	-4.26439	-0.763089	0.00021528	0.00215196	1	1
MED10	-4.24358	-0.889414	0.000342419	0.00333863	1	1
GCLC	-4.23431	-0.746969	0.000225577	0.00224607	1	1
PHF8	-4.23364	-0.870788	0.000333663	0.00326039	1	1
LMAN2	-4.23226	-0.73454	0.000217895	0.00217687	1	1
PPP2R4	-4.22956	-0.899076	0.000367212	0.00356283	1	1
PHF23	-4.22099	-1.19573	0.00084349	0.00786713	1	1
MAPK1	-4.21944	-1.05708	0.00058807	0.00558714	1	1
PRPF40A	-4.21355	-0.95862	0.000455993	0.00438604	1	1
ADNP	-4.21322	-0.799945	0.000286121	0.00281434	1	1
SLC29A4	-4.21064	-1.38419	0.00139122	0.0127229	1	1
AAGAB	-4.21023	-1.3364	0.00123714	0.0113429	1	1
GGNBP2	-4.2051	-0.997693	0.000520284	0.00497226	1	1
ARL2	-4.19422	-1.58883	0.00238091	0.0210818	1	1
SLIRP	-4.19223	-1.2144	0.000952363	0.00883637	1	1
GMEB1	-4.18843	-0.768638	0.000280371	0.00276235	1	1
PDCL	-4.18443	-1.55035	0.00222232	0.0197956	1	1
MOGS	-4.18253	-1.05614	0.00064749	0.00609968	1	1
RBM4	-4.18162	-1.10289	0.000734204	0.00689108	1	1
ATP6V0E1	-4.16871	-1.13979	0.000835574	0.00779738	1	1
SPAG7	-4.1652	-0.675053	0.000223482	0.00222894	1	1
SCAI	-4.16271	-1.10856	0.000782782	0.0073239	1	1
NFATC2IP	-4.15575	-0.994955	0.000590563	0.00560014	1	1
C19orf43	-4.15258	-0.891271	0.000447882	0.00431035	1	1
GTF2B	-4.14966	-0.821858	0.000370109	0.00358899	1	1
SPEN	-4.14654	-1.0123	0.000634111	0.00598629	1	1
CDC37	-4.14446	-1.04234	0.000690456	0.00649415	1	1
KRR1	-4.13129	-1.72651	0.00383754	0.0329965	1	1
DAXX	-4.12276	-0.754876	0.000328661	0.00321327	1	1
KDM3B	-4.11928	-0.76776	0.000345125	0.00335767	1	1
FARS2	-4.11904	-1.20147	0.00110903	0.0102367	1	1
N4BP2	-4.10842	-0.767308	0.000355925	0.00346085	1	1
NDUFA2	-4.10445	-1.15778	0.00103065	0.00953295	1	1
DBF4	-4.1027	-0.877856	0.000495877	0.00474919	1	1
UBA6	-4.0709	-0.834719	0.000480521	0.00461079	1	1
CCNF	-4.06914	-1.29648	0.00158791	0.0144475	1	1
CS	-4.06614	-1.01167	0.000782107	0.00732143	1	1
SLU7	-4.06174	-0.963473	0.000697504	0.00655697	1	1
CTU1	-4.05593	-1.18697	0.00125218	0.0114748	1	1
STAT4	-4.04651	-0.594032	0.000252794	0.00250171	1	1
CTDSPL2	-4.04595	-1.11493	0.00107214	0.00990643	1	1
ALG14	-4.01012	-1.09355	0.00111179	0.0102569	1	1
ATAD3B	-3.98923	-1.10006	0.00119073	0.0109342	1	1
COQ2	-3.98099	-1.30404	0.00200405	0.017977	1	1
RPL27A	-3.97901	-0.979804	0.000901841	0.00838505	0.856472	1
ZNHIT3	-3.97565	-1.29859	0.00200348	0.017977	1	1
GNB2	-3.96115	-0.832014	0.000642785	0.00605856	1	1
ATRX	-3.96114	-0.886398	0.000741903	0.00695968	0.74556	1
AGO2	-3.96027	-1.03817	0.00109647	0.010126	1	1
VDAC1	-3.95782	-0.994738	0.00098872	0.00916892	1	1
BRK1	-3.95565	-0.825965	0.000641855	0.00605298	1	1
SMS	-3.95541	-1.31158	0.00217073	0.0193844	1	1
WBSCR22	-3.95392	-1.16237	0.00151606	0.0138291	1	1
ZSWIM8	-3.9532	-0.962539	0.000921745	0.00856564	1	1
PUM1	-3.94824	-1.00886	0.0010498	0.00970512	1	1
MED4	-3.93962	-1.03221	0.00113762	0.0104843	1	1
UXS1	-3.93588	-1.03522	0.00115703	0.0106467	1	1
TOX4	-3.91984	-0.866412	0.000784241	0.0073337	1	1
HADHA	-3.90521	-0.68942	0.000508435	0.00486162	1	1
ARHGAP1	-3.90284	-0.951009	0.00101731	0.00941445	1	1
PET117	-3.90267	-0.756989	0.000615021	0.00582148	1	1
SNUPN	-3.89789	-0.670013	0.000491727	0.0047145	1	1
GTPBP10	-3.89419	-1.45527	0.00353982	0.0306584	1	1
BRD4	-3.8903	-0.843808	0.000798472	0.00746287	0.48184	1
GATAD2B	-3.86573	-1.06909	0.00149718	0.0136639	1	1
MRPL35	-3.85022	-1.30251	0.00273332	0.0239996	1	1
POLR3C	-3.84177	-1.06825	0.00158452	0.014424	1	1
EXT1	-3.83784	-0.955165	0.00121015	0.0111069	1	1
FAAP24	-3.83456	-1.14513	0.00194441	0.0174771	1	1
CRIPT	-3.83195	-1.00205	0.00137942	0.0126215	1	1
CCNC	-3.82062	-0.73538	0.000721784	0.00678165	1	1
TMEM11	-3.80827	-0.999113	0.00145182	0.0132567	0.477533	1
EIF4A3	-3.80684	-0.644891	0.000588739	0.00559051	0.394383	1
WDR7	-3.79833	-0.819641	0.000950299	0.0088218	0.0703415	0.662967
NUP214	-3.79374	-1.33712	0.00339445	0.0294566	1	1
CENPL	-3.76969	-0.809025	0.00099479	0.00922042	1	1
NCAPG2	-3.76528	-1.11458	0.00213512	0.0190855	1	1
COX5B	-3.76321	-1.00852	0.00165919	0.0150195	1	1
CACFD1	-3.74456	-1.1119	0.00222987	0.0198529	1	1
RAD23B	-3.7399	-1.17515	0.0026243	0.0230651	1	1
ZCRB1	-3.72761	-0.578534	0.000609454	0.00577185	1	1
SBDS	-3.72592	-1.09117	0.00221871	0.0197732	1	1
PIGW	-3.72412	-0.708189	0.00086398	0.00804982	1	1
DDX19A	-3.72226	-0.897822	0.00139819	0.0127801	1	1
ATP2B1	-3.72151	-1.20915	0.00297354	0.026032	1	1
MED25	-3.71773	-0.547758	0.000576134	0.00547666	1	1
PDCD5	-3.71549	-1.14132	0.00256582	0.0225846	1	1
TBX3	-3.71404	-0.70914	0.000888781	0.00826793	1	1
HSPA4	-3.70033	-0.686431	0.000868502	0.00808351	1	1
TTC14	-3.6989	-1.04714	0.00212971	0.0190467	1	1
PPP1R8	-3.69419	-0.85291	0.0013412	0.012278	1	1
PAICS	-3.6932	-0.939286	0.00166234	0.0150404	1	1
PAK1IP1	-3.6889	-1.10113	0.00248362	0.021926	1	1
ALG13	-3.68771	-0.91355	0.00158205	0.0144089	1	1
TBC1D5	-3.68541	-0.640811	0.000802405	0.0074957	1	1
POMP	-3.67738	-1.0095	0.00204844	0.0183382	1	1
C2orf49	-3.67657	-1.23834	0.00354561	0.0306937	1	1
GPATCH11	-3.67529	-0.962651	0.00183803	0.0165879	1	1
C1orf74	-3.66661	-0.957758	0.00185499	0.016724	1	1
CTDP1	-3.66607	-1.48562	0.00650017	0.0542177	1	1
TRAM2	-3.66424	-0.764688	0.00116023	0.0106706	1	1
HFM1	-3.65902	-0.341631	0.000381515	0.00369357	1	1
KIAA0907	-3.64345	-0.862106	0.00155446	0.0141649	1	1
RHOT2	-3.64267	-1.0051	0.00220369	0.0196689	1	1
PRMT9	-3.641	-0.828109	0.00143853	0.0131421	1	1
ASB7	-3.63794	-0.788113	0.00131309	0.0120268	1	1
UGP2	-3.63504	-1.16391	0.00327965	0.0284881	1	1
RPA1	-3.63343	-0.986902	0.0021567	0.0192688	1	1
SKA2	-3.62878	-1.03824	0.00246721	0.0218026	1	1
AVEN	-3.6136	-0.929503	0.00196969	0.0176865	1	1
ZNF668	-3.60705	-0.710784	0.00116979	0.0107475	1	1
DNTTIP1	-3.60513	-1.23276	0.00414263	0.0355342	1	1
RREB1	-3.60275	-1.10256	0.00306092	0.0267183	1	1
GEMIN8	-3.60159	-1.27982	0.00466682	0.0397817	1	1
DDX1	-3.59862	-0.718783	0.00121876	0.0111801	1	1
MYCL	-3.57745	-1.08009	0.00308153	0.026885	1	1
RPRD1B	-3.57282	-0.806404	0.00161232	0.0146323	1	1
TMEM199	-3.57276	-1.07929	0.00311016	0.0270907	1	1
HBS1L	-3.57229	-0.866321	0.00186802	0.0168245	1	1
GNB4	-3.57207	-0.67107	0.00115603	0.010643	0.969267	1
UBE3C	-3.56594	-0.869939	0.00191373	0.0172101	1	1
VPS33A	-3.55611	-0.961333	0.00244228	0.0216038	0.505504	1
[truncated: 15,834 more rows]

## Sheet: K562_MOI=3
Gene	Fitness Score	ZLFC	RRA_depletion	RRA_depletion_FDR	RRA_enrichment	RRA_enrichment_FDR
NFS1	-7.6451	-3.6451	3.265e-32	2.91124e-28	1	1
PDE12	-7.60102	-3.60102	2.00378e-30	8.93335e-27	1	1
ZFC3H1	-7.54171	-3.54171	1.06326e-26	2.37014e-23	1	1
ZNHIT2	-7.52122	-3.52122	5.28222e-24	8.56344e-21	1	1
HSD17B12	-7.49296	-3.49296	9.21851e-33	1.64394e-28	1	1
SF3B4	-7.42594	-3.42594	2.60002e-31	1.54554e-27	1	1
LIPT2	-7.41265	-3.41265	3.57471e-27	9.10684e-24	1	1
PELO	-7.38453	-3.38453	7.65765e-29	2.27598e-25	1	1
DDX24	-7.37655	-3.37655	7.23657e-26	1.43389e-22	1	1
SMC4	-7.3365	-3.3365	1.95542e-29	6.9742e-26	1	1
EIF2B2	-7.29286	-3.29286	5.49415e-23	7.5367e-20	1	1
TWISTNB	-7.2763	-3.2763	1.23219e-21	1.15651e-18	1	1
TRAPPC1	-7.24985	-3.24985	1.40882e-20	1.04681e-17	1	1
HEXIM1	-7.18078	-3.18078	1.84156e-21	1.56383e-18	1	1
RNF113A	-7.17722	-3.17722	2.05366e-22	2.44153e-19	1	1
RUVBL1	-7.14836	-3.14836	1.53381e-22	1.95375e-19	1	1
YAE1D1	-7.14214	-3.14214	1.74814e-18	7.99348e-16	1	1
PPCS	-7.14169	-3.14169	8.87406e-18	3.2969e-15	1	1
UHRF1	-7.12407	-3.12407	7.53342e-22	7.46353e-19	1	1
EIF3G	-7.11666	-3.11666	2.558e-20	1.82467e-17	1	1
NDUFB4	-7.09929	-3.09929	2.213e-19	1.36084e-16	1	1
MED11	-7.00084	-3.00084	2.99735e-18	1.21481e-15	1	1
BCR	-6.97366	-2.97366	3.82954e-19	2.13413e-16	1	1
YARS2	-6.91393	-2.91393	1.9518e-18	8.70162e-16	1	1
CDC16	-6.90637	-2.90637	1.90341e-15	4.64981e-13	1	1
GINS2	-6.89295	-2.89295	7.98135e-17	2.37219e-14	1	1
SRSF1	-6.87165	-2.87165	1.07687e-14	2.34193e-12	1	1
PSMB5	-6.86272	-2.86272	5.79752e-16	1.56647e-13	1	1
TRIAP1	-6.84774	-2.84774	4.46574e-16	1.22519e-13	1	1
PHB2	-6.84773	-2.84773	2.88235e-22	3.21256e-19	1	1
CDC73	-6.81416	-2.81416	1.17646e-16	3.43931e-14	1	1
COX11	-6.80569	-2.80569	9.82914e-15	2.16399e-12	1	1
ISCA2	-6.80528	-2.80528	2.25534e-16	6.38404e-14	1	1
TRNAU1AP	-6.79698	-2.79698	1.1222e-17	4.08413e-15	1	1
SNAPC2	-6.7939	-2.7939	2.73615e-24	4.87938e-21	1	1
TUBG1	-6.79259	-2.79259	7.6391e-19	3.68184e-16	1	1
WDR83	-6.77998	-2.77998	7.05498e-19	3.49476e-16	1	1
TXNL4A	-6.76832	-2.76832	1.13924e-20	8.83306e-18	1	1
METTL17	-6.7669	-2.7669	8.92371e-19	4.1878e-16	1	1
MRPS26	-6.75515	-2.75515	1.51294e-21	1.34902e-18	1	1
PSMC2	-6.73715	-2.73715	6.2475e-19	3.18319e-16	1	1
MRPS18C	-6.73315	-2.73315	8.98375e-20	5.9336e-17	1	1
AFG3L2	-6.72146	-2.72146	7.66544e-21	6.21353e-18	1	1
RBFA	-6.72143	-2.72143	1.00606e-15	2.60015e-13	1	1
POLR3D	-6.7092	-2.7092	4.27443e-20	2.93176e-17	1	1
AHCYL1	-6.69538	-2.69538	5.66876e-17	1.77353e-14	1	1
SARS	-6.68989	-2.68989	3.001e-19	1.78389e-16	1	1
SF3B2	-6.6881	-2.6881	7.11655e-17	2.15101e-14	1	1
CIAO1	-6.68256	-2.68256	2.53502e-18	1.10261e-15	1	1
MRPL33	-6.67461	-2.67461	3.40456e-23	5.05946e-20	1	1
WDR77	-6.67355	-2.67355	3.82804e-19	2.13413e-16	1	1
XPO1	-6.66886	-2.66886	1.74502e-14	3.74926e-12	1	1
DHX35	-6.65289	-2.65289	2.19803e-14	4.61147e-12	1	1
SART3	-6.64982	-2.64982	1.19315e-15	3.03964e-13	1	1
GRWD1	-6.64824	-2.64824	2.79469e-14	5.79508e-12	1	1
SCO1	-6.63937	-2.63937	6.91483e-18	2.62366e-15	1	1
PDCD7	-6.63858	-2.63858	2.47223e-12	3.64358e-10	1	1
EXOSC4	-6.6378	-2.6378	2.99351e-18	1.21481e-15	1	1
MAX	-6.63286	-2.63286	7.46188e-22	7.46353e-19	1	1
MEPCE	-6.63168	-2.63168	2.65109e-18	1.12564e-15	1	1
CYC1	-6.61937	-2.61937	9.28534e-15	2.09487e-12	1	1
MCM5	-6.60328	-2.60328	5.49986e-19	2.97209e-16	1	1
HSPA9	-6.59769	-2.59769	3.37607e-15	7.92176e-13	1	1
MYC	-6.55872	-2.55872	1.79406e-11	2.14721e-09	1	1
TRMT112	-6.55659	-2.55659	5.84987e-19	3.06826e-16	1	1
MRPL34	-6.53581	-2.53581	2.91381e-17	9.80416e-15	1	1
CLNS1A	-6.53313	-2.53313	4.57849e-18	1.77496e-15	1	1
RPS19	-6.52822	-2.52822	5.80753e-17	1.78561e-14	1	1
SNRPE	-6.52029	-2.52029	2.30492e-17	8.22071e-15	1	1
OGT	-6.51205	-2.51205	1.73754e-12	2.69439e-10	1	1
NDUFB9	-6.50909	-2.50909	4.71001e-17	1.52716e-14	1	1
SRSF3	-6.50324	-2.50324	3.54073e-13	6.31419e-11	1	1
PES1	-6.48571	-2.48571	9.0519e-14	1.79358e-11	1	1
PSMG3	-6.47019	-2.47019	1.32239e-11	1.66072e-09	1	1
UBE2N	-6.46576	-2.46576	2.78785e-17	9.70806e-15	1	1
WDR12	-6.44493	-2.44493	5.49547e-13	9.42315e-11	1	1
RARS2	-6.43382	-2.43382	9.39774e-15	2.09487e-12	1	1
RABGGTA	-6.43244	-2.43244	3.78657e-11	4.41346e-09	1	1
RPS5	-6.41982	-2.41982	2.83082e-17	9.70806e-15	1	1
RPS29	-6.41377	-2.41377	9.96975e-20	6.34966e-17	1	1
LAMTOR2	-6.40789	-2.40789	2.93874e-13	5.34761e-11	1	1
CACTIN	-6.39912	-2.39912	5.35917e-14	1.07382e-11	1	1
KLF1	-6.39826	-2.39826	2.82096e-12	3.99623e-10	1	1
TOMM22	-6.38653	-2.38653	7.47032e-16	1.98833e-13	1	1
TIMM13	-6.37859	-2.37859	7.57091e-15	1.7534e-12	1	1
RPL23	-6.36717	-2.36717	2.82356e-12	3.99623e-10	1	1
RPL13A	-6.36192	-2.36192	8.55001e-15	1.95477e-12	1	1
GTF3C1	-6.34651	-2.34651	1.2417e-10	1.25103e-08	1	1
SYS1	-6.34494	-2.34494	3.37791e-17	1.11552e-14	1	1
NELFB	-6.33915	-2.33915	2.88733e-11	3.43265e-09	1	1
CDK7	-6.32488	-2.32488	3.67023e-16	1.02268e-13	1	1
MRPL11	-6.30602	-2.30602	3.25587e-13	5.86483e-11	1	1
OIP5	-6.28949	-2.28949	1.71712e-15	4.25297e-13	1	1
RAN	-6.28311	-2.28312	2.28838e-10	2.17471e-08	1	1
CCDC86	-6.28061	-2.28061	9.4085e-13	1.53928e-10	1	1
TICRR	-6.2724	-2.2724	4.56379e-13	7.90156e-11	1	1
FNTB	-6.27041	-2.27041	2.34814e-12	3.48954e-10	1	1
MRPL18	-6.25993	-2.25993	5.24397e-12	7.19351e-10	1	1
RPL7	-6.25651	-2.25651	3.40777e-14	6.98514e-12	1	1
RBX1	-6.24155	-2.24155	5.65952e-17	1.77353e-14	1	1
RPS4X	-6.23293	-2.23293	8.99285e-16	2.35837e-13	1	1
SMG7	-6.23236	-2.23236	2.75177e-12	3.95744e-10	1	1
RAD1	-6.22965	-2.22965	8.41022e-11	8.71974e-09	1	1
PDSS2	-6.21946	-2.21946	1.7887e-12	2.72631e-10	1	1
ATP6V0B	-6.21619	-2.21619	3.1476e-15	7.48416e-13	1	1
ISG20L2	-6.21409	-2.21409	9.96513e-12	1.27848e-09	1	1
SCO2	-6.20711	-2.20711	3.78903e-12	5.27251e-10	1	1
EMG1	-6.20183	-2.20183	7.05387e-11	7.39951e-09	1	1
COPA	-6.19796	-2.19796	4.37078e-11	4.99642e-09	1	1
SNAPC5	-6.19771	-2.19771	1.67802e-15	4.21465e-13	1	1
RPL24	-6.19721	-2.19721	8.92674e-12	1.16197e-09	1	1
PSMA1	-6.18684	-2.18684	4.25311e-11	4.89327e-09	1	1
NDUFAF3	-6.17891	-2.17891	4.50838e-10	3.98009e-08	1	1
GLRX5	-6.16597	-2.16597	7.9732e-13	1.32884e-10	1	1
PFDN6	-6.16255	-2.16255	1.5935e-11	1.92005e-09	1	1
THAP1	-6.16252	-2.16252	1.39182e-11	1.72364e-09	1	1
MCM2	-6.16208	-2.16208	6.32609e-12	8.48219e-10	1	1
PDRG1	-6.16202	-2.16202	2.13482e-15	5.14462e-13	1	1
RIOK2	-6.16068	-2.16068	4.63159e-10	4.04878e-08	1	1
UTP23	-6.15192	-2.15192	4.80848e-10	4.14249e-08	1	1
SUPT5H	-6.14973	-2.14977	9.0264e-09	5.79021e-07	1	1
RPS8	-6.14895	-2.14895	8.86862e-12	1.16197e-09	1	1
RNF168	-6.14087	-2.14087	9.2709e-14	1.81679e-11	1	1
CSTF3	-6.13898	-2.13898	2.61563e-10	2.42941e-08	1	1
CARS2	-6.13792	-2.13792	1.25896e-13	2.43084e-11	1	1
EIF3B	-6.13578	-2.13578	1.3001e-16	3.73947e-14	1	1
EIF4A1	-6.13309	-2.13309	1.82268e-10	1.80577e-08	1	1
RPLP2	-6.13259	-2.13259	1.94145e-14	4.12165e-12	1	1
NDUFV2	-6.13199	-2.13199	1.91897e-10	1.87e-08	1	1
AK6	-6.11557	-2.11557	8.6196e-11	8.88516e-09	1	1
DONSON	-6.11235	-2.11235	1.15296e-10	1.16822e-08	1	1
FXN	-6.11178	-2.11178	3.7949e-10	3.40072e-08	1	1
TOP1	-6.10767	-2.10767	9.28904e-11	9.5202e-09	1	1
NAA30	-6.1031	-2.1031	3.9501e-11	4.57417e-09	1	1
UPF1	-6.10262	-2.10262	1.29907e-11	1.64301e-09	1	1
CDC20	-6.1024	-2.1024	3.48814e-18	1.38231e-15	1	1
TYMS	-6.10205	-2.10206	1.00098e-10	1.02002e-08	1	1
GADD45A	-6.1013	-2.1013	2.57948e-12	3.77048e-10	1	1
WNK1	-6.10121	-2.10121	2.26835e-10	2.17471e-08	1	1
MRPS22	-6.09707	-2.09707	4.72192e-14	9.56886e-12	1	1
MRPL45	-6.09584	-2.09584	3.63462e-10	3.29016e-08	1	1
CCDC84	-6.09545	-2.09545	1.46794e-12	2.31661e-10	1	1
MRPL38	-6.09119	-2.0912	1.7156e-09	1.31872e-07	1	1
GLTSCR2	-6.08851	-2.08851	5.58412e-10	4.73083e-08	1	1
CDS2	-6.08383	-2.08383	1.96608e-09	1.48564e-07	1	1
USP39	-6.0733	-2.0733	5.9824e-12	8.08213e-10	1	1
TRAPPC8	-6.07321	-2.07321	3.59276e-11	4.21511e-09	1	1
ANAPC15	-6.06363	-2.06363	1.46127e-13	2.77222e-11	1	1
RPS18	-6.06078	-2.06078	1.26769e-13	2.43084e-11	1	1
IPO7	-6.06026	-2.06026	4.4287e-13	7.74285e-11	1	1
TRMT61A	-6.05028	-2.05028	5.21324e-11	5.81049e-09	1	1
EIF2AK4	-6.04842	-2.04842	9.22332e-13	1.52296e-10	1	1
BCAS2	-6.04817	-2.04817	9.55743e-10	7.81824e-08	1	1
COX18	-6.03758	-2.03762	7.47434e-09	4.82935e-07	1	1
ATPAF2	-6.033	-2.033	4.29511e-13	7.58363e-11	1	1
NRBP1	-6.02998	-2.03003	1.19205e-08	7.48517e-07	1	1
GPKOW	-6.02898	-2.02899	1.36726e-09	1.08338e-07	1	1
MED14	-6.02787	-2.029	2.6047e-07	1.21915e-05	1	1
WDR74	-6.02276	-2.02278	6.03915e-09	4.00357e-07	1	1
DIEXF	-6.0223	-2.0223	9.85706e-12	1.27378e-09	1	1
UQCRC1	-6.02209	-2.02209	2.29264e-10	2.17471e-08	1	1
SURF6	-6.02189	-2.02189	6.80705e-11	7.2256e-09	1	1
RPS28	-6.00873	-2.00873	4.69292e-10	4.08238e-08	1	1
SARS2	-6.00644	-2.00645	3.15428e-09	2.25001e-07	1	1
NAE1	-5.99181	-1.99181	4.7572e-10	4.11821e-08	1	1
VPS72	-5.99103	-1.99103	5.84053e-11	6.34176e-09	1	1
AAMP	-5.99035	-1.99035	5.29657e-10	4.51932e-08	1	1
SLC16A1	-5.98345	-1.98346	3.68512e-09	2.57115e-07	1	1
MED12	-5.98203	-1.98204	1.39034e-09	1.09224e-07	1	1
EMC7	-5.97577	-1.97577	1.78132e-12	2.72631e-10	0.397859	1
SF3A2	-5.96541	-1.96541	3.76748e-10	3.39321e-08	1	1
PPAN	-5.96317	-1.96323	1.18465e-08	7.46495e-07	1	1
CCNA2	-5.95593	-1.95593	1.84165e-12	2.78323e-10	1	1
TTI2	-5.95302	-1.95302	2.60491e-10	2.42941e-08	1	1
TOE1	-5.95124	-1.95124	1.59523e-13	2.9945e-11	1	1
XRN1	-5.94796	-1.94796	7.28579e-13	1.22573e-10	1	1
HARS	-5.9471	-1.9471	1.72231e-13	3.19937e-11	1	1
DYNLRB1	-5.93119	-1.93177	1.35392e-07	6.7068e-06	1	1
TNPO1	-5.93012	-1.93022	2.222e-08	1.30345e-06	1	1
UTP15	-5.92889	-1.9289	1.8096e-09	1.37908e-07	1	1
PPP1R35	-5.92847	-1.92848	1.64142e-10	1.63527e-08	1	1
PRPF38B	-5.92561	-1.92561	1.44899e-12	2.30713e-10	1	1
MTPAP	-5.92497	-1.92515	4.07455e-08	2.24958e-06	1	1
MCUR1	-5.92068	-1.92068	3.81402e-12	5.27251e-10	1	1
RPS23	-5.91803	-1.91803	2.20947e-10	2.12981e-08	1	1
PHF5A	-5.91323	-1.91323	4.5122e-11	5.09279e-09	1	1
MRPL10	-5.91311	-1.91311	1.03132e-12	1.6569e-10	1	1
AATF	-5.91204	-1.91204	2.60972e-12	3.78367e-10	1	1
SLC7A6OS	-5.90714	-1.90717	5.8061e-09	3.87791e-07	1	1
NUDCD3	-5.90618	-1.90618	5.45627e-11	6.04359e-09	1	1
MTHFD1	-5.90605	-1.90605	1.62926e-12	2.54865e-10	1	1
FCF1	-5.90256	-1.90257	9.70871e-10	7.90573e-08	1	1
PLK1	-5.89764	-1.89764	3.18292e-10	2.91082e-08	1	1
PREB	-5.89085	-1.89095	2.34347e-08	1.36127e-06	1	1
TSEN54	-5.88946	-1.88946	6.11717e-11	6.53218e-09	1	1
INTS5	-5.8879	-1.88812	5.12804e-08	2.77958e-06	1	1
RPS11	-5.87827	-1.87827	6.0629e-13	1.02971e-10	1	1
YKT6	-5.87269	-1.8727	8.58301e-10	7.05349e-08	1	1
MRPL43	-5.87103	-1.87105	5.35605e-09	3.63173e-07	1	1
CAD	-5.86924	-1.86979	1.28387e-07	6.41326e-06	1	1
GPATCH1	-5.86924	-1.86932	2.01763e-08	1.1914e-06	1	1
DTYMK	-5.86849	-1.86854	1.30062e-08	8.13821e-07	1	1
NUFIP1	-5.866	-1.866	8.47794e-10	6.9994e-08	1	1
MRPL52	-5.86594	-1.86595	1.54113e-09	1.20013e-07	1	1
HSF1	-5.86331	-1.86331	5.08727e-10	4.3616e-08	1	1
ELP5	-5.85995	-1.86002	1.72316e-08	1.03815e-06	1	1
SNW1	-5.85686	-1.85696	2.33049e-08	1.35833e-06	1	1
MED9	-5.85501	-1.85502	2.77141e-09	2.01725e-07	1	1
EIF3I	-5.85493	-1.85494	2.48554e-09	1.82406e-07	1	1
MCM3	-5.85466	-1.85474	1.81085e-08	1.0873e-06	1	1
BOP1	-5.85076	-1.85083	1.52279e-08	9.29995e-07	1	1
HAUS3	-5.84483	-1.84484	1.15125e-09	9.23648e-08	1	1
BUB3	-5.83932	-1.83933	2.14693e-09	1.58864e-07	1	1
COX8A	-5.83853	-1.83853	2.02307e-10	1.96073e-08	1	1
CHAF1A	-5.83784	-1.83785	1.20993e-09	9.63241e-08	1	1
POLR2A	-5.83518	-1.83518	1.0286e-09	8.33772e-08	1	1
NDUFB10	-5.83279	-1.8328	3.0594e-09	2.1911e-07	1	1
GOSR2	-5.83149	-1.8315	7.84307e-10	6.50537e-08	1	1
NUP88	-5.83126	-1.83126	7.74846e-11	8.0806e-09	1	1
WDR25	-5.83086	-1.83087	1.0507e-09	8.47834e-08	1	1
PSMB3	-5.8268	-1.8268	1.88738e-10	1.84932e-08	1	1
SPATA5L1	-5.82534	-1.82535	3.26702e-09	2.32114e-07	1	1
MRPS9	-5.8248	-1.82606	2.91833e-07	1.33786e-05	1	1
NOL12	-5.82412	-1.82419	1.4966e-08	9.21645e-07	1	1
COX15	-5.82382	-1.82383	1.98424e-09	1.49303e-07	1	1
MRPL3	-5.8208	-1.8208	2.75232e-10	2.54312e-08	1	1
RFC3	-5.81929	-1.8193	2.51608e-10	2.36154e-08	1	1
NAMPT	-5.81827	-1.81827	1.43538e-11	1.75323e-09	1	1
RPS20	-5.8174	-1.8174	3.09957e-10	2.84921e-08	1	1
RNASEH1	-5.81684	-1.81684	3.85199e-10	3.43463e-08	1	1
NDUFB11	-5.8141	-1.81411	3.3507e-09	2.36178e-07	1	1
AP2S1	-5.80926	-1.80928	4.05694e-09	2.79333e-07	1	1
TUBB	-5.80855	-1.80855	6.09703e-11	6.53218e-09	1	1
PSMD4	-5.80754	-1.80756	2.86235e-09	2.07497e-07	1	1
USB1	-5.80621	-1.80621	2.4852e-10	2.3449e-08	1	1
EMC3	-5.80069	-1.80071	3.69099e-09	2.57115e-07	1	1
MARS2	-5.79951	-1.79956	9.46371e-09	6.02737e-07	1	1
DHX33	-5.79354	-1.79354	9.79156e-13	1.58739e-10	1	1
RRS1	-5.78968	-1.78968	5.73437e-11	6.27368e-09	1	1
CTNNBL1	-5.78286	-1.78286	1.27761e-10	1.27998e-08	1	1
SLC30A9	-5.7827	-1.78271	2.04951e-09	1.53567e-07	1	1
WDR61	-5.78237	-1.78244	1.48781e-08	9.21252e-07	1	1
GATC	-5.78161	-1.78164	7.07107e-09	4.61899e-07	1	1
ZNF830	-5.78068	-1.78073	1.08396e-08	6.85564e-07	1	1
RPS2	-5.78019	-1.7803	2.5768e-08	1.48233e-06	1	1
TAZ	-5.77757	-1.77757	1.84148e-10	1.81432e-08	1	1
RFT1	-5.77745	-1.77765	4.44286e-08	2.44536e-06	1	1
MRPS15	-5.77631	-1.77632	1.37298e-09	1.08338e-07	1	1
GTF3C4	-5.77379	-1.77379	6.85102e-10	5.70907e-08	1	1
SSBP3	-5.77136	-1.77137	5.59751e-10	4.73083e-08	1	1
NDUFB2	-5.76532	-1.76534	4.20075e-09	2.87019e-07	1	1
MCAT	-5.76282	-1.76282	4.48705e-11	5.09279e-09	1	1
RBM22	-5.7605	-1.7605	1.49105e-11	1.80883e-09	1	1
TMED10	-5.76035	-1.76152	2.70983e-07	1.25845e-05	1	1
TAF1C	-5.75964	-1.75995	7.08677e-08	3.71701e-06	1	1
MED19	-5.75114	-1.75114	1.33702e-11	1.66734e-09	1	1
NOM1	-5.75072	-1.75072	4.48364e-10	3.97795e-08	1	1
RNPC3	-5.7473	-1.7475	4.53191e-08	2.47148e-06	1	1
TRMT6	-5.74636	-1.74659	5.37786e-08	2.88866e-06	1	1
FDX1L	-5.74361	-1.74361	3.67154e-12	5.15547e-10	1	1
SNRNP27	-5.74355	-1.74366	2.4043e-08	1.39208e-06	1	1
HJURP	-5.73315	-1.73498	4.21696e-07	1.9184e-05	1	1
XPO5	-5.73257	-1.7326	5.79107e-09	3.87791e-07	1	1
RANGAP1	-5.72286	-1.72524	5.50143e-07	2.43442e-05	1	1
MDN1	-5.72173	-1.72173	1.43138e-11	1.75323e-09	1	1
TUBA1B	-5.72075	-1.72075	1.28181e-11	1.63275e-09	1	1
GINS4	-5.71991	-1.71992	1.15501e-09	9.23648e-08	1	1
RBBP4	-5.71989	-1.71995	1.36277e-08	8.46772e-07	1	1
POLE	-5.71982	-1.72011	6.77535e-08	3.56415e-06	1	1
ATL2	-5.71589	-1.71589	5.86772e-11	6.34176e-09	1	1
TUBGCP5	-5.7146	-1.7148	4.59678e-08	2.49922e-06	1	1
ATR	-5.71259	-1.7126	1.48694e-09	1.16301e-07	1	1
GAR1	-5.70982	-1.7107	2.02167e-07	9.63969e-06	1	1
CDC40	-5.70977	-1.7098	5.38107e-09	3.63487e-07	1	1
MEN1	-5.70925	-1.70926	2.95386e-09	2.13264e-07	1	1
WDR82	-5.70643	-1.70656	3.11543e-08	1.775e-06	1	1
MED20	-5.70548	-1.70849	6.95705e-07	3.01862e-05	1	1
ALG1	-5.70401	-1.71148	1.73485e-06	6.78457e-05	1	1
STAT5B	-5.70385	-1.70392	1.71684e-08	1.03784e-06	1	1
CTU2	-5.70205	-1.70209	8.77835e-09	5.65142e-07	1	1
PSMC1	-5.70199	-1.70235	8.24434e-08	4.26149e-06	1	1
CCT3	-5.6992	-1.6992	3.50075e-11	4.13436e-09	1	1
ATP5F1	-5.69647	-1.6965	6.76468e-09	4.45146e-07	1	1
ATP1B3	-5.69451	-1.69454	7.24836e-09	4.70036e-07	1	1
RPL4	-5.69417	-1.69459	9.71011e-08	4.96162e-06	1	1
RGP1	-5.69224	-1.69238	3.15905e-08	1.78914e-06	1	1
FAU	-5.69093	-1.69101	1.82681e-08	1.08955e-06	1	1
NDUFAB1	-5.69067	-1.69304	5.47276e-07	2.42776e-05	1	1
TERF2	-5.68769	-1.6882	1.16871e-07	5.87086e-06	1	1
ZNF808	-5.68009	-1.68011	3.02614e-09	2.17601e-07	1	1
METTL14	-5.6785	-1.67908	1.33696e-07	6.65979e-06	1	1
KIAA0391	-5.67569	-1.67594	5.75607e-08	3.06412e-06	1	1
RPL10	-5.67372	-1.67372	6.63088e-12	8.82452e-10	1	1
POLR2G	-5.66908	-1.66908	5.66711e-12	7.71463e-10	1	1
GEMIN5	-5.66451	-1.66453	3.56626e-09	2.50382e-07	1	1
RPL31	-5.66361	-1.6638	4.45704e-08	2.44561e-06	1	1
EHMT1	-5.66108	-1.66114	1.49878e-08	9.21645e-07	1	1
YY1	-5.66083	-1.69463	8.09329e-06	0.000272316	1	1
CENPA	-5.66054	-1.66067	3.04729e-08	1.74174e-06	1	1
TUT1	-5.64979	-1.65181	4.65183e-07	2.10015e-05	1	1
EIF2B5	-5.649	-1.65021	2.80391e-07	1.29182e-05	1	1
WDR48	-5.6465	-1.64654	9.19061e-09	5.87441e-07	1	1
NKAP	-5.64416	-1.64419	5.75153e-09	3.87045e-07	1	1
CHCHD1	-5.63863	-1.63863	4.61136e-10	4.04878e-08	1	1
SHC1	-5.63641	-1.63643	4.13946e-09	2.83919e-07	1	1
YEATS4	-5.63619	-1.6362	2.12941e-09	1.58224e-07	0.411844	1
TGS1	-5.63505	-1.64405	2.0927e-06	8.07773e-05	1	1
ZNF622	-5.63498	-1.6377	6.3017e-07	2.76114e-05	1	1
CENPT	-5.63147	-1.63195	1.10624e-07	5.62038e-06	1	1
NOC4L	-5.63125	-1.63521	9.16127e-07	3.84407e-05	1	1
PLK4	-5.63119	-1.63121	3.87708e-09	2.67984e-07	1	1
EXOSC2	-5.62882	-1.62931	1.12531e-07	5.6849e-06	1	1
TUBGCP6	-5.62727	-1.6273	5.84809e-09	3.89138e-07	1	1
NUP133	-5.62442	-1.62526	1.93839e-07	9.31734e-06	1	1
DNTTIP1	-5.62411	-1.6242	2.0127e-08	1.1914e-06	1	1
RBM8A	-5.61947	-1.63819	4.40596e-06	0.000159374	1	1
UBL5	-5.61858	-1.6186	3.85523e-09	2.67511e-07	1	1
ANAPC4	-5.61858	-1.61875	4.07166e-08	2.24958e-06	1	1
HEATR3	-5.61147	-1.61183	8.30513e-08	4.2805e-06	1	1
SNRPB	-5.61076	-1.61215	3.20859e-07	1.46715e-05	1	1
GTF2H3	-5.60704	-1.60705	1.92941e-09	1.46414e-07	1	1
RPS27A	-5.60238	-1.60329	2.09401e-07	9.95801e-06	1	1
CDIPT	-5.59986	-1.6	3.16032e-08	1.78914e-06	1	1
POLR2I	-5.59953	-1.60022	1.58379e-07	7.78063e-06	1	1
ZMYM3	-5.59862	-1.60539	1.57251e-06	6.25948e-05	1	1
HBS1L	-5.59684	-1.59701	3.82339e-08	2.1441e-06	1	1
EP300	-5.59452	-1.59453	1.74774e-09	1.33766e-07	1	1
MRPL16	-5.5939	-1.59712	7.44111e-07	3.18219e-05	1	1
FANCM	-5.5855	-1.58581	7.11385e-08	3.72027e-06	1	1
DDX3X	-5.58543	-1.58543	1.86352e-12	2.79261e-10	1	1
SMARCC1	-5.58542	-1.58542	3.34605e-10	3.04439e-08	1	1
RPL17	-5.58493	-1.58493	5.59702e-11	6.16121e-09	1	1
EXOSC1	-5.58269	-1.58272	6.96176e-09	4.5643e-07	1	1
DCTN2	-5.58207	-1.60259	4.83925e-06	0.000171909	1	1
PSIP1	-5.58068	-1.58182	2.61667e-07	1.22155e-05	1	1
TSFM	-5.58019	-1.58035	3.51301e-08	1.97626e-06	1	1
DPH2	-5.57906	-1.58162	5.90064e-07	2.59818e-05	1	1
WDR43	-5.57849	-1.57859	2.33079e-08	1.35833e-06	1	1
KMT2B	-5.57577	-1.57578	1.61476e-09	1.252e-07	1	1
C19orf53	-5.57236	-1.58509	2.97531e-06	0.000110309	1	1
MRPL19	-5.571	-1.57471	8.57102e-07	3.60936e-05	1	1
WDR3	-5.5707	-1.57119	1.12069e-07	5.67764e-06	1	1
BCL2L1	-5.5696	-1.56967	1.51854e-08	9.29995e-07	1	1
XRCC5	-5.56909	-1.57187	6.43095e-07	2.81086e-05	1	1
WDR92	-5.5685	-1.56934	1.92075e-07	9.25748e-06	1	1
CPSF3L	-5.56848	-1.56849	6.24428e-10	5.2279e-08	1	1
TIMM50	-5.56578	-1.56679	2.33222e-07	1.1032e-05	1	1
PGD	-5.56492	-1.56545	1.21456e-07	6.08406e-06	1	1
BOD1L1	-5.56403	-1.56409	1.32224e-08	8.24457e-07	1	1
MED28	-5.56309	-1.56312	6.63329e-09	4.38117e-07	1	1
KIN	-5.56023	-1.56057	7.8691e-08	4.09124e-06	1	1
EIF4G1	-5.559	-1.64462	2.17934e-05	0.000662082	1	1
TFB2M	-5.5501	-1.5508	1.63011e-07	7.9862e-06	1	1
IER2	-5.54968	-1.55684	1.66066e-06	6.55189e-05	1	1
TFRC	-5.54938	-1.54938	6.09532e-10	5.12725e-08	1	1
CHKA	-5.54205	-1.54316	2.55288e-07	1.19804e-05	1	1
TIMMDC1	-5.54121	-1.54122	2.06368e-09	1.53982e-07	1	1
MRPS2	-5.54042	-1.54049	1.62564e-08	9.86056e-07	1	1
PHIP	-5.53976	-1.54289	7.23139e-07	3.10741e-05	1	1
RPL18A	-5.53734	-1.53744	2.47753e-08	1.42983e-06	1	1
DCTN3	-5.53579	-1.53661	1.89451e-07	9.18066e-06	1	1
HIC2	-5.5347	-1.53689	5.05171e-07	2.26349e-05	1	1
INTS8	-5.53426	-1.54029	1.39887e-06	5.65669e-05	1	1
MED18	-5.53425	-1.59679	1.54893e-05	0.000486305	1	1
SUPV3L1	-5.53345	-1.53345	5.06538e-11	5.6812e-09	0.161496	1
TBCB	-5.53112	-1.54041	2.16212e-06	8.30971e-05	1	1
DNAJC17	-5.53	-1.53223	5.15827e-07	2.30545e-05	1	1
SNF8	-5.52696	-1.52755	1.34801e-07	6.69612e-06	1	1
GARS	-5.5243	-1.52517	1.9872e-07	9.52626e-06	1	1
PISD	-5.52311	-1.52384	1.67078e-07	8.16302e-06	1	1
ZMYND8	-5.51969	-1.52051	1.87984e-07	9.1344e-06	1	1
SCD	-5.51883	-1.51909	6.05308e-08	3.2031e-06	1	1
RPUSD4	-5.51378	-1.51691	7.22902e-07	3.10741e-05	1	1
RRP12	-5.51248	-1.5151	6.04347e-07	2.65451e-05	1	1
POLR2B	-5.50883	-1.52126	2.90468e-06	0.000108367	1	1
DNAJC9	-5.50558	-1.50646	2.01888e-07	9.63969e-06	1	1
CTC1	-5.49961	-1.49964	7.1876e-09	4.67797e-07	1	1
POLR1C	-5.49821	-1.49822	2.49991e-09	1.82709e-07	1	1
TXN2	-5.49533	-1.50244	1.65085e-06	6.52763e-05	1	1
MCM6	-5.48947	-1.49297	8.0909e-07	3.43536e-05	1	1
VPS35	-5.48943	-1.50002	2.46868e-06	9.35076e-05	1	1
NUFIP2	-5.48415	-1.49645	2.87264e-06	0.000107396	1	1
CAMLG	-5.48216	-1.48955	1.71683e-06	6.73867e-05	1	1
TTC1	-5.4797	-1.48513	1.25804e-06	5.14736e-05	1	1
MRPS11	-5.47929	-1.47929	8.14103e-12	1.0754e-09	1	1
ERCC1	-5.47805	-1.48308	1.16383e-06	4.81544e-05	1	1
FNTA	-5.47659	-1.53504	1.44067e-05	0.000456332	1	1
PRPF19	-5.47381	-1.47992	1.4155e-06	5.71102e-05	1	1
MRPL51	-5.47278	-1.48003	1.68471e-06	6.63212e-05	1	1
TINF2	-5.47254	-1.47285	7.29442e-08	3.80355e-06	1	1
WDHD1	-5.47113	-1.4874	3.81773e-06	0.000139226	1	1
PAF1	-5.47063	-1.47064	2.41695e-09	1.78105e-07	1	1
SNRNP40	-5.46906	-1.46913	1.61444e-08	9.82602e-07	1	1
MED24	-5.46603	-1.4717	1.31373e-06	5.34878e-05	1	1
CENPI	-5.46513	-1.49866	8.02604e-06	0.000270564	1	1
FARSB	-5.46041	-1.46061	4.50788e-08	2.46592e-06	1	1
LEO1	-5.46023	-1.46026	4.75295e-09	3.23509e-07	1	1
EXOSC3	-5.45985	-1.46923	2.1846e-06	8.37805e-05	1	1
TSR2	-5.45936	-1.47526	3.72963e-06	0.000136853	1	1
LUC7L3	-5.45689	-1.45903	4.94829e-07	2.22836e-05	1	1
NCBP2	-5.45357	-1.45357	6.96307e-11	7.34748e-09	0.135481	1
MAPK14	-5.45001	-1.45018	3.84957e-08	2.15202e-06	1	1
AHCY	-5.44876	-1.44995	2.73128e-07	1.26512e-05	1	1
CENPE	-5.44266	-1.4619	4.53127e-06	0.000163575	1	1
ATP6V1A	-5.44254	-1.44262	1.82308e-08	1.08955e-06	1	1
ORC1	-5.43854	-1.49935	1.50278e-05	0.000473482	1	1
NACA	-5.43764	-1.46176	5.71198e-06	0.000199338	1	1
RSL24D1	-5.43352	-1.43361	2.06406e-08	1.2148e-06	1	1
RPL10A	-5.43121	-1.43423	6.99428e-07	3.0274e-05	1	1
COQ5	-5.42868	-1.49777	1.72446e-05	0.000534822	1	1
UBA1	-5.42835	-1.51586	2.23244e-05	0.000675911	1	1
GCSH	-5.42814	-1.44893	4.9051e-06	0.000173673	1	1
RBM33	-5.42795	-1.46783	9.61671e-06	0.000316996	1	1
ROMO1	-5.42776	-1.49352	1.63464e-05	0.000509624	1	1
COA3	-5.42598	-1.42621	5.17189e-08	2.79486e-06	1	1
DOLK	-5.42536	-1.42658	2.81067e-07	1.29182e-05	1	1
ABT1	-5.42189	-1.42929	1.71934e-06	6.73867e-05	1	1
EIF5A	-5.41983	-1.5392	3.16341e-05	0.000912833	1	1
NDUFB6	-5.41969	-1.43234	2.9562e-06	0.000109983	1	1
SF3A1	-5.41947	-1.45957	9.67262e-06	0.000317664	1	1
MRPS5	-5.41902	-1.4191	1.91079e-08	1.13583e-06	1	1
ELL	-5.41831	-1.47224	1.32208e-05	0.000421011	1	1
UNC45A	-5.41784	-1.41808	5.47741e-08	2.93329e-06	1	1
WAC	-5.41354	-1.41881	1.22017e-06	5.02524e-05	1	1
SMARCB1	-5.41295	-1.52699	3.00292e-05	0.000877886	1	1
RPLP0	-5.41198	-1.43199	4.71438e-06	0.000168143	1	1
DDX18	-5.4104	-1.41387	8.0157e-07	3.41155e-05	1	1
ISCU	-5.40999	-1.41365	8.45224e-07	3.57177e-05	1	1
ATP5L	-5.40962	-1.40962	1.65401e-09	1.27688e-07	1	1
NOP2	-5.40844	-1.53622	3.42088e-05	0.000974514	1	1
DARS2	-5.40785	-1.44758	9.57877e-06	0.00031633	1	1
MBD3	-5.40574	-1.40618	1.01363e-07	5.16459e-06	1	1
UBE2I	-5.40525	-1.43854	7.96799e-06	0.000269116	1	1
GEMIN6	-5.40489	-1.44135	8.75804e-06	0.000291929	1	1
NCAPH2	-5.40435	-1.40457	5.23307e-08	2.81938e-06	1	1
MAD2L2	-5.4042	-1.55104	4.02306e-05	0.00112982	1	1
EIF2B4	-5.40187	-1.41206	2.37414e-06	9.0273e-05	1	1
PFAS	-5.39853	-1.39878	5.75041e-08	3.06412e-06	1	1
SKA3	-5.39614	-1.46687	1.76859e-05	0.000546608	1	1
TUBE1	-5.39606	-1.39795	4.37012e-07	1.98301e-05	1	1
CTR9	-5.39442	-1.40211	1.78789e-06	6.96146e-05	1	1
CUL1	-5.39422	-1.41702	5.39117e-06	0.000189254	1	1
TAF11	-5.39278	-1.4248	7.65044e-06	0.000259867	1	1
TUBGCP4	-5.39102	-1.39644	1.25655e-06	5.14736e-05	1	1
THAP11	-5.38489	-1.39161	1.55845e-06	6.23134e-05	1	1
SEPHS2	-5.38476	-1.38917	1.02144e-06	4.25594e-05	1	1
DCAF7	-5.38308	-1.40774	5.84358e-06	0.000203136	1	1
PAFAH1B1	-5.3826	-1.38265	1.08411e-08	6.85564e-07	1	1
PSMD8	-5.38113	-1.3813	4.02861e-08	2.23807e-06	1	1
MASTL	-5.37994	-1.3867	1.57004e-06	6.25948e-05	1	1
DDI2	-5.37534	-1.3764	2.45166e-07	1.15662e-05	0.266845	1
KRI1	-5.37387	-1.38464	2.51055e-06	9.46703e-05	1	1
MRPS35	-5.37312	-1.37594	6.49988e-07	2.83404e-05	1	1
CPSF2	-5.37131	-1.43589	1.6033e-05	0.000500731	1	1
DHX30	-5.37056	-1.37419	8.38754e-07	3.55285e-05	1	1
MAK16	-5.36889	-1.36952	1.45083e-07	7.16695e-06	1	1
PFDN5	-5.35993	-1.36449	1.05464e-06	4.38403e-05	1	1
SRSF7	-5.35812	-1.38289	5.8691e-06	0.00020323	1	1
RAD51C	-5.35749	-1.36728	2.28029e-06	8.72625e-05	1	1
NRDE2	-5.35604	-1.35891	6.63993e-07	2.88804e-05	1	1
MRPS18A	-5.3505	-1.36838	4.2046e-06	0.00015271	1	1
DLST	-5.34402	-1.34523	2.77076e-07	1.28008e-05	1	1
MED21	-5.34391	-1.41708	1.83504e-05	0.000565187	1	1
ANAPC5	-5.34299	-1.42534	2.08764e-05	0.00063748	1	1
BYSL	-5.34185	-1.37601	8.18282e-06	0.000274294	1	1
GPN1	-5.33873	-1.39082	1.27451e-05	0.000408783	1	1
XAB2	-5.33641	-1.33682	9.3712e-08	4.8022e-06	1	1
C7orf26	-5.33638	-1.37121	8.35117e-06	0.000279412	1	1
DCP2	-5.33515	-1.42323	2.24858e-05	0.000679643	1	1
PSMB6	-5.32976	-1.33557	1.34626e-06	5.46874e-05	1	1
INTS1	-5.32825	-1.34253	3.34302e-06	0.000123429	1	1
TRAPPC4	-5.32419	-1.32454	8.09711e-08	4.19755e-06	1	1
INTS10	-5.32139	-1.33294	2.69644e-06	0.000101233	1	1
TPT1	-5.31974	-1.32525	1.27778e-06	5.21434e-05	1	1
SDAD1	-5.31952	-1.35794	9.25136e-06	0.000306085	1	1
IMP3	-5.31734	-1.4427	3.34611e-05	0.000960887	1	1
DDHD1	-5.31575	-1.33265	3.96757e-06	0.000144395	1	1
MED17	-5.3156	-1.32639	2.51593e-06	9.46703e-05	1	1
PMPCB	-5.31463	-1.31627	3.79425e-07	1.73051e-05	1	1
EEF2	-5.31383	-1.52821	6.38242e-05	0.00169877	1	1
STARD7	-5.31169	-1.31866	1.61805e-06	6.42642e-05	1	1
EIF4ENIF1	-5.30988	-1.31056	1.55129e-07	7.64205e-06	1	1
BNIP1	-5.3083	-1.33928	7.39467e-06	0.000251659	1	1
MPV17L2	-5.30669	-1.30896	5.24085e-07	2.3365e-05	1	1
PSMA4	-5.30628	-1.30933	7.05292e-07	3.04539e-05	1	1
CSNK1A1	-5.3056	-1.3335	6.63407e-06	0.000227074	1	1
CHEK1	-5.30546	-1.32163	3.79344e-06	0.000138624	1	1
IARS	-5.30523	-1.30952	9.93392e-07	4.14875e-05	1	1
KDM1A	-5.30435	-1.39727	2.38582e-05	0.000711476	1	1
ZFP91	-5.30164	-1.35827	1.39274e-05	0.000441935	1	1
ELP4	-5.30129	-1.30357	5.26829e-07	2.34288e-05	1	1
TEN1	-5.30066	-1.32614	6.04277e-06	0.000208032	1	1
COX10	-5.30026	-1.42637	3.36916e-05	0.000964401	1	1
PSMC4	-5.29845	-1.30432	1.36037e-06	5.51351e-05	1	1
SOD2	-5.29813	-1.29826	2.95361e-08	1.69363e-06	1	1
MRPL53	-5.29626	-1.55339	8.07708e-05	0.00208752	1	1
CINP	-5.29592	-1.34798	1.27331e-05	0.000408783	1	1
HARS2	-5.29539	-1.32953	8.17817e-06	0.000274294	1	1
SNRNP25	-5.29321	-1.41211	3.14923e-05	0.000911509	1	1
DDX10	-5.29283	-1.47374	5.16727e-05	0.00141766	1	1
DDOST	-5.2927	-1.45942	4.68006e-05	0.00129131	1	1
GPN3	-5.2924	-1.29455	4.98214e-07	2.23795e-05	1	1
COASY	-5.29044	-1.29082	8.75591e-08	4.49983e-06	1	1
DNM1L	-5.29016	-1.34326	1.30056e-05	0.000415642	1	1
PYROXD1	-5.29007	-1.39867	2.8412e-05	0.000836091	1	1
EMC4	-5.28759	-1.28853	2.16115e-07	1.02499e-05	1	1
RRP1	-5.28422	-1.2845	6.41219e-08	3.3831e-06	1	1
TAF5	-5.28244	-1.30325	4.90839e-06	0.000173673	1	1
LONP1	-5.27796	-1.28412	1.42715e-06	5.74499e-05	1	1
TIMM22	-5.27345	-1.3345	1.50936e-05	0.000474715	1	1
DDX56	-5.26924	-1.35907	2.29791e-05	0.00068756	1	1
RNMT	-5.26834	-1.27151	7.31262e-07	3.13476e-05	1	1
CUL3	-5.26688	-1.27305	1.43202e-06	5.75162e-05	1	1
DNAJA3	-5.26685	-1.26685	2.658e-13	4.88662e-11	1	1
RRM2	-5.2667	-1.31538	1.18603e-05	0.000383858	1	1
RIOK1	-5.26592	-1.27651	2.4697e-06	9.35076e-05	1	1
C16orf59	-5.26486	-1.28331	4.33921e-06	0.000157279	1	1
CDK12	-5.26411	-1.2649	1.82981e-07	8.91556e-06	1	1
SNRPC	-5.25798	-1.29461	8.79971e-06	0.000292771	1	1
PITRM1	-5.25529	-1.29059	8.46824e-06	0.000282798	1	1
NDUFC1	-5.25059	-1.25073	3.23395e-08	1.82503e-06	1	1
NAPA	-5.24989	-1.33921	2.28327e-05	0.000686521	1	1
CCNK	-5.24882	-1.24997	2.65406e-07	1.23577e-05	1	1
POLG	-5.24555	-1.24753	4.55573e-07	2.06199e-05	1	1
SAE1	-5.2455	-1.24632	1.90248e-07	9.19429e-06	1	1
COA6	-5.24038	-1.2404	3.32142e-09	2.35043e-07	1	1
PPP1R15B	-5.23936	-1.24754	1.90191e-06	7.37322e-05	1	1
RPS15	-5.23579	-1.31657	2.04408e-05	0.000626325	1	1
YLPM1	-5.2357	-1.26152	6.12456e-06	0.000210442	1	1
SASS6	-5.23483	-1.25833	5.56023e-06	0.000194805	1	1
NEDD8-MDP1	-5.23405	-1.27998	1.11562e-05	0.000363045	1	1
RAD9A	-5.23044	-1.31875	2.25512e-05	0.000680465	1	1
POLG2	-5.22756	-1.24366	3.77599e-06	0.00013827	1	1
RNPS1	-5.22573	-1.3276	2.64353e-05	0.000781792	1	1
RPL7L1	-5.22521	-1.23285	1.77557e-06	6.9286e-05	1	1
RPRD2	-5.2248	-1.2253	1.15585e-07	5.82266e-06	1	1
C1QBP	-5.2246	-1.23003	1.25848e-06	5.14736e-05	1	1
MNT	-5.22077	-1.2461	6.0059e-06	0.000207163	1	1
MRPS10	-5.22027	-1.22045	3.98675e-08	2.22174e-06	0.793793	1
RPS12	-5.21994	-1.36823	4.06986e-05	0.00114116	1	1
PCYT2	-5.2179	-1.41835	5.86554e-05	0.00158726	1	1
MRPL37	-5.21708	-1.22115	9.41561e-07	3.94152e-05	1	1
TCOF1	-5.21355	-1.42009	6.08937e-05	0.00163051	1	1
SMU1	-5.21327	-1.27216	1.45221e-05	0.000459173	1	1
EXOSC7	-5.21061	-1.21883	1.91258e-06	7.39848e-05	1	1
POLE2	-5.20893	-1.21138	5.65876e-07	2.49784e-05	1	1
SRP54	-5.20786	-1.27125	1.57155e-05	0.000492538	1	1
BCS1L	-5.20379	-1.23305	6.96917e-06	0.000238086	1	1
ADSS	-5.20088	-1.28578	2.15903e-05	0.000657032	1	1
CCND3	-5.19877	-1.40247	5.98424e-05	0.00161037	1	1
UMPS	-5.19753	-1.21742	4.68574e-06	0.000167778	1	1
TADA2B	-5.19707	-1.21073	3.19392e-06	0.000118169	1	1
EIF2B3	-5.19683	-1.41021	6.34463e-05	0.00169124	1	1
ZC3H13	-5.19388	-1.21821	5.76157e-06	0.000200676	1	1
RPS13	-5.1869	-1.24067	1.31794e-05	0.000420446	1	1
DDX5	-5.18606	-1.31244	3.37739e-05	0.000965209	1	1
PRPF31	-5.18552	-1.39028	6.02377e-05	0.0016178	1	1
RNASEK	-5.18468	-1.20716	5.31154e-06	0.000186826	1	1
SFPQ	-5.18236	-1.33107	4.0833e-05	0.00114313	1	1
NCL	-5.17868	-1.25505	1.92271e-05	0.000591168	1	1
CCDC115	-5.17339	-1.27403	2.60777e-05	0.000773784	1	1
PMVK	-5.17309	-1.21021	8.92443e-06	0.000296367	1	1
CDK9	-5.17128	-1.17764	1.4757e-06	5.91374e-05	1	1
RCOR1	-5.17072	-1.20299	7.71417e-06	0.000261534	1	1
LAGE3	-5.16441	-1.32281	4.40124e-05	0.00122254	1	1
SPOP	-5.16311	-1.20362	9.77802e-06	0.000320536	1	1
CARS	-5.16125	-1.23127	1.74934e-05	0.000541596	1	1
BTAF1	-5.16085	-1.22956	1.71423e-05	0.000532577	1	1
EFR3A	-5.16	-1.1866	6.31481e-06	0.000216561	1	1
RPL13	-5.15955	-1.20139	1.01144e-05	0.000330953	1	1
GRSF1	-5.15628	-1.20366	1.15264e-05	0.000373728	1	1
RPS3	-5.15228	-1.44656	9.69169e-05	0.00246958	1	1
MAP2K3	-5.15219	-1.15552	7.69859e-07	3.28443e-05	1	1
RPUSD3	-5.15019	-1.35613	6.06715e-05	0.001627	1	1
SMCHD1	-5.14927	-1.17881	7.03779e-06	0.000239971	1	1
HNRNPU	-5.14471	-1.37207	6.87916e-05	0.00182282	1	1
TKT	-5.13931	-1.25517	3.05727e-05	0.000892312	1	1
LENG1	-5.13806	-1.18949	1.25724e-05	0.000405433	1	1
MRPL47	-5.13706	-1.1565	4.57787e-06	0.000164924	1	1
NOC3L	-5.13029	-1.24215	2.93788e-05	0.000861699	1	1
SLC25A26	-5.12904	-1.24809	3.15371e-05	0.000911509	0.152954	1
CDC6	-5.12898	-1.27435	3.9755e-05	0.00111822	1	1
PAGR1	-5.12855	-1.13565	1.64756e-06	6.52763e-05	1	1
GATA1	-5.1262	-1.14112	3.49518e-06	0.000128514	1	1
IMP4	-5.12257	-1.28492	4.53286e-05	0.00125461	1	1
TUBG2	-5.12167	-1.12193	5.92253e-08	3.14335e-06	1	1
CDC23	-5.12157	-1.29909	5.04943e-05	0.00138747	1	1
FBL	-5.12031	-1.2216	2.62661e-05	0.000778078	1	1
NOP16	-5.11825	-1.41258	9.69387e-05	0.00246958	1	1
MTFMT	-5.11043	-1.11414	8.58167e-07	3.60936e-05	1	1
TAF8	-5.11021	-1.37469	8.3856e-05	0.00216099	1	1
GPN2	-5.10639	-1.37227	8.445e-05	0.00217316	1	1
EIF2S3	-5.09659	-1.21919	3.26151e-05	0.000938106	1	1
SF3B1	-5.09556	-1.28337	5.41041e-05	0.00147529	1	1
QARS	-5.09489	-1.09599	2.53165e-07	1.19121e-05	1	1
RPL23A	-5.0948	-1.22056	3.35857e-05	0.000962917	1	1
HTATSF1	-5.09365	-1.32614	7.07992e-05	0.00185944	1	1
DBF4	-5.09357	-1.29516	5.90709e-05	0.00159608	1	1
C9orf114	-5.09286	-1.10553	2.96034e-06	0.000109983	1	1
NAA50	-5.09219	-1.19919	2.79395e-05	0.000824909	1	1
TPX2	-5.09159	-1.14816	1.39097e-05	0.000441935	1	1
TRMT5	-5.09004	-1.09482	1.10707e-06	4.59126e-05	1	1
HYOU1	-5.08892	-1.38001	9.54733e-05	0.00244272	1	1
RPS19BP1	-5.08737	-1.24986	4.53779e-05	0.00125461	1	1
TAF12	-5.08071	-1.1008	4.73394e-06	0.000168504	1	1
PET117	-5.07839	-1.16754	2.27883e-05	0.000686459	1	1
NDUFAF5	-5.07767	-1.12123	1.05486e-05	0.000343901	1	1
IWS1	-5.07688	-1.11698	9.67177e-06	0.000317664	1	1
RNASEH2C	-5.07614	-1.46504	0.000144853	0.00357283	1	1
ARFRP1	-5.07256	-1.15485	2.08638e-05	0.00063748	1	1
SMARCD1	-5.07235	-1.16204	2.29386e-05	0.000687501	1	1
ARMC7	-5.07232	-1.0868	3.39107e-06	0.000124944	1	1
KPNB1	-5.07219	-1.40486	0.000115117	0.00290364	1	1
IDH3A	-5.07081	-1.18798	3.09679e-05	0.000900897	1	1
KCMF1	-5.06589	-1.08739	5.0751e-06	0.000179216	1	1
NDUFS1	-5.0657	-1.20985	3.93665e-05	0.00110904	1	1
PRMT5	-5.06393	-1.26679	5.9539e-05	0.00160629	1	1
USPL1	-5.06185	-1.07265	2.51633e-06	9.46703e-05	1	1
ELAVL1	-5.05684	-1.2606	5.98706e-05	0.00161037	1	1
CAPZB	-5.05566	-1.17251	3.08734e-05	0.000899617	1	1
NPLOC4	-5.05086	-1.16939	3.13805e-05	0.000909932	1	1
NDUFA2	-5.04816	-1.05728	2.12239e-06	8.17464e-05	1	1
PELP1	-5.04436	-1.18839	3.93253e-05	0.00110904	1	1
VPS13D	-5.04289	-1.19631	4.23702e-05	0.00118431	1	1
ADSL	-5.04168	-1.06127	4.61618e-06	0.000165969	1	1
WDR18	-5.04065	-1.22606	5.32515e-05	0.00145426	1	1
SRSF11	-5.03757	-1.15131	2.99366e-05	0.000876616	1	1
MRPL12	-5.03352	-1.03868	1.19381e-06	4.92805e-05	1	1
DDX49	-5.03345	-1.24069	6.11543e-05	0.00163503	1	1
CLSPN	-5.03112	-1.05508	5.67314e-06	0.000198371	1	1
TMA16	-5.03094	-1.16233	3.53297e-05	0.00100484	1	1
TEFM	-5.03007	-1.04984	4.65689e-06	0.000167095	1	1
BRF2	-5.03005	-1.22072	5.51196e-05	0.00149612	1	1
EIF2S2	-5.02908	-1.05407	5.92416e-06	0.000204739	1	1
INPPL1	-5.0258	-1.19267	4.68499e-05	0.00129131	1	1
POLR2J	-5.02485	-1.05731	7.75947e-06	0.000262571	1	1
UTP20	-5.02204	-1.14918	3.40126e-05	0.000970474	1	1
MED27	-5.02173	-1.08602	1.59536e-05	0.000499123	1	1
DPAGT1	-5.01951	-1.02737	1.82513e-06	7.09097e-05	1	1
NCAPH	-5.01764	-1.25065	7.10039e-05	0.00186208	1	1
PRPF8	-5.01191	-1.20569	5.62335e-05	0.00152403	1	1
LAS1L	-5.01102	-1.40047	0.000145158	0.00357543	1	1
INO80B	-5.01085	-1.0208	2.31772e-06	8.85051e-05	1	1
HINFP	-5.00546	-1.05155	1.11957e-05	0.000363668	1	1
C19orf70	-5.00474	-1.14714	3.88007e-05	0.00109831	1	1
MRPS30	-5.00456	-1.36701	0.000130379	0.00325183	1	1
RPL12	-5.00327	-1.05449	1.25159e-05	0.000404342	1	1
CYB5B	-4.99952	-1.02425	5.85818e-06	0.00020323	1	1
HUS1	-4.99746	-1.01739	4.69475e-06	0.000167778	1	1
AARS2	-4.99537	-1.10256	2.79933e-05	0.000825131	1	1
GNB1L	-4.99334	-1.22218	6.93719e-05	0.00182465	1	1
RPL3	-4.9884	-1.08677	2.5419e-05	0.000756756	1	1
TP53RK	-4.98666	-1.12158	3.64327e-05	0.00103456	1	1
NOP14	-4.98582	-1.23212	7.6319e-05	0.0019956	1	1
WBP4	-4.98402	-1.0217	9.06208e-06	0.000300379	1	1
KDSR	-4.98205	-1.08089	2.55563e-05	0.000759577	1	1
AKIRIN2	-4.9745	-1.03398	1.46783e-05	0.000463288	1	1
ZFAT	-4.97428	-1.32454	0.000124002	0.00311016	1	1
CHMP2A	-4.97076	-1.14208	4.83637e-05	0.00133097	1	1
UROD	-4.97055	-0.992846	5.26711e-06	0.000185629	1	1
ZNRD1	-4.96781	-1.04454	1.93229e-05	0.00059309	1	1
PDXK	-4.96545	-1.05227	2.21286e-05	0.000671121	1	1
SSRP1	-4.96307	-1.01555	1.28439e-05	0.000411214	1	1
TMX2	-4.95997	-1.17465	6.39379e-05	0.00169926	1	1
TIMM9	-4.95764	-0.969829	2.84518e-06	0.000106592	1	1
MAD2L1BP	-4.95208	-1.09612	3.93264e-05	0.00110904	1	1
MVK	-4.94802	-1.32527	0.000138368	0.00343188	1	1
DCTN6	-4.94555	-1.19944	7.94273e-05	0.00205577	1	1
RAE1	-4.945	-1.10402	4.42165e-05	0.0012263	1	1
RPP40	-4.94038	-1.24271	0.000100599	0.0025519	1	1
DKC1	-4.93579	-1.09348	4.37762e-05	0.00121788	1	1
DNAJC21	-4.9357	-1.27506	0.000118451	0.00297933	1	1
RBMX2	-4.93171	-1.00331	1.79246e-05	0.000553026	1	1
UQCC1	-4.92851	-1.30281	0.000136755	0.0033966	1	1
DCTN5	-4.9239	-1.19928	8.85302e-05	0.00227159	1	1
MRPS24	-4.91965	-1.21514	9.74684e-05	0.00247686	1	1
SON	-4.91472	-1.17497	8.20741e-05	0.00211813	1	1
ATP2A2	-4.91276	-1.06737	4.27607e-05	0.00119264	1	1
ASH2L	-4.9096	-1.35049	0.000175991	0.00424689	1	1
MCMBP	-4.90797	-1.15531	7.67419e-05	0.00200372	1	1
NDOR1	-4.90736	-1.0187	2.92229e-05	0.000858537	1	1
ATP1A1	-4.90723	-1.27371	0.000132528	0.0033008	1	1
NCOR2	-4.9021	-1.1305	6.91973e-05	0.00182465	1	1
MRPL44	-4.89474	-1.31057	0.000160515	0.00391046	1	1
HK2	-4.89406	-1.14721	7.91227e-05	0.00205087	1	1
C18orf21	-4.88695	-1.1371	7.78896e-05	0.00202184	1	1
UBTF	-4.87818	-1.08707	6.17684e-05	0.00164898	1	1
SAMM50	-4.87167	-1.26855	0.00014939	0.00366448	1	1
CDC123	-4.87096	-1.14604	8.83984e-05	0.00227148	1	1
ASF1A	-4.86963	-0.960771	2.33501e-05	0.000697493	1	1
MTBP	-4.86603	-0.917943	1.26976e-05	0.00040873	1	1
KIF4A	-4.84814	-1.17882	0.000114133	0.00288292	1	1
RPP38	-4.84699	-1.00172	4.2802e-05	0.00119264	1	1
CENPU	-4.83394	-1.0624	6.92242e-05	0.00182465	1	1
HAUS4	-4.82906	-1.19074	0.000129974	0.00324626	1	1
SLBP	-4.82646	-1.00937	5.2373e-05	0.00143246	1	1
IDH3B	-4.82582	-0.94787	3.24506e-05	0.000934881	1	1
SLC20A1	-4.82515	-1.20693	0.000140869	0.00348906	1	1
CPSF1	-4.81821	-1.35568	0.000244725	0.00570482	1	1
API5	-4.81383	-0.995909	5.20817e-05	0.00142669	1	1
RPLP1	-4.8101	-0.820232	2.36095e-06	8.99634e-05	1	1
CAB39	-4.80924	-0.997324	5.41996e-05	0.00147564	1	1
EWSR1	-4.80921	-0.89865	2.28673e-05	0.000686521	1	1
PGAM1	-4.80434	-1.20896	0.000153873	0.00375893	1	1
PABPN1	-4.80034	-1.1186	0.000108092	0.00273418	1	1
PTPMT1	-4.79344	-0.878005	2.14963e-05	0.000655288	1	1
ANAPC2	-4.79131	-0.980996	5.47707e-05	0.00148891	1	1
DNLZ	-4.78642	-1.28647	0.000216269	0.00511502	1	1
MED30	-4.7759	-1.0018	6.82269e-05	0.00181055	1	1
CHMP4B	-4.77474	-0.914341	3.79106e-05	0.00107482	1	1
ELP6	-4.77231	-1.00781	7.19912e-05	0.0018852	1	1
EIF3D	-4.76655	-1.15323	0.000143597	0.00354677	1	1
C20orf24	-4.76618	-1.01631	7.78789e-05	0.00202184	1	1
MRPL39	-4.76316	-1.10794	0.0001212	0.00304417	1	1
REXO2	-4.75802	-0.986678	6.93004e-05	0.00182465	1	1
MED31	-4.75426	-0.796576	1.0233e-05	0.000334222	1	1
E2F4	-4.74036	-0.857834	3.10621e-05	0.000902166	1	1
PHAX	-4.73914	-1.11249	0.000136242	0.00338857	1	1
PSMG4	-4.7294	-1.26103	0.000240116	0.00561941	1	1
WDR46	-4.71725	-1.17881	0.000189436	0.0045406	1	1
TRAPPC3	-4.71391	-1.28995	0.000276737	0.00640085	1	1
TRUB2	-4.70908	-1.21998	0.000224266	0.00529713	1	1
INCENP	-4.70035	-1.21834	0.000229605	0.00540892	1	1
PLRG1	-4.69138	-0.758128	1.66126e-05	0.00051702	1	1
RRAGA	-4.69133	-1.05046	0.000128627	0.00321711	1	1
DDX11	-4.6907	-1.12395	0.000171175	0.00415314	1	1
ZMAT5	-4.68793	-1.26714	0.000279498	0.00645633	1	1
COA5	-4.67734	-1.12613	0.000181052	0.00435134	1	1
SIN3A	-4.67549	-1.2756	0.000298204	0.00683744	1	1
EIF1AX	-4.67508	-0.925056	7.78192e-05	0.00202184	1	1
PTTG1	-4.67428	-1.14085	0.000192803	0.00460893	1	1
NUP62	-4.66752	-1.16728	0.000216057	0.00511502	1	1
RAD51D	-4.66646	-1.10061	0.00017174	0.00416119	1	1
TRIM37	-4.66589	-1.20655	0.000247263	0.00575644	1	1
ZBTB8OS	-4.66334	-1.18885	0.000235363	0.00552995	1	1
GATAD2A	-4.65977	-1.09469	0.000172222	0.00416721	1	1
UFSP2	-4.6549	-0.946405	9.56626e-05	0.00244406	1	1
CDK13	-4.65087	-1.13889	0.000207627	0.00493682	1	1
CIAPIN1	-4.64333	-1.21374	0.000271884	0.00629677	1	1
MMS19	-4.64227	-0.870033	6.89502e-05	0.00182432	1	1
TADA1	-4.63853	-1.12783	0.00020853	0.00495169	1	1
XRCC6	-4.63581	-1.03107	0.000148462	0.00364673	1	1
RUVBL2	-4.63035	-1.16545	0.000242844	0.00566838	1	1
CHTF18	-4.61823	-1.08153	0.000190608	0.00456257	1	1
VPS16	-4.60928	-1.2312	0.000318712	0.00727472	1	1
TFG	-4.60393	-1.08357	0.000201743	0.00480331	1	1
GTF2F2	-4.60024	-0.848792	7.72339e-05	0.00201361	1	1
PPWD1	-4.59951	-1.01838	0.000162341	0.00394956	1	1
EXOSC6	-4.59924	-0.994364	0.000148386	0.00364673	0.0655051	1
RBMX	-4.58565	-0.892243	0.000102578	0.0025984	1	1
DNAJC8	-4.57218	-1.12245	0.000255036	0.00592967	1	1
GINS1	-4.56706	-1.0226	0.00018546	0.0044513	1	1
COPE	-4.56612	-1.2189	0.000349553	0.0079006	1	1
DDX28	-4.55795	-1.02933	0.000196059	0.00468047	1	1
IK	-4.55262	-1.1699	0.00031426	0.00718487	1	1
CDC25A	-4.54759	-0.990792	0.000177461	0.00427658	1	1
PRPF4B	-4.54543	-0.946049	0.000151549	0.00370722	1	1
MAU2	-4.53733	-0.946078	0.000156301	0.00381302	1	1
MBTPS2	-4.51174	-1.06837	0.000260272	0.00603566	1	1
EIF3F	-4.51013	-1.13235	0.000319006	0.00727472	1	1
MRPL9	-4.50633	-1.09853	0.000291024	0.00669656	1	1
CENPK	-4.49984	-1.16845	0.000366236	0.00825676	1	1
TIPIN	-4.49306	-0.941719	0.000180967	0.00435134	1	1
ARCN1	-4.493	-1.16403	0.000368845	0.00830508	1	1
HUWE1	-4.47546	-0.859343	0.000142037	0.0035131	1	1
TBCC	-4.45905	-0.976523	0.000229211	0.00540678	1	1
CNOT3	-4.45771	-1.01192	0.000258267	0.00599696	1	1
TCP1	-4.44375	-1.23296	0.000515472	0.0113768	1	1
CHORDC1	-4.42463	-1.21464	0.000516608	0.0113877	1	1
NUP54	-4.42056	-0.710342	9.48885e-05	0.00243125	1	1
N6AMT1	-4.41925	-1.01946	0.000298297	0.00683744	1	1
ERH	-4.41242	-1.13696	0.000430325	0.00960449	1	1
RTN4IP1	-4.40452	-0.827297	0.000164713	0.00400182	1	1
CDCA5	-4.39206	-0.747662	0.000126781	0.0031754	1	1
MRPS6	-4.38616	-1.00123	0.000312161	0.00714604	1	1
MTG2	-4.37773	-1.26623	0.000673567	0.014542	1	1
ATP6V0C	-4.37354	-1.06674	0.000393395	0.00881333	1	1
ELAC2	-4.37005	-1.19484	0.000568027	0.0123834	1	1
UBA52	-4.36448	-0.861399	0.000213991	0.0050746	1	1
WBP1	-4.36407	-0.698821	0.00011615	0.00292557	1	1
ATXN7L3	-4.35646	-0.833223	0.000199754	0.00476231	0.737203	1
IMMT	-4.35454	-1.03637	0.000380648	0.00856001	1	1
SNIP1	-4.35372	-0.952108	0.000296631	0.00681677	1	1
ACLY	-4.35031	-1.01692	0.000364096	0.00821889	1	1
SUGT1	-4.34929	-0.93271	0.000283193	0.00653322	1	1
DCTN1	-4.34889	-0.882865	0.000241959	0.00565511	1	1
ABHD11	-4.34127	-0.636841	9.75021e-05	0.00247686	1	1
EARS2	-4.34122	-0.98734	0.00034271	0.00776562	1	1
RPL15	-4.34041	-1.0999	0.000474764	0.0105043	1	1
SYNCRIP	-4.33377	-1.01885	0.000384263	0.00863043	1	1
PSMF1	-4.3327	-0.979469	0.000343369	0.00777069	1	1
RPL17-C18orf32	-4.32835	-1.08104	0.000465846	0.0103198	1	1
RPS14	-4.32674	-0.96073	0.000330519	0.00751804	1	1
WARS2	-4.31818	-0.943869	0.000322361	0.00734185	1	1
AGPAT5	-4.31716	-1.12151	0.000537312	0.0117714	1	1
ISY1-RAB43	-4.31178	-1.26897	0.00080613	0.0171139	1	1
ACTL6A	-4.29396	-0.824979	0.000239637	0.00561556	1	1
COPZ1	-4.2916	-1.07682	0.00050984	0.0112664	1	1
ARIH1	-4.28754	-0.818519	0.00023961	0.00561556	1	1
RAB7A	-4.28378	-0.875843	0.000290894	0.00669656	1	1
SLC35A1	-4.2833	-1.09334	0.000545711	0.011926	1	1
COG8	-4.27828	-1.02419	0.00045707	0.0101887	1	1
DHODH	-4.27782	-1.14619	0.000638528	0.0138358	1	1
CRNKL1	-4.27609	-1.1667	0.000677342	0.0146058	1	1
QRSL1	-4.27234	-0.912578	0.000336753	0.00764035	1	1
VPS29	-4.26302	-0.662895	0.000151117	0.00370175	1	1
RAVER1	-4.25714	-1.05656	0.000530102	0.011642	1	1
PPP4R2	-4.2513	-1.15847	0.00070756	0.015184	1	1
ERCC2	-4.24042	-1.11855	0.000655327	0.0141826	1	1
DIDO1	-4.23648	-0.95151	0.00041884	0.0093716	1	1
SPC25	-4.22646	-0.974181	0.000459404	0.0102203	1	1
ACTR1A	-4.22563	-0.973981	0.000460207	0.0102203	1	1
TOMM20	-4.22011	-1.22033	0.000900501	0.0187382	1	1
SRP72	-4.21965	-1.01377	0.000522473	0.0115028	0.00927878	0.909871
RANBP9	-4.21213	-0.92893	0.000420953	0.00940709	1	1
DYNC1H1	-4.19673	-1.2558	0.00104569	0.021336	1	1
EXOSC5	-4.18639	-1.27007	0.0011125	0.0224935	1	1
SS18L2	-4.18183	-1.25873	0.00109372	0.0221892	1	1
TTI1	-4.17206	-1.16004	0.000872707	0.0182664	1	1
EIF4E2	-4.16551	-0.853281	0.000387276	0.00868715	1	1
CEMIP	-4.13789	-0.573815	0.000172851	0.00417677	1	1
UPF2	-4.12774	-1.01276	0.000667397	0.0144263	1	1
TNPO3	-4.10955	-0.954823	0.000600276	0.0130386	1	1
FASTKD5	-4.1091	-1.0266	0.000726978	0.0155576	1	1
POLA2	-4.09964	-1.05004	0.000792064	0.0168354	1	1
PSMB4	-4.09734	-1.01775	0.000732548	0.015645	1	1
PSMC6	-4.09546	-0.927987	0.000580025	0.0126295	1	1
KIF23	-4.09534	-1.00995	0.000721488	0.0154643	1	1
SMG6	-4.08886	-1.07889	0.000877311	0.0183198	1	1
FAM122A	-4.08657	-0.980607	0.000683496	0.0147207	1	1
UBE2M	-4.08332	-0.945191	0.000627563	0.0136148	1	1
MRGBP	-4.08092	-0.717948	0.00033354	0.0075771	1	1
SSU72	-4.0748	-1.14095	0.00106452	0.0216461	1	1
TRA2B	-4.07214	-0.994024	0.000735377	0.0156866	1	1
VPRBP	-4.0606	-1.0966	0.000986429	0.0203027	1	1
FAM58A	-4.06043	-1.0215	0.000814272	0.0172049	1	1
ATP6V1H	-4.05717	-0.808059	0.000463493	0.0102804	1	1
RBM7	-4.05701	-0.577583	0.000231568	0.00544796	1	1
CCT4	-4.0501	-1.09597	0.00101138	0.0207548	1	1
ARID1A	-4.04603	-1.10968	0.00105783	0.0215346	1	1
TAF6	-4.04305	-0.972146	0.000749361	0.0159658	1	1
UQCRC2	-4.04146	-0.999773	0.000808484	0.0171241	1	1
MTHFD2	-4.02052	-0.938334	0.000727584	0.0155576	1	1
NXF1	-4.01798	-0.842778	0.000568025	0.0123834	1	1
ESPL1	-4.00982	-0.758014	0.000460009	0.0102203	1	1
CD3EAP	-4.00055	-0.941982	0.000773839	0.0164676	1	1
TERT	-3.99748	-1.11202	0.00120181	0.0240537	1	1
DDX54	-3.97715	-0.781218	0.000536894	0.0117714	1	1
POLR1E	-3.97386	-0.782127	0.000543082	0.0118832	1	1
SHQ1	-3.96361	-0.998922	0.000984714	0.0203011	1	1
EIF4B	-3.96219	-0.861191	0.000692509	0.0148789	1	1
ERAL1	-3.96068	-0.949315	0.000874176	0.0182757	1	1
GTF2H4	-3.95286	-0.963326	0.000924386	0.0191904	1	1
VPS54	-3.95236	-0.929266	0.000848222	0.0178377	1	1
SPDL1	-3.94877	-1.02794	0.00109996	0.0222905	1	1
NDUFB3	-3.94742	-1.03261	0.00111674	0.0225536	1	1
MCM7	-3.9429	-0.741561	0.000529019	0.0116325	1	1
FOSL1	-3.94034	-1.00129	0.00105068	0.0214135	1	1
ORAOV1	-3.93959	-0.776301	0.000586615	0.0127574	1	1
ATP5O	-3.93721	-1.04234	0.00117388	0.0235476	1	1
DPH1	-3.93298	-1.13033	0.00147525	0.0289737	1	1
RPL36A	-3.93267	-0.981622	0.00101932	0.0208937	1	1
AEBP2	-3.92809	-0.826739	0.000691869	0.0148789	1	1
REV3L	-3.92074	-1.03321	0.00119559	0.0239562	1	1
NAF1	-3.92031	-1.07277	0.00132053	0.0261656	1	1
TSEN34	-3.91477	-1.03076	0.00120612	0.0241129	1	1
RIC1	-3.91257	-0.908603	0.000890911	0.0185603	1	1
MCM4	-3.91071	-1.22323	0.00195361	0.0372209	1	1
MYB	-3.90396	-0.98426	0.0011031	0.0223287	1	1
GTF2H1	-3.90065	-0.997119	0.00114872	0.0230688	1	1
CHAF1B	-3.89353	-0.916827	0.000955103	0.0197591	1	1
PPIL1	-3.89352	-1.03562	0.00128706	0.0255876	1	1
SUPT6H	-3.89072	-0.860216	0.00083217	0.0175622	1	1
KTI12	-3.89037	-0.962203	0.00107987	0.0219331	1	1
ZC3H18	-3.88247	-1.03266	0.00131315	0.0260483	1	1
NOP56	-3.88208	-1.14846	0.00174665	0.0337099	1	1
RAD17	-3.88155	-0.917808	0.000987069	0.0203027	1	1
DAP3	-3.88076	-0.866656	0.000868049	0.0182117	1	1
CLASRP	-3.87394	-0.886586	0.000929539	0.019275	1	1
NDUFB5	-3.86607	-1.02772	0.00135094	0.0266792	1	1
UTP3	-3.86113	-0.821824	0.000813477	0.0172049	1	1
ALDOA	-3.8531	-0.946648	0.00114035	0.0229266	1	1
TIMELESS	-3.84944	-1.12693	0.00179448	0.0344838	1	1
CSTF1	-3.84478	-0.976049	0.00125291	0.0250203	1	1
SAFB	-3.84281	-0.874348	0.000975333	0.0201309	1	1
CDK1	-3.83563	-0.82916	0.000885209	0.0184631	1	1
SPCS2	-3.82227	-0.970131	0.0013056	0.0259274	1	1
GABPA	-3.81515	-0.795246	0.000855206	0.0179634	1	1
SLC29A4	-3.80985	-1.02013	0.00152285	0.0297447	1	1
EIF4A3	-3.80465	-0.857101	0.00102838	0.0210551	1	1
RPL11	-3.79299	-0.884119	0.00113348	0.0228399	1	1
RRN3	-3.78982	-0.820812	0.00097398	0.0201263	1	1
RPS9	-3.78645	-1.15291	0.00222515	0.0418577	1	1
MRPL17	-3.77809	-0.751037	0.000839618	0.0176776	1	1
DNAJA4	-3.76701	-0.753709	0.000869838	0.0182277	1	1
ZNHIT6	-3.76478	-1.17479	0.00247042	0.0459865	1	1
SMC3	-3.76378	-1.00862	0.00165725	0.0321585	1	1
UBE2H	-3.76338	-0.899787	0.001269	0.0253134	1	1
CDT1	-3.76164	-0.820242	0.00104445	0.0213353	1	1
AASDHPPT	-3.76062	-0.918127	0.00133716	0.0264363	1	1
ANAPC11	-3.76036	-1.03315	0.00177412	0.0341388	1	1
FLII	-3.75841	-0.847545	0.00112782	0.0227515	1	1
NEMF	-3.74109	-0.711159	0.0008334	0.0175674	1	1
ELOF1	-3.73972	-0.979251	0.00163593	0.0318141	1	1
PARS2	-3.7335	-1.09962	0.00222338	0.0418577	1	1
PPIH	-3.72563	-1.00367	0.00179688	0.0344927	1	1
NFE2	-3.72215	-0.893025	0.00138208	0.0272639	1	1
SDE2	-3.71785	-0.990757	0.00177461	0.0341388	1	1
RREB1	-3.71672	-0.905534	0.0014446	0.028403	1	1
DDIAS	-3.71425	-1.00132	0.00183672	0.0352196	1	1
HSPA5	-3.69917	-0.988131	0.0018452	0.0353441	1	1
MRPL21	-3.69888	-0.897933	0.00148142	0.0290629	1	1
RPRD1B	-3.69691	-0.851029	0.00132599	0.0262446	1	1
PSMA2	-3.69588	-0.907902	0.00152937	0.0298394	1	1
RPL8	-3.68838	-0.989976	0.00190261	0.0363658	1	1
GNL3L	-3.67849	-0.984859	0.00192476	0.0367497	1	1
SMG5	-3.67335	-1.08397	0.00247408	0.0460065	1	1
MTIF3	-3.6719	-0.729296	0.0010413	0.0212952	1	1
LETM1	-3.66704	-0.876929	0.00152139	0.0297447	1	1
BAZ1B	-3.66653	-0.872874	0.00150823	0.0295239	1	1
PPCDC	-3.66169	-1.08104	0.00252629	0.0468797	1	1
SLC30A1	-3.65134	-0.952384	0.00190006	0.036356	1	1
MARS	-3.64295	-1.01282	0.00224355	0.0421149	1	1
FANCF	-3.64074	-0.780567	0.00127985	0.0255011	1	1
MVD	-3.62674	-0.870877	0.00165442	0.0321386	1	1
PSMD11	-3.61796	-1.08649	0.00284123	0.051649	1	1
WRB	-3.60065	-0.741057	0.00128167	0.0255091	1	1
ATP5J2	-3.59877	-0.912646	0.00196005	0.0373037	1	1
CABIN1	-3.5929	-0.951202	0.00218194	0.0411946	1	1
OTUD5	-3.58103	-1.04548	0.00281372	0.0513058	1	1
RPL32	-3.57397	-0.834602	0.00172235	0.0332771	1	1
U2SURP	-3.5716	-0.664758	0.00113925	0.0229266	1	1
GTPBP8	-3.57138	-0.827786	0.00170471	0.0329719	1	1
IRF2BP2	-3.56976	-0.902323	0.00205064	0.0388206	1	1
DDX19A	-3.566	-0.882629	0.00197316	0.0374733	1	1
NOP10	-3.56515	-0.803218	0.00163007	0.0317348	1	1
PSMC5	-3.55506	-0.808012	0.0016904	0.0327307	1	1
PSMA7	-3.55201	-1.00567	0.00274219	0.0502585	1	1
PGLS	-3.54737	-0.866009	0.00198277	0.0376157	1	1
RSPO3	-3.53742	-0.738355	0.0014883	0.0291659	1	1
COG4	-3.53727	-0.723295	0.0014347	0.0282708	1	1
CWC15	-3.53437	-0.929572	0.00238427	0.0445688	1	1
TBCD	-3.53376	-0.780889	0.00166655	0.032304	1	1
LAP3	-3.52889	-0.487233	0.000808531	0.0171241	1	1
UFL1	-3.51692	-0.885978	0.00223915	0.0420768	1	1
COX6A1	-3.5166	-0.561124	0.00100796	0.0207084	1	1
NSMCE4A	-3.51414	-0.995381	0.00292863	0.0529141	1	1
MRPS28	-3.51109	-1.01014	0.00305541	0.054982	1	1
FBXO28	-3.51002	-1.03014	0.00321223	0.0575137	1	1
CSE1L	-3.50875	-0.512912	0.000909624	0.018906	1	1
NARFL	-3.49184	-0.680604	0.00144443	0.028403	1	1
SCAP	-3.49175	-0.873455	0.00230828	0.0432488	1	1
FARSA	-3.4897	-1.13769	0.00434621	0.0759118	1	1
CWC22	-3.47407	-0.828157	0.00215988	0.0408452	1	1
SHOC2	-3.47201	-0.781217	0.00193801	0.0369631	1	1
MCRS1	-3.47159	-0.926875	0.00275288	0.0503728	1	1
DNAAF2	-3.47101	-0.738595	0.00175175	0.0337718	1	1
RBM42	-3.46907	-1.03435	0.00357524	0.063377	1	1
PCNA	-3.46238	-0.868098	0.00244518	0.0456595	1	1
DPY30	-3.45769	-0.8785	0.00253519	0.046996	1	1
VPS53	-3.44739	-0.829195	0.0023088	0.0432488	1	1
UBR5	-3.43443	-0.997955	0.00356039	0.0631765	1	1
GRPEL1	-3.43154	-1.1259	0.00484719	0.0840039	1	1
RAD21	-3.427	-0.852919	0.00256633	0.0475238	1	1
SNAPC4	-3.42273	-0.869281	0.0026961	0.049669	1	1
URM1	-3.41739	-0.943188	0.0032558	0.0580026	1	1
MIIP	-3.41306	-0.429379	0.000938299	0.019434	1	1
SETDB1	-3.41276	-0.900448	0.00297389	0.0536233	1	1
STX5	-3.40821	-0.928321	0.00321212	0.0575137	1	1
PMF1	-3.40291	-0.908797	0.00310545	0.0557699	1	1
PRPF4	-3.38296	-0.833456	0.00272157	0.0499833	1	1
RCC1	-3.38141	-0.789841	0.00246116	0.0459098	1	1
FAM32A	-3.3739	-0.835597	0.0027953	0.051022	1	1
RFK	-3.37112	-0.882065	0.00314302	0.0563877	1	1
VSTM5	-3.36767	-0.839742	0.00286535	0.0519815	1	1
SRP14	-3.36376	-0.815223	0.00272792	0.0500484	1	1
NUP85	-3.35248	-0.71822	0.00222132	0.0418577	1	1
TCEB1	-3.35051	-0.709007	0.00218297	0.0411946	1	1
ACTR3	-3.34818	-0.90587	0.00351155	0.0623719	1	1
DBR1	-3.34613	-0.952642	0.00394125	0.0694509	1	1
DMRT3	-3.34247	-0.812199	0.00284939	0.0517446	1	1
SURF1	-3.33448	-0.752443	0.00251798	0.0467742	1	1
EIF3A	-3.33124	-0.778972	0.00270371	0.0497578	1	1
JMJD1C	-3.33099	-0.797409	0.00282696	0.0514946	1	1
ICT1	-3.3302	-0.740036	0.0024694	0.0459865	1	1
NDUFB8	-3.32616	-0.939074	0.00400123	0.0704383	1	1
LMO2	-3.31738	-0.932102	0.00401835	0.0706698	1	1
WDR75	-3.30066	-0.778339	0.00290385	0.0525196	1	1
ATXN2L	-3.30012	-0.992493	0.00482466	0.0837762	1	1
NUP153	-3.29897	-0.833225	0.00332182	0.0590608	1	1
LIPT1	-3.29362	-1.04631	0.00555841	0.094403	1	1
NAA25	-3.28296	-0.76047	0.00290266	0.0525196	1	1
UBA2	-3.27888	-0.989841	0.00503993	0.0865034	1	1
LSM4	-3.27665	-0.606822	0.00203883	0.038638	1	1
KPRP	-3.26813	-0.493938	0.00158195	0.0308316	0.911552	1
MRPL46	-3.26098	-0.962392	0.00492819	0.0850769	1	1
CCNH	-3.25945	-0.714914	0.00275408	0.0503728	1	1
QRICH1	-3.25725	-0.724987	0.00283589	0.0516045	0.778246	1
GAB2	-3.25653	-1.00345	0.00548373	0.0932233	1	1
RPL28	-3.25233	-0.646641	0.00237918	0.0445203	1	1
PDCL	-3.2505	-0.888843	0.00424857	0.0744251	1	1
RBM25	-3.25044	-0.5657	0.00196663	0.0373889	1	1
USP8	-3.24653	-1.03684	0.00607045	0.101647	1	1
BORA	-3.24489	-0.767114	0.00322828	0.057716	1	1
KLC2	-3.24362	-0.768989	0.00325249	0.0580017	1	1
SETD1B	-3.22793	-0.728197	0.00306424	0.0550854	1	1
RAB36	-3.2148	-0.699984	0.00295622	0.0533585	1	1
SRSF10	-3.21358	-0.790267	0.00367298	0.0649803	1	1
PCM1	-3.2012	-1.03602	0.00673635	0.111334	1	1
GABPB1	-3.19924	-0.869345	0.00457844	0.0797337	1	1
DHX9	-3.18464	-0.781564	0.00385295	0.0680294	1	1
SLIRP	-3.18458	-0.968897	0.00598579	0.100324	1	1
ITPK1	-3.17908	-0.653145	0.00287897	0.0521755	1	1
RMI2	-3.16798	-0.690427	0.00323	0.057716	1	1
ARPC3	-3.16652	-0.937797	0.00580577	0.0980439	1	1
NDUFV1	-3.16314	-0.863269	0.00491336	0.084903	1	1
EEFSEC	-3.15345	-1.01655	0.00719622	0.117626	1	1
NONO	-3.15172	-1.00934	0.00710471	0.116321	1	1
WDR1	-3.14508	-0.906875	0.00567819	0.0962539	1	1
NCKAP1L	-3.14306	-0.632316	0.00298502	0.0537695	1	1
CCDC130	-3.14292	-0.674259	0.0032989	0.0587119	1	1
POLRMT	-3.14213	-0.591976	0.00271737	0.0499577	1	1
TCEB2	-3.14003	-0.598708	0.00277526	0.0507082	1	1
ZNF592	-3.1363	-0.889988	0.00557131	0.094532	1	1
LSM7	-3.13441	-0.831606	0.00487966	0.0844026	1	1
INTS4	-3.12911	-0.977021	0.00694553	0.114473	1	1
SMNDC1	-3.12139	-0.787076	0.00453112	0.0790641	1	1
PPP1R7	-3.11959	-1.03786	0.0081845	0.131966	1	1
KIF20A	-3.11772	-0.862932	0.00546176	0.0929386	1	1
NMD3	-3.11736	-0.897195	0.00592329	0.0993698	1	1
MAT2A	-3.1107	-0.73774	0.00413681	0.0725386	1	1
KDM8	-3.10335	-0.743798	0.00426964	0.0747209	1	1
PPP1R12A	-3.10247	-0.832108	0.0052659	0.0901217	1	1
SPATA2	-3.09386	-0.5359	0.00266719	0.0492382	1	1
PDSS1	-3.09291	-0.525446	0.00260729	0.0482069	1	1
ZBTB11	-3.08237	-0.665608	0.00373031	0.0659292	1	1
PPP4C	-3.0798	-0.788006	0.00500751	0.0861959	1	1
CCT8	-3.07337	-1.00238	0.00839188	0.134944	1	1
VPS28	-3.07084	-0.87848	0.00632149	0.1055	1	1
SF1	-3.0696	-0.744461	0.00463003	0.0805536	1	1
NDC80	-3.05842	-0.951994	0.00772662	0.125263	1	1
UTP18	-3.05683	-0.580489	0.00323935	0.0578252	1	1
RPL19	-3.05664	-0.679533	0.00409657	0.0719036	1	1
CHMP6	-3.04577	-0.923658	0.0074489	0.12109	1	1
TRPM7	-3.04446	-1.03345	0.00964961	0.152247	1	1
ATP6V1B2	-3.03355	-0.635459	0.00389858	0.068767	1	1
CCNB1	-3.0245	-0.897427	0.00736324	0.120026	1	1
PLXNC1	-3.01298	-0.70997	0.00487724	0.0844026	1	1
DNAAF5	-3.00865	-0.93963	0.00843069	0.135446	1	1
DHX15	-3.00241	-0.819265	0.0064592	0.10735	1	1
PAXBP1	-3.00015	-0.645695	0.00432128	0.0755504	1	1
MRPL4	-2.99089	-0.845198	0.00705007	0.115875	1	1
TSSC1	-2.98869	-0.607378	0.00405608	0.0712631	1	1
PSAT1	-2.9871	-0.797645	0.00636457	0.105975	1	1
CLPP	-2.98533	-0.908593	0.00828039	0.133271	1	1
UBE2E1	-2.98491	-0.764478	0.00591959	0.0993698	1	1
ALYREF	-2.98265	-1.0628	0.0119268	0.183829	1	1
RACGAP1	-2.98214	-0.414894	0.00260863	0.0482069	1	1
PDCD11	-2.98036	-1.03591	0.0112643	0.174995	1	1
DDX51	-2.96952	-0.975357	0.0100354	0.157656	1	1
MRPL28	-2.96661	-0.733057	0.00574039	0.0971237	1	1
COQ6	-2.96165	-0.724148	0.00568761	0.096322	1	1
DUS2	-2.95479	-0.695204	0.00540069	0.092075	1	1
LDB1	-2.95147	-0.938574	0.00960746	0.151888	1	1
DNAH9	-2.95141	-0.680809	0.00526286	0.0901217	1	1
SRPK1	-2.95013	-0.845586	0.00776053	0.125698	1	1
FKBP1A	-2.94741	-0.625434	0.00466458	0.0810754	1	1
ABL1	-2.94673	-0.720464	0.00583925	0.0983299	1	1
NLE1	-2.94196	-0.786097	0.00688454	0.113573	1	1
IARS2	-2.94087	-0.79791	0.00709522	0.116316	1	1
BUB1	-2.93761	-0.681015	0.00543862	0.0926331	1	1
METTL3	-2.93693	-0.897231	0.00902638	0.144495	1	1
MBNL1	-2.93393	-0.732527	0.00618927	0.103443	1	1
FH	-2.92537	-0.701922	0.00587791	0.0988875	1	1
FOXK1	-2.92277	-0.656042	0.0053109	0.0907176	1	1
H2AFX	-2.9217	-0.632495	0.00503805	0.0865034	1	1
BTG1	-2.92146	-0.615207	0.0048402	0.0839643	1	1
TSC22D2	-2.91908	-0.970513	0.0111574	0.17373	1	1
CDK2	-2.91708	-0.781634	0.0072208	0.117812	1	1
GPRIN1	-2.91099	-0.62023	0.00501961	0.0863209	1	1
OXSR1	-2.9061	-0.806458	0.00784977	0.126913	1	1
MRPL20	-2.90477	-0.894035	0.00965578	0.152247	1	1
RPAP2	-2.90445	-0.635522	0.00528361	0.0903381	1	1
ATP5H	-2.90426	-0.684085	0.00592319	0.0993698	1	1
DDA1	-2.90036	-0.878945	0.0094188	0.149568	1	1
FEN1	-2.89629	-0.693146	0.00616403	0.103117	1	1
AURKB	-2.8942	-0.945906	0.0111644	0.17373	1	1
CD320	-2.89384	-0.663552	0.00578449	0.0977771	1	1
TACC3	-2.89277	-0.46059	0.00359672	0.0636945	1	1
CEP55	-2.88746	-0.743337	0.00707592	0.116192	1	1
PINX1	-2.88569	-0.658307	0.00582405	0.0982594	1	1
ARL5C	-2.87394	-0.575811	0.00493355	0.085087	1	1
ETNK1	-2.86526	-0.683103	0.00647419	0.107499	1	1
TRABD2A	-2.86483	-0.67265	0.00632423	0.1055	1	1
ZCCHC7	-2.86337	-0.68991	0.00660714	0.1093	1	1
ENSA	-2.84878	-0.622321	0.00583668	0.0983299	1	1
C11orf16	-2.84466	-0.698452	0.00704161	0.115842	1	1
SPRTN	-2.84172	-0.69255	0.00699303	0.115149	1	1
AURKC	-2.83796	-0.727757	0.00765879	0.124276	1	1
DCTN4	-2.83467	-0.890596	0.0112743	0.174995	1	1
RNASEH2A	-2.83301	-0.877211	0.0109713	0.171323	1	1
DDX27	-2.83137	-0.846558	0.0102558	0.160855	1	1
TAF10	-2.82987	-0.693899	0.00721196	0.117776	1	1
CHTOP	-2.82365	-0.801502	0.00940274	0.149447	1	1
GTF2F1	-2.8102	-0.255897	0.00269059	0.0496187	0.0783601	1
CRLS1	-2.80631	-0.786212	0.00944786	0.149896	1	1
PTPN1	-2.80554	-0.519096	0.00507082	0.08695	1	1
GFI1B	-2.80549	-0.715955	0.00803707	0.129706	1	1
TUFM	-2.80463	-0.777807	0.00930106	0.148094	1	1
FAM78A	-2.80338	-0.678116	0.0073944	0.120424	1	1
BIRC5	-2.79433	-0.968581	0.0148365	0.222149	1	1
BRCA1	-2.79399	-0.894316	0.0124986	0.19132	1	1
COPS3	-2.78515	-0.768085	0.00951459	0.150722	1	1
OXA1L	-2.78471	-0.62121	0.00676276	0.111667	1	1
KAT5	-2.77685	-0.77536	0.00986578	0.155284	1	1
EEF1G	-2.77651	-0.891774	0.0129396	0.197055	1	1
TMEM151B	-2.77379	-0.59282	0.00649215	0.107597	1	1
SRF	-2.77226	-0.748102	0.00935902	0.148884	1	1
ANAPC1	-2.77117	-0.789891	0.0103406	0.162042	1	1
UTP14A	-2.76893	-0.775099	0.010043	0.157656	1	1
WDR55	-2.76495	-0.73306	0.00919204	0.14662	1	1
ATP5D	-2.75279	-0.714305	0.00905203	0.144776	1	1
MED25	-2.74941	-0.568082	0.00648675	0.107597	1	1
NDUFS5	-2.7399	-0.727459	0.00961764	0.151914	1	1
FBLIM1	-2.73401	-0.471013	0.0053576	0.0914279	0.168798	1
LAMTOR3	-2.73324	-0.815173	0.0119764	0.184326	1	1
BCCIP	-2.73276	-0.828549	0.0123679	0.189482	1	1
ALG2	-2.73224	-0.941216	0.01608	0.237773	1	1
TADA3	-2.73165	-0.903932	0.014769	0.22151	1	1
RPL30	-2.72864	-0.816764	0.0121496	0.18678	1	1
CCAR1	-2.72762	-0.754585	0.0105405	0.164884	1	1
YES1	-2.72138	-0.707649	0.00958874	0.151727	1	1
LITAF	-2.72035	-0.597163	0.00743037	0.120899	1	1
ATRIP	-2.71716	-0.86538	0.0139677	0.211448	1	1
TTC27	-2.71706	-0.574987	0.00710982	0.116321	1	1
MED16	-2.71601	-0.600818	0.00757026	0.122951	1	1
NUAK1	-2.7081	-0.605799	0.00780126	0.126243	1	1
UFC1	-2.7062	-0.66422	0.00897854	0.143988	1	1
RTCB	-2.69965	-0.781708	0.0119797	0.184326	1	1
MBOAT7	-2.69117	-0.650061	0.00899675	0.14415	1	1
GAPDH	-2.68983	-0.804998	0.0129368	0.197055	1	1
ZNF407	-2.68363	-0.91945	0.0171117	0.250536	1	1
DRAP1	-2.68281	-0.776991	0.0123217	0.189087	1	1
DMAP1	-2.68078	-0.72582	0.0109928	0.171509	1	1
SMARCE1	-2.67908	-0.756723	0.0118576	0.182922	1	1
RPL37	-2.67668	-0.57753	0.00785878	0.126943	1	1
MIF	-2.6703	-0.780932	0.0128014	0.195377	1	1
TSPYL6	-2.6702	-0.633401	0.00908762	0.145215	1	1
ZC3H8	-2.66697	-0.744459	0.0118533	0.182922	1	1
GTF2A2	-2.65946	-0.841024	0.0150902	0.225568	1	1
ZNF511	-2.65554	-0.91276	0.0179809	0.260905	1	1
PUF60	-2.65384	-0.746291	0.0122722	0.188502	1	1
PPP2R3C	-2.6537	-0.787124	0.0134964	0.204835	1	1
OSGEP	-2.65105	-0.634082	0.00951678	0.150722	1	1
MED6	-2.64801	-0.944685	0.0197005	0.280606	1	1
LRCH2	-2.64502	-0.469011	0.00656795	0.108752	1	1
aavs1Gene145	-2.642	-0.701351	0.0113644	0.176228	1	1
NT5DC3	-2.63596	-0.343308	0.00499734	0.086104	1	1
XRN2	-2.63495	-0.690905	0.0112751	0.174995	1	1
ZBTB7A	-2.63363	-0.568899	0.00851532	0.136682	1	1
BECN1	-2.62841	-0.697105	0.0116136	0.179624	1	1
TFDP3	-2.62216	-0.750675	0.0133435	0.20286	1	1
MTF1	-2.62169	-0.828724	0.0160076	0.237095	1	1
LARS2	-2.61738	-0.778227	0.0143825	0.216077	1	1
GTPBP10	-2.61539	-0.839497	0.0166536	0.244834	1	1
GATB	-2.6135	-0.853107	0.0172624	0.251915	1	1
RPL36	-2.61226	-0.426144	0.00641453	0.106707	1	1
CMTR1	-2.60753	-0.829755	0.0165811	0.243969	1	1
PHF6	-2.59832	-0.811748	0.0162465	0.239639	1	1
CDK8	-2.57705	-0.496228	0.00820196	0.132128	1	1
VPS45	-2.57501	-0.580367	0.010024	0.157636	1	1
NCAPD2	-2.56687	-0.820773	0.0178434	0.259334	1	1
RNF8	-2.55843	-0.584665	0.0105228	0.164752	1	1
PEBP4	-2.54691	-0.845956	0.0198087	0.281923	1	1
SMC2	-2.54535	-0.935419	0.0244511	0.335413	1	1
RALGAPB	-2.54224	-0.570614	0.0105751	0.165281	1	1
TAMM41	-2.54046	-0.681621	0.0137407	0.208189	1	1
UCHL5	-2.54016	-0.672397	0.0134593	0.204447	1	1
ZCRB1	-2.53898	-0.734433	0.015584	0.231784	1	1
ILF3	-2.53541	-0.600264	0.0115105	0.178337	0.519989	1
ALKBH8	-2.53186	-0.582017	0.0111243	0.173409	1	1
NELFCD	-2.52639	-0.765671	0.0172492	0.251915	1	1
COMMD1	-2.52543	-0.68321	0.0142806	0.215089	1	1
LIG1	-2.52257	-0.71717	0.0155531	0.231518	1	1
RRAGC	-2.52199	-0.837183	0.0205628	0.29126	1	1
MECR	-2.51785	-0.511694	0.00975932	0.153744	0.259733	1
ORAI3	-2.50883	-0.729732	0.0165305	0.243426	1	1
IKBKAP	-2.50537	-0.746666	0.0173299	0.252693	1	1
WEE1	-2.50264	-0.787099	0.0191512	0.274095	1	1
PRKAA1	-2.5015	-0.706083	0.0159171	0.235951	1	1
RPAP1	-2.4921	-0.835739	0.0219619	0.307657	1	1
PLCB3	-2.49053	-0.855673	0.0230815	0.319622	1	1
JPH4	-2.48967	-0.584192	0.0123315	0.189087	1	1
TUBB4B	-2.488	-0.640462	0.0141055	0.212992	1	1
IBA57	-2.48491	-0.644081	0.0143268	0.215603	1	1
FAM9A	-2.4826	-0.447803	0.00913005	0.145762	1	1
FAM50A	-2.47963	-0.730745	0.0177284	0.258082	1	1
NOP58	-2.47871	-0.589556	0.0128075	0.195377	1	1
RABGGTB	-2.47811	-0.768363	0.01941	0.277132	1	1
AURKA	-2.47496	-0.828949	0.0224936	0.313382	1	1
TOP3A	-2.46658	-0.801324	0.0215146	0.302579	1	1
PPP4R3A	-2.46556	-0.629294	0.0144791	0.217344	1	1
KANSL3	-2.4645	-0.724929	0.018115	0.262637	1	1
IREB2	-2.46259	-0.600842	0.0136484	0.206966	1	1
ZBTB17	-2.45946	-0.31658	0.00709647	0.116316	0.165502	1
NHP2	-2.45436	-0.793235	0.0217212	0.305003	1	1
PKMYT1	-2.45335	-0.602269	0.0139903	0.211611	1	1
ZMIZ1	-2.45194	-0.606759	0.014183	0.2138	1	1
UROS	-2.44957	-0.745637	0.0196726	0.280433	1	1
ARMC5	-2.44753	-0.787924	0.0217974	0.305833	1	1
NEIL2	-2.44712	-0.726949	0.018947	0.272046	1	1
SDHB	-2.44368	-0.718669	0.0187358	0.269884	1	1
CAPN6	-2.44206	-0.111915	0.00457575	0.0797337	0.707988	1
RTP1	-2.44041	-0.250238	0.00635394	0.105897	0.466734	1
C18orf32	-2.43543	-0.589155	0.0141471	0.213439	1	1
USP37	-2.43394	-0.499586	0.0115319	0.178514	1	1
INO80E	-2.43286	-0.704046	0.0185717	0.267735	1	1
SP2	-2.43237	-0.751747	0.020763	0.293397	1	1
GNPNAT1	-2.43225	-0.701691	0.0184967	0.267087	1	1
CEBPZ	-2.42759	-0.661463	0.0170346	0.249612	1	1
PBRM1	-2.42712	-0.534681	0.0127103	0.194227	1	1
RAD51	-2.42483	-0.797568	0.0234905	0.32373	1	1
RRP36	-2.41866	-0.599792	0.015075	0.225531	1	1
ATXN10	-2.41635	-0.814257	0.0248979	0.340494	1	1
TONSL	-2.41221	-0.730719	0.0207212	0.293038	1	1
XPNPEP3	-2.40953	-0.62152	0.0161925	0.239238	1	1
CAPN10	-2.40789	-0.760641	0.0224297	0.312735	1	1
NUP155	-2.40593	-0.917027	0.0323409	0.420974	1	1
CAND1	-2.40325	-0.691012	0.0192981	0.275755	1	1
NPM1	-2.39595	-0.820348	0.0264701	0.358694	1	1
E4F1	-2.39486	-0.745096	0.0222996	0.311165	1	1
GSTP1	-2.39456	-0.597196	0.0158455	0.235281	1	1
YEATS2	-2.39392	-0.699309	0.0201016	0.285598	1	1
NGRN	-2.38495	-0.676116	0.0194508	0.277493	1	1
SACM1L	-2.38038	-0.61045	0.0168854	0.247629	1	1
SP3	-2.37996	-0.635718	0.0179202	0.260237	1	1
CCDC155	-2.37864	-0.606709	0.0168071	0.246683	1	1
VBP1	-2.37619	-0.754203	0.0237789	0.327199	1	1
AKT2	-2.37473	-0.613257	0.0172194	0.251699	1	1
TAF4	-2.37433	-0.849272	0.0297501	0.393571	1	1
GRPEL2	-2.37232	-0.685345	0.0204599	0.290034	1	1
ABCE1	-2.37188	-0.715958	0.0219841	0.307726	1	1
C16orf71	-2.37119	-0.446638	0.0117972	0.182305	1	1
PPP2R1A	-2.36899	-0.648471	0.0189318	0.272046	1	1
LCMT1	-2.36268	-0.833271	0.0294521	0.390789	1	1
ZG16B	-2.36205	-0.581065	0.0164584	0.242565	1	1
SEPSECS	-2.36076	-0.707901	0.0221403	0.309427	1	1
PPP2CB	-2.36015	-0.795239	0.0271327	0.366123	1	1
SLC25A13	-2.35891	-0.549145	0.0153964	0.229761	1	1
DUSP22	-2.35578	-0.481312	0.0132516	0.201634	1	1
FER1L5	-2.35278	-0.321683	0.00920899	0.146759	1	1
ANLN	-2.35143	-0.816074	0.0290506	0.3869	1	1
ANKLE2	-2.34699	-0.71645	0.0233133	0.321784	1	1
negConGene84	-2.34354	-0.622406	0.0189051	0.271883	1	1
KLK10	-2.34281	-0.612886	0.0185241	0.267265	1	1
CMAS	-2.33502	-0.682563	0.0221609	0.309472	1	1
CACNG5	-2.33205	-0.514593	0.0151244	0.225891	1	1
TBL3	-2.33088	-0.870301	0.0345271	0.446175	1	1
SPATA5	-2.33076	-0.911537	0.0379871	0.481125	1	1
DCAF13	-2.32794	-0.793183	0.0290909	0.387147	1	1
ATP6V0D1	-2.32784	-0.745107	0.0260375	0.353101	1	1
DLD	-2.32399	-0.829046	0.0318927	0.416677	1	1
GDF1	-2.32269	-0.709553	0.0242704	0.333447	1	1
SLC25A19	-2.32242	-0.689358	0.0231775	0.320219	1	1
PSME3	-2.32058	-0.75688	0.0272088	0.366754	1	1
NAIF1	-2.31969	-0.729792	0.0256102	0.348631	1	1
HBB	-2.31807	-0.570654	0.0177889	0.258752	1	1
ACTR2	-2.31634	-0.604	0.0192935	0.275755	1	1
TXNDC16	-2.31558	-0.466127	0.014043	0.212229	1	1
POLE4	-2.31436	-0.801037	0.0305674	0.402826	1	1
NXT1	-2.31314	-0.689953	0.0237128	0.326541	1	1
MED8	-2.30968	-0.723133	0.0258088	0.3507	1	1
RCL1	-2.30554	-0.831134	0.0334421	0.433095	1	1
XRCC1	-2.30356	-0.789204	0.0304943	0.402223	1	1
NSL1	-2.30343	-0.744282	0.0274967	0.370074	1	1
TARS2	-2.29911	-0.653955	0.0225385	0.313762	1	1
HIPK1	-2.29787	-0.714038	0.0259714	0.352472	1	1
AARS	-2.29639	-0.784971	0.0307019	0.404065	1	1
ALOX12	-2.29006	-0.450046	0.0143541	0.215832	1	1
TARDBP	-2.28953	-0.695493	0.0253661	0.345572	1	1
NELFA	-2.28649	-0.611181	0.0210197	0.296459	1	1
GFPT1	-2.28549	-0.779404	0.031083	0.407876	1	1
SLC38A2	-2.28519	-0.610076	0.0210296	0.296459	1	1
CHD7	-2.28382	-0.487885	0.0158979	0.235863	1	1
ALPK3	-2.28048	-0.50536	0.0166836	0.245073	1	1
ZCCHC6	-2.27515	-0.921576	0.0442025	0.545888	1	1
MRPS12	-2.27487	-0.707836	0.0269999	0.365261	1	1
PBX2	-2.272	-0.708726	0.0272352	0.366832	1	1
UBR4	-2.26888	-0.55046	0.0190243	0.272936	1	1
LGALS12	-2.26736	-0.659485	0.0245673	0.336488	1	1
DEFB125	-2.26728	-0.475475	0.0160508	0.237538	1	1
STRAP	-2.26438	-0.678034	0.0258211	0.3507	1	1
PRDM10	-2.25841	-0.597004	0.0217068	0.305003	1	1
HGH1	-2.25821	-0.589194	0.0213279	0.30019	1	1
TACO1	-2.25425	-0.828105	0.0373844	0.475857	1	1
ASL	-2.24811	-0.615125	0.0231819	0.320219	1	1
SPC24	-2.24706	-0.612557	0.0231003	0.319622	1	1
MCCD1	-2.24271	-0.584656	0.021876	0.306694	1	1
ACTR5	-2.24155	-0.792839	0.035487	0.455609	1	1
RPS15A	-2.23709	-0.449979	0.0162262	0.239538	1	1
GNE	-2.23419	-0.695326	0.0288161	0.384638	1	1
SEC16A	-2.23258	-0.678783	0.0278386	0.374111	1	1
OASL	-2.23252	-0.470151	0.0171836	0.251382	1	1
PA2G4	-2.2301	-0.539333	0.0202813	0.28773	1	1
ADAMTS5	-2.22731	-0.330254	0.0125747	0.19232	0.650328	1
SRM	-2.22305	-0.736255	0.0324992	0.422419	1	1
TPI1	-2.22168	-0.676283	0.0283844	0.379729	1	1
NAT6	-2.22019	-0.764543	0.0349225	0.450306	1	1
KCTD5	-2.21639	-0.70672	0.0308264	0.405404	1	1
SLC25A37	-2.21588	-0.498987	0.0190916	0.273683	1	1
SNRNP200	-2.21558	-0.763035	0.0351743	0.452897	1	1
SUGP1	-2.21401	-0.812327	0.039557	0.498096	1	1
ZNF593	-2.21318	-0.603674	0.024475	0.335482	1	1
NDUFA13	-2.21215	-0.596055	0.0241049	0.331428	1	1
NPEPPS	-2.20958	-0.382349	0.0147858	0.221575	1	1
NSRP1	-2.20952	-0.471315	0.0181725	0.263258	1	1
EXOC3	-2.20757	-0.553734	0.0220903	0.30897	1	1
ALG13	-2.20358	-0.699361	0.0312168	0.409331	1	1
SREBF1	-2.19808	-0.700108	0.0316709	0.414674	1	1
ZNF574	-2.19787	-0.586555	0.0243728	0.334595	1	1
PTMA	-2.19723	-0.676056	0.0300183	0.396825	1	1
MTCH2	-2.19642	-0.602103	0.0253499	0.345572	1	1
ZPR1	-2.19563	-0.501309	0.020115	0.285598	1	1
NAA20	-2.19536	-0.770785	0.0375205	0.476909	1	1
ERI2	-2.19515	-0.608194	0.0257849	0.3507	1	1
PRRC2A	-2.19425	-0.890617	0.0496017	0.598476	1	1
ATAD3A	-2.19385	-0.744972	0.0354731	0.455609	1	1
KCNG1	-2.18823	-0.585812	0.0248791	0.340494	1	1
TRIM69	-2.18795	-0.715712	0.0336099	0.434953	1	1
FAHD2A	-2.18336	-0.459124	0.0187696	0.270153	1	1
RGS9BP	-2.17998	-0.644027	0.0290101	0.386649	1	1
RAB17	-2.17812	-0.537023	0.0227509	0.31588	1	1
KIAA1522	-2.17801	-0.5764	0.0249261	0.340619	1	1
UGT2A2	-2.17185	-0.687028	0.0326473	0.424034	1	1
HMGN2	-2.17152	-0.527605	0.022603	0.314415	1	1
ATP6AP1	-2.16957	-0.680403	0.0323213	0.420974	1	1
NCAPG	-2.16876	-0.652168	0.0303373	0.400448	1	1
PKM	-2.16838	-0.730151	0.0363559	0.46409	1	1
VCPIP1	-2.16616	-0.484088	0.0206936	0.29288	1	1
SLC35B1	-2.16608	-0.968811	0.0633934	0.729352	1	1
CDC7	-2.16032	-0.822605	0.0458498	0.562338	1	1
PWWP2A	-2.15977	-0.595001	0.0271415	0.366123	1	1
RABGAP1	-2.1569	-0.479169	0.0209023	0.295131	1	1
DROSHA	-2.1545	-0.396273	0.0173492	0.252768	1	1
FAM96B	-2.15287	-0.633317	0.0301305	0.398012	1	1
FAM43B	-2.15126	-0.344513	0.0155047	0.23099	1	1
SAMD1	-2.14794	-0.6599	0.0324059	0.421512	1	1
ZC3HAV1L	-2.1453	-0.414733	0.0184967	0.267087	1	1
RPL34	-2.13996	-0.77532	0.0430878	0.534343	1	1
ABCF1	-2.13928	-0.806124	0.0463349	0.567897	1	1
NVL	-2.13789	-0.720384	0.0381377	0.482689	1	1
GCN1	-2.13769	-0.641647	0.0318123	0.416221	1	1
PPP2R4	-2.13718	-0.684968	0.0352011	0.452916	1	1
HAUS7	-2.1296	-0.818191	0.0487195	0.589426	1	1
ZC3H4	-2.12896	-0.701347	0.0372586	0.474595	1	1
MYF6	-2.11692	-0.522325	0.0253336	0.345572	1	1
YBEY	-2.11561	-0.625958	0.0322855	0.420974	1	1
EIF3L	-2.11328	-0.772119	0.0454866	0.558652	1	1
ABCD4	-2.10397	-0.55531	0.0281707	0.377153	1	1
NOLC1	-2.10385	-0.723086	0.0415141	0.518069	1	1
NDRG3	-2.10363	-0.387685	0.0191333	0.274059	1	1
GTDC1	-2.10185	-0.612388	0.0322998	0.420974	1	1
NEDD1	-2.09572	-0.655835	0.0362171	0.463207	1	1
DDX52	-2.09141	-0.816342	0.0529795	0.629437	1	1
SPICE1	-2.08821	-0.639896	0.0355191	0.455692	1	1
TNIP2	-2.08758	-0.532678	0.0277675	0.373437	1	1
LTN1	-2.08273	-0.725938	0.0438756	0.542226	1	1
NSF	-2.07696	-0.70307	0.0421778	0.524883	1	1
SLU7	-2.07537	-0.617245	0.0347239	0.448393	1	1
POP5	-2.06929	-0.469037	0.0250042	0.341425	1	1
HRK	-2.0689	-0.2657	0.0156325	0.232312	1	1
PSMD6	-2.06687	-0.754036	0.0485591	0.588285	1	1
C14orf37	-2.06681	-0.535529	0.0293254	0.389497	1	1
ARPC2	-2.06447	-0.689032	0.0420275	0.523744	1	1
POP4	-2.06196	-0.689521	0.0423188	0.52627	1	1
IFI27L2	-2.06169	-0.495019	0.0270226	0.365261	1	1
HCN3	-2.05388	-0.425112	0.0234087	0.322852	1	1
KPNA2	-2.05359	-0.613913	0.0362348	0.463207	1	1
PNPT1	-2.04683	-0.764771	0.0521328	0.621447	1	1
CHURC1-FNTB	-2.04559	-0.37271	0.0211384	0.297758	1	1
USP14	-2.04466	-0.701543	0.0452819	0.557674	1	1
CDV3	-2.04108	-0.764871	0.0528407	0.628206	1	1
SKIV2L2	-2.03917	-0.591877	0.0356035	0.456447	1	1
TAF1	-2.03389	-0.706791	0.0469869	0.573916	1	1
MCM3AP	-2.03251	-0.595113	0.0364264	0.464658	1	1
MED12L	-2.03152	-0.748141	0.051974	0.619969	1	1
CKAP5	-2.03114	-0.701824	0.0467476	0.571776	1	1
HNRNPA2B1	-2.02803	-0.589612	0.0363406	0.46409	1	1
DNAJC11	-2.0239	-0.598191	0.0374221	0.475997	1	1
VDAC3	-2.02278	-0.49741	0.0297281	0.393571	0.271313	1
DZIP3	-2.01965	-0.701494	0.0479664	0.58252	1	1
TRA2A	-2.01716	-0.286594	0.0184967	0.267087	1	1
BMP2K	-2.01704	-0.319297	0.0199566	0.283801	0.651887	1
WBP11	-2.01555	-0.730162	0.0517331	0.617922	1	1
CNOT11	-2.01478	-0.375969	0.0228713	0.317156	1	1
CDK5R2	-2.0144	-0.648017	0.0429151	0.532942	1	1
COG7	-2.01181	-0.486455	0.0297293	0.393571	1	1
PAX2	-2.01179	-0.47388	0.0288794	0.385195	1	1
PRSS38	-2.00754	-0.441093	0.0270366	0.365261	1	1
BNIPL	-2.00693	-0.436591	0.0267944	0.362813	1	1
ST6GALNAC1	-2.00395	-0.454602	0.0281262	0.37684	1	1
GTPBP4	-2.00213	-0.361237	0.0227615	0.31588	1	1
MED23	-2.00091	-0.475803	0.0297464	0.393571	1	1
HNF1A	-1.99869	-0.63441	0.0431233	0.534412	1	1
RUNX1	-1.9954	-0.686888	0.0490454	0.592967	1	1
MRPS34	-1.99425	-0.481184	0.0305853	0.402826	1	1
FAM60A	-1.99258	-0.490391	0.0313639	0.410957	1	1
STK11	-1.99007	-0.602322	0.0408497	0.511209	1	1
FBRS	-1.98502	-0.751514	0.0583115	0.681882	1	1
GART	-1.98454	-0.492336	0.0320958	0.419007	1	1
RXRG	-1.98077	-0.675822	0.0494507	0.597089	1	1
TMEM41A	-1.97683	-0.552632	0.0375532	0.476984	1	1
IMPDH2	-1.97574	-0.793791	0.0656739	0.748825	1	1
MND1	-1.97397	-0.558295	0.0382998	0.484398	1	1
SRSF6	-1.97129	-0.492748	0.0331245	0.429294	1	1
C11orf57	-1.96835	-0.646758	0.0475878	0.579247	1	1
RPS16	-1.9575	-0.508706	0.0354799	0.455609	1	1
ABHD13	-1.95653	-0.404568	0.0279567	0.375415	1	1
DNAJA2	-1.95461	-0.562706	0.0404602	0.506691	1	1
SCN1A	-1.95343	-0.420278	0.0291985	0.388291	1	1
HOXA5	-1.95218	-0.408515	0.0284977	0.380828	1	1
GDF7	-1.94239	-0.463176	0.0330732	0.428942	1	1
DENR	-1.94197	-0.613577	0.0468469	0.572598	1	1
CDC5L	-1.93728	-0.540649	0.0400209	0.502601	1	1
RANBP1	-1.93619	-0.650136	0.0516538	0.617388	1	1
negConGene158	-1.9357	-0.635232	0.0499647	0.602041	1	1
PAFAH1B3	-1.92915	-0.702394	0.0592264	0.692126	1	1
SPTY2D1	-1.92831	-0.623378	0.0494533	0.597089	1	1
JTB	-1.92785	-0.672497	0.0554452	0.654804	1	1
HERPUD2	-1.9253	-0.116162	0.0154191	0.229907	0.689204	1
CTPS1	-1.92484	-0.610061	0.0483422	0.586055	1	1
KCNJ9	-1.92067	-0.497808	0.0376691	0.477776	1	1
RPL37A	-1.91869	-0.71497	0.0624576	0.721379	1	1
HDAC3	-1.91735	-0.422418	0.0318939	0.416677	1	1
CCT7	-1.91439	-0.763405	0.0705346	0.789624	1	1
C16orf62	-1.91346	-0.618833	0.050643	0.608159	1	1
PSMD14	-1.90844	-0.784182	0.075017	0.831434	1	1
COQ4	-1.90691	-0.672035	0.0581269	0.680168	1	1
NME6	-1.90598	-0.511576	0.0402273	0.504451	1	1
SNAPC3	-1.90547	-0.612654	0.0508541	0.610283	1	1
UBE2S	-1.90406	-0.420025	0.0327072	0.424504	1	1
KCNA4	-1.90354	-0.502098	0.0395784	0.498096	1	1
GOLGA7	-1.90046	-0.535554	0.0430615	0.534343	1	1
FOXA3	-1.89957	-0.256663	0.022656	0.314906	1	1
PGS1	-1.89949	-0.694636	0.0622949	0.720431	1	1
CARD6	-1.89944	-0.561501	0.0458264	0.562338	1	1
IL11	-1.89848	-0.478275	0.0379011	0.480377	1	1
PRKAG2	-1.89704	-0.700248	0.0634641	0.729694	1	1
CDYL2	-1.89346	-0.469625	0.037585	0.477049	1	1
USP5	-1.89213	-0.34262	0.0281156	0.37684	1	1
EHMT2	-1.88914	-0.447858	0.0361011	0.462162	1	1
WDR36	-1.88785	-0.869128	0.0956817	0.995503	1	1
LRP2BP	-1.8878	-0.482893	0.0392638	0.495185	1	1
CHD1	-1.88778	-0.504775	0.0412994	0.515751	1	1
ZC3H12D	-1.88777	-0.434595	0.0351233	0.452567	1	1
MEAF6	-1.88653	-0.76719	0.075873	0.838316	1	1
SPP1	-1.88613	-0.71598	0.0674857	0.76314	1	1
AQP7	-1.88231	-0.247848	0.0231028	0.319622	1	1
ADRB1	-1.87584	-0.634734	0.0572978	0.672674	1	1
ZNF286B	-1.86965	-0.413662	0.0348953	0.450281	1	1
C4orf46	-1.86747	-0.490357	0.0418654	0.522088	1	1
DDRGK1	-1.86547	-0.587547	0.0526327	0.626987	1	1
TMEM147	-1.85826	-0.650231	0.0618402	0.716101	1	1
SUMO3	-1.85208	-0.442087	0.0388053	0.490442	1	1
CDC27	-1.85123	-0.457109	0.0402531	0.504451	1	1
RPN2	-1.84609	-0.665104	0.0658192	0.749524	1	1
ACD	-1.84427	-0.828874	0.0964164	1	1	1
USP18	-1.84376	-0.648997	0.0637612	0.731694	1	1
CMC4	-1.84327	-0.335645	0.0309723	0.407022	1	1
POLR1A	-1.84311	-0.521168	0.0475493	0.579247	1	1
ZNF17	-1.84214	-0.467389	0.0420936	0.524201	1	1
ZBTB14	-1.84094	-0.7287	0.0771248	0.848468	1	1
TRIM16L	-1.83572	-0.493895	0.0454168	0.558335	1	1
C1QTNF8	-1.83337	-0.633234	0.0629764	0.725959	1	1
aavs1Gene93	-1.83315	-0.536128	0.0503638	0.60632	1	1
FSTL1	-1.83131	-0.100742	0.0184967	0.267087	0.633497	1
BANF1	-1.83098	-0.36762	0.0343065	0.443646	1	1
ZNF334	-1.83094	-0.473332	0.0437928	0.54158	1	1
TACR3	-1.82936	-0.537741	0.0509958	0.611572	1	1
PCGF5	-1.82722	-0.381987	0.035773	0.45829	1	1
MSI2	-1.82722	-0.514906	0.0486178	0.588595	1	1
RPL14	-1.82616	-0.504848	0.0476182	0.579247	1	1
FSIP2	-1.82579	-0.274958	0.0280296	0.376112	0.32321	1
negConGene101	-1.8254	-0.664756	0.0689811	0.776603	1	1
COMMD2	-1.82466	-0.714714	0.077534	0.851394	1	1
UBE2Z	-1.82389	-0.621992	0.0627201	0.723471	1	1
APIP	-1.82365	-0.452558	0.0424513	0.52755	1	1
FAM228A	-1.81843	-0.457377	0.0434457	0.537979	1	1
TAPT1	-1.81751	-0.555535	0.0546045	0.646159	1	1
SRPRB	-1.81519	-0.576738	0.0576492	0.675465	0.837107	1
EPC2	-1.81508	-0.70279	0.0771158	0.848468	1	1
LRRN2	-1.81455	-0.492163	0.0475005	0.579247	1	1
PIK3C3	-1.81388	-0.517069	0.0503878	0.60632	1	1
SCFD1	-1.80876	-0.62232	0.0649974	0.74206	1	1
REEP4	-1.80872	-0.51301	0.0505165	0.607458	1	1
CNOT10	-1.80706	-0.589687	0.0605216	0.704492	1	1
NDUFA11	-1.80137	-0.531286	0.053593	0.635877	1	1
PSMG1	-1.80079	-0.400198	0.0396567	0.49873	1	1
HDAC7	-1.7999	-0.439103	0.0434716	0.537979	1	1
SEC61A1	-1.79922	-0.660821	0.0726117	0.809303	1	1
LTV1	-1.79695	-0.620994	0.0665869	0.756816	1	1
C5orf51	-1.79494	-0.53656	0.0550589	0.651105	1	1
SUPT16H	-1.79326	-0.540809	0.0558171	0.658577	1	1
SLC4A1AP	-1.79252	-0.47075	0.0475686	0.579247	1	1
GTPBP6	-1.79163	-0.518308	0.0531939	0.631562	1	1
INTS7	-1.78832	-0.677317	0.0773454	0.85037	1	1
PIAS1	-1.78714	-0.613885	0.0670036	0.759616	1	1
IFNA14	-1.78695	-0.468967	0.0479853	0.58252	1	1
NCAPD3	-1.78668	-0.436094	0.044508	0.548902	1	1
SCAF8	-1.78627	-0.627416	0.069266	0.778832	1	1
MPP6	-1.78371	-0.386872	0.0400019	0.502601	1	1
GRIP1	-1.77698	-0.509077	0.0538636	0.638239	1	1
C14orf166	-1.77286	-0.454223	0.047913	0.582435	1	1
SIK2	-1.77261	-0.378226	0.0402285	0.504451	1	1
PEX5	-1.7666	-0.37987	0.0409463	0.511699	1	1
ATP5C1	-1.76639	-0.56267	0.0624578	0.721379	1	1
PEX12	-1.7655	-0.359554	0.0391692	0.494644	1	1
RALBP1	-1.76431	-0.477953	0.0516176	0.617369	1	1
GPRIN3	-1.76391	-0.411237	0.0442942	0.546642	1	1
GPI	-1.76278	-0.71416	0.089309	0.950425	1	1
SNRPA1	-1.76195	-0.509666	0.0558385	0.658577	1	1
MTA3	-1.76134	-0.514898	0.0565964	0.665504	1	1
C1QTNF2	-1.75684	-0.462135	0.050634	0.608159	1	1
ARID2	-1.75366	-0.594804	0.0692664	0.778832	1	1
BRD8	-1.75302	-0.530495	0.0598062	0.697531	1	1
PRR36	-1.74852	-0.406104	0.0453552	0.558192	1	1
IL4I1	-1.74811	-0.607545	0.0722494	0.805769	1	1
GLE1	-1.74665	-0.683193	0.0863067	0.927173	1	1
ATP6V1D	-1.74636	-0.555343	0.0643141	0.736618	1	1
ZDHHC4	-1.74573	-0.539642	0.0621174	0.718845	0.636418	1
CRTC3	-1.74386	-0.48838	0.0554287	0.654804	1	1
ZNF613	-1.74243	-0.516662	0.0593615	0.693251	1	1
COL10A1	-1.73998	-0.396185	0.0452112	0.557189	1	1
G2E3	-1.73911	-0.557481	0.065722	0.748895	1	1
SDHAF2	-1.73873	-0.594991	0.0717234	0.801406	1	1
CIR1	-1.73732	-0.600954	0.0729518	0.81207	1	1
JADE2	-1.73624	-0.632834	0.0787129	0.861687	1	1
WDR83OS	-1.73509	-0.626768	0.0778253	0.853017	1	1
SLC7A4	-1.7344	-0.407768	0.0470373	0.574139	1	1
ARF5	-1.73299	-0.536975	0.063578	0.730532	1	1
DHX36	-1.73045	-0.748217	0.104077	1	1	1
SLC5A6	-1.72993	-0.198767	0.0293329	0.389497	1	1
CCDC137	-1.72825	-0.553182	0.0667235	0.757403	1	1
FBXL4	-1.7281	-0.300152	0.0372293	0.47456	1	1
MED13L	-1.72759	-0.584247	0.0717888	0.801634	1	1
HOXC12	-1.72568	-0.436323	0.0512626	0.613535	1	1
EDEM2	-1.72514	-0.530267	0.0637457	0.731694	1	1
MMACHC	-1.72209	-0.719326	0.0992652	1	1	1
SSMEM1	-1.72128	-0.546845	0.066821	0.758027	1	1
PSMG2	-1.71913	-0.50617	0.0611406	0.709844	1	1
CPA5	-1.718	-0.557052	0.068932	0.776541	1	1
FIS1	-1.71639	-0.660174	0.0877581	0.938243	1	1
CPSF6	-1.71632	-0.693563	0.0947941	0.988859	1	1
PSMD12	-1.71624	-0.690012	0.0940393	0.982427	1	1
TRIQK	-1.71435	-0.68335	0.0930113	0.976263	1	1
ZIC2	-1.70756	-0.540233	0.0679256	0.767628	1	1
UBR3	-1.70563	-0.707107	0.10024	1	1	1
CPSF4	-1.70196	-0.504556	0.0633746	0.729352	1	1
FOLR3	-1.7004	-0.193716	0.0310399	0.407611	1	1
NHEJ1	-1.69643	-0.60648	0.0811927	0.882333	1	1
TMEM126A	-1.69565	-0.636791	0.0872259	0.934258	1	1
AAGAB	-1.69528	-0.618189	0.0836346	0.902819	1	1
SH3RF1	-1.69475	-0.6537	0.0908807	0.962177	1	1
PAK1IP1	-1.69411	-0.403228	0.0510823	0.612198	1	1
DIRC2	-1.69336	-0.149863	0.0285092	0.380828	0.236155	1
PPIA	-1.69335	-0.453433	0.0574553	0.674079	1	1
CREB3L4	-1.69152	-0.289456	0.0395218	0.498087	1	1
INTS6	-1.69056	-0.57389	0.076342	0.840894	1	1
MOK	-1.69015	-0.421104	0.0537211	0.636974	1	1
HSPA4	-1.68938	-0.474801	0.0609132	0.707665	1	1
CLASP2	-1.68763	-0.501075	0.0649794	0.74206	1	1
PKD1L1	-1.68433	-0.501981	0.0656124	0.748602	1	1
OIT3	-1.68396	-0.296652	0.0408913	0.51137	1	1
TSG101	-1.68046	-0.557992	0.0753277	0.832807	1	1
RHBDF2	-1.6786	-0.528159	0.0706234	0.790104	1	1
PRG2	-1.67835	-0.432025	0.0566124	0.665504	1	1
GEMIN4	-1.67807	-0.637328	0.090945	0.962177	1	1
aavs1Gene130	-1.67402	-0.46255	0.0613517	0.710906	0.302315	1
CUL2	-1.67371	-0.582221	0.0809046	0.881351	1	1
PSG7	-1.67337	-0.371395	0.0497916	0.600361	1	1
THOC7	-1.66763	-0.383119	0.0518379	0.618759	1	1
MPZL2	-1.66612	-0.423812	0.0571389	0.67125	1	1
MTG1	-1.66357	-0.604676	0.0872177	0.934258	1	1
MGEA5	-1.66208	-0.655799	0.0984637	1	1	1
FANCI	-1.66048	-0.637682	0.0947855	0.988859	1	1
MRPL15	-1.66042	-0.489748	0.0674042	0.762702	1	1
SSR3	-1.65885	-0.548302	0.0774273	0.850746	1	1
ZNF827	-1.65704	-0.251356	0.0391932	0.494644	1	1
DDX21	-1.65349	-0.562898	0.0810715	0.88222	1	1
ATP5A1	-1.65174	-0.734628	0.120929	1	1	1
RNPEPL1	-1.64782	-0.484722	0.0685911	0.774168	1	1
FMR1NB	-1.6464	-0.457337	0.0646042	0.739465	1	1
LMNB1	-1.63867	-0.648332	0.102149	1	1	1
ARHGAP26	-1.63598	-0.478781	0.0695305	0.780817	1	1
FAM135B	-1.63597	-0.416861	0.0602799	0.702137	1	1
RBM6	-1.63482	-0.511031	0.075099	0.831634	1	1
KAT8	-1.63304	-0.671705	0.109211	1	1	1
TMEM51	-1.63286	-0.303303	0.0467215	0.571776	0.933636	1
negConGene38	-1.62959	-0.589879	0.0911618	0.962515	1	1
NANS	-1.62786	-0.753164	0.133346	1	1	1
DNAJC16	-1.62709	-0.388634	0.0576492	0.675465	1	1
UPF3B	-1.62691	-0.579856	0.0896317	0.953132	1	1
ZNF131	-1.62676	-0.509598	0.0762559	0.840888	1	1
NUBPL	-1.62567	-0.53646	0.08133	0.88275	1	1
MALSU1	-1.62547	-0.616836	0.0979312	1	1	1
ZNHIT1	-1.6245	-0.494394	0.0740124	0.821321	1	1
WDR26	-1.6243	-0.574711	0.0891103	0.949286	1	1
GJB3	-1.62392	-0.660694	0.108737	1	1	1
SET	-1.62317	-0.574622	0.0893239	0.950425	1	1
METAP2	-1.62008	-0.5887	0.092929	0.975973	1	1
PMPCA	-1.61628	-0.480419	0.0730367	0.81207	1	1
YRDC	-1.61605	-0.729617	0.129788	1	1	1
NOL8	-1.61526	-0.481052	0.0733168	0.814616	1	1
COQ10B	-1.6138	-0.680458	0.116489	1	1	1
TES	-1.60852	-0.522567	0.0819434	0.888326	1	1
DHX16	-1.60846	-0.540292	0.0853743	0.918263	1	1
SNRPD2	-1.60817	-0.564599	0.090355	0.959108	1	1
MRPS14	-1.60799	-0.696573	0.122525	1	1	1
FOXF1	-1.60627	-0.418634	0.0648173	0.741428	1	1
MLST8	-1.60011	-0.619601	0.104489	1	1	1
VPS13B	-1.59772	-0.321386	0.0528251	0.628206	1	1
THSD4	-1.59571	-0.45453	0.0721463	0.805122	1	1
UBE2D3	-1.59353	-0.667789	0.118548	1	1	1
FOXRED1	-1.59217	-0.703299	0.12906	1	1	1
AMD1	-1.59181	-0.399769	0.0641633	0.735835	1	1
MRPS17	-1.59076	-0.414158	0.0664879	0.756172	1	1
WDR24	-1.59047	-0.489374	0.0791324	0.865067	1	1
RBP7	-1.58926	-0.374126	0.0608344	0.70721	1	1
PLA2G4A	-1.58915	-0.365137	0.0596014	0.695597	1	1
LYPD3	-1.58759	-0.589323	0.100299	1	1	1
URB2	-1.58639	-0.633643	0.111393	1	1	1
EBF3	-1.5856	-0.373532	0.0612666	0.710382	1	1
ADGRL3	-1.58476	-0.393103	0.064219	0.736001	1	1
CHD2	-1.58436	-0.586963	0.100502	1	1	1
GXYLT1	-1.58303	-0.506234	0.0836914	0.902885	1	1
PDCD6	-1.58278	-0.665975	0.121014	1	1	1
VWA9	-1.58263	-0.445838	0.07288	0.811786	1	1
NEK3	-1.58249	-0.334863	0.0564419	0.664814	1	1
NUBP2	-1.58225	-0.62741	0.110857	1	1	1
YY1AP1	-1.57928	-0.55766	0.0950434	0.990017	1	1
IL27RA	-1.57901	-0.421665	0.0695072	0.780817	1	1
ANO2	-1.57779	-0.588282	0.102346	1	1	1
CTNND1	-1.57726	-0.246228	0.0465623	0.570292	1	1
NSUN7	-1.57575	-0.310465	0.0541897	0.641677	1	1
OPA1	-1.57202	-0.608849	0.108749	1	1	1
RPA1	-1.57034	-0.54377	0.0939664	0.98224	1	1
ALKBH1	-1.57021	-0.228506	0.0454295	0.558335	1	1
DICER1	-1.56954	-0.539312	0.093177	0.976278	1	1
POLD2	-1.56733	-0.40586	0.0688496	0.776541	1	1
MT1A	-1.56681	-0.485461	0.0828189	0.896183	1	1
HIST1H3H	-1.56614	-0.319704	0.0565969	0.665504	1	1
TM2D3	-1.56459	-0.411354	0.0701696	0.787002	1	1
PTCD3	-1.56246	-0.624939	0.115373	1	1	1
PPP1R11	-1.56149	-0.562751	0.100192	1	1	1
AZIN1	-1.55855	-0.629414	0.117623	1	1	1
C19orf52	-1.55801	-0.671355	0.129721	1	1	1
RRP9	-1.55587	-0.498193	0.0874634	0.93608	1	1
MYCBPAP	-1.55159	-0.483207	0.0853314	0.918263	1	1
PRSS16	-1.55008	-0.29915	0.0560139	0.660209	1	1
PRDM13	-1.55007	-0.260346	0.0512192	0.613427	1	1
GLRX3	-1.54988	-0.498609	0.0887637	0.946158	1	1
MROH2A	-1.54896	-0.371366	0.0663371	0.754939	1	1
SAP18	-1.54812	-0.494887	0.0883643	0.943028	1	1
JAK3	-1.54644	-0.44767	0.0795585	0.867747	1	1
RPS17	-1.5457	-0.709126	0.145589	1	1	1
PPP5C	-1.54262	-0.398356	0.0716355	0.800926	1	1
ZNF681	-1.53939	-0.456805	0.0825825	0.894269	1	1
CHRND	-1.53905	-0.367175	0.0672177	0.761495	1	1
EXOC2	-1.53551	-0.471326	0.0861619	0.926176	1	1
FGF11	-1.53208	-0.503413	0.0935132	0.978077	0.441527	1
RASL10B	-1.53053	-0.442579	0.081568	0.884794	1	1
ESR2	-1.52885	-0.377787	0.0705214	0.789624	1	1
VCP	-1.52868	-0.677167	0.140661	1	1	1
MAEA	-1.52561	-0.594335	0.117046	1	1	1
PHLPP1	-1.52525	-0.447397	0.0834881	0.901783	1	1
NUP188	-1.52406	-0.545369	0.10493	1	1	1
PITX2	-1.52283	-0.399215	0.0751283	0.831634	1	1
KCNK18	-1.52117	-0.403733	0.0762067	0.840888	1	1
CAAP1	-1.52082	-0.51691	0.0990034	1	1	1
UBTD1	-1.52002	-0.425014	0.0802509	0.874764	1	1
LAMTOR1	-1.5182	-0.478398	0.0911436	0.962515	1	1
FIBCD1	-1.51757	-0.548762	0.107346	1	1	1
SRBD1	-1.51555	-0.657296	0.138496	1	1	1
TRUB1	-1.51548	-0.461351	0.0881811	0.941637	1	1
C1orf27	-1.51545	-0.515033	0.0998035	1	1	1
TPTE2	-1.51388	-0.196803	0.0480866	0.583353	1	1
COG5	-1.51353	-0.444908	0.0852842	0.918263	1	1
C9orf57	-1.51093	-0.402212	0.0777541	0.852761	1	1
LINGO2	-1.50707	-0.427139	0.0830896	0.898566	1	1
CACNG7	-1.50664	-0.529936	0.105412	1	1	1
CENPJ	-1.50643	-0.345434	0.0689247	0.776541	1	1
EXOC8	-1.50397	-0.440932	0.0863884	0.927492	1	1
YARS	-1.50315	-0.473414	0.0932826	0.976811	1	1
RETSAT	-1.50266	-0.492021	0.0974789	1	1	1
INSIG1	-1.50018	-0.395107	0.0784104	0.858902	1	1
FAM83A	-1.49745	-0.438358	0.0871785	0.934258	1	1
TMED4	-1.49401	-0.507636	0.103088	1	1	1
BARHL1	-1.49389	-0.461603	0.0927355	0.975665	1	1
MANSC1	-1.4935	-0.277695	0.0607408	0.706583	1	1
SPTLC1	-1.49116	-0.660032	0.147427	1	1	1
RER1	-1.48907	-0.52973	0.109714	1	1	1
LMO7	-1.48871	-0.26834	0.0601043	0.700548	1	1
EXOSC10	-1.48753	-0.336553	0.0705362	0.789624	1	1
SFSWAP	-1.48688	-0.446241	0.0909679	0.962177	1	1
MYL1	-1.48372	-0.485074	0.100212	1	1	1
SLC7A1	-1.48224	-0.538401	0.113706	1	1	1
PIGH	-1.4819	-0.544497	0.115404	1	1	1
TCERG1	-1.4798	-0.447151	0.0926587	0.975433	1	1
SMCO4	-1.47977	-0.481681	0.100342	1	1	1
FAAP20	-1.47975	-0.500639	0.104828	1	1	1
LDLR	-1.47854	-0.388954	0.0812605	0.882533	1	1
SLC1A5	-1.47822	-0.552981	0.118685	1	1	1
CCDC154	-1.47808	-0.556843	0.119786	1	1	1
DHX38	-1.47728	-0.264762	0.0612025	0.710101	1	1
CMC2	-1.47436	-0.45172	0.0948213	0.988859	1	1
GTPBP1	-1.47343	-0.195987	0.0526902	0.627253	1	1
CDCA3	-1.4706	-0.664203	0.156072	1	1	1
KIAA0930	-1.47009	-0.485529	0.103519	1	1	1
SOX8	-1.46993	-0.344787	0.0748647	0.830262	0.0265076	1
PSMB1	-1.46943	-0.548419	0.119847	1	1	1
TRIP13	-1.46485	-0.346652	0.0760731	0.840007	1	1
FAM45A	-1.46452	-0.496427	0.107523	1	1	1
TANGO6	-1.46281	-0.450485	0.0971026	1	1	1
negConGene134	-1.46243	-0.392204	0.0849702	0.915573	1	1
HOXD9	-1.45499	-0.450167	0.0987961	1	1	1
SELM	-1.45432	-0.455892	0.100262	1	1	1
CDYL	-1.45401	-0.480383	0.10616	1	1	1
LOC403312	-1.45197	-0.412112	0.0911316	0.962515	1	1
ADH4	-1.45147	-0.279837	0.0672548	0.761495	1	1
SLC1A3	-1.45105	-0.447501	0.0990867	1	1	1
HIGD2A	-1.44674	-0.553527	0.127776	1	1	1
ENO1	-1.44629	-0.627081	0.151533	1	1	1
SLC7A6	-1.44488	-0.459892	0.103416	1	1	1
NKTR	-1.44429	-0.522882	0.119738	1	1	1
TTF1	-1.44275	-0.387826	0.0880201	0.940481	1	1
COPB2	-1.44264	-0.488941	0.111151	1	1	1
FLVCR1	-1.4426	-0.697325	0.179673	1	1	1
COX5A	-1.44246	-0.511432	0.117111	1	1	1
RABIF	-1.44198	-0.567516	0.133417	1	1	1
NUDT5	-1.43747	-0.347152	0.0811233	0.88222	1	1
GTF2E2	-1.43723	-0.679224	0.174481	1	1	1
CFDP1	-1.43578	-0.505948	0.117436	1	1	1
A1CF	-1.43476	-0.573975	0.137688	1	1	1
RTTN	-1.43349	-0.496103	0.115408	1	1	1
FAM35A	-1.43327	-0.324287	0.0777064	0.852761	1	1
DMWD	-1.43172	-0.447423	0.103581	1	1	1
KCTD11	-1.43149	-0.555082	0.13282	1	1	1
LAMTOR4	-1.43025	-0.626412	0.156995	1	1	1
GORASP2	-1.42865	-0.395496	0.0925491	0.974855	1	1
FAM188A	-1.42763	-0.296441	0.0738276	0.819781	1	1
RNF17	-1.42701	-0.424324	0.0992824	1	1	1
HOXA2	-1.42372	-0.388413	0.0920919	0.971186	1	1
CBFA2T3	-1.42365	-0.480752	0.113951	1	0.215742	1
TMTC4	-1.42328	-0.525908	0.126555	1	1	1
RPAIN	-1.4225	-0.646688	0.167467	1	1	1
EN1	-1.42205	-0.600518	0.150724	1	1	1
TMEM116	-1.42191	-0.426141	0.100879	1	1	1
IPMK	-1.42103	-0.603694	0.152187	1	1	1
GGN	-1.42061	-0.218306	0.0626626	0.723276	1	1
CEP63	-1.41988	-0.430789	0.102443	1	1	1
HCFC1	-1.41903	-0.375889	0.0904433	0.959473	1	1
CHN1	-1.41855	-0.430308	0.102644	1	1	1
METTL16	-1.41482	-0.297884	0.0762943	0.840888	1	1
ERN2	-1.41447	-0.439916	0.105934	1	1	1
PRPF38A	-1.41144	-0.715369	0.201241	1	1	1
NUSAP1	-1.41108	-0.396606	0.0966222	1	1	1
IL12RB1	-1.40907	-0.477317	0.116917	1	1	1
BRD9	-1.40829	-0.505547	0.125	1	1	1
COL7A1	-1.40791	-0.551035	0.138935	1	1	1
SEC13	-1.40706	-0.572666	0.14632	1	1	1
COMMD6	-1.39744	-0.379233	0.0957935	0.996084	0.459166	1
COMMD8	-1.39687	-0.603549	0.160844	1	1	1
CLCN2	-1.39595	-0.492626	0.124833	1	1	1
KRTAP13-4	-1.39374	-0.379105	0.0965857	1	1	1
SLC24A1	-1.39154	-0.389801	0.0994996	1	1	1
UBE3D	-1.39141	-0.564191	0.148762	1	1	1
RASGRF1	-1.39047	-0.594741	0.159955	1	1	1
ZFX	-1.38997	-0.351554	0.0914349	0.964827	1	1
NIPBL	-1.38838	-0.560685	0.148598	1	1	1
HP	-1.3882	-0.449013	0.114932	1	1	1
FAM53B	-1.38661	-0.486539	0.125773	1	1	1
GTF3C5	-1.38633	-0.263373	0.0752434	0.832392	0.830412	1
TFAM	-1.38615	-0.355428	0.0930709	0.976278	1	1
SPAG7	-1.38549	-0.487264	0.126308	1	1	1
ARFGAP1	-1.38179	-0.471409	0.122818	1	1	1
CENPN	-1.38177	-0.453559	0.117874	1	1	1
RPS26	-1.38004	-0.490893	0.128977	1	1	1
PKDREJ	-1.37825	-0.449883	0.117832	1	1	1
GATAD1	-1.3769	-0.213068	0.0684761	0.77336	0.713615	1
MBTD1	-1.37503	-0.604218	0.169407	1	1	1
FAM198A	-1.37348	-0.442542	0.117136	1	1	1
SLC39A10	-1.37299	-0.58517	0.162896	1	1	1
VMA21	-1.37251	-0.43897	0.116435	1	1	1
FOXM1	-1.37216	-0.530569	0.143916	1	1	1
POLR3H	-1.37103	-0.628282	0.180722	1	1	1
PLXND1	-1.37078	-0.133327	0.0577825	0.676583	0.148413	1
PRKAR1A	-1.37062	-0.378072	0.101632	1	1	1
ZAK	-1.36836	-0.338996	0.0933627	0.977076	1	1
CEP295	-1.36741	-0.55815	0.155047	1	1	1
RTN1	-1.36738	-0.573533	0.16065	1	1	1
CAPRIN1	-1.36622	-0.566372	0.158444	1	1	1
PRRC1	-1.36463	-0.330667	0.0923767	0.973614	1	1
TMEM133	-1.36441	-0.355798	0.0979369	1	1	1
SERPINE1	-1.36368	-0.609031	0.175834	1	1	1
PTCD2	-1.36269	-0.385198	0.105219	1	1	1
SLC35F3	-1.36183	-0.440518	0.119763	1	1	1
YIPF5	-1.36127	-0.347485	0.0967751	1	1	1
SH2B2	-1.36105	-0.329263	0.0928428	0.975973	1	1
MIS12	-1.35982	-0.520451	0.144653	1	1	1
ERCC3	-1.35656	-0.348673	0.0981007	1	1	1
ATMIN	-1.35599	-0.55283	0.157241	1	1	1
RABAC1	-1.35374	-0.542097	0.154199	1	1	1
POLDIP3	-1.35288	-0.252239	0.0792157	0.865067	1	1
DBN1	-1.35285	-0.165494	0.0648602	0.741443	1	1
ERCC6L	-1.35227	-0.33103	0.0951275	0.990315	1	1
NACC1	-1.35156	-0.31019	0.0908129	0.962177	1	1
WRAP53	-1.35131	-0.580656	0.169469	1	1	1
EVA1B	-1.35079	-0.338595	0.09713	1	1	1
HEBP2	-1.35055	-0.410411	0.114679	1	1	1
GUK1	-1.35049	-0.467703	0.130881	1	1	1
SPOCK2	-1.34817	-0.248025	0.079307	0.865534	0.766528	1
DDX55	-1.34763	-0.491482	0.139167	1	1	1
CHST6	-1.34697	-0.454366	0.127954	1	1	1
RDH11	-1.34424	-0.360209	0.103645	1	1	1
CNOT6L	-1.34344	-0.394943	0.112492	1	1	1
ASUN	-1.34247	-0.504032	0.144964	1	1	1
SLC39A7	-1.34219	-0.588423	0.176194	1	1	1
PLEKHG5	-1.34155	-0.259008	0.0825919	0.894269	1	1
SNRPD3	-1.33895	-0.552908	0.163567	1	1	1
RRP7A	-1.33814	-0.574366	0.172177	1	1	1
KRTAP13-1	-1.33784	-0.548533	0.162341	1	1	1
ZNF397	-1.3337	-0.27622	0.0875033	0.93608	1	1
NMT1	-1.33343	-0.547605	0.163649	1	1	1
MIPEP	-1.3316	-0.576941	0.17583	1	1	1
HNRNPUL2	-1.32985	-0.359542	0.106977	1	1	1
DNAH11	-1.32853	-0.192703	0.0730422	0.81207	0.819123	1
CXXC1	-1.32845	-0.523036	0.156426	1	1	1
LOXL3	-1.32795	-0.461724	0.135975	1	1	1
OSBP	-1.3276	-0.416278	0.122552	1	1	1
SLC29A2	-1.32729	-0.296895	0.0931398	0.976278	1	1
FANCA	-1.32697	-0.556813	0.169665	1	1	1
STT3B	-1.32588	-0.408622	0.120889	1	1	1
RFXAP	-1.32498	-0.413207	0.122427	1	1	1
MOBP	-1.32328	-0.281632	0.0907565	0.962177	1	1
DAXX	-1.32306	-0.512501	0.154581	1	1	1
KRT20	-1.32141	-0.311212	0.0975798	1	1	1
CKAP2L	-1.32085	-0.413593	0.123706	1	1	1
APEX1	-1.32026	-0.526376	0.160639	1	1	1
CAND2	-1.31993	-0.523377	0.159652	1	1	1
CDCA4	-1.31833	-0.418708	0.125902	1	1	1
TMEM30A	-1.31764	-0.362908	0.110887	1	1	1
DIABLO	-1.31312	-0.517325	0.159932	1	1	1
RPIA	-1.31273	-0.607519	0.197046	1	1	1
RGS22	-1.31211	-0.463907	0.14174	1	1	1
SOS1	-1.31164	-0.493072	0.151756	1	1	1
ATG9A	-1.31139	-0.210744	0.0792157	0.865067	1	1
PCMTD2	-1.3109	-0.424511	0.129801	1	1	1
CRTC2	-1.31001	-0.419386	0.12854	1	1	1
TBPL2	-1.30841	-0.378792	0.117492	1	1	1
NAA10	-1.30802	-0.595866	0.19392	1	1	1
TRAPPC11	-1.30653	-0.56627	0.18176	1	1	1
WDR64	-1.30611	-0.458128	0.141812	1	1	1
RBM18	-1.30302	-0.39171	0.122557	1	1	1
SLC17A5	-1.30147	-0.126169	0.0666877	0.757403	1	1
TMEM92	-1.29861	-0.372747	0.118514	1	1	1
VWA7	-1.2975	-0.265882	0.0928783	0.975973	0.890843	1
TCTEX1D1	-1.2974	-0.387813	0.123043	1	1	1
AVPI1	-1.29734	-0.39488	0.125082	1	1	1
HEATR9	-1.29708	-0.419425	0.13244	1	1	1
ATP6AP2	-1.29619	-0.31248	0.103722	1	0.82824	1
BTN1A1	-1.29606	-0.52042	0.167535	1	1	1
MEP1B	-1.295	-0.371547	0.119173	1	1	1
DOT1L	-1.29437	-0.454043	0.144337	1	1	1
GLI1	-1.29203	-0.309556	0.104017	1	1	1
TPCN1	-1.29122	-0.427516	0.136766	1	1	1
FANCG	-1.2912	-0.61817	0.21221	1	1	1
TGM1	-1.28963	-0.41043	0.13197	1	1	1
NFYC	-1.28939	-0.469503	0.151296	1	1	1
aavs1Gene89	-1.28903	-0.360359	0.11775	1	1	1
RPH3A	-1.28901	-0.198744	0.0811328	0.88222	1	1
DIS3L2	-1.28855	-0.344863	0.113745	1	1	1
SSBP1	-1.28488	-0.478982	0.15625	1	1	1
RYBP	-1.28419	-0.37251	0.122452	1	1	1
CD36	-1.28329	-0.127861	0.0698143	0.783511	1	1
TMEM213	-1.28103	-0.488661	0.161199	1	1	1
CCDC77	-1.27972	-0.48241	0.159373	1	1	1
SHISA2	-1.27965	-0.377176	0.125078	1	1	1
GPR31	-1.27888	-0.362945	0.121257	1	0.416451	1
PRPF39	-1.27886	-0.361512	0.120863	1	1	1
FAHD2B	-1.27813	-0.397191	0.13144	1	1	1
SMC6	-1.2772	-0.509933	0.170795	1	1	1
RSPH14	-1.27679	-0.453374	0.150071	1	1	1
SF3A3	-1.27619	-0.456498	0.151362	1	1	1
LDHD	-1.27606	-0.495131	0.165505	1	1	1
RAB33A	-1.27581	-0.376491	0.125991	1	1	1
FAM69A	-1.27494	-0.583792	0.203534	1	1	1
MYBL2	-1.27285	-0.499318	0.16835	1	1	1
ZNF773	-1.27243	-0.567398	0.197128	1	1	1
NKPD1	-1.26964	-0.452432	0.152233	1	1	1
TUBB1	-1.26934	-0.419488	0.141202	1	1	1
CXCL6	-1.26932	-0.296373	0.106328	1	0.402472	1
CHST11	-1.26841	-0.526367	0.181016	1	1	1
CXorf38	-1.26756	-0.498998	0.170289	1	1	1
DCLRE1C	-1.26737	-0.374059	0.127745	1	1	1
TESC	-1.26654	-0.337414	0.117626	1	1	1
TSKU	-1.26647	-0.529755	0.18325	1	1	1
GNG12	-1.26562	-0.261091	0.0988615	1	1	1
KLHL38	-1.26499	-0.361296	0.124727	1	1	1
MUS81	-1.26282	-0.289777	0.106305	1	1	1
RFWD3	-1.26214	-0.393808	0.135315	1	1	1
TP53BP1	-1.26151	-0.360392	0.125468	1	1	1
ZNF568	-1.26052	-0.392534	0.135422	1	1	1
DPY19L4	-1.25962	-0.564064	0.201476	1	1	1
PRCC	-1.25683	-0.402894	0.139879	1	1	1
GTF2E1	-1.25617	-0.489569	0.17106	1	1	1
MEGF9	-1.25568	-0.360579	0.12722	1	1	1
PPP1R21	-1.25417	-0.401939	0.14043	1	0.380636	1
PCF11	-1.25374	-0.540923	0.193622	1	1	1
FZR1	-1.25313	-0.469497	0.164478	1	1	1
RUNDC1	-1.25018	-0.3928	0.138775	1	1	1
C16orf86	-1.25007	-0.39709	0.140189	1	1	1
PACSIN3	-1.24988	-0.346783	0.124899	1	1	1
KIF6	-1.24927	-0.316891	0.116748	1	1	1
ING3	-1.24786	-0.686354	0.27437	1	1	1
SEC61B	-1.2472	-0.532067	0.192592	1	1	1
SLC27A2	-1.24678	-0.485817	0.173293	1	1	1
KARS	-1.24675	-0.486069	0.17341	1	1	1
RGR	-1.24538	-0.186534	0.0872281	0.934258	0.327564	1
GLIPR1L2	-1.24534	-0.506495	0.182354	1	1	1
SHANK2	-1.24506	-0.435625	0.154984	1	1	1
PRR12	-1.24494	-0.538086	0.196303	1	1	1
ASB18	-1.24045	-0.270186	0.106988	1	1	1
DSC3	-1.24036	-0.316561	0.119079	1	1	1
SREK1IP1	-1.23844	-0.3113	0.118166	1	1	1
SPANXN2	-1.23811	-0.255093	0.103888	1	1	1
MRPL2	-1.23802	-0.59507	0.227435	1	1	1
aavs1Gene148	-1.2378	-0.535591	0.198412	1	1	1
AEN	-1.23709	-0.371806	0.136271	1	1	1
MEST	-1.23626	-0.384017	0.140426	1	1	1
DGAT2	-1.23582	-0.428818	0.155855	1	1	1
TSR1	-1.23562	-0.403114	0.146959	1	1	1
PPP1R14A	-1.2354	-0.426651	0.15523	1	1	1
BIRC6	-1.23438	-0.343959	0.1286	1	1	1
PSMA3	-1.23408	-0.407655	0.149035	1	1	1
MGAM	-1.23337	-0.522832	0.194643	1	1	1
C16orf74	-1.23289	-0.474641	0.174381	1	1	1
LPAR3	-1.22804	-0.426493	0.157826	1	1	1
NUP107	-1.22773	-0.248687	0.104844	1	1	1
RBPMS	-1.22501	-0.524659	0.199267	1	1	1
LRRC3B	-1.22392	-0.421227	0.157408	1	1	1
RAMP1	-1.22343	-0.298701	0.118824	1	1	1
HAUS5	-1.22136	-0.482906	0.182521	1	1	1
MIXL1	-1.22071	-0.516779	0.19763	1	1	1
TMEM163	-1.22069	-0.332608	0.129295	1	1	1
ORC6	-1.21949	-0.41	0.154962	1	1	1
C6orf1	-1.21654	-0.288474	0.117915	1	0.543117	1
EIF3H	-1.21579	-0.320513	0.12717	1	1	1
SNX4	-1.21447	-0.214963	0.100012	1	1	1
USP15	-1.21436	-0.426278	0.1628	1	1	1
DDX42	-1.21201	-0.419927	0.161304	1	1	1
TP73	-1.21174	-0.513347	0.200166	1	1	1
SNRNP70	-1.21145	-0.110811	0.0792157	0.865067	0.0505378	1
BDH1	-1.20953	-0.519473	0.204048	1	1	1
LRRN4CL	-1.20863	-0.357476	0.140778	1	1	1
PTPRK	-1.20749	-0.134541	0.0844385	0.910394	0.783294	1
PRICKLE2	-1.20684	-0.526453	0.208646	1	1	1
FAM134C	-1.20621	-0.354876	0.14072	1	1	1
POLR3F	-1.2048	-0.454334	0.177537	1	1	1
COG3	-1.2026	-0.528508	0.211691	1	1	1
ANKRD2	-1.19929	-0.522872	0.210558	1	1	1
USP6	-1.19922	-0.458749	0.181675	1	1	1
GLT1D1	-1.19911	-0.309337	0.128793	1	1	1
IFT20	-1.19895	-0.293193	0.124134	1	1	1
AKT1	-1.19827	-0.43723	0.173263	1	1	1
negConGene149	-1.19764	-0.403658	0.1606	1	1	1
GOT2	-1.19729	-0.295935	0.125401	1	1	1
BTF3L4	-1.19344	-0.44106	0.176757	1	1	1
CDKN2A	-1.19305	-0.485695	0.196076	1	1	1
KRTAP9-1	-1.193	-0.29228	0.125585	1	0.247743	1
CYP2D6	-1.19246	-0.220898	0.106667	1	1	1
DLX4	-1.19209	-0.370708	0.150774	1	1	1
CRIP1	-1.19173	-0.383068	0.155259	1	1	1
CCDC90B	-1.19115	-0.507138	0.206908	1	1	1
WDPCP	-1.19101	-0.317977	0.133858	1	1	1
THAP7	-1.18939	-0.363244	0.149128	1	1	1
ATP6V0A2	-1.18623	-0.500897	0.206279	1	1	1
HNRNPR	-1.18536	-0.541767	0.227099	1	1	1
aavs1Gene159	-1.18522	-0.500898	0.206761	1	1	1
FAM219A	-1.18511	-0.249638	0.115919	1	1	1
COX7B2	-1.18456	-0.553524	0.233767	1	1	1
RSL1D1	-1.18263	-0.461957	0.190149	1	1	1
MRM1	-1.18128	-0.387011	0.160496	1	1	1
TBPL1	-1.18102	-0.345971	0.146102	1	1	1
LARS	-1.17998	-0.599219	0.262465	1	1	1
DPF2	-1.17952	-0.52695	0.222451	1	1	1
SLC1A7	-1.17888	-0.307475	0.134359	1	1	1
TYRO3	-1.17887	-0.127294	0.0887022	0.946069	1	1
DNM2	-1.17865	-0.524007	0.221392	1	1	1
DYNC1LI1	-1.17809	-0.48236	0.201396	1	1	1
[truncated: 15,834 more rows]

## Sheet: K562_MOI=10
Gene	Fitness Score	ZLFC	RRA_depletion	RRA_depletion_FDR	RRA_enrichment	RRA_enrichment_FDR
SMC4	-8.00636	-4.00636	1.87903e-32	1.11696e-28	1	1
YAE1D1	-7.96719	-3.96719	7.40209e-27	2.20002e-23	1	1
TRNAU1AP	-7.8951	-3.8951	1.4967e-28	5.33814e-25	1	1
SARS	-7.87005	-3.87005	4.45586e-32	1.98653e-28	1	1
SF3B4	-7.85508	-3.85508	2.09099e-36	3.72887e-32	1	1
HSD17B12	-7.71355	-3.71355	1.77893e-34	1.58618e-30	1	1
DDX24	-7.69752	-3.69752	1.35661e-24	2.41925e-21	1	1
NFS1	-7.68583	-3.68583	3.22999e-22	2.6182e-19	1	1
PSMB5	-7.67367	-3.67367	2.84619e-24	4.22968e-21	1	1
EIF3G	-7.6186	-3.6186	7.54737e-22	5.85183e-19	1	1
ZFC3H1	-7.58224	-3.58224	5.48297e-23	5.4321e-20	1	1
RNF113A	-7.55667	-3.55667	7.89251e-21	4.85335e-18	1	1
RUVBL1	-7.50633	-3.50633	4.58147e-21	2.9179e-18	1	1
BCR	-7.48501	-3.48501	1.82823e-22	1.55251e-19	1	1
CIAO1	-7.46875	-3.46875	2.43384e-24	3.9457e-21	1	1
MAX	-7.42326	-3.42326	5.77796e-25	1.14487e-21	1	1
SART3	-7.41424	-3.41424	2.91873e-26	7.43569e-23	1	1
MED11	-7.40243	-3.40243	3.33547e-19	1.5653e-16	1	1
PELO	-7.40224	-3.40224	5.42464e-24	6.90983e-21	1	1
LIPT2	-7.4001	-3.4001	1.59737e-25	3.56073e-22	1	1
CDC16	-7.36883	-3.36883	5.13116e-23	5.4321e-20	1	1
PDCD7	-7.34464	-3.34464	9.73491e-24	1.15735e-20	1	1
GRWD1	-7.32023	-3.32023	4.18037e-20	2.25905e-17	1	1
CDC73	-7.2956	-3.2956	1.06719e-21	7.61247e-19	1	1
UHRF1	-7.29483	-3.29483	8.38323e-19	3.58876e-16	1	1
POLR3D	-7.28829	-3.28829	9.6435e-23	9.05119e-20	1	1
TWISTNB	-7.23674	-3.23674	4.23979e-21	2.80031e-18	1	1
GINS2	-7.23417	-3.23417	1.60281e-19	7.93968e-17	1	1
PHB2	-7.20184	-3.20184	2.15044e-17	6.61187e-15	1	1
YARS2	-7.18055	-3.18055	1.30131e-16	3.68353e-14	1	1
PDE12	-7.17698	-3.17698	3.21883e-24	4.4155e-21	1	1
EIF2B2	-7.16761	-3.16761	1.54138e-20	9.16247e-18	1	1
TUBG1	-7.15165	-3.15165	1.48815e-18	5.76916e-16	1	1
COPA	-7.14959	-3.14959	5.20879e-23	5.4321e-20	1	1
SRSF3	-7.12612	-3.12612	9.08941e-20	4.63119e-17	1	1
PES1	-7.1078	-3.1078	4.97531e-16	1.30478e-13	1	1
PPCS	-7.10665	-3.10665	2.00577e-18	7.61041e-16	1	1
LAMTOR2	-7.10044	-3.10044	1.47576e-18	5.76916e-16	1	1
MRPL33	-7.09808	-3.09808	9.87408e-22	7.33685e-19	1	1
TRAPPC1	-7.09298	-3.09298	1.21968e-18	4.94332e-16	1	1
RPL24	-7.06377	-3.06377	3.145e-18	1.1217e-15	1	1
CCDC84	-7.06355	-3.06355	2.13723e-19	1.03009e-16	1	1
SNAPC2	-7.02612	-3.02612	1.91308e-20	1.10052e-17	1	1
ISCA2	-7.01845	-3.01845	3.0176e-15	6.7266e-13	1	1
MRPL34	-7.01237	-3.01237	4.47041e-19	2.04412e-16	1	1
SCO1	-7.00241	-3.00241	1.65324e-15	3.82886e-13	1	1
ZNHIT2	-6.99931	-2.99931	3.01153e-18	1.09601e-15	1	1
PSMC2	-6.93853	-2.93853	3.62413e-17	1.09541e-14	1	1
RPS29	-6.9254	-2.9254	4.53798e-20	2.38017e-17	1	1
MRPS26	-6.91773	-2.91773	1.14858e-17	3.79309e-15	1	1
WDR77	-6.90968	-2.90968	5.18656e-15	1.10109e-12	1	1
AHCYL1	-6.90103	-2.90103	3.9351e-16	1.04738e-13	1	1
MRPS18C	-6.89269	-2.89269	2.21023e-20	1.23172e-17	1	1
RPS8	-6.8894	-2.8894	3.87207e-14	6.57624e-12	1	1
FXN	-6.86514	-2.86514	1.12605e-18	4.66996e-16	1	1
MEPCE	-6.84711	-2.84711	1.77834e-17	5.56372e-15	1	1
SF3B2	-6.83861	-2.83861	7.45025e-14	1.23019e-11	1	1
RAD1	-6.83754	-2.83754	4.14988e-17	1.22839e-14	1	1
TIMM13	-6.82583	-2.82583	5.19023e-18	1.74754e-15	1	1
ISG20L2	-6.78736	-2.78736	2.48037e-21	1.70125e-18	1	1
CLNS1A	-6.77117	-2.77117	7.06258e-17	2.0314e-14	1	1
TXNL4A	-6.75139	-2.75139	6.81812e-16	1.68871e-13	1	1
EXOSC4	-6.75002	-2.75002	3.80427e-18	1.33023e-15	1	1
HSPA9	-6.7335	-2.7335	1.42711e-14	2.79666e-12	1	1
MCM2	-6.73278	-2.73278	1.07381e-14	2.17605e-12	1	1
HEXIM1	-6.73122	-2.73122	5.19372e-18	1.74754e-15	1	1
RPL23	-6.71804	-2.71804	1.4063e-14	2.78651e-12	1	1
WDR83	-6.71297	-2.71297	1.89096e-16	5.26899e-14	1	1
SNRPE	-6.70349	-2.70349	1.0462e-15	2.48759e-13	1	1
EMC7	-6.70204	-2.70204	5.03053e-19	2.24274e-16	1	1
RPS5	-6.67115	-2.67115	6.26483e-16	1.59601e-13	1	1
RPS19	-6.64953	-2.64953	3.09844e-15	6.82155e-13	1	1
MRPL11	-6.64246	-2.64246	1.77323e-14	3.36404e-12	1	1
TRIAP1	-6.64084	-2.64084	8.56548e-16	2.06417e-13	1	1
RPS11	-6.6378	-2.6378	8.45219e-19	3.58876e-16	1	1
COX11	-6.61477	-2.61477	7.52987e-11	6.95752e-09	1	1
NAA30	-6.61329	-2.61329	1.18051e-13	1.86302e-11	1	1
MRPL18	-6.6064	-2.6064	1.52557e-17	4.94646e-15	1	1
EMG1	-6.60288	-2.60288	5.99765e-16	1.55009e-13	1	1
UTP23	-6.59849	-2.59849	3.64637e-14	6.31318e-12	1	1
POLR2A	-6.59735	-2.59735	3.11127e-14	5.4934e-12	1	1
TICRR	-6.59048	-2.59048	1.27731e-11	1.43259e-09	1	1
DHX35	-6.58733	-2.58733	8.87054e-15	1.81826e-12	1	1
WDR12	-6.57175	-2.57175	1.42606e-11	1.56018e-09	1	1
NAMPT	-6.56576	-2.56576	1.59379e-22	1.4211e-19	1	1
RPLP0	-6.56088	-2.56088	4.32962e-13	6.27725e-11	1	1
UBE2N	-6.55992	-2.55992	4.20187e-17	1.22839e-14	1	1
RPL7	-6.53891	-2.53891	5.16386e-15	1.10109e-12	1	1
TOP1	-6.53504	-2.53504	1.37236e-14	2.7498e-12	1	1
TRMT112	-6.52203	-2.52203	2.51068e-15	5.66745e-13	1	1
MYC	-6.51701	-2.51701	2.03817e-14	3.74707e-12	1	1
XPO1	-6.50583	-2.50583	3.76222e-10	2.96866e-08	1	1
CYC1	-6.50487	-2.50487	5.63692e-11	5.34698e-09	1	1
THAP1	-6.50159	-2.50159	1.98245e-14	3.6826e-12	1	1
TOE1	-6.49175	-2.49175	2.01389e-16	5.52519e-14	1	1
UQCRC1	-6.4846	-2.4846	4.33412e-11	4.20056e-09	1	1
SLC7A6OS	-6.47297	-2.47297	1.46055e-14	2.83109e-12	1	1
UPF1	-6.46732	-2.46732	2.97217e-12	3.75905e-10	1	1
TYMS	-6.46432	-2.46432	8.38137e-14	1.34653e-11	1	1
SRSF1	-6.45961	-2.45961	1.36999e-12	1.82321e-10	1	1
GTF3C1	-6.45857	-2.45857	3.76636e-11	3.75226e-09	1	1
RBX1	-6.45761	-2.45761	1.2241e-11	1.38161e-09	1	1
NOP2	-6.45641	-2.45641	2.96178e-11	3.08873e-09	1	1
PSMG3	-6.45195	-2.45195	5.39455e-13	7.63501e-11	1	1
METTL17	-6.45193	-2.45193	2.92878e-14	5.22289e-12	1	1
OIP5	-6.44991	-2.44991	7.00202e-11	6.53754e-09	1	1
RPLP2	-6.43359	-2.43359	2.61547e-12	3.33155e-10	1	1
FNTB	-6.4311	-2.4311	2.34171e-11	2.50058e-09	1	1
NDUFB4	-6.42579	-2.42579	3.49371e-10	2.80148e-08	1	1
CAD	-6.41948	-2.41948	6.21974e-12	7.49436e-10	1	1
TOMM22	-6.40611	-2.40611	2.34682e-15	5.3655e-13	1	1
EIF4G1	-6.40021	-2.40021	5.24768e-11	5.00438e-09	1	1
RAN	-6.39683	-2.39683	1.35227e-12	1.81316e-10	1	1
RRP12	-6.39319	-2.39319	1.28003e-13	2.00235e-11	1	1
CDC40	-6.38884	-2.38884	2.94749e-11	3.08873e-09	1	1
FDX1L	-6.38483	-2.38483	8.05653e-16	1.96811e-13	1	1
AK6	-6.38306	-2.38306	1.65848e-17	5.28136e-15	1	1
NCBP2	-6.38169	-2.38169	4.39384e-15	9.55553e-13	1	1
MCM5	-6.37361	-2.37361	2.18626e-13	3.33227e-11	1	1
HARS	-6.36468	-2.36468	1.51927e-13	2.33562e-11	1	1
PRPF38B	-6.35904	-2.35904	6.15427e-14	1.03537e-11	1	1
CDK7	-6.35806	-2.35806	3.71341e-14	6.36742e-12	1	1
AFG3L2	-6.35704	-2.35704	1.09948e-12	1.48538e-10	1	1
DYNLRB1	-6.34923	-2.34923	3.15168e-11	3.26767e-09	1	1
EP300	-6.33968	-2.33969	2.28471e-09	1.53748e-07	1	1
IPO7	-6.32805	-2.32805	6.40387e-12	7.65312e-10	1	1
HJURP	-6.32077	-2.32078	2.59903e-09	1.7359e-07	1	1
SNAPC5	-6.31431	-2.31431	1.00243e-12	1.3751e-10	1	1
RNF168	-6.31312	-2.31312	3.26912e-14	5.7155e-12	1	1
TAZ	-6.3129	-2.3129	6.72629e-16	1.68871e-13	1	1
PSMB3	-6.30797	-2.30797	2.10636e-18	7.82556e-16	1	1
CARS2	-6.30788	-2.30788	3.66361e-11	3.71211e-09	1	1
GAR1	-6.30607	-2.30607	2.3358e-16	6.31126e-14	1	1
INTS5	-6.30346	-2.30346	2.33523e-14	4.24941e-12	1	1
SURF6	-6.30144	-2.30144	1.4108e-11	1.55595e-09	1	1
TFRC	-6.30039	-2.30039	6.56579e-12	7.75416e-10	1	1
RPL23A	-6.29772	-2.29772	4.97532e-12	6.11896e-10	1	1
NDUFAF3	-6.2911	-2.2911	9.40751e-12	1.08938e-09	1	1
OGT	-6.28478	-2.28478	1.10011e-10	9.76033e-09	1	1
RPS2	-6.27908	-2.27908	1.12291e-11	1.28365e-09	1	1
CDC20	-6.27897	-2.27897	1.64581e-12	2.14231e-10	1	1
NKAP	-6.27822	-2.27823	1.71979e-12	2.22239e-10	1	1
SARS2	-6.2754	-2.2754	7.81083e-11	7.10666e-09	1	1
SSBP3	-6.275	-2.275	8.26122e-11	7.47829e-09	1	1
SLC16A1	-6.26799	-2.26799	1.15631e-11	1.3134e-09	1	1
RFC3	-6.26498	-2.26498	8.48136e-14	1.35043e-11	1	1
MCAT	-6.26181	-2.26181	6.65884e-15	1.39702e-12	1	1
GPKOW	-6.2618	-2.2618	3.19196e-10	2.59919e-08	1	1
RPS4X	-6.2541	-2.2541	4.05074e-12	5.05153e-10	1	1
TRMT61A	-6.24246	-2.24246	4.30382e-13	6.27725e-11	1	1
NAE1	-6.24152	-2.24152	7.31498e-13	1.01913e-10	1	1
CACTIN	-6.2381	-2.2381	4.82307e-10	3.73956e-08	1	1
RSL24D1	-6.23544	-2.23545	3.44474e-11	3.53047e-09	1	1
HSF1	-6.23391	-2.23391	4.96681e-13	7.14299e-11	1	1
MCUR1	-6.23358	-2.23358	7.8568e-14	1.27373e-11	1	1
NRBP1	-6.23299	-2.23299	7.50114e-10	5.52418e-08	1	1
MRPL38	-6.23201	-2.23201	1.61332e-12	2.11547e-10	1	1
NUP133	-6.23031	-2.23031	2.17209e-09	1.47281e-07	1	1
DOLK	-6.22501	-2.22501	2.98138e-13	4.46781e-11	1	1
ANAPC4	-6.22209	-2.22209	3.98823e-11	3.9294e-09	1	1
RARS2	-6.22004	-2.22004	1.63249e-11	1.76437e-09	1	1
ARCN1	-6.21457	-2.21457	1.05384e-12	1.43459e-10	1	1
CTC1	-6.21295	-2.21295	4.97113e-12	6.11896e-10	1	1
ANAPC15	-6.20466	-2.20466	1.06803e-10	9.52313e-09	1	1
HARS2	-6.20375	-2.20375	7.01243e-14	1.16872e-11	1	1
PPAN	-6.19974	-2.19976	4.2504e-09	2.65026e-07	1	1
POLR2G	-6.19445	-2.19445	2.05429e-11	2.20688e-09	1	1
HAUS3	-6.1923	-2.1923	7.92402e-10	5.79136e-08	1	1
NELFB	-6.19105	-2.19109	8.4083e-09	4.88421e-07	1	1
WDR74	-6.18833	-2.18835	3.84441e-09	2.43976e-07	1	1
WNK1	-6.18609	-2.18609	2.54603e-10	2.13161e-08	1	1
SLC30A9	-6.17641	-2.17641	6.91673e-12	8.11487e-10	1	1
CCDC86	-6.17273	-2.17273	6.43733e-12	7.65312e-10	1	1
CHKA	-6.15886	-2.15886	5.81314e-10	4.39261e-08	1	1
VPS72	-6.15296	-2.15296	3.0604e-10	2.51502e-08	1	1
WDR25	-6.15198	-2.15198	4.11521e-11	4.02007e-09	1	1
FCF1	-6.14737	-2.14737	2.74961e-14	4.95291e-12	1	1
MED19	-6.14051	-2.14051	1.04991e-11	1.20794e-09	1	1
KPNB1	-6.13446	-2.13446	1.56523e-10	1.35499e-08	1	1
FANCM	-6.13387	-2.13387	2.77247e-10	2.2996e-08	1	1
RPL17	-6.13018	-2.13018	7.60818e-14	1.24474e-11	1	1
WDR48	-6.12851	-2.12851	1.72093e-14	3.29993e-12	1	1
DNTTIP1	-6.12466	-2.12466	3.18506e-11	3.28319e-09	1	1
MRPS22	-6.12236	-2.12236	6.74402e-13	9.46977e-11	1	1
EIF2B5	-6.11783	-2.11785	4.47538e-09	2.75205e-07	1	1
PSMC1	-6.11758	-2.11763	1.03185e-08	5.73242e-07	1	1
SMG7	-6.11296	-2.11296	3.185e-13	4.73318e-11	1	1
RPS20	-6.1115	-2.1115	6.44835e-11	6.05229e-09	1	1
COX18	-6.10936	-2.10936	7.72682e-11	7.06628e-09	1	1
CTNNBL1	-6.10045	-2.10045	1.50553e-15	3.53264e-13	1	1
MRPS2	-6.10037	-2.10038	7.24829e-10	5.38578e-08	1	1
CARS	-6.09919	-2.09919	2.93476e-11	3.08873e-09	1	1
PSMA1	-6.09722	-2.09722	8.10729e-12	9.44949e-10	1	1
MRPL10	-6.0941	-2.09411	5.57179e-10	4.22816e-08	1	1
RPL13A	-6.09101	-2.09104	8.67806e-09	4.99212e-07	1	1
NUDCD3	-6.08625	-2.08625	2.39783e-11	2.54526e-09	1	1
MRPL43	-6.08386	-2.08387	1.76661e-09	1.22584e-07	1	1
MED21	-6.06988	-2.0699	3.72789e-09	2.38278e-07	1	1
KIN	-6.06838	-2.06838	7.71002e-11	7.06628e-09	1	1
ANAPC5	-6.06759	-2.06759	8.5965e-13	1.18838e-10	1	1
BCAS2	-6.06234	-2.06234	1.89535e-12	2.43163e-10	1	1
NCAPH	-6.06206	-2.06207	2.61195e-09	1.73802e-07	1	1
WDR43	-6.05542	-2.05542	7.34667e-11	6.8236e-09	1	1
PSMB6	-6.0551	-2.0551	1.5e-09	1.06149e-07	1	1
POLR2B	-6.04732	-2.04734	3.2903e-09	2.13712e-07	1	1
DHX33	-6.04561	-2.04564	7.39625e-09	4.33873e-07	1	1
SUPT5H	-6.04498	-2.045	3.71526e-09	2.38278e-07	1	1
EIF4A1	-6.04397	-2.04398	6.28931e-10	4.73237e-08	1	1
MRPL44	-6.04256	-2.04257	1.94708e-09	1.34063e-07	1	1
RANGAP1	-6.03842	-2.03931	2.04882e-07	8.57668e-06	1	1
HEATR3	-6.03073	-2.03081	1.63828e-08	8.77342e-07	1	1
TUBB	-6.02605	-2.02605	8.78177e-15	1.81826e-12	1	1
PDRG1	-6.0223	-2.0223	8.53035e-11	7.68291e-09	1	1
PHF5A	-6.0198	-2.01981	2.51135e-09	1.68365e-07	1	1
GLTSCR2	-6.01326	-2.01326	9.42376e-11	8.44492e-09	1	1
SYS1	-6.01119	-2.01119	2.68938e-13	4.06438e-11	1	1
PLK1	-6.0021	-2.00478	6.19076e-07	2.33898e-05	1	1
XRN1	-6.00077	-2.00077	2.30404e-10	1.9473e-08	1	1
PREB	-5.99756	-1.99822	1.5325e-07	6.66563e-06	1	1
TUBG2	-5.99513	-1.99517	9.80529e-09	5.52089e-07	1	1
TUBA1B	-5.99326	-1.99326	5.6413e-12	6.84362e-10	1	1
KLF1	-5.99296	-1.99297	5.0697e-10	3.8969e-08	1	1
RPL18A	-5.99265	-1.99268	5.0308e-09	3.05151e-07	1	1
COX15	-5.98578	-1.98578	5.37808e-13	7.63501e-11	1	1
POLR1C	-5.98531	-1.98531	5.23141e-11	5.00438e-09	1	1
RBFA	-5.98498	-1.98502	9.31217e-09	5.32109e-07	1	1
TSR2	-5.98107	-1.98107	4.92017e-10	3.79833e-08	1	1
DIEXF	-5.97121	-1.97121	7.52748e-10	5.52418e-08	1	1
MRPS11	-5.96862	-1.96863	2.08167e-10	1.78473e-08	1	1
DHX30	-5.96692	-1.96692	1.53361e-09	1.07673e-07	1	1
CDS2	-5.96444	-1.96444	3.72261e-11	3.73842e-09	1	1
PRPF8	-5.96147	-1.96147	1.46997e-10	1.27873e-08	1	1
INTS8	-5.9597	-1.9597	5.09335e-11	4.90971e-09	1	1
MRPL51	-5.95701	-1.95701	1.97656e-14	3.6826e-12	1	1
XPO5	-5.95331	-1.95335	8.72473e-09	5.00283e-07	1	1
PRPF19	-5.94782	-1.94791	1.94574e-08	1.03577e-06	1	1
CTR9	-5.9475	-1.94751	1.04623e-09	7.58433e-08	1	1
GEMIN5	-5.94538	-1.94577	9.11983e-08	4.22426e-06	1	1
EXOSC3	-5.9448	-1.9448	2.87614e-10	2.37455e-08	1	1
TMA16	-5.94444	-1.9451	1.50223e-07	6.566e-06	1	1
ATP6V0B	-5.92735	-1.929	3.80013e-07	1.51946e-05	1	1
SNF8	-5.92407	-1.92424	3.72328e-08	1.87035e-06	1	1
MRPS10	-5.92364	-1.92392	6.48814e-08	3.07721e-06	1	1
TRAPPC8	-5.92277	-1.92277	2.09112e-09	1.42878e-07	1	1
SCO2	-5.92049	-1.92056	1.48224e-08	7.99499e-07	1	1
ATP6V0C	-5.92002	-1.92004	2.62178e-09	1.73807e-07	1	1
YY1	-5.9186	-1.91861	2.12349e-09	1.44535e-07	1	1
RPS28	-5.91707	-1.91709	6.35496e-09	3.80296e-07	1	1
NRDE2	-5.91213	-1.91216	6.02402e-09	3.61705e-07	1	1
ZNF830	-5.91052	-1.911	1.12282e-07	5.03101e-06	1	1
MARS2	-5.90621	-1.907	1.82132e-07	7.75167e-06	1	1
SLBP	-5.90124	-1.90124	5.33887e-10	4.06872e-08	1	1
ATP1B3	-5.89929	-1.89992	1.44757e-07	6.37395e-06	1	1
ELP5	-5.89924	-1.89996	1.64822e-07	7.08258e-06	1	1
WDR82	-5.89888	-1.89892	9.33943e-09	5.32109e-07	1	1
DTYMK	-5.89623	-1.89624	2.75095e-09	1.80359e-07	1	1
GADD45A	-5.8962	-1.8962	7.429e-10	5.49715e-08	0.735896	1
KIAA0391	-5.89546	-1.89588	9.79073e-08	4.46542e-06	1	1
CTU2	-5.89378	-1.89382	9.76088e-09	5.52089e-07	1	1
MDN1	-5.8924	-1.8924	2.69968e-10	2.24969e-08	1	1
DDX3X	-5.89137	-1.89137	1.50971e-12	1.99427e-10	1	1
PFDN6	-5.89039	-1.89144	2.42255e-07	1.00702e-05	1	1
PPP1R35	-5.88899	-1.88899	4.11454e-13	6.06401e-11	1	1
SIN3A	-5.88886	-1.8889	1.00128e-08	5.60995e-07	1	1
UFSP2	-5.88851	-1.88855	9.7689e-09	5.52089e-07	1	1
SNRNP25	-5.88843	-1.88845	4.3854e-09	2.70605e-07	1	1
TUBGCP6	-5.88698	-1.88724	6.13755e-08	2.93434e-06	1	1
TIMM22	-5.88653	-1.88654	3.13869e-09	2.05027e-07	1	1
LUC7L3	-5.88376	-1.88382	1.35754e-08	7.40334e-07	1	1
SNRPB	-5.8835	-1.88361	2.52298e-08	1.31173e-06	1	1
MED9	-5.87646	-1.87646	3.7315e-11	3.73842e-09	1	1
CCNA2	-5.87171	-1.87171	1.2841e-10	1.12481e-08	1	1
MAU2	-5.87136	-1.87158	5.20818e-08	2.52384e-06	1	1
EIF2AK4	-5.87119	-1.87119	4.12535e-11	4.02007e-09	1	1
AGPAT5	-5.86699	-1.867	3.50322e-10	2.80148e-08	1	1
PFAS	-5.8646	-1.8646	3.31597e-10	2.67573e-08	1	1
CCT3	-5.86247	-1.86249	4.06318e-09	2.55136e-07	1	1
DNAJC17	-5.86018	-1.86018	1.61893e-11	1.76039e-09	1	1
SFPQ	-5.85661	-1.85663	4.53782e-09	2.78086e-07	1	1
PDSS2	-5.85637	-1.85649	2.81087e-08	1.44874e-06	1	1
DCTN2	-5.85588	-1.85589	1.15051e-09	8.30649e-08	1	1
BYSL	-5.85078	-1.85079	2.63559e-09	1.74076e-07	1	1
ORC1	-5.8498	-1.85005	5.6439e-08	2.72758e-06	1	1
CSTF3	-5.84823	-1.84833	2.31592e-08	1.2076e-06	1	1
EIF3I	-5.84761	-1.84764	6.47557e-09	3.84929e-07	1	1
TUT1	-5.84517	-1.84983	1.07885e-06	3.87105e-05	1	1
RPL31	-5.84474	-1.84502	6.33726e-08	3.02172e-06	1	1
DCAF7	-5.84446	-1.84463	3.88146e-08	1.93347e-06	1	1
ALG1	-5.84238	-1.84243	1.01406e-08	5.65116e-07	1	1
SUPV3L1	-5.84008	-1.84008	2.24634e-10	1.90757e-08	1	1
TUBE1	-5.83879	-1.83879	1.28672e-10	1.12481e-08	1	1
TTI2	-5.835	-1.835	3.63894e-10	2.88414e-08	1	1
TMED10	-5.83423	-1.83425	4.04528e-09	2.5491e-07	1	1
RPS18	-5.83341	-1.83341	3.48332e-11	3.54961e-09	1	1
USP39	-5.82987	-1.82988	3.39369e-09	2.18483e-07	1	1
RAD51C	-5.8228	-1.82301	4.83495e-08	2.36224e-06	1	1
CENPT	-5.81982	-1.81995	2.90241e-08	1.4916e-06	1	1
METTL14	-5.81946	-1.81964	4.1944e-08	2.07774e-06	1	1
RBBP4	-5.81879	-1.81897	4.11724e-08	2.0452e-06	1	1
RBM8A	-5.81812	-1.81814	3.29562e-09	2.13712e-07	1	1
UNC45A	-5.81592	-1.81595	6.54001e-09	3.87468e-07	1	1
MTHFD1	-5.81566	-1.81566	3.11093e-10	2.54483e-08	1	1
DDX5	-5.81514	-1.81515	1.50989e-09	1.06427e-07	1	1
DARS2	-5.81499	-1.81511	2.80772e-08	1.44874e-06	1	1
DPH2	-5.81361	-1.81367	1.48396e-08	7.99499e-07	1	1
MAPK14	-5.80841	-1.80841	1.34744e-13	2.08947e-11	1	1
ATL2	-5.80424	-1.80427	5.65548e-09	3.40724e-07	1	1
GINS4	-5.80423	-1.80488	1.50008e-07	6.566e-06	1	1
PSMD4	-5.80236	-1.80241	1.35047e-08	7.38738e-07	1	1
GARS	-5.79972	-1.79985	3.10184e-08	1.58952e-06	0.756787	1
YKT6	-5.79849	-1.80225	8.69487e-07	3.19702e-05	1	1
MRPS15	-5.79701	-1.79927	5.22443e-07	2.01225e-05	1	1
PLK4	-5.79631	-1.79631	3.88224e-11	3.84622e-09	1	1
SCD	-5.79066	-1.79067	3.56297e-10	2.83654e-08	1	1
SNW1	-5.78589	-1.7859	1.60644e-09	1.11905e-07	1	1
MRPL16	-5.7854	-1.78542	6.73075e-09	3.96137e-07	1	1
DONSON	-5.78359	-1.78368	2.16217e-08	1.13406e-06	1	1
YEATS4	-5.78078	-1.79089	2.3559e-06	8.03302e-05	1	1
SF3A1	-5.76734	-1.76734	1.60384e-09	1.11905e-07	1	1
RFT1	-5.76298	-1.76414	2.68228e-07	1.10245e-05	1	1
EMC3	-5.7609	-1.76455	8.45874e-07	3.1184e-05	1	1
MRPL3	-5.75868	-1.75878	2.28059e-08	1.19266e-06	1	1
RABGGTA	-5.75851	-1.76423	1.3258e-06	4.67251e-05	1	1
SRSF11	-5.75405	-1.75812	9.40556e-07	3.42305e-05	1	1
TFB2M	-5.7527	-1.75271	1.31123e-09	9.31598e-08	1	1
USP8	-5.75229	-1.75231	3.31189e-09	2.13989e-07	1	1
GATC	-5.75197	-1.75729	1.23267e-06	4.37893e-05	1	1
SF3A2	-5.75076	-1.75076	7.0521e-10	5.26193e-08	1	1
PMVK	-5.74903	-1.74941	8.76063e-08	4.06845e-06	1	1
NOP16	-5.74588	-1.7459	4.21105e-09	2.63494e-07	1	1
EHMT1	-5.74558	-1.74559	2.70419e-09	1.77948e-07	1	1
COX10	-5.74546	-1.74627	1.88509e-07	7.94724e-06	1	1
GPATCH1	-5.74171	-1.74177	1.37821e-08	7.49316e-07	1	1
RBM22	-5.73924	-1.73924	1.11107e-10	9.80881e-09	1	1
SNRNP40	-5.73916	-1.73928	2.6696e-08	1.38392e-06	1	1
SKA3	-5.73361	-1.73441	1.83975e-07	7.81151e-06	1	1
NDUFB2	-5.72908	-1.72909	2.23967e-09	1.51288e-07	1	1
EIF3D	-5.72828	-1.72828	6.7033e-10	5.02268e-08	1	1
CINP	-5.7256	-1.72561	2.03879e-09	1.39837e-07	1	1
ATR	-5.72495	-1.72523	6.36724e-08	3.02792e-06	1	1
PAFAH1B1	-5.72251	-1.72267	3.50747e-08	1.77695e-06	1	1
PRMT5	-5.72106	-1.72106	4.61992e-10	3.59769e-08	1	1
AP2S1	-5.71335	-1.71336	1.2442e-09	8.87512e-08	1	1
SMCHD1	-5.70574	-1.7058	1.34414e-08	7.37542e-07	1	1
NDUFB8	-5.69975	-1.7002	1.03225e-07	4.67212e-06	1	1
MED12	-5.69686	-1.697	3.42109e-08	1.73813e-06	1	1
ATP1A1	-5.69314	-1.69393	1.80477e-07	7.69964e-06	1	1
ATP6V1A	-5.6924	-1.69241	1.01811e-09	7.41056e-08	1	1
LEO1	-5.68983	-1.68985	3.78431e-09	2.4102e-07	1	1
MRPS30	-5.68398	-1.68631	5.37204e-07	2.05818e-05	1	1
POLR2I	-5.68301	-1.68303	4.76722e-09	2.9015e-07	1	1
UBL5	-5.68207	-1.68207	1.19642e-09	8.56856e-08	1	1
TSEN54	-5.68194	-1.68353	3.67964e-07	1.47459e-05	1	1
GAB2	-5.68061	-1.68306	5.66373e-07	2.16277e-05	1	1
RBM42	-5.67971	-1.67972	1.16183e-09	8.35439e-08	1	1
ELAVL1	-5.67853	-1.69003	2.68191e-06	9.02388e-05	1	1
ZC3H4	-5.67769	-1.68709	2.1882e-06	7.50428e-05	1	1
NDUFB11	-5.67726	-1.67799	1.67623e-07	7.16841e-06	1	1
UTP15	-5.67161	-1.67603	1.02315e-06	3.69348e-05	1	1
RPS13	-5.67118	-1.67175	1.32578e-07	5.86667e-06	1	1
MVK	-5.6662	-1.6666	9.27881e-08	4.26433e-06	1	1
TIMMDC1	-5.66586	-1.66738	3.51004e-07	1.41617e-05	1	1
MED14	-5.66525	-1.66663	3.1795e-07	1.29157e-05	1	1
COA3	-5.6642	-1.6642	1.40403e-11	1.55595e-09	1	1
MPV17L2	-5.66053	-1.66394	7.86309e-07	2.9213e-05	1	1
TRAPPC4	-5.65906	-1.6591	8.56652e-09	4.95996e-07	1	1
NUP88	-5.659	-1.6594	9.30199e-08	4.26433e-06	1	1
GEMIN6	-5.65864	-1.6861	6.52529e-06	0.000207796	1	1
PITRM1	-5.65655	-1.6571	1.25576e-07	5.5985e-06	1	1
SNRNP27	-5.65611	-1.66573	2.23855e-06	7.66218e-05	1	1
SRP72	-5.65154	-1.65219	1.50864e-07	6.57791e-06	1	1
AAMP	-5.6505	-1.6624	2.77868e-06	9.31434e-05	1	1
POLE	-5.65011	-1.65136	2.89669e-07	1.18207e-05	1	1
SLC20A1	-5.64964	-1.6498	3.59464e-08	1.81596e-06	1	1
RPL13	-5.64869	-1.64878	1.93449e-08	1.03287e-06	1	1
MAT2A	-5.64684	-1.6469	1.51547e-08	8.14018e-07	1	1
FNTA	-5.64273	-1.65603	3.10876e-06	0.00010343	1	1
ATPAF2	-5.64213	-1.64498	6.57511e-07	2.47371e-05	1	1
SMARCB1	-5.64099	-1.64099	3.1539e-12	3.96081e-10	1	1
INTS1	-5.63764	-1.70891	1.78355e-05	0.000529219	1	1
RIOK2	-5.6348	-1.63481	1.8935e-09	1.30879e-07	1	1
PHIP	-5.63363	-1.63363	4.34553e-10	3.39885e-08	1	1
PSIP1	-5.63087	-1.63117	6.78726e-08	3.21054e-06	0.457387	1
COQ5	-5.62957	-1.63664	1.63972e-06	5.74483e-05	1	1
SAE1	-5.62911	-1.62914	6.42809e-09	3.83385e-07	1	1
CHEK1	-5.62477	-1.62477	4.32454e-10	3.39733e-08	1	1
BUB3	-5.62443	-1.6287	9.88647e-07	3.58344e-05	1	1
CIAPIN1	-5.62161	-1.62214	1.22678e-07	5.483e-06	1	1
CNOT3	-5.62148	-1.62374	5.21253e-07	2.01202e-05	1	1
CDK12	-5.61599	-1.61619	4.59359e-08	2.25668e-06	1	1
MRPL53	-5.61176	-1.64609	8.22476e-06	0.000254198	1	1
IMP3	-5.6099	-1.6101	4.52714e-08	2.23018e-06	1	1
TOMM20	-5.60705	-1.60823	2.71118e-07	1.11146e-05	1	1
TSFM	-5.60615	-1.60615	5.90281e-11	5.56957e-09	1	1
SMU1	-5.60378	-1.60393	3.32909e-08	1.69622e-06	1	1
ATP5L	-5.59556	-1.59672	2.68302e-07	1.10245e-05	1	1
LAS1L	-5.59536	-1.71018	3.0263e-05	0.000847223	1	1
BIRC5	-5.5947	-1.59664	4.46397e-07	1.75344e-05	1	1
ROMO1	-5.59156	-1.59225	1.58963e-07	6.88054e-06	1	1
MRPL45	-5.59082	-1.59467	8.9125e-07	3.26359e-05	1	1
TPI1	-5.59032	-1.59234	4.66712e-07	1.81722e-05	1	1
CENPI	-5.58643	-1.58838	4.47987e-07	1.75581e-05	1	1
ISY1-RAB43	-5.58542	-1.58542	5.30394e-12	6.47843e-10	1	1
MTPAP	-5.58524	-1.58534	2.16197e-08	1.13406e-06	1	1
ALDOA	-5.581	-1.5814	9.24497e-08	4.26009e-06	1	1
EIF3B	-5.58067	-1.58131	1.47306e-07	6.47023e-06	1	1
GPN2	-5.58041	-1.5814	2.28622e-07	9.54803e-06	1	1
DCP2	-5.57768	-1.57771	8.59785e-09	4.96199e-07	1	1
PGD	-5.57699	-1.57708	2.1087e-08	1.11918e-06	1	1
LENG1	-5.57485	-1.57544	1.3638e-07	6.01997e-06	1	1
C7orf26	-5.57269	-1.57376	2.48276e-07	1.02965e-05	1	1
UTP20	-5.57018	-1.58621	3.75949e-06	0.000123241	1	1
HUS1	-5.56901	-1.63927	1.75608e-05	0.000521937	1	1
ELAC2	-5.56748	-1.5675	4.03643e-09	2.5491e-07	0.362074	1
FARSA	-5.56194	-1.56198	7.99027e-09	4.65655e-07	1	1
IWS1	-5.56075	-1.56078	5.2363e-09	3.16539e-07	1	1
PSMC4	-5.55859	-1.55859	3.30086e-10	2.67565e-08	1	1
EXOSC2	-5.55827	-1.56019	4.43492e-07	1.74587e-05	1	1
DCTN3	-5.55684	-1.60365	1.13791e-05	0.000345106	1	1
MAD2L2	-5.55679	-1.55855	4.07263e-07	1.61483e-05	1	1
NACA	-5.55474	-1.58246	6.59001e-06	0.000209483	1	1
RGP1	-5.5534	-1.58305	7.06357e-06	0.000222552	1	1
CDK8	-5.54894	-1.54934	9.18233e-08	4.24219e-06	1	1
MCMBP	-5.54463	-1.54635	3.97997e-07	1.5878e-05	1	1
EARS2	-5.54192	-1.54196	9.81395e-09	5.52089e-07	1	1
INPPL1	-5.54153	-1.54169	3.72248e-08	1.87035e-06	1	1
WDR75	-5.53937	-1.53993	1.30351e-07	5.7969e-06	1	1
MRPL52	-5.53652	-1.53668	3.85504e-08	1.92568e-06	0.489076	1
GATA1	-5.53538	-1.53543	1.00352e-08	5.60995e-07	1	1
ZFP91	-5.53482	-1.53781	6.90773e-07	2.58793e-05	1	1
C19orf70	-5.53442	-1.53619	4.0818e-07	1.61483e-05	1	1
RCOR1	-5.53342	-1.54528	2.76893e-06	9.29912e-05	1	1
GLRX5	-5.5334	-1.53346	1.29808e-08	7.16679e-07	1	1
SPATA5L1	-5.53063	-1.53065	4.32707e-09	2.67933e-07	0.808033	1
MEN1	-5.52829	-1.52985	3.60939e-07	1.45296e-05	1	1
NDUFV2	-5.52659	-1.52706	1.07111e-07	4.83572e-06	1	1
SMARCC1	-5.52551	-1.52694	3.29195e-07	1.33421e-05	1	1
DLST	-5.52523	-1.53871	3.15344e-06	0.000104527	1	1
DPAGT1	-5.52378	-1.52422	1.01434e-07	4.60271e-06	1	1
NDUFB6	-5.52093	-1.52295	4.66316e-07	1.81722e-05	1	1
DNAJC9	-5.52005	-1.5204	8.14201e-08	3.80096e-06	1	1
NCAPH2	-5.51521	-1.53423	4.47832e-06	0.000145468	1	1
C16orf59	-5.51495	-1.51607	2.59794e-07	1.07243e-05	1	1
GOSR2	-5.51288	-1.51704	9.64295e-07	3.5023e-05	1	1
IDH3A	-5.51111	-1.51113	4.30551e-09	2.67527e-07	1	1
CCND3	-5.50945	-1.50978	7.76852e-08	3.64568e-06	1	1
EXOSC1	-5.50742	-1.50767	5.93445e-08	2.85253e-06	1	1
DBR1	-5.50712	-1.50871	3.6776e-07	1.47459e-05	1	1
RPL15	-5.50568	-1.50712	3.32084e-07	1.34287e-05	1	1
MRPL12	-5.50534	-1.52708	5.13403e-06	0.000164667	1	1
FASTKD5	-5.50392	-1.50411	4.38565e-08	2.16646e-06	1	1
MRPS9	-5.50236	-1.50711	1.09993e-06	3.93878e-05	1	1
SP2	-5.50054	-1.50183	2.97712e-07	1.21212e-05	1	1
RRS1	-5.49896	-1.49939	9.98592e-08	4.54283e-06	1	1
BOD1L1	-5.49561	-1.51364	4.24032e-06	0.000137988	1	1
ELP4	-5.49227	-1.49227	1.41347e-11	1.55595e-09	1	1
KMT2B	-5.49177	-1.4941	5.37829e-07	2.05818e-05	1	1
WDR61	-5.49095	-1.49165	1.59612e-07	6.88089e-06	1	1
SRSF7	-5.4896	-1.48989	6.8755e-08	3.24367e-06	1	1
PSMG4	-5.48813	-1.48822	2.12645e-08	1.12525e-06	1	1
TADA1	-5.48169	-1.48173	7.87682e-09	4.60548e-07	1	1
CDK13	-5.48149	-1.48196	1.09441e-07	4.92843e-06	1	1
NAPA	-5.47971	-1.48188	5.00216e-07	1.93921e-05	1	1
CFDP1	-5.47948	-1.54243	1.5598e-05	0.000467495	1	1
MAK16	-5.47683	-1.47686	6.67315e-09	3.94047e-07	1	1
UMPS	-5.47538	-1.48675	2.65283e-06	8.9429e-05	1	1
RNPC3	-5.47464	-1.50292	6.72846e-06	0.000212746	1	1
UFC1	-5.4745	-1.50278	6.72787e-06	0.000212746	1	1
VPS35	-5.47432	-1.47505	1.67285e-07	7.16841e-06	1	1
UBTF	-5.47396	-1.50305	6.92667e-06	0.000218625	1	1
WDR18	-5.47237	-1.47554	7.33824e-07	2.73772e-05	1	1
EEF2	-5.47233	-1.47247	3.17724e-08	1.62349e-06	1	1
NDC80	-5.47183	-1.47565	8.82592e-07	3.23853e-05	1	1
MTBP	-5.46816	-1.50937	9.95419e-06	0.000303441	1	1
RPRD2	-5.46567	-1.46567	2.45955e-10	2.06892e-08	1	1
TEN1	-5.4616	-1.46521	8.35595e-07	3.09153e-05	1	1
COASY	-5.46127	-1.46478	8.09617e-07	3.00164e-05	1	1
CYB5B	-5.45907	-1.45907	5.15479e-10	3.94529e-08	0.150279	1
QRICH1	-5.45801	-1.45858	1.32498e-07	5.86667e-06	1	1
BOP1	-5.45787	-1.46114	7.55619e-07	2.81314e-05	1	1
NEDD8-MDP1	-5.45493	-1.45766	6.29678e-07	2.37401e-05	1	1
AATF	-5.45477	-1.45739	6.04921e-07	2.29522e-05	1	1
PGAM1	-5.45246	-1.53598	2.12052e-05	0.000618906	1	1
STARD7	-5.45065	-1.45978	2.12559e-06	7.3036e-05	1	1
TBCB	-5.45032	-1.47038	4.72591e-06	0.000153231	1	1
RPL10	-5.44894	-1.44894	2.2086e-10	1.88449e-08	1	1
NOM1	-5.44883	-1.44899	3.78894e-08	1.89798e-06	1	1
RNASEH1	-5.44787	-1.45189	9.28731e-07	3.39386e-05	1	1
BRF2	-5.44585	-1.44594	2.13712e-08	1.12755e-06	1	1
HTATSF1	-5.44485	-1.55627	2.92473e-05	0.000826572	1	1
DNAJA3	-5.44242	-1.44262	4.6484e-08	2.27733e-06	1	1
RABGGTB	-5.44091	-1.44213	2.81011e-07	1.14937e-05	1	1
COA5	-5.4405	-1.44056	1.43928e-08	7.80143e-07	1	1
SF3B1	-5.43788	-1.47516	8.96144e-06	0.000275533	1	1
STAT5B	-5.43688	-1.44534	1.96631e-06	6.80878e-05	1	1
CPSF2	-5.43656	-1.56746	3.51743e-05	0.000977047	1	1
LSM7	-5.43423	-1.4351	1.99344e-07	8.38419e-06	1	1
RAE1	-5.43344	-1.44332	2.30137e-06	7.86214e-05	1	1
WDHD1	-5.43137	-1.43929	1.8405e-06	6.38554e-05	1	1
COX8A	-5.4303	-1.43035	1.22773e-08	6.79939e-07	1	1
MRPS5	-5.42671	-1.42866	4.50698e-07	1.76256e-05	1	1
HINFP	-5.42582	-1.59211	4.6655e-05	0.00125679	1	1
REXO2	-5.42191	-1.4242	5.3012e-07	2.03742e-05	1	1
POLR1A	-5.42149	-1.4223	1.86371e-07	7.89442e-06	1	1
TIMM50	-5.42139	-1.48472	1.57002e-05	0.000469768	1	1
IMMT	-5.42048	-1.4245	9.31202e-07	3.39594e-05	1	1
DHX15	-5.42009	-1.43353	3.14285e-06	0.00010437	1	1
DCTN5	-5.41932	-1.4502	7.36932e-06	0.000230556	1	1
MNT	-5.41407	-1.41488	1.87242e-07	7.91251e-06	1	1
USB1	-5.41267	-1.41633	8.46355e-07	3.1184e-05	1	1
SACM1L	-5.40946	-1.51334	2.70227e-05	0.000773508	1	1
RRP1	-5.40698	-1.43831	7.48223e-06	0.000233679	1	1
CENPA	-5.40039	-1.40071	7.4513e-08	3.50604e-06	1	1
DPY30	-5.3993	-1.40109	4.1299e-07	1.62939e-05	1	1
ISCU	-5.39862	-1.40998	2.64995e-06	8.9429e-05	1	1
GTF3C4	-5.3922	-1.39261	9.38667e-08	4.29212e-06	1	1
AHCY	-5.38914	-1.3963	1.66252e-06	5.81329e-05	1	1
RBMX	-5.38686	-1.38688	4.65178e-09	2.84093e-07	1	1
DNM1L	-5.38671	-1.39374	1.63121e-06	5.72626e-05	1	1
RPP40	-5.38549	-1.44296	1.41468e-05	0.000425431	1	1
TNPO1	-5.38286	-1.54146	4.40787e-05	0.0011928	1	1
COPE	-5.38029	-1.39498	3.44012e-06	0.000113607	1	1
NUP54	-5.37908	-1.42316	1.06834e-05	0.000324562	1	1
TAF8	-5.37752	-1.52675	4.10061e-05	0.00111985	1	1
TUBGCP5	-5.37651	-1.3772	1.59743e-07	6.88089e-06	1	1
INTS4	-5.37366	-1.37657	6.70721e-07	2.5181e-05	1	1
RPL3	-5.37269	-1.57901	6.08113e-05	0.00158314	1	1
NOL12	-5.372	-1.49471	3.26486e-05	0.000909723	1	1
RBMX2	-5.36862	-1.37039	4.08395e-07	1.61483e-05	1	1
PSMA7	-5.36789	-1.37334	1.26222e-06	4.45726e-05	1	1
COA6	-5.36683	-1.39846	7.55483e-06	0.000235123	1	1
CAMLG	-5.36399	-1.4894	3.34777e-05	0.000931371	1	1
ZC3H18	-5.3625	-1.3768	3.34631e-06	0.000110714	1	1
PPP4R2	-5.35949	-1.43431	1.88025e-05	0.000554223	1	1
IARS	-5.35431	-1.38459	7.21923e-06	0.000226656	1	1
NOC4L	-5.35398	-1.37179	4.1871e-06	0.000136505	1	1
TUFM	-5.34879	-1.34989	2.53797e-07	1.05011e-05	1	1
BCL2L1	-5.34778	-1.38022	7.75521e-06	0.000240938	1	1
RNMT	-5.33844	-1.34059	4.95639e-07	1.92565e-05	1	1
TKT	-5.33237	-1.33237	1.69251e-10	1.45809e-08	1	1
CUL3	-5.32935	-1.36282	8.01029e-06	0.00024843	1	1
AURKB	-5.3291	-1.34044	2.64673e-06	8.9429e-05	1	1
MCM6	-5.32886	-1.33421	1.23817e-06	4.381e-05	1	1
NOP56	-5.32842	-1.3451	3.91518e-06	0.000128109	1	1
RPS19BP1	-5.32754	-1.36183	8.21384e-06	0.000254198	1	1
PLRG1	-5.32725	-1.3275	5.79251e-08	2.79183e-06	1	1
RPL10A	-5.3271	-1.35859	7.52066e-06	0.000234468	1	1
FAM58A	-5.32434	-1.33282	1.97229e-06	6.81625e-05	1	1
SDAD1	-5.3233	-1.32865	1.23811e-06	4.381e-05	1	1
RRM2	-5.32294	-1.39187	1.71989e-05	0.000512034	1	1
RPS23	-5.32255	-1.43426	2.93326e-05	0.000827671	1	1
PPP2R3C	-5.32094	-1.4001	1.99933e-05	0.000586415	1	1
POLR3H	-5.32005	-1.32026	4.89682e-08	2.37943e-06	1	1
MRPS35	-5.3183	-1.31919	2.04673e-07	8.57668e-06	1	1
COG8	-5.31151	-1.37739	1.63802e-05	0.000488477	1	1
MMACHC	-5.31115	-1.33446	5.51558e-06	0.000176588	1	1
TP53RK	-5.31095	-1.31101	1.30773e-08	7.19773e-07	1	1
CHTF18	-5.30698	-1.30767	1.58448e-07	6.87493e-06	1	1
NOP14	-5.3027	-1.50219	5.83009e-05	0.00153119	1	1
ARMC7	-5.3026	-1.30778	1.19928e-06	4.26883e-05	1	1
TFG	-5.30086	-1.32459	5.61776e-06	0.000179537	1	1
LONP1	-5.29941	-1.32042	4.95591e-06	0.000159528	1	1
SRF	-5.29757	-1.39484	2.51013e-05	0.000720824	1	1
PPWD1	-5.2974	-1.33478	8.98791e-06	0.000275872	1	1
FARSB	-5.2964	-1.29688	1.12283e-07	5.03101e-06	1	1
MED30	-5.29534	-1.44152	4.00147e-05	0.00110447	1	1
EEFSEC	-5.29091	-1.29128	8.47451e-08	3.94585e-06	1	1
TUBGCP4	-5.2904	-1.31103	4.86269e-06	0.000157095	1	1
ATP5F1	-5.29015	-1.44808	4.38566e-05	0.00118859	1	1
UROD	-5.28626	-1.3255	9.4566e-06	0.000288766	1	1
SETDB1	-5.28624	-1.29933	3.06141e-06	0.000102045	1	1
UBE2M	-5.28409	-1.30843	5.76404e-06	0.000183882	1	1
CSNK1A1	-5.27947	-1.28211	6.09756e-07	2.30866e-05	1	1
XRCC6	-5.27717	-1.365	2.24144e-05	0.000649945	1	1
CDC23	-5.27652	-1.29162	3.53702e-06	0.000116376	1	1
RFC4	-5.27566	-1.38695	2.92099e-05	0.000826572	1	1
PISD	-5.27362	-1.30854	8.37151e-06	0.000258286	1	1
MTG2	-5.27021	-1.29161	5.04983e-06	0.000162259	1	1
CDIPT	-5.26643	-1.35341	2.21744e-05	0.000645083	1	1
PSMA4	-5.26387	-1.31865	1.34438e-05	0.000405658	1	1
SLC35B1	-5.26278	-1.51349	7.81181e-05	0.00199582	1	1
WDR46	-5.26144	-1.34378	2.08753e-05	0.000610277	1	1
UBA1	-5.26064	-1.45508	5.64712e-05	0.00149414	1	1
RBM33	-5.26001	-1.43393	4.92507e-05	0.00131284	1	1
IK	-5.2558	-1.31869	1.55831e-05	0.000467495	1	1
SMC2	-5.25225	-1.25947	1.67568e-06	5.84117e-05	1	1
UBA2	-5.25113	-1.40444	4.23346e-05	0.0011526	1	1
ATP5H	-5.25077	-1.25518	1.02069e-06	3.6921e-05	1	1
FAM32A	-5.24947	-1.24968	4.85768e-08	2.36686e-06	1	1
ZMYND8	-5.24742	-1.24994	5.8197e-07	2.21758e-05	1	1
CDK9	-5.24348	-1.24565	5.02311e-07	1.9431e-05	1	1
PAF1	-5.24303	-1.24805	1.16298e-06	4.14787e-05	0.475877	1
NAF1	-5.24283	-1.33473	2.35651e-05	0.000679995	1	1
C19orf53	-5.2426	-1.46271	6.5998e-05	0.00170819	1	1
PDCD11	-5.24235	-1.4973	7.98651e-05	0.00203172	1	1
ZMYM3	-5.24188	-1.2523	2.4275e-06	8.26138e-05	1	1
PSMD6	-5.23581	-1.23843	6.0357e-07	2.29498e-05	1	1
RPL17-C18orf32	-5.23511	-1.24726	2.838e-06	9.49532e-05	1	1
DNAJC21	-5.23221	-1.48613	7.94379e-05	0.00202663	1	1
MARS	-5.23002	-1.39039	4.4667e-05	0.00120506	1	1
POLG2	-5.22877	-1.23969	2.54823e-06	8.63927e-05	1	1
DCTN6	-5.22755	-1.39747	4.78819e-05	0.00128403	1	1
NDUFS1	-5.22626	-1.32874	2.66127e-05	0.000762997	1	1
NDUFB9	-5.22332	-1.22359	6.06212e-08	2.90607e-06	1	1
ASH2L	-5.22212	-1.31733	2.451e-05	0.000704978	1	1
CHMP2A	-5.22094	-1.31462	2.40713e-05	0.00069348	1	1
POLR2J	-5.2163	-1.23102	3.44682e-06	0.000113617	1	1
DDX56	-5.21561	-1.31984	2.71248e-05	0.000775188	1	1
CDC25A	-5.21347	-1.32906	3.04937e-05	0.000852343	1	1
NDUFAB1	-5.21316	-1.41932	6.07511e-05	0.00158314	1	1
VPS13D	-5.20682	-1.35463	4.05432e-05	0.00111202	1	1
SHC1	-5.20605	-1.2802	1.86173e-05	0.000549674	1	1
SSRP1	-5.1989	-1.19992	2.34551e-07	9.77277e-06	1	1
EIF4B	-5.18933	-1.2402	1.24268e-05	0.000375607	1	1
TRIM37	-5.18791	-1.47038	9.16348e-05	0.00230808	1	1
BNIP1	-5.1879	-1.26791	2.02291e-05	0.000592357	1	1
LAGE3	-5.18632	-1.19407	1.80061e-06	6.25931e-05	1	1
C9orf114	-5.18561	-1.19012	1.04389e-06	3.76075e-05	1	1
USP14	-5.1845	-1.19694	2.90399e-06	9.69792e-05	1	1
TERT	-5.18167	-1.29148	2.87669e-05	0.000816878	1	1
RPS15A	-5.18121	-1.49882	0.000107781	0.00267697	1	1
TEFM	-5.17842	-1.25078	1.81298e-05	0.000537058	1	1
BCS1L	-5.17675	-1.24958	1.82576e-05	0.000539946	1	1
PMF1	-5.16796	-1.33517	4.69656e-05	0.00126326	1	1
MED24	-5.16772	-1.53554	0.00013325	0.00321984	1	1
SON	-5.15904	-1.17921	4.75381e-06	0.000153856	1	1
SOD2	-5.15856	-1.30672	4.0657e-05	0.00111202	1	1
TANGO6	-5.1556	-1.21299	1.41287e-05	0.000425431	1	1
SMC3	-5.14915	-1.3512	5.92356e-05	0.00155345	1	1
PRPF38A	-5.14741	-1.26043	2.97259e-05	0.000836556	1	1
UBE2I	-5.14733	-1.33505	5.4069e-05	0.00143475	1	1
RUVBL2	-5.14294	-1.36942	6.84546e-05	0.00176409	1	1
NAA25	-5.13734	-1.33618	5.80666e-05	0.00152729	1	1
PYROXD1	-5.13706	-1.44313	0.000102335	0.00255236	1	1
FBL	-5.13129	-1.13799	1.55498e-06	5.46943e-05	1	1
GPN1	-5.13041	-1.13536	1.14755e-06	4.10105e-05	1	1
TPT1	-5.13038	-1.42566	9.73662e-05	0.00243525	1	1
RPL32	-5.12648	-1.15628	7.10455e-06	0.000223449	1	1
TADA2B	-5.12482	-1.23024	2.74716e-05	0.00078259	1	1
GTF2F2	-5.1206	-1.34539	6.77993e-05	0.00174973	1	1
NOC3L	-5.11693	-1.12548	1.98764e-06	6.85601e-05	1	1
XRCC5	-5.11606	-1.3192	5.9639e-05	0.00155716	1	1
TAF5	-5.1155	-1.35229	7.24975e-05	0.00186289	1	1
ZBTB8OS	-5.11362	-1.37054	8.06841e-05	0.00204963	1	1
DNAAF2	-5.10808	-1.22116	2.97413e-05	0.000836556	1	1
KIF4A	-5.10433	-1.30707	5.94921e-05	0.00155716	1	1
KAT5	-5.10402	-1.10867	1.07644e-06	3.87019e-05	1	1
EXOSC7	-5.10173	-1.11071	2.0897e-06	7.19412e-05	1	1
NCL	-5.1013	-1.37292	8.69025e-05	0.00219509	1	1
MBTPS2	-5.09999	-1.46021	0.000129203	0.0031348	1	1
ATP6V1H	-5.09729	-1.21114	2.99741e-05	0.000841778	1	1
CXXC1	-5.0954	-1.18614	2.32389e-05	0.000671669	1	1
XAB2	-5.09143	-1.19973	2.83234e-05	0.00080557	1	1
CHCHD1	-5.0893	-1.34768	8.12926e-05	0.00206215	1	1
FAM122A	-5.0854	-1.10286	4.10303e-06	0.00013401	1	1
EWSR1	-5.08367	-1.34284	8.16208e-05	0.00206753	1	1
PUF60	-5.0789	-1.3637	9.2665e-05	0.00232746	1	1
RFK	-5.07502	-1.21446	3.78604e-05	0.00104839	1	1
NLE1	-5.06616	-1.06652	8.13465e-08	3.80096e-06	1	1
WBP11	-5.06484	-1.31132	7.63911e-05	0.00196012	1	1
DDHD1	-5.06362	-1.07084	1.67705e-06	5.84117e-05	1	1
MAD2L1BP	-5.06272	-1.21042	4.05064e-05	0.00111202	1	1
WBP4	-5.05795	-1.08575	6.61056e-06	0.000209762	1	1
SPCS2	-5.05489	-1.05663	4.0281e-07	1.60342e-05	1	1
SNRPD2	-5.05107	-1.13	1.99305e-05	0.000585536	1	1
HUWE1	-5.05018	-1.08774	9.03271e-06	0.00027677	1	1
PHGDH	-5.04785	-1.08621	9.23543e-06	0.000282496	1	1
NUFIP1	-5.04419	-1.2391	5.66414e-05	0.00149643	1	1
SPOP	-5.03936	-1.17662	3.71687e-05	0.00103084	1	1
PCYT2	-5.03666	-1.14668	2.88294e-05	0.000817353	1	1
LIPT1	-5.03547	-1.08475	1.20146e-05	0.000363762	1	1
ADSL	-5.03394	-1.07023	8.71634e-06	0.00026846	0.387729	1
BTAF1	-5.02892	-1.17697	4.06186e-05	0.00111202	1	1
MMS19	-5.02621	-1.13145	2.74217e-05	0.000782419	1	1
NFE2	-5.00865	-1.02952	4.92273e-06	0.000158747	1	1
MCM3	-5.00746	-1.37343	0.000132259	0.00320023	1	1
SRPK1	-5.00561	-1.31732	0.000104978	0.00261462	1	1
WDR92	-5.00476	-1.1649	4.45895e-05	0.00120479	1	1
JTB	-5.00189	-1.01743	3.64419e-06	0.000119681	1	1
HK2	-4.99918	-1.04282	1.05713e-05	0.000321702	1	1
SP3	-4.99846	-1.02893	7.26754e-06	0.000227771	1	1
RPAP2	-4.98917	-1.13725	4.06324e-05	0.00111202	1	1
PFDN5	-4.98424	-1.23885	7.97239e-05	0.00203102	1	1
FLVCR1	-4.98239	-1.18532	5.95595e-05	0.00155716	1	1
SRP54	-4.98047	-1.51154	0.00023968	0.00544485	1	1
HIC2	-4.97674	-1.30258	0.000111758	0.00275653	1	1
RPS16	-4.97315	-1.14282	4.77992e-05	0.00128374	1	1
PCNA	-4.96823	-1.13847	4.79902e-05	0.00128444	1	1
RPS9	-4.96186	-1.24515	9.19948e-05	0.00231388	1	1
MTF1	-4.95865	-0.961654	6.95157e-07	2.59889e-05	1	1
RPL7L1	-4.95681	-1.30113	0.000120967	0.00295912	1	1
SUGP1	-4.95616	-1.02196	1.63604e-05	0.000488477	1	1
CPSF3L	-4.94402	-1.39388	0.000181752	0.00427033	1	1
YARS	-4.9388	-1.12673	5.41462e-05	0.00143475	1	1
COQ6	-4.92727	-1.1362	6.17813e-05	0.00160371	1	1
SSU72	-4.92559	-1.24829	0.000110236	0.00272655	1	1
EIF1AX	-4.92527	-1.27228	0.000122338	0.00298856	1	1
CLSPN	-4.92136	-1.3033	0.000140958	0.00339691	1	1
MED17	-4.91696	-1.18783	8.65828e-05	0.00219011	1	1
CHMP4B	-4.9128	-1.06665	4.25126e-05	0.00115568	1	1
ERCC1	-4.90767	-1.18483	8.93021e-05	0.00225251	1	1
LARS2	-4.8862	-1.02796	3.85996e-05	0.0010672	1	1
PSMD8	-4.88556	-1.06447	5.09764e-05	0.00135479	1	1
UBE2D3	-4.88486	-1.1325	7.6865e-05	0.00196796	1	1
PSMB4	-4.883	-1.10168	6.54541e-05	0.00169657	1	1
AARS	-4.88121	-1.33054	0.000181404	0.00426778	1	1
RCC1	-4.87967	-1.26555	0.000143153	0.00344513	1	1
MRPL39	-4.86056	-1.14913	9.4343e-05	0.00236295	1	1
TRMT6	-4.86016	-1.34471	0.000205174	0.00473333	1	1
RIOK1	-4.8567	-1.02708	4.80412e-05	0.00128444	1	1
WARS2	-4.85398	-0.9683	3.01128e-05	0.000844341	1	1
EXOSC6	-4.85339	-1.29223	0.000174695	0.00412626	1	1
IMP4	-4.85248	-1.08488	7.07678e-05	0.00182107	1	1
GNL3L	-4.85061	-1.00204	4.17184e-05	0.00113756	1	1
SHQ1	-4.84968	-1.16404	0.000106234	0.00264221	1	1
TINF2	-4.846	-1.023	5.03126e-05	0.00133914	1	1
PPCDC	-4.84277	-1.01391	4.82993e-05	0.0012894	1	1
DIDO1	-4.8399	-0.997605	4.37821e-05	0.00118838	1	1
MED20	-4.83961	-1.34587	0.000220824	0.00506816	1	1
MBOAT7	-4.83896	-0.985309	4.00713e-05	0.00110447	1	1
SRBD1	-4.83873	-1.03667	5.77388e-05	0.00152316	1	1
ZNHIT6	-4.83466	-1.36997	0.000243012	0.00550652	1	1
PPIL1	-4.83108	-1.1632	0.000114841	0.00282867	1	1
FAU	-4.83058	-1.26042	0.000169053	0.0040036	1	1
MASTL	-4.82877	-1.11601	9.37483e-05	0.00235135	1	1
H2AFX	-4.8245	-1.18007	0.000126761	0.00307973	1	1
HBS1L	-4.817	-1.13493	0.000107938	0.00267714	1	1
RPS3	-4.81484	-1.29344	0.00020102	0.00465757	1	1
ELP6	-4.81052	-0.888284	1.96093e-05	0.000577051	1	1
CABIN1	-4.8098	-1.292	0.000203528	0.00470755	1	1
NDUFAF5	-4.80773	-1.20572	0.000150025	0.00359688	1	1
EEF1G	-4.79635	-1.115	0.00010828	0.0026819	1	1
GPN3	-4.79416	-1.11742	0.000110503	0.00272936	1	1
PTTG1	-4.7819	-1.25235	0.00019543	0.00456165	1	1
MRPL19	-4.7755	-0.895346	3.1779e-05	0.000886879	1	1
NXF1	-4.77199	-1.17983	0.000155768	0.00372361	1	1
AARS2	-4.76407	-1.24796	0.000204714	0.00472884	1	1
RPL4	-4.75427	-1.10182	0.000122614	0.00299122	1	1
EIF2S3	-4.74681	-1.08438	0.000117552	0.00289146	1	1
PSMD11	-4.74226	-0.752921	2.48593e-06	8.44413e-05	1	1
RPL12	-4.74081	-0.939574	5.80394e-05	0.00152729	1	1
INO80B	-4.7352	-1.15962	0.000165716	0.00393503	0.640353	1
DDX10	-4.72866	-1.32993	0.000299276	0.00667958	1	1
TAF1C	-4.72671	-1.2736	0.000252284	0.00570214	1	1
MRPL15	-4.72531	-1.16975	0.000178251	0.00420469	1	1
YLPM1	-4.72406	-1.25608	0.000240426	0.00545486	1	1
SMARCE1	-4.72241	-0.81012	2.23802e-05	0.000649945	1	1
DDX52	-4.72231	-0.945208	6.70688e-05	0.00173339	1	1
ABHD11	-4.71462	-1.11267	0.000150063	0.00359688	1	1
CCAR1	-4.70606	-1.06922	0.000130756	0.00316816	1	1
HNRNPU	-4.70562	-1.11062	0.000154095	0.00368857	1	1
NOL8	-4.69466	-1.03639	0.00011965	0.00293495	1	1
PPP1R15B	-4.69233	-1.06522	0.000135988	0.00328157	1	1
ERH	-4.68083	-1.2651	0.00028395	0.00636141	1	1
MBD3	-4.66693	-1.09311	0.000166802	0.00395556	1	1
CDCA3	-4.66358	-1.05217	0.000144675	0.00347708	1	1
ZNF511	-4.66124	-1.13996	0.000201106	0.00465757	1	1
FUBP1	-4.65643	-1.00955	0.000125488	0.00305296	1	1
UBA3	-4.64478	-0.982794	0.000117777	0.002893	1	1
EIF5A	-4.64428	-1.25395	0.000307072	0.00682796	1	1
DHX9	-4.64097	-0.725153	2.13892e-05	0.000623257	0.980167	1
RAD17	-4.63267	-1.04319	0.000157349	0.00375635	1	1
MRPS17	-4.63104	-0.936139	0.000101881	0.00254459	1	1
ASF1A	-4.6296	-1.1829	0.000257512	0.00581293	1	1
GSPT1	-4.61327	-1.03122	0.000161786	0.00385611	1	1
WDR1	-4.61017	-0.818381	6.15157e-05	0.00159914	0.1837	1
UTP3	-4.6072	-1.21124	0.000301828	0.00672813	1	1
PBX2	-4.60679	-1.06866	0.000189648	0.00444414	1	1
SLC25A26	-4.60546	-1.16267	0.000260749	0.00587855	1	1
PAGR1	-4.60109	-1.06333	0.0001899	0.00444421	1	1
ZNF622	-4.59871	-1.11284	0.000226685	0.00518272	1	1
NANS	-4.59765	-1.0453	0.000180313	0.00424772	1	1
SREBF1	-4.59176	-1.1059	0.000226698	0.00518272	1	1
WDR26	-4.58582	-0.938482	0.000125247	0.00305126	1	1
DBF4	-4.58449	-1.24343	0.000355975	0.00777	1	1
EIF2B4	-4.57596	-1.1991	0.000319893	0.00708653	1	1
TERF2	-4.57474	-1.09715	0.000232974	0.00529927	1	1
TCP1	-4.56101	-1.13773	0.000277328	0.00622087	1	1
DDOST	-4.55861	-1.01659	0.000187069	0.00438948	1	1
GATAD2A	-4.5583	-1.21939	0.000358236	0.00780981	1	1
WDR3	-4.55713	-0.645428	2.25448e-05	0.000652665	1	1
NCAPG	-4.54873	-0.796496	7.69174e-05	0.00196796	1	1
TTI1	-4.54053	-1.16485	0.000321037	0.00710305	1	1
SLC7A1	-4.53776	-1.16564	0.000324504	0.00717086	1	1
POP4	-4.52825	-1.07384	0.00025123	0.00568552	1	1
DHODH	-4.52305	-1.22189	0.000399851	0.00864308	1	1
SNRPC	-4.51412	-1.10161	0.000286801	0.00641722	1	1
ZNF808	-4.50696	-0.849577	0.000120096	0.00294187	1	1
RPS27A	-4.50024	-0.978785	0.000200983	0.00465757	1	1
CRNKL1	-4.48734	-1.20282	0.000419373	0.00899962	1	1
NDUFC1	-4.4824	-0.956506	0.000197926	0.00460784	1	1
SLC35A1	-4.48032	-1.07984	0.000297674	0.00665215	1	1
INTS10	-4.47955	-1.20868	0.000435947	0.00933283	1	1
NOP10	-4.47031	-0.943648	0.000197397	0.00460154	1	1
MOCS3	-4.46907	-1.0836	0.000311647	0.00692105	1	1
CHAF1A	-4.46275	-1.14004	0.000375655	0.00817956	1	1
ZNRD1	-4.46169	-1.08251	0.000317654	0.00704567	1	1
CUL1	-4.46027	-1.25568	0.000524331	0.0110787	1	1
TMEM147	-4.45381	-0.942599	0.000208172	0.00479628	1	1
CCDC115	-4.44919	-1.13679	0.000387078	0.00839752	1	1
RPLP1	-4.44656	-1.01365	0.000269049	0.00605039	1	1
RPS12	-4.43788	-1.28375	0.000601255	0.0125847	1	1
RPL19	-4.4361	-1.041	0.000302623	0.00673743	1	1
NAA20	-4.43057	-1.12067	0.000389892	0.00844037	1	1
CDC6	-4.42834	-1.07007	0.000338257	0.00742875	1	1
WAC	-4.41896	-1.10916	0.000389999	0.00844037	1	1
DKC1	-4.41891	-1.17101	0.000465062	0.00993229	1	1
GTF2H4	-4.40606	-0.901445	0.000212888	0.00489863	1	1
DAP3	-4.39679	-1.10916	0.000415671	0.00894168	1	1
GTPBP8	-4.39544	-1.09838	0.0004046	0.00873515	1	1
LDB1	-4.3944	-1.03207	0.000334178	0.00735727	1	1
TCEB1	-4.39269	-1.07102	0.00037679	0.00819426	1	1
MRPL28	-4.38902	-1.09812	0.000411801	0.00887986	1	1
MED31	-4.38742	-1.09861	0.000414272	0.00892236	1	1
LILRA6	-4.38727	-0.883389	0.000213411	0.00490434	1	1
ZNF131	-4.38558	-0.818849	0.000171185	0.00404873	1	1
MEAF6	-4.37103	-1.02324	0.000348961	0.00763562	1	1
ADAMTS10	-4.367	-0.836064	0.000194488	0.00454561	1	1
EIF2B3	-4.36031	-1.00827	0.000344593	0.00754929	1	1
RPN2	-4.35469	-1.14374	0.000515242	0.0108995	1	1
CCNK	-4.35365	-0.868167	0.000226979	0.00518272	1	1
TSC22D2	-4.35186	-1.20719	0.00061669	0.0128679	1	1
RANBP9	-4.34823	-0.919292	0.000272443	0.006119	1	1
PMPCB	-4.34146	-1.28598	0.00078007	0.0157721	1	1
ATXN10	-4.3409	-0.988756	0.000344483	0.00754929	1	1
DNAAF5	-4.33879	-0.902932	0.000266557	0.0060019	1	1
CDC123	-4.33757	-1.17642	0.000589996	0.0123781	1	1
ALG2	-4.32969	-1.1837	0.00061451	0.0128471	1	1
ATP6AP2	-4.32453	-0.748122	0.000165212	0.00392829	1	1
CPSF1	-4.32052	-1.20417	0.000664977	0.0136935	1	1
MRPL17	-4.31382	-0.945073	0.000327811	0.00723497	1	1
SCAP	-4.31211	-1.09603	0.000508017	0.0107723	1	1
MCM10	-4.31174	-1.09753	0.000510651	0.0108152	1	1
SMARCD1	-4.30108	-0.958008	0.000353869	0.00773351	1	1
POLRMT	-4.29972	-1.18655	0.000670607	0.013781	1	1
ERAL1	-4.29921	-1.18657	0.000671547	0.013781	1	1
RNASEK	-4.29525	-1.14082	0.000600763	0.0125847	1	1
RPS15	-4.29269	-0.808246	0.000227761	0.00519394	1	1
PDCL	-4.28368	-0.962822	0.000377687	0.00820376	1	1
ANAPC2	-4.28348	-1.19716	0.000719746	0.0146856	1	1
ACTR2	-4.2815	-1.17996	0.00069152	0.0141746	1	1
QRSL1	-4.28034	-1.20334	0.000737534	0.0150026	1	1
GTF2E2	-4.27778	-0.752551	0.00019838	0.00461241	0.239659	1
TXN2	-4.27416	-1.19731	0.000737807	0.0150026	1	1
RNPS1	-4.26663	-1.13063	0.000631142	0.0130874	1	1
DNLZ	-4.26405	-1.08762	0.000566141	0.0119057	1	1
SS18L2	-4.2586	-1.20624	0.000786407	0.0158473	1	1
NONO	-4.24231	-1.07128	0.00057447	0.0120666	1	1
RPL28	-4.2387	-1.15627	0.000727111	0.0148189	1	1
SDE2	-4.23661	-0.756585	0.00023111	0.00526358	1	1
TCEB2	-4.22877	-0.860806	0.000328585	0.0072431	1	1
CCDC51	-4.21967	-0.971067	0.000464154	0.00992477	1	1
AIFM1	-4.21966	-0.99757	0.000499672	0.0106079	1	1
MCM4	-4.21829	-1.07577	0.000620245	0.0129215	1	1
FANCG	-4.21368	-1.14183	0.000747521	0.0151656	1	1
PPP1R12A	-4.20771	-1.07154	0.000630862	0.0130874	1	1
MRGBP	-4.19232	-0.704324	0.000225089	0.00515939	1	1
GTF2F1	-4.17788	-1.28444	0.00117807	0.0226332	1	1
TGS1	-4.17447	-1.18173	0.000916874	0.0181472	1	1
NAA50	-4.17302	-1.36301	0.00144877	0.0271386	1	1
EIF3A	-4.17154	-1.07102	0.00069339	0.0141966	1	1
NCAPD3	-4.15884	-1.06589	0.00070732	0.0144652	1	1
ZPR1	-4.15257	-0.910663	0.000472924	0.0100881	1	1
ADSS	-4.14228	-1.16506	0.000953837	0.0187126	1	1
POLA2	-4.14173	-1.02094	0.000657194	0.0135488	1	1
SRP14	-4.14071	-1.16867	0.000966484	0.0189191	1	1
KRI1	-4.13387	-1.08282	0.000789088	0.0158824	1	1
EIF4ENIF1	-4.1327	-0.988187	0.000616948	0.0128679	1	1
PHAX	-4.13104	-0.902442	0.000490748	0.0104558	1	1
DCTN1	-4.11811	-0.833094	0.000418779	0.00899769	1	1
TRMT5	-4.10546	-1.08987	0.000864738	0.01723	1	1
MIIP	-4.10506	-0.92191	0.000555916	0.0117044	1	1
POLG	-4.08879	-1.15043	0.0010525	0.0204014	1	1
RPAIN	-4.07682	-0.964178	0.000671531	0.013781	1	1
MED26	-4.07483	-0.999027	0.000739838	0.0150268	1	1
SASS6	-4.06752	-1.07988	0.000928847	0.0183435	1	1
POLE2	-4.04291	-1.04957	0.000915441	0.0181472	1	1
MRPL24	-4.03656	-0.984214	0.000786454	0.0158473	1	1
ZCCHC7	-4.02252	-0.884459	0.000627685	0.0130613	1	1
CNOT11	-4.017	-0.879558	0.000628708	0.0130673	1	1
LAMTOR3	-4.01599	-0.82849	0.000549384	0.0115806	1	1
ATP5J2	-4.01517	-1.0154	0.000900526	0.0179231	1	1
RANBP1	-4.01202	-0.430258	0.00016196	0.00385611	1	1
CHAF1B	-4.01201	-0.992495	0.000856062	0.0170954	1	1
RBBP6	-4.00682	-1.03258	0.000961109	0.0188346	1	1
EPC2	-4.00471	-1.13735	0.00125718	0.0239267	1	1
SMG6	-4.00409	-0.988166	0.000863988	0.01723	1	1
ATP5O	-4.00168	-1.05649	0.00103453	0.0201405	1	1
NUP50	-3.99908	-1.0584	0.00104635	0.0203263	1	1
ZC3H13	-3.99691	-0.721471	0.000430347	0.00922402	1	1
ELOF1	-3.99376	-0.868365	0.000649217	0.0134154	1	1
ABHD13	-3.98511	-0.760132	0.000495694	0.0105486	1	1
TMX2	-3.98424	-1.00009	0.000937169	0.0184465	1	1
CDT1	-3.96483	-0.605415	0.0003371	0.00741245	1	1
WRAP73	-3.96407	-0.98138	0.000940667	0.0184949	1	1
NDUFB3	-3.96071	-0.836418	0.000651125	0.0134393	1	1
PRMT1	-3.95932	-0.76278	0.000535999	0.0113118	1	1
PSMD14	-3.95785	-0.869878	0.000716639	0.014639	1	1
CCDC130	-3.95071	-1.03525	0.00111491	0.0215408	1	1
TRUB2	-3.94224	-0.956016	0.000932236	0.01839	1	1
SDHA	-3.9252	-0.891592	0.000825529	0.0165041	1	1
VPS45	-3.91921	-0.938876	0.000946323	0.0185857	1	1
PTPN1	-3.9161	-0.865584	0.000790191	0.0158867	1	1
TRAPPC3	-3.91111	-0.877414	0.000825338	0.0165041	1	1
SFXN4	-3.90806	-0.914965	0.000916036	0.0181472	1	1
ACTR1A	-3.90667	-1.0556	0.00130906	0.0248345	1	1
FBXO28	-3.90121	-0.851158	0.000791138	0.015887	1	1
TPRKB	-3.89843	-0.936645	0.000991984	0.0193545	1	1
GFM2	-3.89733	-0.76666	0.000640161	0.0132436	1	1
GTF2A2	-3.89362	-0.822742	0.000749423	0.0151807	1	1
KTI12	-3.87644	-0.983329	0.00117906	0.0226332	1	1
VBP1	-3.86258	-1.1503	0.0018396	0.0337505	1	1
RAD9A	-3.86147	-0.9478	0.00111992	0.0216142	1	1
THAP11	-3.86022	-1.02541	0.00136285	0.0257182	1	1
ZFX	-3.85586	-1.05058	0.00146574	0.0274276	1	1
CAB39	-3.85334	-0.722019	0.000639051	0.013236	1	1
TBCC	-3.84629	-1.03037	0.00142786	0.0268313	1	1
BANF1	-3.84629	-1.22354	0.00228366	0.0409704	1	1
APEX2	-3.84427	-0.982606	0.00127511	0.0242421	1	1
NSMCE4A	-3.84381	-1.08083	0.00162593	0.0302294	1	1
CHMP6	-3.8424	-1.18854	0.00211894	0.0382847	1	1
MYB	-3.84098	-1.01771	0.00140222	0.0264332	1	1
EMC4	-3.83895	-0.995026	0.00133244	0.0252244	1	1
HAUS5	-3.82532	-0.754725	0.000749967	0.0151807	1	1
RPP38	-3.82265	-0.887424	0.00106084	0.0205407	1	1
PSMC5	-3.82189	-0.981302	0.0013435	0.0254068	1	1
SEPHS2	-3.8102	-0.825878	0.000936759	0.0184465	1	1
ZBTB17	-3.80894	-0.7593	0.000791988	0.015887	1	1
VCPIP1	-3.80025	-0.953616	0.00132354	0.0250826	1	1
NELFCD	-3.79686	-1.0352	0.00163115	0.0302483	1	1
CDYL	-3.78731	-1.0984	0.00194687	0.0354996	1	1
DDX51	-3.78547	-0.822979	0.000990196	0.0193408	1	1
ANKLE2	-3.78421	-0.729253	0.000781141	0.0157759	1	1
IPO9	-3.78102	-0.889355	0.00118331	0.0226904	1	1
ARFRP1	-3.77327	-1.06533	0.00185915	0.0340707	1	1
MRPS24	-3.7697	-1.18963	0.00252985	0.0444919	1	1
TBCD	-3.75842	-0.87643	0.00121222	0.0231699	1	1
PAX2	-3.75601	-0.873683	0.00121121	0.0231699	1	1
EIF3F	-3.75553	-1.01284	0.00170847	0.0315395	1	1
RPL8	-3.7487	-0.926806	0.00140696	0.0264946	1	1
AKIRIN2	-3.7461	-1.15855	0.00248498	0.0438758	1	1
CHFR	-3.71789	-0.495648	0.000499464	0.0106079	1	1
CMAS	-3.7158	-1.06703	0.00214508	0.0386786	1	1
SRPRB	-3.7102	-0.947577	0.00162733	0.0302294	1	1
GNG5	-3.7078	-0.74333	0.000985254	0.0192654	1	1
ARIH1	-3.69871	-0.814166	0.00120453	0.0230725	1	1
NEDD1	-3.69616	-1.03386	0.00207621	0.037589	1	1
MRPL37	-3.6932	-0.694877	0.000903879	0.0179698	1	1
E2F4	-3.68682	-0.957499	0.00176502	0.0325497	1	1
WRAP53	-3.68481	-1.14603	0.00279216	0.0487208	1	1
C11orf57	-3.683	-0.789077	0.00117666	0.0226332	1	1
DHX37	-3.6716	-1.12347	0.00273053	0.0477388	1	1
KIF23	-3.66077	-0.880094	0.001557	0.0289832	1	1
SLC30A1	-3.65929	-0.907789	0.00167214	0.0309328	1	1
REEP4	-3.65853	-0.856035	0.0014758	0.027587	1	1
SPAG7	-3.65824	-0.733156	0.00108828	0.0210491	1	1
KDM1A	-3.6578	-0.846883	0.00144555	0.0271068	1	1
MRPS18A	-3.65558	-0.988165	0.00205074	0.0372033	1	1
ZNF592	-3.65173	-0.983215	0.0020453	0.0371424	1	1
DDX27	-3.6513	-0.854471	0.00149649	0.0279152	0.43227	1
CDCA5	-3.63701	-0.782116	0.00129673	0.0246268	1	1
MRPL9	-3.63635	-0.799951	0.00135747	0.0256438	1	1
NDOR1	-3.63493	-0.757278	0.00122541	0.0233719	0.261687	1
SMNDC1	-3.63442	-1.07213	0.00263978	0.0462883	1	1
INTS6	-3.6317	-0.945698	0.00196064	0.035714	1	1
ZMAT5	-3.63098	-1.01421	0.00231676	0.0414807	1	1
TSEN15	-3.63052	-0.934465	0.00191345	0.0349975	1	1
SCAF8	-3.6236	-0.723075	0.0011574	0.0223134	1	1
EXOSC5	-3.61604	-0.795588	0.00141199	0.0265611	1	1
DUT	-3.60958	-0.960186	0.00214185	0.0386595	1	1
DDX49	-3.60819	-0.658528	0.0010229	0.0199359	1	1
RAD51D	-3.60286	-1.07583	0.00287147	0.0500068	1	1
NUP153	-3.60074	-0.720514	0.00121758	0.0232474	0.377564	1
WDR36	-3.60054	-0.984826	0.00232264	0.0415442	1	1
TRMT10C	-3.59935	-0.60347	0.000909531	0.018062	1	1
MTOR	-3.59359	-1.01148	0.00251752	0.0443187	1	1
TFB1M	-3.59352	-0.602354	0.000920554	0.0181998	1	1
ACD	-3.58935	-1.0733	0.0029476	0.0511328	1	1
NARS2	-3.58908	-0.843851	0.0016979	0.0313769	1	1
DNAJC8	-3.58795	-0.985997	0.00240065	0.0426827	1	1
DDX39B	-3.5778	-0.983204	0.00244333	0.043277	1	1
IDH3B	-3.57653	-0.882728	0.00192396	0.0351536	1	1
WDR55	-3.5726	-0.933413	0.00219514	0.0395014	1	1
MED18	-3.56436	-1.15743	0.00381798	0.0641112	1	1
CENPU	-3.5623	-0.949758	0.00234036	0.0417357	1	1
FH	-3.5616	-1.00229	0.00265865	0.0465733	1	1
KMT2A	-3.56083	-0.759339	0.00147946	0.0276264	1	1
COX6A1	-3.55628	-0.614336	0.00104303	0.0202839	1	1
RPL36A	-3.55501	-0.615155	0.00104855	0.0203468	1	1
TTC27	-3.55302	-1.03367	0.00292445	0.0507806	1	1
MED13L	-3.55226	-1.04592	0.00301642	0.052225	1	1
RAD21	-3.5472	-0.785678	0.00163174	0.0302483	1	1
NUP62	-3.5463	-0.731601	0.00143214	0.0268836	1	1
PPP4C	-3.54499	-0.979883	0.00262202	0.0460221	1	1
KCMF1	-3.54035	-1.09175	0.00345964	0.0589509	1	1
HNRNPK	-3.52885	-0.919851	0.00236037	0.0420504	1	1
MRPS25	-3.52369	-0.889135	0.00221978	0.0399045	1	1
SURF1	-3.5212	-0.851203	0.00203799	0.0370474	1	1
PIAS1	-3.51355	-0.79345	0.00180502	0.0331844	1	1
ZBTB11	-3.50865	-0.61377	0.00117384	0.022606	1	1
NMD3	-3.50858	-1.11286	0.00392045	0.0655556	1	1
GART	-3.49757	-0.702228	0.00150197	0.0279882	1	1
TCOF1	-3.48402	-1.01319	0.00328198	0.0563307	1	1
NCAPD2	-3.48106	-1.06971	0.00377833	0.0635051	1	1
SRM	-3.47438	-0.949913	0.00288906	0.0502639	1	1
RPRD1B	-3.47407	-1.2275	0.00556788	0.0897759	1	1
CD3EAP	-3.46789	-1.02438	0.00350151	0.059469	1	1
AEBP2	-3.4671	-1.01428	0.00342522	0.0585076	1	1
NUP155	-3.46617	-0.811623	0.00211539	0.0382593	1	1
SMG5	-3.46583	-0.877968	0.00248308	0.0438758	1	1
CLPP	-3.45945	-1.03055	0.00362471	0.061386	1	1
PA2G4	-3.45586	-0.414398	0.000808948	0.016209	1	1
SPATA5	-3.45568	-0.870184	0.00249721	0.0440047	1	1
CABP4	-3.45431	-0.583702	0.00124706	0.0237595	1	1
NCLN	-3.45072	-0.731293	0.00180797	0.0332045	1	1
TRNT1	-3.44946	-0.697384	0.00166979	0.0309215	1	1
POLR3B	-3.43923	-0.760878	0.00199722	0.0363432	1	1
PSMF1	-3.42593	-1.00152	0.00366343	0.0619241	1	1
ANAPC11	-3.41436	-0.966424	0.00346505	0.0589621	1	1
SMARCD2	-3.41363	-0.863939	0.00272039	0.0476081	1	1
GNE	-3.412	-0.821835	0.00246941	0.0436874	1	1
ZNF92	-3.41152	-0.81211	0.00241529	0.0428575	1	1
RPL37	-3.4107	-0.786157	0.00227386	0.0408356	1	1
CWC15	-3.41023	-0.966364	0.00349859	0.059469	1	1
PSMA2	-3.40932	-0.716887	0.00193033	0.0352339	1	1
SAFB	-3.40666	-0.975455	0.00360506	0.0611113	1	1
HIRA	-3.40123	-0.760276	0.00218583	0.0393737	1	1
JMJD1C	-3.39817	-0.903258	0.00309957	0.0535089	1	1
POLR1E	-3.39674	-0.689188	0.00186087	0.0340707	1	1
APEX1	-3.37855	-0.917465	0.00335874	0.0574271	1	1
SLC25A19	-3.37803	-0.91056	0.00330821	0.0566718	1	1
CCNB1	-3.37772	-0.649817	0.00177108	0.0326277	1	1
SUGT1	-3.37086	-0.975339	0.00392238	0.0655556	1	1
RMI2	-3.36542	-0.745827	0.00230106	0.0412409	1	1
TARS2	-3.36484	-0.90185	0.00334362	0.0572234	1	1
NDUFV1	-3.36216	-0.757991	0.00238791	0.0424987	1	1
GTF2H3	-3.34295	-0.869405	0.00326092	0.0560772	1	1
U2AF2	-3.3358	-0.811938	0.0028932	0.0502869	1	1
RPL34	-3.3339	-0.671031	0.00207334	0.037575	1	1
RCL1	-3.32883	-0.851357	0.00323064	0.05561	1	1
USPL1	-3.32236	-0.962	0.00426149	0.070759	1	1
PABPC1	-3.32054	-0.726021	0.00244378	0.043277	1	1
PDSS1	-3.32016	-0.821232	0.00307011	0.0530516	1	1
GCSH	-3.30596	-0.837374	0.00329952	0.0565772	1	1
MLST8	-3.30008	-0.88785	0.00377049	0.0634331	1	1
SNAPC3	-3.29471	-0.874129	0.00369684	0.0623117	1	1
MED27	-3.29306	-1.04152	0.0055034	0.0888968	1	1
MRPS14	-3.28947	-1.02571	0.00534801	0.0868589	1	1
ZNF407	-3.28527	-0.954759	0.00457188	0.0751431	1	1
GRSF1	-3.27845	-0.912282	0.00420359	0.0698627	1	1
DDI2	-3.2769	-0.967469	0.00480422	0.0788892	1	1
VPRBP	-3.27139	-0.995222	0.00519459	0.0846755	1	1
GTF3C5	-3.26427	-0.649756	0.00232933	0.0415806	1	1
RNASEH2C	-3.2637	-0.861448	0.00386048	0.0647639	1	1
XRN2	-3.26204	-0.685355	0.00255042	0.0448096	1	1
RPUSD4	-3.26085	-0.748533	0.00297382	0.0515376	1	1
OXA1L	-3.25128	-0.87901	0.00414358	0.0690584	1	1
BECN1	-3.24975	-0.799226	0.00344389	0.0587702	1	1
PCID2	-3.24877	-0.849164	0.00388473	0.0651094	1	1
MYH4	-3.24617	-0.811517	0.00357578	0.0606726	1	1
ABCD4	-3.24097	-1.09219	0.00699936	0.109395	1	1
CNOT10	-3.23382	-0.860973	0.00413792	0.0690392	1	1
VPS29	-3.22756	-0.746443	0.00320282	0.0551845	1	1
CHD1	-3.22706	-0.830908	0.0039165	0.0655556	1	1
MIPEP	-3.22404	-0.925409	0.00492766	0.0806932	1	1
NUP188	-3.22307	-0.802207	0.00369439	0.0623117	1	1
NDUFB10	-3.20508	-1.15263	0.00876251	0.131534	1	1
BORA	-3.20361	-0.777864	0.00365189	0.0617876	1	1
COQ3	-3.19644	-0.857478	0.00448179	0.073935	1	1
PDCD6	-3.19596	-0.595823	0.00241108	0.0428255	1	1
SLCO1B7	-3.19484	-0.649887	0.00275134	0.0480554	1	1
ICT1	-3.19378	-0.606804	0.00248835	0.0438919	0.577031	1
INCENP	-3.18937	-1.00518	0.00644351	0.10214	1	1
HAUS4	-3.18303	-0.697146	0.00316675	0.0546157	1	1
DCAF13	-3.18194	-0.960189	0.00590132	0.0942654	1	1
MYRF	-3.17333	-0.806883	0.00420087	0.0698627	1	1
BRCA1	-3.16743	-0.794646	0.00413856	0.0690392	1	1
UBE2H	-3.1641	-0.823245	0.00446192	0.0736754	1	1
CAP2	-3.16264	-0.738956	0.00366974	0.0619721	1	1
UQCRC2	-3.15901	-0.905764	0.00548153	0.0886239	1	1
RPL37A	-3.15422	-0.849879	0.00486206	0.0796923	1	1
PABPN1	-3.15393	-0.892078	0.00537205	0.0870906	1	1
RNF8	-3.15019	-0.650554	0.00306496	0.0530139	1	1
B3GNT2	-3.1458	-0.909069	0.00569781	0.0915735	1	1
SLC25A34	-3.13867	-0.796236	0.00444537	0.0735383	1	1
SLC38A2	-3.13571	-0.801583	0.00453308	0.0747121	1	1
CD300LG	-3.12797	-0.40685	0.00180057	0.0331367	1	1
PRPF4	-3.12287	-0.849631	0.00523039	0.085136	1	1
DYNC1H1	-3.11198	-0.879504	0.00575496	0.0921258	1	1
NELFA	-3.10533	-1.20263	0.0124111	0.178059	1	1
ECSIT	-3.10219	-0.733511	0.00417876	0.0695797	1	1
UFD1L	-3.09698	-0.946791	0.00697644	0.109132	1	1
TOP3A	-3.09095	-0.910154	0.00649483	0.102679	1	1
RBM25	-3.08668	-0.979108	0.00770601	0.118517	1	1
TAF10	-3.08358	-0.909091	0.00659132	0.104112	1	1
SNIP1	-3.08028	-0.915878	0.00674854	0.106032	1	1
TSEN34	-3.079	-0.952566	0.00737428	0.114353	1	1
ESPL1	-3.07324	-0.732313	0.00446109	0.0736754	1	1
WEE1	-3.06714	-0.618721	0.00346109	0.0589509	1	1
CCNH	-3.06377	-0.912905	0.00696543	0.109056	1	1
METAP2	-3.05202	-0.814608	0.00568884	0.0915605	1	1
CIR1	-3.04063	-0.825374	0.00599177	0.0954028	1	1
NOP9	-3.04052	-0.941447	0.0078602	0.120629	1	1
OBFC1	-3.03839	-0.909303	0.0073287	0.113745	1	1
CDK1	-3.03369	-0.852847	0.00649413	0.102679	1	1
CTDSP1	-3.03281	-0.753736	0.00515927	0.0841768	1	1
MTIF3	-3.03211	-0.930082	0.00780619	0.119903	1	1
PNPT1	-3.02633	-0.854244	0.00662838	0.104328	1	1
KDM8	-3.02461	-0.960206	0.00852171	0.128568	1	1
GUK1	-3.02397	-0.979083	0.00891796	0.133306	1	1
SLC39A7	-3.02194	-0.406826	0.00232596	0.0415619	1	1
RCC2	-3.01719	-0.668294	0.00437822	0.072562	1	1
RIC1	-3.0163	-0.921762	0.00794373	0.121537	1	1
SEC61B	-3.015	-0.921756	0.00796778	0.121652	1	1
SPDL1	-3.0121	-0.824352	0.00639013	0.101474	1	1
OTUD7A	-3.01046	-0.539081	0.0032777	0.0563114	1	1
SPC25	-3.01023	-0.473646	0.00280678	0.0489279	1	1
CRLS1	-3.0067	-0.738177	0.00528866	0.0859732	1	1
MUSTN1	-3.00567	-0.789334	0.00597663	0.0952618	1	1
HYOU1	-3.00194	-0.978843	0.0093821	0.139194	1	1
HDAC3	-2.99433	-0.85191	0.00710413	0.110838	1	1
DDX21	-2.99048	-0.741997	0.00554307	0.0894566	1	1
PCM1	-2.98608	-0.87517	0.00764622	0.117913	1	1
YRDC	-2.98508	-0.926911	0.00864648	0.13023	1	1
RNF139	-2.98412	-0.746454	0.00568543	0.0915605	1	1
CCP110	-2.98361	-0.627505	0.00430445	0.0714059	1	1
RRM1	-2.98145	-0.633917	0.00439227	0.0727273	0.994453	1
SEC61A1	-2.98123	-0.764961	0.00597757	0.0952618	1	1
TRIT1	-2.97933	-0.922545	0.00867431	0.130539	1	1
ABT1	-2.96784	-0.848618	0.00749946	0.116092	1	1
AKT2	-2.96392	-0.729838	0.0057333	0.0918916	1	1
NARFL	-2.96196	-0.866799	0.00793232	0.121527	1	1
ZNF564	-2.95235	-0.906687	0.00890192	0.133178	1	1
IPO13	-2.94869	-0.762077	0.00640716	0.101654	1	1
HAUS6	-2.94729	-0.692395	0.00546036	0.0884419	1	1
CENPE	-2.94727	-0.914222	0.00916719	0.136346	1	1
BAHD1	-2.94229	-0.808241	0.00724423	0.11263	1	1
SEC16A	-2.94053	-0.900876	0.00902734	0.134723	1	1
IER2	-2.9389	-0.903066	0.00910791	0.135577	1	1
GNB1L	-2.9375	-0.715972	0.00590447	0.0942654	1	1
CDC5L	-2.93742	-0.939696	0.00995264	0.146822	1	1
CCT8	-2.92957	-0.863401	0.00848671	0.128172	1	1
CAPZB	-2.91811	-1.06432	0.0139028	0.196301	1	1
CWC22	-2.9179	-0.584212	0.00453784	0.0747214	0.555363	1
MTFMT	-2.90849	-0.885347	0.00938117	0.139194	1	1
RAB7A	-2.89504	-0.785094	0.00766349	0.118016	1	1
PGLS	-2.89141	-0.667305	0.00586896	0.0938665	1	1
CSTF1	-2.88777	-0.715423	0.00662438	0.104328	1	1
TIPIN	-2.88672	-0.897203	0.0101443	0.149014	1	1
ALYREF	-2.88608	-0.579405	0.00483542	0.0793284	1	1
GOT1L1	-2.88336	-0.598177	0.00508581	0.0831304	1	1
GATAD1	-2.88214	-0.598646	0.00510597	0.0833836	1	1
TIMELESS	-2.87788	-1.08294	0.0159347	0.221484	1	1
SPC24	-2.87153	-0.598451	0.00523238	0.085136	1	1
DDRGK1	-2.86749	-0.693673	0.00660167	0.104184	1	1
GPI	-2.86438	-0.691594	0.00661753	0.104328	1	1
NUFIP2	-2.86124	-0.94433	0.0120085	0.172699	1	1
YEATS2	-2.85829	-0.83439	0.00936458	0.139166	1	1
DDX28	-2.85511	-0.937081	0.0119774	0.172391	1	1
GEMIN2	-2.85409	-0.68852	0.00673009	0.105836	1	1
ICMT	-2.8537	-0.690674	0.00677021	0.106279	1	1
MRPS28	-2.85295	-0.728938	0.00741608	0.114901	1	1
ESRRG	-2.85128	-0.589086	0.00536771	0.0870906	1	1
HSP90AB1	-2.85121	-0.833552	0.00950157	0.140849	1	1
CCT4	-2.84941	-1.06491	0.0163249	0.226378	1	1
RPL36	-2.84121	-0.847416	0.0100438	0.147782	1	1
FSHB	-2.83538	-0.422019	0.00376048	0.0633246	1	1
NDUFA2	-2.83214	-0.714323	0.00752394	0.11637	1	1
PGS1	-2.82879	-0.775956	0.00875457	0.131525	1	1
MOB4	-2.82438	-0.713689	0.00765017	0.117913	1	1
DMAP1	-2.82299	-0.784285	0.00904732	0.134788	1	1
PAXBP1	-2.82034	-0.487832	0.00455043	0.0748597	1	1
VPS16	-2.80751	-0.894571	0.0121196	0.174017	1	1
TAF6	-2.8022	-0.739353	0.00855269	0.128927	1	1
NHP2	-2.80097	-0.887331	0.0121001	0.173876	1	1
TPX2	-2.80014	-0.93171	0.0134385	0.190652	1	1
NUDC	-2.7792	-0.545255	0.00573518	0.0918916	1	1
HNRNPA2B1	-2.77707	-0.729099	0.00885417	0.132575	1	1
GFI1B	-2.77487	-0.677881	0.00789857	0.121114	1	1
ARHGAP15	-2.77379	-0.487999	0.00507854	0.0830877	1	1
FAM60A	-2.76737	-0.961148	0.0155235	0.21628	1	1
ARID2	-2.76439	-0.677333	0.00808351	0.122998	1	1
GRPEL1	-2.76229	-0.904391	0.0137707	0.194745	1	1
DLD	-2.75963	-0.684223	0.00830615	0.125848	0.237081	1
SNX11	-2.75093	-0.595405	0.00689	0.10797	1	1
MBTPS1	-2.75077	-0.634457	0.00755041	0.116678	1	1
LCOR	-2.74977	-0.514906	0.00572289	0.0918599	1	1
ATP5B	-2.74931	-0.820169	0.0116722	0.16868	1	1
ATXN7L3	-2.74743	-0.493676	0.00547497	0.0885982	1	1
NDUFS5	-2.74661	-0.748948	0.00995392	0.146822	1	1
SDHAF2	-2.74285	-0.84146	0.0124489	0.178314	1	1
HGS	-2.74052	-0.600375	0.00714192	0.111233	1	1
RNGTT	-2.73851	-0.878483	0.0137031	0.193942	1	1
URM1	-2.73703	-0.65177	0.00811745	0.123409	1	1
UFL1	-2.73373	-0.982598	0.0176365	0.240636	1	1
GYPA	-2.73068	-0.722583	0.00971535	0.14366	1	1
SLTM	-2.73024	-0.548546	0.00648124	0.102647	1	1
ATP5D	-2.72972	-0.906541	0.0149253	0.20892	1	1
PNO1	-2.72601	-0.67698	0.00883246	0.132361	1	1
BRD8	-2.7255	-0.801393	0.0118095	0.170249	1	1
MTG1	-2.7241	-0.711016	0.00960312	0.142118	1	1
RTF1	-2.72399	-0.514525	0.00607357	0.0966191	1	1
PRPF31	-2.7238	-0.8271	0.0125853	0.179979	1	1
PDZD2	-2.71983	-0.58182	0.00717763	0.111692	0.949178	1
PPIH	-2.71757	-0.744376	0.0105368	0.154145	1	1
NUDT4	-2.71376	-0.584495	0.00732564	0.113745	1	1
EXOC4	-2.71263	-0.630163	0.00817061	0.124111	1	1
ILF3	-2.7062	-0.611895	0.00794808	0.121537	1	1
DDX19A	-2.70122	-0.769753	0.0116093	0.167962	1	1
RBMXL3	-2.69945	-0.630063	0.00842342	0.127409	1	1
GGPS1	-2.69787	-0.725111	0.0105473	0.154172	1	1
BLM	-2.69563	-0.91046	0.0162996	0.226202	1	1
TBC1D13	-2.68551	-0.596454	0.00804605	0.122532	1	1
PRCC	-2.68513	-0.799621	0.0129164	0.183759	1	1
FIP1L1	-2.68505	-0.805419	0.0130937	0.185908	1	1
MPLKIP	-2.68469	-0.906636	0.0165705	0.228893	1	1
FOXM1	-2.68318	-0.853823	0.0147129	0.206433	1	1
NADSYN1	-2.67971	-0.663586	0.00953548	0.141234	1	1
DYNC1LI1	-2.67434	-0.735877	0.0114223	0.16547	1	1
LMNB1	-2.6735	-0.823699	0.014032	0.197812	1	1
SLC38A5	-2.673	-0.696716	0.0104612	0.153165	1	1
VPS28	-2.67274	-0.579907	0.00797548	0.121665	1	1
TPGS1	-2.67232	-0.723901	0.0111611	0.162081	1	1
KIF20A	-2.67212	-0.591174	0.00819945	0.124443	1	1
MRPL20	-2.67028	-0.719668	0.0111043	0.161388	1	1
GPCPD1	-2.6696	-0.578387	0.00800558	0.12202	1	1
KIF2A	-2.66554	-0.55815	0.0077093	0.118517	1	1
FAM50A	-2.66168	-0.704874	0.0109458	0.159344	1	1
EIF2S2	-2.6614	-0.878655	0.0163912	0.226944	1	1
NPLOC4	-2.6595	-0.583786	0.00830017	0.125848	1	1
STX5	-2.65738	-0.759848	0.012561	0.179776	1	1
BAZ1B	-2.65309	-0.664214	0.0101595	0.149115	1	1
KRR1	-2.65063	-0.754308	0.0125962	0.179991	1	1
TCTE1	-2.64656	-0.863196	0.0163679	0.226798	1	1
MMP11	-2.64607	-0.591531	0.00871988	0.131114	1	1
YY1AP1	-2.64071	-0.709387	0.0116132	0.167962	1	1
CDC7	-2.63997	-0.671554	0.0106543	0.155608	1	1
LSM4	-2.63567	-0.47485	0.00680527	0.106736	1	1
SERINC5	-2.62858	-0.664132	0.010753	0.156793	1	1
GTF3C6	-2.62696	-0.741302	0.012912	0.183759	1	1
GPRIN1	-2.62504	-0.428934	0.00626646	0.0995987	1	1
NUPL2	-2.62163	-0.632099	0.0101441	0.149014	1	1
PSMD12	-2.61655	-0.858635	0.0173618	0.237433	1	1
LTV1	-2.6133	-0.539623	0.00833969	0.126249	1	1
TRIM26	-2.61322	-0.468006	0.00705795	0.110214	1	1
SF1	-2.61239	-0.921973	0.0202979	0.27257	1	1
WDR11	-2.60677	-0.466411	0.0071383	0.111233	1	1
COPS3	-2.60207	-0.94176	0.0217619	0.289318	1	1
CNBP	-2.6003	-0.485031	0.00756888	0.116862	1	1
SLC1A5	-2.59734	-0.9052	0.0202171	0.271894	1	1
STIL	-2.59668	-0.617758	0.0103974	0.152356	1	1
ATAD5	-2.59357	-0.814987	0.0165502	0.22879	1	1
AZIN1	-2.59194	-0.750501	0.0143065	0.201523	1	1
C20orf24	-2.59012	-0.788945	0.0157063	0.21865	1	1
KAT8	-2.58592	-0.804626	0.0164463	0.227531	1	1
FAM96B	-2.58395	-0.757119	0.0147995	0.207321	1	1
GAPDH	-2.58224	-0.821714	0.017257	0.236363	1	1
OXSR1	-2.57695	-0.650893	0.0117561	0.169754	1	1
TRAPPC11	-2.574	-0.880383	0.020148	0.271374	1	1
ATXN2L	-2.57126	-0.884419	0.0204664	0.274419	1	1
SAP130	-2.56979	-0.570704	0.00992096	0.146579	1	1
VCX	-2.56948	-0.91209	0.0219096	0.290494	1	1
ATP5C1	-2.56864	-0.68168	0.0128731	0.183506	1	1
PPP1R11	-2.56595	-0.600884	0.0107376	0.156698	1	1
TUBB4B	-2.56176	-0.609638	0.0110655	0.160956	1	1
DCK	-2.56012	-0.565184	0.0100174	0.147636	1	1
KCNK3	-2.55768	-0.632783	0.0117879	0.170076	1	1
C19orf52	-2.55235	-0.832324	0.0189533	0.25703	1	1
TTC1	-2.54977	-0.912483	0.0229522	0.301248	1	1
RNF24	-2.54181	-0.598368	0.0112908	0.163698	1	1
GPR55	-2.54129	-0.447269	0.00795346	0.121537	1	1
EIF4E2	-2.53161	-0.972493	0.0274986	0.352033	1	1
TARDBP	-2.52762	-0.814413	0.0192549	0.260724	1	1
UQCC1	-2.52174	-0.660474	0.0136638	0.193539	1	1
ITPK1	-2.51755	-0.852872	0.0215434	0.286919	1	1
RPUSD3	-2.50926	-0.829144	0.0207872	0.278093	1	1
DENR	-2.50482	-0.83904	0.0214883	0.286398	1	1
RABIF	-2.50263	-0.86544	0.0229572	0.301248	1	1
FDXR	-2.50086	-0.461551	0.00903467	0.134723	1	1
VWA9	-2.50043	-0.599033	0.0124489	0.178314	1	1
MRPS6	-2.48501	-0.898737	0.0258256	0.333488	1	1
LTBP1	-2.48114	-0.62484	0.0138218	0.195313	1	1
INTS9	-2.48045	-0.642192	0.0144124	0.202695	1	1
DNAJA1	-2.47944	-0.777098	0.0197454	0.266757	1	1
GNPNAT1	-2.47571	-0.653727	0.0149667	0.209334	1	1
E4F1	-2.47246	-0.858782	0.0242399	0.315295	1	1
OSBP	-2.46898	-0.616423	0.0139426	0.196707	1	1
HCFC1	-2.46779	-0.603903	0.0135807	0.192516	1	1
TCF12	-2.45617	-0.560888	0.0126268	0.180283	1	1
DUSP12	-2.4479	-0.788108	0.0217879	0.289318	1	1
ATF7IP	-2.44751	-0.674094	0.0167493	0.230828	1	1
GTPBP1	-2.44581	-0.607259	0.0144027	0.202695	1	1
NKX2-8	-2.44113	-0.401855	0.00903545	0.134723	1	1
RPL29	-2.43678	-0.817384	0.0239218	0.311612	1	1
COMMD8	-2.435	-0.687393	0.0177813	0.242426	1	1
HAUS8	-2.43244	-0.847238	0.0258892	0.334068	1	1
BANP	-2.4324	-0.780403	0.0221846	0.292833	1	1
UVSSA	-2.43171	-0.380645	0.00879073	0.131846	0.116864	1
APOBEC1	-2.43027	-0.546795	0.0129775	0.184404	1	1
XPNPEP1	-2.42801	-0.444258	0.0102813	0.150778	1	1
NAIF1	-2.42654	-0.716387	0.0193916	0.262376	1	1
PRRC2A	-2.42473	-0.871311	0.0278629	0.355168	1	1
NUP93	-2.42427	-0.868765	0.0277287	0.353963	1	1
RACGAP1	-2.42274	-0.629341	0.0159916	0.222101	1	1
CTBP2	-2.41763	-0.652949	0.0170917	0.234639	1	1
ZSCAN21	-2.41757	-0.423662	0.0100414	0.147782	1	1
PRMT7	-2.41704	-0.87135	0.0283647	0.360534	1	1
SPICE1	-2.41464	-0.877728	0.0289461	0.365577	1	1
FBXO4	-2.4138	-0.792298	0.0238053	0.310548	1	1
ANAPC1	-2.40771	-0.754211	0.0221078	0.292252	1	1
UBA52	-2.40505	-0.858332	0.0282978	0.360196	1	1
SNRNP200	-2.40433	-0.768233	0.0230153	0.301789	1	1
SHOC2	-2.40041	-0.638457	0.0172	0.235763	1	1
HOXA2	-2.39557	-0.620963	0.0167034	0.230373	0.198391	1
CSRNP3	-2.39318	-0.565976	0.0147866	0.207303	1	1
PRMT2	-2.38697	-0.574646	0.0153057	0.21374	1	1
MTDH	-2.38583	-0.554064	0.014631	0.205444	1	1
TSSC1	-2.38239	-0.567604	0.0152184	0.212688	1	1
KLHL7	-2.38219	-0.725755	0.0219577	0.2907	1	1
C2orf15	-2.38093	-0.314829	0.00848823	0.128172	1	1
ENO1	-2.37493	-0.610732	0.0171108	0.234721	1	1
FANCF	-2.36931	-0.748139	0.0238236	0.31056	1	1
NPAS3	-2.3683	-0.711535	0.0219412	0.290696	1	1
RREB1	-2.36662	-0.610096	0.0174176	0.238014	1	1
IKBKAP	-2.36349	-0.674246	0.0203528	0.273101	1	1
OPA1	-2.36321	-0.642219	0.0189111	0.256779	1	1
KDSR	-2.36074	-0.772159	0.0256881	0.332221	1	1
RAD51	-2.35744	-0.853981	0.0312722	0.389712	1	1
MRPS31	-2.35228	-0.668898	0.0206309	0.276417	1	1
SLC26A4	-2.35215	-0.593618	0.0173368	0.237273	1	1
GABPB1	-2.35193	-0.690797	0.0217208	0.289065	1	1
SRP19	-2.35049	-0.766673	0.0259725	0.3349	1	1
NSL1	-2.34942	-0.834967	0.030488	0.381806	1	1
SAMM50	-2.34532	-0.783563	0.0273313	0.350143	1	1
BUB1	-2.34487	-0.741567	0.0248283	0.322479	1	1
FBRS	-2.34301	-0.888845	0.035043	0.425696	1	1
CRH	-2.34101	-0.701229	0.0228202	0.300113	1	1
MED8	-2.32712	-0.693195	0.0231313	0.302642	1	1
DPF2	-2.32352	-0.623925	0.019871	0.268049	1	1
LMO2	-2.32212	-0.730125	0.025486	0.33006	1	1
SLC39A10	-2.32198	-0.778173	0.0284883	0.361589	1	1
CCT7	-2.32129	-0.896541	0.0375056	0.450396	1	1
MUC3A	-2.31915	-0.522755	0.0158811	0.220911	1	1
RPL14	-2.31825	-0.674026	0.0225867	0.297282	1	1
B3GAT1	-2.3165	-0.358333	0.0109112	0.15897	1	1
PPP2CB	-2.31501	-0.726469	0.0256902	0.332221	1	1
COPS4	-2.30805	-0.641411	0.0214456	0.286042	1	1
MED22	-2.30493	-0.768779	0.0289969	0.365741	1	1
OTOP1	-2.30488	-0.561152	0.0179416	0.244425	1	1
IL4I1	-2.30482	-0.536459	0.0169466	0.233006	1	1
SLC44A4	-2.30371	-0.497495	0.0155239	0.21628	1	1
SPNS3	-2.30083	-0.646409	0.0220606	0.291844	1	1
RPL35	-2.2967	-0.797834	0.0316054	0.39304	1	1
CSNK1D	-2.29626	-0.858843	0.0364241	0.439778	1	1
ETNK1	-2.29306	-0.657968	0.0230688	0.302268	1	1
ATP6V0D1	-2.29235	-0.63257	0.0217885	0.289318	1	1
RNF26	-2.29117	-0.481591	0.0154031	0.214933	1	1
PRDM10	-2.27643	-0.506285	0.0168768	0.232225	1	1
ITM2C	-2.27044	-0.549621	0.0189188	0.256779	1	1
MVD	-2.26981	-0.713274	0.0276628	0.353628	1	1
ZC3H8	-2.26772	-0.711606	0.0276896	0.353717	1	1
UTP18	-2.26655	-0.432575	0.0145565	0.204559	1	1
C1QBP	-2.26637	-0.495878	0.0168631	0.232216	1	1
ZAR1L	-2.26593	-0.57038	0.0200583	0.27037	1	1
SNAPC4	-2.2658	-0.703021	0.0272663	0.349561	1	1
FANCA	-2.26533	-0.901763	0.0431941	0.505766	1	1
NOLC1	-2.26384	-0.378513	0.0129218	0.183759	0.894466	1
TPM2	-2.26211	-0.485479	0.0166251	0.22947	1	1
RPL30	-2.25851	-0.537732	0.0189204	0.256779	1	1
AKAP8L	-2.25821	-0.567054	0.0202633	0.272311	1	1
SPDYC	-2.25796	-0.584595	0.0211148	0.282264	1	1
HTR3A	-2.25393	-0.0173527	0.00569991	0.0915735	0.250012	1
DARS	-2.24731	-0.718163	0.0294703	0.370624	1	1
DDX17	-2.23515	-0.533862	0.0197935	0.267205	1	1
API5	-2.23151	-0.665333	0.0270532	0.347329	1	1
CENPP	-2.22956	-0.651444	0.0263173	0.338857	1	1
PSMB2	-2.22947	-0.77019	0.034631	0.421265	1	1
ZEB2	-2.22926	-0.737461	0.0321254	0.398673	1	1
DHDDS	-2.22836	-0.845047	0.0412701	0.488043	1	1
negConGene150	-2.22822	-0.309038	0.0119452	0.172067	1	1
PRPF18	-2.22112	-0.676078	0.0284072	0.360816	1	1
CCDC77	-2.21716	-0.65316	0.0271898	0.348831	1	1
PDXK	-2.21699	-0.618135	0.0250853	0.325343	1	1
FOXRED1	-2.21692	-0.647485	0.0268501	0.345219	1	1
MELK	-2.21425	-0.447584	0.0170134	0.233744	1	1
TAF1	-2.21251	-0.780198	0.0368565	0.444396	1	1
NLRP10	-2.21134	-0.731453	0.0330216	0.407243	1	1
MTHFD2	-2.21127	-0.785496	0.0374168	0.449935	1	1
PRR14L	-2.21042	-0.732271	0.0331544	0.408035	1	1
GOLPH3	-2.20672	-0.548918	0.0218885	0.29043	1	1
CXorf56	-2.20642	-0.790514	0.0382786	0.45906	1	1
ELOVL4	-2.2048	-0.48582	0.0189996	0.257462	1	1
PARS2	-2.20248	-0.927259	0.0529614	0.598138	1	1
USMG5	-2.20081	-0.508477	0.020208	0.271894	1	1
MAP2K3	-2.19559	-0.765018	0.0370043	0.445576	1	1
DRAP1	-2.19121	-0.718383	0.0335644	0.411943	1	1
CLCF1	-2.19049	-0.551186	0.0228455	0.300224	1	1
NPM1	-2.18554	-0.719691	0.0341098	0.416276	1	1
ARID1A	-2.18476	-0.712294	0.0335928	0.412009	1	1
COA7	-2.17828	-0.773001	0.03923	0.468265	1	1
ELL	-2.17773	-0.702234	0.0333583	0.409978	1	1
SAMD1	-2.17736	-0.642313	0.0290708	0.366374	1	1
SLF2	-2.175	-0.725177	0.035396	0.429399	1	1
MTA1	-2.17251	-0.630357	0.028598	0.362208	1	1
HIPK1	-2.17209	-0.82025	0.0443794	0.517943	1	1
FOSL1	-2.17165	-0.684473	0.0324703	0.401834	1	1
JARID2	-2.1707	-0.78298	0.0408521	0.484064	1	1
MED16	-2.17013	-0.708949	0.0344792	0.419704	1	1
DAZAP1	-2.16961	-0.690334	0.0330683	0.407538	1	1
WDR86	-2.16918	-0.222592	0.0112088	0.162641	1	1
EZH2	-2.16234	-0.574711	0.0257449	0.332687	1	1
SYNCRIP	-2.16124	-0.750756	0.0387613	0.464225	1	1
SCARA5	-2.15367	-0.646253	0.0309875	0.386974	1	1
TUBGCP3	-2.15194	-0.600335	0.0279796	0.356401	1	1
MRPL47	-2.14878	-0.773371	0.0420297	0.49473	1	1
ACTR5	-2.14806	-0.775084	0.0422663	0.496205	1	1
MRPL35	-2.14483	-0.52821	0.024076	0.313392	1	1
PLCXD2	-2.14195	-0.768308	0.0422013	0.496205	1	1
GIPC1	-2.14098	-0.488373	0.0221535	0.292639	1	1
FTSJ3	-2.13307	-0.626902	0.0310771	0.387823	1	1
MIS12	-2.12979	-0.659643	0.0337732	0.413251	1	1
PEX12	-2.12951	-0.643942	0.0325912	0.402771	1	1
RPUSD2	-2.12897	-0.725635	0.0394062	0.470054	1	1
GPATCH4	-2.12835	-0.624786	0.031264	0.389712	1	1
FOXC2	-2.12762	-0.559952	0.0269603	0.346386	1	1
PSME3	-2.12549	-0.670018	0.0349371	0.424699	1	1
NHEJ1	-2.12475	-0.522058	0.0248637	0.322704	1	1
MCM7	-2.12151	-0.680039	0.0360847	0.435975	1	1
TIMM9	-2.1194	-0.643647	0.0333386	0.409978	1	1
MED28	-2.11918	-0.790559	0.0468223	0.539743	1	1
ATRIP	-2.11694	-0.997076	0.0757821	0.791231	1	1
TBPL1	-2.1168	-0.607245	0.0308346	0.385455	1	1
EMC2	-2.11437	-0.627092	0.0324625	0.401834	1	1
TXNDC15	-2.11274	-0.507869	0.0247386	0.321548	1	1
HSPB11	-2.1116	-0.571974	0.028765	0.364047	1	1
CSF2	-2.10905	-0.611767	0.0317211	0.394203	1	1
SLC35D1	-2.10749	-0.561798	0.0283648	0.360534	1	1
DNAJC11	-2.09712	-0.720036	0.0418682	0.493154	1	1
MRE11A	-2.09579	-0.774216	0.0475898	0.547176	1	1
SLC39A11	-2.09506	-0.552756	0.0285878	0.362208	1	1
SKIV2L2	-2.09425	-0.759304	0.0461442	0.533096	1	1
FAM3C	-2.09331	-0.443152	0.022279	0.293862	1	1
ADCY1	-2.09058	-0.358126	0.0184157	0.250693	1	1
PPA2	-2.09054	-0.531948	0.0275319	0.352207	1	1
PSMA6	-2.08902	-0.570362	0.0301927	0.378907	1	1
PTCD3	-2.0873	-0.55119	0.029	0.365741	1	1
KIF20B	-2.08624	-0.442046	0.0225883	0.297282	1	1
PKMYT1	-2.08068	-0.730262	0.0445255	0.51863	1	1
GABPA	-2.07393	-0.610196	0.0342765	0.417807	1	1
EHMT2	-2.07017	-0.838073	0.0585001	0.64278	1	1
SPATA6	-2.07	-0.476306	0.0253864	0.329008	1	1
ATP5L2	-2.06944	-0.495595	0.0265781	0.341968	1	1
RAB24	-2.0688	-0.438943	0.0233498	0.305277	1	1
CTDSPL2	-2.06767	-0.398667	0.0213288	0.284912	1	1
PELP1	-2.06538	-0.679107	0.0409895	0.485048	1	1
PPP4R3A	-2.06498	-0.595608	0.0338331	0.413251	1	1
HNRNPAB	-2.06282	-0.435014	0.0234613	0.306509	1	1
FANCI	-2.04942	-0.842911	0.0620576	0.675625	1	1
MZT1	-2.04856	-0.637658	0.0387235	0.464084	1	1
NSF	-2.04853	-0.604534	0.0358756	0.434037	1	1
RNASE13	-2.0485	-0.156595	0.012726	0.181554	0.395948	1
DDX18	-2.04543	-0.707904	0.0458699	0.531054	1	1
TRAIP	-2.04513	-0.699514	0.045021	0.523377	1	1
SPN	-2.04154	-0.568392	0.0335399	0.411926	1	1
TTF1	-2.04065	-0.570982	0.0338102	0.413251	1	1
EPB42	-2.03845	-0.526208	0.0306439	0.383489	1	1
SDHD	-2.03789	-0.518713	0.0301567	0.378721	1	1
HDAC8	-2.03777	-0.603733	0.0367101	0.44293	1	1
OR8K3	-2.03633	-0.497045	0.0287879	0.364047	1	1
FAM98B	-2.03242	-0.801435	0.0586514	0.644046	1	1
ESCO2	-2.03131	-0.724668	0.0492576	0.562362	1	1
SLC5A4	-2.0297	-0.515068	0.0304754	0.381806	1	1
POPDC3	-2.02957	-0.54575	0.0327233	0.403844	1	1
ACIN1	-2.02418	-0.562038	0.034403	0.419063	0.828717	1
ZNHIT1	-2.02319	-0.643663	0.0416328	0.49103	1	1
MRFAP1	-2.02069	-0.338794	0.020702	0.277162	1	1
SURF4	-2.01829	-0.503835	0.0304875	0.381806	1	1
EXOSC8	-2.01619	-0.62975	0.0409737	0.485048	1	1
TACC3	-2.01481	-0.619286	0.0401228	0.477272	1	1
AURKA	-2.01247	-0.513317	0.0315845	0.39304	1	1
EIF1AD	-2.01158	-0.631358	0.0415661	0.490893	1	1
ZMIZ1	-2.01114	-0.427635	0.0259914	0.334903	1	1
NUP210L	-2.01048	-0.539278	0.0336905	0.412923	1	1
TMEM170A	-2.00412	-0.558167	0.0357131	0.432364	1	1
CYB561A3	-2.00278	-0.250336	0.017583	0.24009	1	1
PSMB7	-2.00237	-0.692315	0.0488715	0.559028	1	1
COPZ1	-1.99836	-0.802414	0.0635867	0.687654	1	1
SRP68	-1.9972	-0.734203	0.0544767	0.610228	1	1
GP1BB	-1.99431	-0.685962	0.0490647	0.560878	1	1
CEP68	-1.98985	-0.457011	0.0292199	0.367733	1	1
CYTH2	-1.98598	-0.351998	0.0231285	0.302642	1	1
AAGAB	-1.98497	-0.628975	0.0439556	0.514007	1	1
QARS	-1.98392	-0.655147	0.0468061	0.539743	1	1
TNP1	-1.98229	-0.512634	0.0338115	0.413251	1	1
DPH1	-1.98181	-0.533098	0.0354866	0.430205	1	1
KHSRP	-1.97896	-0.436336	0.0285667	0.362208	1	1
SH3BP5	-1.97892	-0.591156	0.0408483	0.484064	1	1
HSD17B10	-1.97409	-0.703515	0.0535325	0.60268	1	1
DVL1	-1.97319	-0.625023	0.0447573	0.52099	1	1
RPS26	-1.97288	-0.760644	0.0612433	0.667575	1	1
CHTOP	-1.97261	-0.735965	0.0578896	0.637644	1	1
DMXL1	-1.97255	-0.529359	0.0359423	0.434549	1	1
VPS37A	-1.97226	-0.433226	0.0288045	0.364047	1	1
SEPT14	-1.97171	-0.267283	0.0196504	0.265675	1	1
PSD	-1.96789	-0.50226	0.0341275	0.416276	1	1
PWWP2A	-1.96768	-0.728975	0.0576155	0.63541	1	1
COX5A	-1.965	-0.71463	0.0560861	0.623371	1	1
ZNF410	-1.96374	-0.573701	0.0406343	0.482444	1	1
PROX2	-1.96036	-0.425682	0.0290959	0.366431	1	1
CASZ1	-1.95964	-0.550803	0.0389091	0.465682	1	1
LAP3	-1.95856	-0.334245	0.0236514	0.308767	1	1
DHRSX	-1.95373	-0.727155	0.0592509	0.64956	1	1
VOPP1	-1.95313	-0.622263	0.0465807	0.537653	1	1
SLC3A2	-1.94414	-0.682964	0.0547057	0.612409	1	1
FOXK1	-1.94323	-0.777982	0.0682518	0.72926	1	1
BCCIP	-1.9432	-0.724437	0.0603282	0.659615	1	1
TTC36	-1.94085	-0.540862	0.0397122	0.473071	1	1
FANCD2	-1.94016	-0.726472	0.0610375	0.665738	1	1
DHX38	-1.93281	-0.612338	0.0477109	0.548214	1	1
TCF3	-1.92936	-0.375587	0.0278402	0.355131	0.217076	1
MTR	-1.92863	-0.654894	0.0531434	0.599814	1	1
NCOR2	-1.92819	-0.730303	0.0633033	0.68542	1	1
GNL3	-1.92585	-0.438981	0.0324937	0.401845	0.00737062	0.684015
CCDC22	-1.92223	-0.681218	0.0573097	0.634054	1	1
SFSWAP	-1.91493	-0.519556	0.0401368	0.477272	1	1
SEPSECS	-1.91344	-0.416611	0.0317544	0.394343	1	1
TAF11	-1.91223	-0.799153	0.0769775	0.799965	1	1
FGF1	-1.90842	-0.703335	0.0622608	0.677424	1	1
DDIAS	-1.9077	-0.584558	0.0474178	0.545549	1	1
RAD50	-1.90548	-0.558117	0.0448405	0.521618	1	1
negConGene53	-1.90437	-0.622109	0.052108	0.58962	1	1
CXorf65	-1.90404	-0.383422	0.0300568	0.377733	1	1
ADAT2	-1.90392	-0.686314	0.0604896	0.66057	1	1
TONSL	-1.89965	-0.737644	0.068765	0.733424	1	1
DSPP	-1.89883	-0.659253	0.0575007	0.634536	1	1
POLR2C	-1.89027	-0.594856	0.0505505	0.574431	1	1
RRP7A	-1.88691	-0.78449	0.0788908	0.814627	1	1
AASDHPPT	-1.88557	-0.724028	0.0688371	0.733755	1	1
ADCY4	-1.88525	-0.667139	0.0604186	0.660199	1	1
APOBR	-1.88358	-0.58693	0.050407	0.573383	1	1
HIST1H2BD	-1.88234	-0.234142	0.0223801	0.294977	1	1
HEMGN	-1.88113	-0.46238	0.0380284	0.456366	1	1
HCLS1	-1.87807	-0.148514	0.0185401	0.252193	0.48369	1
STX18	-1.87609	-0.480807	0.0401451	0.477272	1	1
POLR3A	-1.86958	-0.529142	0.0455626	0.528295	1	1
MAEA	-1.86763	-0.627601	0.0574396	0.634536	1	1
KDELR2	-1.86514	-0.4586	0.0391154	0.4677	1	1
TSEN2	-1.86276	-0.522024	0.0455316	0.52828	1	1
UBL3	-1.85807	-0.621258	0.0578685	0.637644	1	1
CLCNKA	-1.85712	-0.553811	0.0496386	0.565827	1	1
EFTUD2	-1.8568	-0.408574	0.0355266	0.430398	1	1
GLE1	-1.85655	-0.540762	0.0482297	0.55275	1	1
PSMC3	-1.85243	-0.665954	0.0649911	0.699871	0.481157	1
NUBP2	-1.85131	-0.562059	0.0512747	0.581951	1	1
CSE1L	-1.85017	-0.626791	0.0596892	0.653832	0.963417	1
APOBEC2	-1.84946	-0.443084	0.0391302	0.4677	1	1
SLC7A6	-1.84738	-0.552147	0.0505723	0.574431	1	1
CALD1	-1.84438	-0.391866	0.0351767	0.427029	1	1
CBFA2T3	-1.84324	-0.616754	0.0592628	0.64956	1	1
CRY2	-1.84003	-0.709686	0.073972	0.776881	1	1
PFN1	-1.83569	-0.585738	0.0561405	0.623383	1	1
MED10	-1.83362	-0.663556	0.0674977	0.7225	1	1
HDDC2	-1.83274	-0.629949	0.0625912	0.67936	1	1
GTF2H1	-1.83039	-0.693463	0.0728582	0.766085	1	1
TRPC1	-1.83006	-0.404908	0.0374703	0.450275	1	1
IGDCC4	-1.82983	-0.546839	0.0520212	0.589012	1	1
PPP1R7	-1.82871	-0.713814	0.0766538	0.797996	1	1
XRCC1	-1.82484	-0.738166	0.0818076	0.836032	1	1
CLP1	-1.82374	-0.557225	0.0540354	0.607192	1	1
CEP55	-1.82206	-0.556312	0.054131	0.607501	1	1
ZBTB14	-1.82079	-0.661256	0.0691581	0.735857	1	1
TBCE	-1.81918	-0.567112	0.0558666	0.621503	1	1
C4orf47	-1.81857	-0.529805	0.0513323	0.581951	1	1
RNH1	-1.81722	-0.549045	0.05383	0.605265	1	1
NLRX1	-1.81503	-0.632167	0.0655353	0.70488	1	1
RBPJ	-1.81289	-0.526986	0.0516718	0.585428	1	1
FAM78A	-1.81153	-0.446173	0.0430169	0.504353	1	1
ERGIC3	-1.81003	-0.559802	0.0561044	0.623371	1	1
PFKP	-1.808	-0.731578	0.083765	0.851643	1	1
N6AMT1	-1.80544	-0.770898	0.0922538	0.916525	1	1
ZCCHC3	-1.8045	-0.316798	0.0324311	0.401834	1	1
FAM136A	-1.8033	-0.708005	0.0801979	0.821936	1	1
CACNG5	-1.80221	-0.745131	0.0875845	0.881928	1	1
SPSB2	-1.80112	-0.398933	0.0395109	0.470987	1	1
INO80	-1.79729	-0.517366	0.0523894	0.592229	1	1
ZFAT	-1.79681	-0.732462	0.0861283	0.869721	1	1
RMND1	-1.79611	-0.457286	0.0457324	0.52992	1	1
CLDN4	-1.79242	-0.610024	0.065606	0.705215	1	1
RALGAPB	-1.79235	-0.693645	0.0795707	0.81833	1	1
HSPA5	-1.79164	-0.695869	0.0801102	0.821509	1	1
SEMA3G	-1.7912	-0.431033	0.0435353	0.509426	1	1
ZNF22	-1.79024	-0.446277	0.0451936	0.524698	1	1
HCCS	-1.78953	-0.682142	0.0779921	0.807216	1	1
RAD23A	-1.78547	-0.405791	0.0416175	0.49103	1	1
SFXN1	-1.78243	-0.73237	0.0890129	0.893788	1	1
PTBP1	-1.78213	-0.525199	0.0552436	0.617302	1	1
COMMD6	-1.77995	-0.637095	0.071869	0.758816	1	1
HNRNPH1	-1.77737	-0.61913	0.0693638	0.737166	1	1
SLC1A7	-1.77557	-0.424044	0.0444117	0.517981	1	1
HIGD2A	-1.77244	-0.492639	0.0524049	0.592229	1	1
EIF3L	-1.77218	-0.532559	0.0574944	0.634536	1	1
RTCB	-1.76969	-0.668469	0.0791097	0.814999	1	1
SYT8	-1.76961	-0.27052	0.0315888	0.39304	1	1
FBXW2	-1.76924	-0.396139	0.0422544	0.496205	1	1
RAPGEF4	-1.76916	-0.55024	0.0603066	0.659615	1	1
RRP36	-1.76535	-0.430514	0.046156	0.533096	1	1
TPK1	-1.76259	-0.720453	0.0906534	0.904835	1	1
ING3	-1.76046	-0.577062	0.0654539	0.704429	1	1
LHX3	-1.75891	-0.249492	0.0308442	0.385455	1	1
ZP1	-1.75814	-0.375191	0.0413048	0.48813	1	1
UTP14A	-1.75699	-0.57892	0.0662635	0.711425	1	1
EFR3A	-1.7557	-0.285076	0.0337356	0.413192	1	1
IP6K1	-1.75558	-0.45901	0.0504158	0.573383	1	1
C22orf29	-1.7539	-0.606195	0.0710689	0.752101	1	1
CRIP2	-1.75377	-0.265205	0.0323661	0.40138	1	1
GCLC	-1.75358	-0.552205	0.0627962	0.68117	1	1
PPP2R1A	-1.75333	-0.704457	0.0892565	0.895226	1	1
MIOX	-1.7531	-0.498594	0.0555534	0.619565	0.70845	1
NCBP1	-1.75215	-0.48126	0.0534933	0.60268	0.986697	1
MID1IP1	-1.75018	-0.509474	0.0573503	0.634054	1	1
PAAF1	-1.75013	-0.265736	0.0326799	0.403588	1	1
EED	-1.749	-0.644507	0.0785144	0.811679	1	1
RAB39B	-1.74873	-0.617118	0.0737561	0.77507	1	1
CEBPZ	-1.74766	-0.543231	0.0623562	0.677635	1	1
GMPPB	-1.74726	-0.731602	0.0963593	0.948742	1	1
MRPS12	-1.74697	-0.659659	0.0816871	0.835758	1	1
HTRA2	-1.7429	-0.556315	0.0649756	0.699871	1	1
ABL1	-1.74276	-0.593433	0.0708048	0.750691	1	1
SDCCAG3	-1.74052	-0.499077	0.0572527	0.634054	1	1
JMJD7-PLA2G4B	-1.7382	-0.430411	0.0491276	0.561238	1	1
VDAC1	-1.73446	-0.0675583	0.0214329	0.286042	0.11363	1
NAA10	-1.7343	-0.611116	0.0752041	0.787039	1	1
MALSU1	-1.73352	-0.652448	0.082872	0.844972	1	1
PCDHAC2	-1.73199	-0.560135	0.0672197	0.720824	1	1
TRIM44	-1.72892	-0.684052	0.0900849	0.900495	1	1
PRSS58	-1.72662	-0.648897	0.0835145	0.84958	1	1
TNPO3	-1.72456	-0.656757	0.0854465	0.863324	1	1
SUMO2	-1.72373	-0.650118	0.0843082	0.856677	1	1
ISL2	-1.72284	-0.433854	0.0513059	0.581951	1	1
BRICD5	-1.72121	-0.732832	0.102613	0.995591	1	1
RIMS2	-1.72088	-0.329809	0.0405373	0.481614	0.871671	1
LTB	-1.72077	-0.556002	0.068327	0.729626	1	1
H1FX	-1.71945	-0.448766	0.0535186	0.60268	1	1
CTRB2	-1.71769	-0.630793	0.0817653	0.836032	1	1
AAR2	-1.71606	-0.412044	0.049557	0.565419	1	1
FAM162B	-1.712	-0.322975	0.0407297	0.483256	1	1
CLCN2	-1.70973	-0.443546	0.054077	0.607276	1	1
LSM2	-1.70914	-0.595229	0.0768294	0.799358	1	1
RMND5A	-1.70739	-0.599875	0.0779705	0.807216	1	1
HOXA6	-1.70271	-0.557097	0.0714132	0.754897	1	1
KRT6C	-1.70229	-0.583401	0.0759518	0.792075	1	1
SRSF6	-1.6996	-0.558356	0.0721372	0.760297	1	1
CALHM3	-1.69919	-0.443653	0.0554222	0.618489	1	1
CTPS1	-1.69209	-0.722896	0.107251	1	1	1
THOC7	-1.6884	-0.447593	0.0573372	0.634054	1	1
MRPL30	-1.68497	-0.413214	0.0533867	0.602179	1	1
PEX13	-1.68344	-0.6195	0.0862102	0.870055	1	1
MT2A	-1.68263	-0.678402	0.0989308	0.968295	1	1
NEUROD2	-1.67896	-0.326358	0.0443012	0.517369	0.258648	1
VARS2	-1.67726	-0.569659	0.0779546	0.807216	1	1
FAM162A	-1.67475	-0.60618	0.0852937	0.863248	1	1
PEBP4	-1.67473	-0.348551	0.0470872	0.542446	1	1
ATP6AP1	-1.66851	-0.304278	0.0431279	0.505322	1	1
RSPH6A	-1.66625	-0.496066	0.0674792	0.7225	1	1
GEMIN4	-1.66503	-0.56122	0.0786388	0.812495	1	1
GPR78	-1.66233	-0.520131	0.0719777	0.759514	1	1
MND1	-1.66216	-0.234303	0.0372372	0.448077	1	1
ZMAT2	-1.6613	-0.608872	0.0885286	0.889927	1	1
RASSF10	-1.6561	-0.428869	0.0591614	0.649247	1	1
SLX4	-1.65495	-0.441149	0.0610225	0.665738	1	1
BEST1	-1.653	-0.407412	0.0567087	0.628909	1	1
KARS	-1.65258	-0.669978	0.103988	1	1	1
RFXAP	-1.64991	-0.477303	0.0671041	0.720016	0.599587	1
AURKC	-1.64942	-0.734236	0.121468	1	1	1
BRINP1	-1.6494	-0.622976	0.0939978	0.929959	1	1
MANEA	-1.64868	-0.529445	0.0758917	0.791911	1	1
SOX2	-1.64857	-0.510291	0.0726307	0.764144	1	1
LAT2	-1.6474	-0.302722	0.0451195	0.52418	1	1
TSPAN6	-1.64704	-0.39442	0.0557962	0.621503	1	1
PHF8	-1.6464	-0.386419	0.0548571	0.613718	1	1
SRRM2	-1.64321	-0.541753	0.0790672	0.814999	1	1
TMEM106C	-1.643	-0.331466	0.048705	0.557482	1	1
KANSL3	-1.64225	-0.432793	0.0616371	0.671456	1	1
DNTTIP2	-1.64016	-0.549784	0.0811125	0.830833	1	1
MRVI1	-1.6392	-0.31931	0.0477757	0.548252	0.393886	1
LEMD2	-1.63915	-0.570361	0.0852518	0.863248	1	1
BOLA3	-1.63901	-0.475461	0.0685208	0.731258	1	1
RPS14	-1.6389	-0.208257	0.0369984	0.445576	0.136981	1
RAP1A	-1.63781	-0.403082	0.0581474	0.639693	1	1
PPOX	-1.63762	-0.231817	0.0391824	0.46801	0.331549	1
PRPF3	-1.63737	-0.418127	0.0602617	0.659615	1	1
LARP4B	-1.63707	-0.283539	0.0442066	0.516604	1	1
ENTHD2	-1.63364	-0.662421	0.106752	1	1	1
NEGR1	-1.63346	-0.585634	0.0894726	0.896385	1	1
TERF1	-1.63214	-0.384357	0.0564225	0.626125	1	1
KIF22	-1.62771	-0.292171	0.0460812	0.532923	1	1
PTMA	-1.62769	-0.627338	0.0998189	0.974847	1	1
C7orf77	-1.62761	-0.45725	0.0674528	0.7225	1	1
RBM39	-1.62558	-0.711769	0.121852	1	1	1
RRN3	-1.62493	-0.615353	0.0977199	0.959603	1	1
TJP3	-1.62458	-0.420125	0.0623513	0.677635	1	1
SAP18	-1.62219	-0.69528	0.118229	1	1	1
HTT	-1.62087	-0.352157	0.053762	0.604882	1	1
C5orf24	-1.62037	-0.416635	0.062456	0.678305	1	1
DHDH	-1.61474	-0.357836	0.0552467	0.617302	1	1
NOL4L	-1.6139	-0.583149	0.0930635	0.922858	1	1
PPAT	-1.61085	-0.527615	0.0824594	0.841728	1	1
NOL10	-1.60708	-0.625864	0.10432	1	1	1
POP5	-1.60708	-0.580775	0.0940233	0.929959	1	1
LRP12	-1.6068	-0.538673	0.0853809	0.863324	1	1
COPB1	-1.60497	-0.605416	0.100002	0.975021	1	1
TUBB1	-1.60419	-0.413216	0.0643202	0.693904	1	1
EFNA2	-1.6035	-0.40513	0.0632329	0.685075	1	1
AP3S1	-1.60224	-0.369323	0.0583906	0.641972	1	1
ECT2	-1.60185	-0.229887	0.0423658	0.497045	0.0315264	0.990565
CMIP	-1.60162	-0.491139	0.0774392	0.803826	1	1
KANSL1	-1.60135	-0.442291	0.0692334	0.736219	1	1
HSD17B8	-1.60051	-0.440481	0.069078	0.735443	1	1
PSMD1	-1.60043	-0.227253	0.042247	0.496205	1	1
TMEM160	-1.59943	-0.297789	0.0498296	0.56744	1	1
BTG1	-1.59771	-0.561258	0.0918482	0.913004	1	1
PIK3CD	-1.59639	-0.528534	0.085435	0.863324	1	1
VPS54	-1.59557	-0.494877	0.0792069	0.81553	1	1
FAM46A	-1.59552	-0.342921	0.0557986	0.621503	1	1
RBM7	-1.59435	-0.338264	0.0553517	0.618089	1	1
ST6GALNAC1	-1.59415	-0.359244	0.0581236	0.639693	1	1
MSI2	-1.59283	-0.603701	0.102435	0.994406	1	1
PFDN2	-1.59282	-0.68216	0.122739	1	1	1
PSMB1	-1.59228	-0.53282	0.0871047	0.878585	1	1
SPRTN	-1.59071	-0.589947	0.0997245	0.974763	1	1
CHERP	-1.58641	-0.651092	0.115961	1	1	1
DDX20	-1.58482	-0.320831	0.0543514	0.609207	1	1
TMEM39B	-1.58397	-0.386892	0.0634214	0.686283	0.719217	1
WDR20	-1.5792	-0.509844	0.085141	0.862682	1	1
TMEM156	-1.5755	-0.473932	0.0790466	0.814999	1	1
ASB18	-1.57389	-0.568674	0.0987053	0.966618	1	1
ARHGAP9	-1.56941	-0.489169	0.0830296	0.846095	1	1
THOC2	-1.56874	-0.402925	0.0681628	0.728746	1	1
POLR3C	-1.56703	-0.508937	0.0873801	0.880367	1	1
EPCAM	-1.56681	-0.374408	0.0641088	0.692041	1	1
MRPL46	-1.56504	-0.516611	0.0893472	0.895632	1	1
ABCD1	-1.56428	-0.527179	0.0917111	0.912659	1	1
EFHD2	-1.56423	-0.459094	0.0783999	0.810966	1	1
UHRF2	-1.56347	-0.531553	0.0928146	0.921561	1	1
PLEKHG1	-1.56236	-0.513115	0.0891796	0.894957	1	1
POLR3F	-1.56133	-0.524688	0.091809	0.913004	1	1
PEX14	-1.56104	-0.570301	0.102054	0.99179	1	1
NR2C2AP	-1.56072	-0.541182	0.095501	0.941964	1	1
TSPAN19	-1.56055	-0.315894	0.0568306	0.62987	1	1
RAPGEF3	-1.55975	-0.521126	0.091391	0.910663	1	1
RSL1D1	-1.55957	-0.451097	0.0777989	0.806621	1	1
ANLN	-1.55814	-0.679924	0.132269	1	1	1
GMNN	-1.55595	-0.658054	0.126404	1	1	1
PHPT1	-1.55556	-0.375329	0.0659349	0.708323	1	1
MKL1	-1.5526	-0.553181	0.100035	0.975021	1	1
OTUD5	-1.55181	-0.455384	0.0799886	0.821207	1	1
EXOC2	-1.55058	-0.712862	0.145204	1	1	1
ACTL7A	-1.54817	-0.519287	0.0934661	0.925989	1	1
SNAI1	-1.54801	-0.53752	0.0975126	0.958095	1	1
SHMT2	-1.54703	-0.500285	0.0896961	0.897451	1	1
JUNB	-1.54554	-0.208201	0.0458899	0.531054	1	1
SMIM5	-1.54477	-0.44318	0.0790421	0.814999	1	1
STRAP	-1.54357	-0.542944	0.0997556	0.974763	1	1
HLA-DRB5	-1.54357	-0.485141	0.0873121	0.880179	1	1
ORAOV1	-1.5434	-0.342872	0.0629193	0.682091	1	1
TMCO4	-1.54304	-0.398298	0.0715567	0.755966	1	1
ABCB7	-1.54148	-0.41305	0.0743002	0.779868	1	1
NGRN	-1.53765	-0.439313	0.079637	0.81854	1	1
ZSCAN26	-1.53586	-0.647049	0.129078	1	1	1
ASPM	-1.5349	-0.58925	0.11323	1	0.314279	1
PRKDC	-1.53261	-0.419141	0.0769067	0.799695	1	1
SWI5	-1.53195	-0.588704	0.11386	1	1	1
BRD7	-1.53159	-0.461461	0.0849891	0.862122	1	1
MED6	-1.53101	-0.59702	0.116316	1	1	1
FOXA3	-1.53014	-0.0513791	0.0331079	0.407745	0.218327	1
PSTPIP1	-1.52996	-0.340244	0.0645075	0.695503	1	1
ATP6V1G1	-1.52826	-0.515984	0.097114	0.954705	1	1
LAMTOR1	-1.52607	-0.517782	0.0980089	0.960536	1	1
CFP	-1.52526	-0.199752	0.0471595	0.542928	0.12864	1
RBM4	-1.52401	-0.367368	0.0696196	0.739444	1	1
LTK	-1.5207	-0.565681	0.110814	1	1	1
SUPT6H	-1.52013	-0.710718	0.15499	1	1	1
THRAP3	-1.51979	-0.550746	0.107289	1	1	1
MTX1	-1.51632	-0.604547	0.122425	1	1	1
FAM35A	-1.51369	-0.56314	0.111959	1	1	1
SUPT7L	-1.51264	-0.416061	0.0799603	0.821207	1	1
LRRC8D	-1.5082	-0.356071	0.0703487	0.746743	1	1
DHX36	-1.50739	-0.456951	0.0889348	0.893507	1	1
C1orf109	-1.50692	-0.552378	0.110934	1	1	1
IL31	-1.50494	-0.558205	0.112948	1	1	1
LTBP3	-1.50196	-0.151124	0.0444823	0.518466	1	1
ABCB5	-1.50175	-0.189662	0.0486434	0.557134	1	1
ACTL6A	-1.50127	-0.483162	0.095816	0.944026	1	1
ZNF236	-1.4994	-0.330652	0.0677027	0.72426	1	1
IREB2	-1.49856	-0.518415	0.104579	1	1	1
RBBP8	-1.49758	-0.524908	0.106395	1	1	1
EIF3H	-1.49618	-0.600465	0.127042	1	1	1
KIAA1328	-1.49562	-0.496299	0.100055	0.975021	1	1
ATRX	-1.49336	-0.555719	0.115341	1	1	1
CUL4A	-1.48856	-0.574531	0.12179	1	1	1
RPL41	-1.4883	-0.630879	0.138761	1	1	1
ENDOG	-1.48442	-0.484567	0.0999347	0.975021	1	1
CTDP1	-1.48218	-0.320955	0.0688877	0.733856	1	1
DIS3L2	-1.48183	-0.620477	0.137509	1	1	1
COPS2	-1.4794	-0.551679	0.118008	1	1	1
CNGA4	-1.47903	-0.100956	0.0417726	0.492353	1	1
DGCR14	-1.47815	-0.357193	0.0755913	0.790164	1	1
ANO1	-1.47635	-0.366838	0.0776124	0.805155	1	1
BCLAF1	-1.4746	-0.323263	0.0704775	0.747665	0.833976	1
PARD6A	-1.47328	-0.357961	0.0765793	0.797996	1	1
WDR33	-1.4726	-0.508328	0.108474	1	1	1
PSMA5	-1.47235	-0.323815	0.0709338	0.751324	1	1
COQ2	-1.47212	-0.400487	0.0846938	0.859616	1	1
MMP23B	-1.4716	-0.552565	0.120395	1	1	1
PHACTR2	-1.47079	-0.323307	0.0711065	0.752101	1	1
TPD52L2	-1.46977	-0.447065	0.0948056	0.936659	1	1
APEH	-1.46917	-0.348751	0.0756854	0.790684	1	1
CABP7	-1.46901	-0.165855	0.0496562	0.565827	1	1
PIAS2	-1.4669	-0.214736	0.055855	0.621503	1	1
MRPL21	-1.46492	-0.541795	0.119266	1	1	1
MCM9	-1.46435	-0.445791	0.0957176	0.943578	1	1
CHORDC1	-1.46428	-0.665824	0.158953	1	1	1
ZCCHC5	-1.4642	-0.486959	0.105279	1	1	1
NDRG3	-1.4631	-0.520837	0.114119	1	0.53785	1
FEN1	-1.46041	-0.497067	0.108707	1	1	1
PCBP2	-1.45767	-0.474106	0.103758	1	1	1
CHMP3	-1.45564	-0.334314	0.0755257	0.789941	1	1
TRPM7	-1.45468	-0.555484	0.126027	1	1	1
SV2B	-1.45375	-0.43236	0.0950948	0.938996	1	1
CDC34	-1.45175	-0.542167	0.123044	1	0.303645	1
PLA2G12B	-1.45172	-0.396265	0.0879119	0.884725	1	1
C3orf67	-1.44849	-0.450547	0.100376	0.977608	1	1
MTRF1L	-1.44685	-0.527329	0.120259	1	1	1
NUP43	-1.44417	-0.487265	0.110332	1	1	1
THG1L	-1.44397	-0.454756	0.102415	0.994406	1	1
ZCCHC6	-1.4423	-0.649618	0.161081	1	1	1
CCT5	-1.43982	-0.316311	0.0751471	0.786904	0.717602	1
PERM1	-1.43806	-0.457457	0.104467	1	1	1
KLHL4	-1.43713	-0.521285	0.121282	1	1	1
NSUN2	-1.43691	-0.452198	0.103484	1	1	1
HAUS7	-1.43502	-0.569552	0.13621	1	1	1
CYP8B1	-1.43462	-0.54461	0.128723	1	1	1
PBRM1	-1.43454	-0.470702	0.108584	1	1	1
PTPN11	-1.4337	-0.493721	0.114721	1	1	1
PGBD2	-1.43306	-0.353265	0.0831148	0.846479	1	1
BEAN1	-1.4325	-0.568029	0.136523	1	1	1
ZIC3	-1.43157	-0.418703	0.0969813	0.953926	1	1
UBE2V2	-1.43142	-0.559447	0.134185	1	1	1
CKS1B	-1.43011	-0.56982	0.137847	1	1	1
MRRF	-1.42745	-0.56059	0.135775	1	1	1
CCDC153	-1.42664	-0.299985	0.0746043	0.782599	1	1
DDX42	-1.42461	-0.512546	0.122343	1	1	1
FAM150A	-1.42207	-0.583409	0.144891	1	1	1
METTL3	-1.42178	-0.647758	0.16816	1	1	1
[truncated: 15,979 more rows]

## Sheet: RPE1_WT-BARBEKO
Gene	Fitness Score	ZLFC	RRA_depletion	RRA_depletion_FDR	RRA_enrichment	RRA_enrichment_FDR
[truncated: 17,833 more rows]

[truncated: 1 more sheets: RPE1_TP53KO-BARBEKO]
